# Supplementary material for: Ambient ozone pollution at a coal chemical industry city in the border of Loess Plateau and Mu Us Desert: characteristics, sensitivity analysis and control strategies
Source: PeerJ. 2021 Apr 27;9:e11322. doi: 10.7717/peerj.11322 (PMC8086580; doi:10.7717/peerj.11322)
Supplement: Supplemental Information 2 [file peerj-09-11322-s002.xlsx]

## Sheet: Hourly O3 concentration (ppbv)
Date	Time	EMS site	EMB site	CS site	HGEP site
2017-01-01	00:00:00	—	—	—	—
2017-01-01	01:00:00	4.66667	3.26667	3.73333	0.933333
2017-01-01	02:00:00	1.4	1.86667	2.33333	0.933333
2017-01-01	03:00:00	1.4	1.86667	2.33333	0.933333
2017-01-01	04:00:00	1.4	1.86667	2.33333	0.933333
2017-01-01	05:00:00	1.4	1.4	2.33333	0.933333
2017-01-01	06:00:00	1.4	1.4	2.33333	0.933333
2017-01-01	07:00:00	1.86667	1.4	2.8	0.933333
2017-01-01	08:00:00	1.86667	1.86667	2.8	0.933333
2017-01-01	09:00:00	2.33333	2.33333	3.73333	1.4
2017-01-01	10:00:00	4.2	4.2	5.13333	1.86667
2017-01-01	11:00:00	4.2	5.13333	4.66667	7.93333
2017-01-01	12:00:00	7.46667	7	7	9.8
2017-01-01	13:00:00	8.4	8.86667	8.86667	12.6
2017-01-01	14:00:00	11.2	13.5333	9.8	24.7333
2017-01-01	15:00:00	28	24.2667	22.4	34.5333
2017-01-01	16:00:00	33.1333	33.6	27.5333	38.7333
2017-01-01	17:00:00	32.2	35	28	37.3333
2017-01-01	18:00:00	17.7333	19.6	13.0667	15.8667
2017-01-01	19:00:00	6.06667	12.6	4.66667	2.8
2017-01-01	20:00:00	5.13333	17.7333	3.73333	4.2
2017-01-01	21:00:00	5.6	16.3333	4.66667	7
2017-01-01	22:00:00	12.6	7.93333	5.13333	2.8
2017-01-01	23:00:00	8.86667	9.33333	3.73333	0.933333
2017-01-02	00:00:00	8.4	9.33333	3.26667	0.933333
2017-01-02	01:00:00	6.53333	5.6	2.33333	0.933333
2017-01-02	02:00:00	1.86667	4.2	2.8	1.4
2017-01-02	03:00:00	2.33333	1.86667	2.33333	0.933333
2017-01-02	04:00:00	1.86667	1.86667	2.33333	0.933333
2017-01-02	05:00:00	1.86667	1.4	2.33333	0.933333
2017-01-02	06:00:00	1.86667	1.4	2.33333	0.933333
2017-01-02	07:00:00	1.86667	1.4	2.8	0.933333
2017-01-02	08:00:00	2.33333	1.4	2.8	1.4
2017-01-02	09:00:00	3.73333	2.8	4.2	1.4
2017-01-02	10:00:00	6.06667	5.13333	6.06667	3.26667
2017-01-02	11:00:00	7.46667	7.46667	7	7.46667
2017-01-02	12:00:00	11.2	14.4667	11.6667	12.1333
2017-01-02	13:00:00	22.8667	26.1333	16.3333	22.8667
2017-01-02	14:00:00	26.1333	32.6667	25.6667	26.1333
2017-01-02	15:00:00	36.4	41.5333	30.8	31.2667
2017-01-02	16:00:00	32.2	31.7333	23.8	36.8667
2017-01-02	17:00:00	20.0667	25.2	17.7333	27.0667
2017-01-02	18:00:00	6.06667	17.7333	9.33333	14.9333
2017-01-02	19:00:00	4.2	15.8667	6.06667	4.66667
2017-01-02	20:00:00	5.13333	3.26667	7	1.86667
2017-01-02	21:00:00	3.26667	3.26667	4.2	1.4
2017-01-02	22:00:00	7	2.8	6.06667	0.933333
2017-01-02	23:00:00	4.2	3.73333	4.2	1.4
2017-01-03	00:00:00	3.26667	4.2	3.73333	1.4
2017-01-03	01:00:00	3.73333	2.8	3.26667	0.933333
2017-01-03	02:00:00	2.33333	2.33333	2.8	1.4
2017-01-03	03:00:00	1.86667	2.33333	2.8	1.4
2017-01-03	04:00:00	2.33333	2.33333	2.8	0.933333
2017-01-03	05:00:00	2.33333	2.33333	2.8	0.933333
2017-01-03	06:00:00	2.33333	2.33333	2.8	0.933333
2017-01-03	07:00:00	2.33333	2.33333	2.8	0.933333
2017-01-03	08:00:00	2.8	2.33333	2.8	1.4
2017-01-03	09:00:00	4.66667	3.26667	5.13333	1.86667
2017-01-03	10:00:00	4.2	5.13333	5.13333	2.33333
2017-01-03	11:00:00	5.6	5.6	4.66667	3.26667
2017-01-03	12:00:00	7	6.53333	5.6	7.46667
2017-01-03	13:00:00	13.5333	10.7333	7.93333	17.2667
2017-01-03	14:00:00	21	26.6	14.4667	22.8667
2017-01-03	15:00:00	26.6	27.5333	23.8	32.6667
2017-01-03	16:00:00	17.2667	—	19.6	22.4
2017-01-03	17:00:00	23.8	29.4	23.3333	20.5333
2017-01-03	18:00:00	13.5333	21	9.33333	22.8667
2017-01-03	19:00:00	4.2	11.6667	5.6	14
2017-01-03	20:00:00	6.06667	5.13333	7.46667	1.4
2017-01-03	21:00:00	11.6667	4.66667	8.86667	1.4
2017-01-03	22:00:00	5.13333	5.13333	6.53333	1.4
2017-01-03	23:00:00	4.2	6.53333	5.6	1.4
2017-01-04	00:00:00	2.8	5.13333	6.06667	1.4
2017-01-04	01:00:00	2.33333	2.8	6.06667	0.933333
2017-01-04	02:00:00	2.33333	2.33333	5.6	1.4
2017-01-04	03:00:00	2.33333	2.33333	5.13333	0.933333
2017-01-04	04:00:00	2.33333	2.33333	5.13333	0.933333
2017-01-04	05:00:00	1.86667	2.33333	4.66667	0.933333
2017-01-04	06:00:00	1.86667	2.33333	4.66667	0.933333
2017-01-04	07:00:00	2.33333	2.33333	5.13333	0.933333
2017-01-04	08:00:00	2.8	2.33333	5.13333	1.4
2017-01-04	09:00:00	4.2	3.26667	6.53333	1.4
2017-01-04	10:00:00	4.2	5.13333	7.46667	2.33333
2017-01-04	11:00:00	6.06667	6.53333	7.46667	3.73333
2017-01-04	12:00:00	7.46667	8.4	8.4	10.7333
2017-01-04	13:00:00	13.5333	16.3333	11.6667	18.2
2017-01-04	14:00:00	19.6	21.9333	14.9333	28
2017-01-04	15:00:00	30.3333	36.4	31.7333	25.6667
2017-01-04	16:00:00	—	43.4	39.2	40.1333
2017-01-04	17:00:00	25.6667	42.4667	36.8667	37.8
2017-01-04	18:00:00	15.8667	38.2667	21.9333	31.2667
2017-01-04	19:00:00	7.93333	32.2	8.86667	15.4
2017-01-04	20:00:00	10.2667	27.5333	7.46667	2.33333
2017-01-04	21:00:00	10.7333	22.8667	7	2.33333
2017-01-04	22:00:00	9.8	17.7333	6.53333	1.4
2017-01-04	23:00:00	5.13333	9.8	7	0.933333
2017-01-05	00:00:00	7.46667	8.86667	7.46667	0.933333
2017-01-05	01:00:00	2.33333	12.6	7	0.933333
2017-01-05	02:00:00	5.13333	18.6667	5.6	1.4
2017-01-05	03:00:00	3.73333	13.0667	5.13333	0.933333
2017-01-05	04:00:00	3.73333	3.26667	4.66667	0.933333
2017-01-05	05:00:00	2.33333	4.2	4.66667	0.933333
2017-01-05	06:00:00	2.33333	2.8	4.2	0.933333
2017-01-05	07:00:00	4.2	2.33333	5.13333	1.86667
2017-01-05	08:00:00	5.13333	2.33333	5.6	0.933333
2017-01-05	09:00:00	7.46667	2.33333	6.06667	1.4
2017-01-05	10:00:00	7.93333	4.2	7.46667	1.86667
2017-01-05	11:00:00	6.06667	10.2667	7.46667	3.26667
2017-01-05	12:00:00	12.6	19.6	9.33333	9.33333
2017-01-05	13:00:00	25.2	33.6	20.5333	—
2017-01-05	14:00:00	34.0667	39.2	35.9333	—
2017-01-05	15:00:00	38.2667	46.6667	38.2667	—
2017-01-05	16:00:00	39.6667	47.1333	38.2667	—
2017-01-05	17:00:00	34.5333	42.9333	34.0667	21.4667
2017-01-05	18:00:00	27.0667	37.8	27.0667	20.5333
2017-01-05	19:00:00	23.3333	32.2	21.4667	22.4
2017-01-05	20:00:00	21.4667	28.9333	19.1333	12.6
2017-01-05	21:00:00	21	29.4	19.6	14.4667
2017-01-05	22:00:00	27.5333	32.6667	17.2667	27.0667
2017-01-05	23:00:00	28	31.2667	21	29.4
2017-01-06	00:00:00	28.9333	31.7333	23.3333	28.9333
2017-01-06	01:00:00	28.9333	32.2	32.2	27.5333
2017-01-06	02:00:00	30.8	34.0667	34.0667	28
2017-01-06	03:00:00	31.7333	34.5333	35	28.9333
2017-01-06	04:00:00	31.7333	32.6667	33.1333	29.4
2017-01-06	05:00:00	22.8667	23.8	17.7333	23.8
2017-01-06	06:00:00	19.1333	21.9333	20.0667	6.06667
2017-01-06	07:00:00	14.9333	21	14.9333	11.6667
2017-01-06	08:00:00	7.46667	21.4667	14.4667	12.1333
2017-01-06	09:00:00	11.6667	17.7333	11.6667	10.2667
2017-01-06	10:00:00	12.6	17.7333	14	8.86667
2017-01-06	11:00:00	14	20.5333	14.4667	15.8667
2017-01-06	12:00:00	14.4667	20.5333	20.5333	18.6667
2017-01-06	13:00:00	15.8667	19.1333	18.2	19.1333
2017-01-06	14:00:00	19.6	22.8667	19.6	20.5333
2017-01-06	15:00:00	23.8	27.5333	28	24.2667
2017-01-06	16:00:00	22.8667	26.6	24.7333	25.6667
2017-01-06	17:00:00	20.0667	18.6667	21.4667	18.6667
2017-01-06	18:00:00	12.6	13.5333	13.5333	12.6
2017-01-06	19:00:00	8.4	10.7333	8.86667	5.6
2017-01-06	20:00:00	7.93333	8.4	10.2667	2.33333
2017-01-06	21:00:00	8.86667	7.46667	10.7333	1.4
2017-01-06	22:00:00	6.06667	3.73333	7.46667	3.26667
2017-01-06	23:00:00	20.5333	19.1333	21.4667	25.2
2017-01-07	00:00:00	23.8	26.6	28	26.1333
2017-01-07	01:00:00	23.8	26.6	26.6	24.7333
2017-01-07	02:00:00	22.8667	26.6	27.0667	22.4
2017-01-07	03:00:00	21.9333	23.8	26.6	21.9333
2017-01-07	04:00:00	21	23.3333	24.7333	19.6
2017-01-07	05:00:00	19.6	22.8667	22.8667	18.6667
2017-01-07	06:00:00	17.2667	21.9333	22.8667	13.5333
2017-01-07	07:00:00	12.6	19.6	16.3333	13.5333
2017-01-07	08:00:00	11.6667	16.8	14.9333	3.73333
2017-01-07	09:00:00	13.5333	16.3333	12.6	7.93333
2017-01-07	10:00:00	19.6	19.6	18.6667	22.4
2017-01-07	11:00:00	21.9333	20.5333	22.8667	24.2667
2017-01-07	12:00:00	25.2	23.3333	26.6	27.5333
2017-01-07	13:00:00	30.8	28.4667	31.2667	32.6667
2017-01-07	14:00:00	35.4667	34.5333	36.8667	35.9333
2017-01-07	15:00:00	37.8	36.8667	38.2667	38.2667
2017-01-07	16:00:00	40.1333	39.2	41.0667	38.7333
2017-01-07	17:00:00	37.3333	36.8667	36.8667	39.2
2017-01-07	18:00:00	26.1333	27.0667	28	21
2017-01-07	19:00:00	17.2667	17.2667	12.6	5.13333
2017-01-07	20:00:00	7.93333	15.8667	6.53333	2.33333
2017-01-07	21:00:00	3.26667	5.13333	6.06667	1.4
2017-01-07	22:00:00	6.06667	5.13333	5.6	1.4
2017-01-07	23:00:00	19.1333	19.6	7.93333	1.4
2017-01-08	00:00:00	9.8	20.0667	10.2667	2.33333
2017-01-08	01:00:00	6.06667	10.2667	10.2667	7.46667
2017-01-08	02:00:00	6.06667	4.2	4.2	7.46667
2017-01-08	03:00:00	4.2	3.26667	4.66667	2.33333
2017-01-08	04:00:00	2.8	5.6	4.2	0.933333
2017-01-08	05:00:00	3.73333	6.53333	5.6	0.933333
2017-01-08	06:00:00	3.73333	8.86667	4.66667	0.933333
2017-01-08	07:00:00	5.13333	9.8	5.13333	2.33333
2017-01-08	08:00:00	2.33333	2.8	4.2	1.4
2017-01-08	09:00:00	6.06667	4.2	7	2.33333
2017-01-08	10:00:00	9.8	10.7333	10.7333	7.46667
2017-01-08	11:00:00	12.6	14.4667	12.1333	18.6667
2017-01-08	12:00:00	16.3333	16.3333	18.6667	25.2
2017-01-08	13:00:00	22.8667	22.8667	26.6	34.0667
2017-01-08	14:00:00	34.0667	33.1333	35	36.4
2017-01-08	15:00:00	37.3333	38.2667	37.8	39.6667
2017-01-08	16:00:00	38.2667	39.2	38.2667	41.0667
2017-01-08	17:00:00	36.8667	37.3333	37.3333	40.6
2017-01-08	18:00:00	20.5333	24.7333	26.6	16.3333
2017-01-08	19:00:00	8.4	11.6667	9.33333	8.4
2017-01-08	20:00:00	12.6	22.4	13.5333	19.6
2017-01-08	21:00:00	12.6	22.8667	15.8667	14.4667
2017-01-08	22:00:00	12.6	21	8.86667	14
2017-01-08	23:00:00	6.06667	11.6667	11.6667	5.6
2017-01-09	00:00:00	6.53333	11.2	5.6	13.0667
2017-01-09	01:00:00	17.7333	15.4	15.4	7
2017-01-09	02:00:00	13.5333	20.5333	9.8	1.4
2017-01-09	03:00:00	3.73333	12.6	5.6	1.86667
2017-01-09	04:00:00	2.33333	7.93333	6.06667	2.33333
2017-01-09	05:00:00	7.93333	12.1333	7	7.46667
2017-01-09	06:00:00	10.2667	16.3333	8.4	10.2667
2017-01-09	07:00:00	8.4	14	11.2	7
2017-01-09	08:00:00	4.66667	6.06667	7.46667	2.33333
2017-01-09	09:00:00	7.93333	6.53333	8.4	7
2017-01-09	10:00:00	11.6667	8.86667	8.86667	11.6667
2017-01-09	11:00:00	12.1333	12.1333	12.6	16.8
2017-01-09	12:00:00	15.8667	14.9333	17.7333	21.9333
2017-01-09	13:00:00	20.0667	19.1333	22.8667	25.6667
2017-01-09	14:00:00	29.4	27.0667	28	32.6667
2017-01-09	15:00:00	34.0667	33.6	34.0667	36.4
2017-01-09	16:00:00	34.0667	35	35.4667	37.3333
2017-01-09	17:00:00	34.0667	35.4667	36.4	38.2667
2017-01-09	18:00:00	27.5333	28.9333	26.6	21.4667
2017-01-09	19:00:00	11.2	13.5333	13.0667	1.4
2017-01-09	20:00:00	7.46667	12.6	6.53333	2.8
2017-01-09	21:00:00	4.66667	6.53333	6.06667	0.933333
2017-01-09	22:00:00	2.8	6.06667	6.06667	1.4
2017-01-09	23:00:00	5.13333	8.4	5.13333	2.33333
2017-01-10	00:00:00	4.66667	12.1333	4.66667	3.73333
2017-01-10	01:00:00	7.46667	12.6	5.13333	12.1333
2017-01-10	02:00:00	12.1333	16.3333	7.93333	13.5333
2017-01-10	03:00:00	14.9333	20.5333	14	7.46667
2017-01-10	04:00:00	16.8	21.4667	17.7333	8.4
2017-01-10	05:00:00	17.2667	20.0667	17.2667	12.6
2017-01-10	06:00:00	12.6	16.8	14.4667	9.33333
2017-01-10	07:00:00	9.33333	12.6	7.46667	11.2
2017-01-10	08:00:00	6.53333	7.93333	5.13333	3.73333
2017-01-10	09:00:00	7.46667	7.46667	7.46667	4.66667
2017-01-10	10:00:00	10.7333	11.2	10.2667	12.1333
2017-01-10	11:00:00	12.6	12.6	12.1333	12.1333
2017-01-10	12:00:00	13.0667	12.6	14.9333	18.2
2017-01-10	13:00:00	21.4667	21.4667	22.8667	23.3333
2017-01-10	14:00:00	30.8	—	29.4	33.1333
2017-01-10	15:00:00	34.5333	31.7333	33.6	37.8
2017-01-10	16:00:00	38.2667	34.5333	37.3333	41.5333
2017-01-10	17:00:00	35.9333	37.3333	—	39.2
2017-01-10	18:00:00	24.7333	30.3333	26.6	20.0667
2017-01-10	19:00:00	8.86667	14	9.8	1.86667
2017-01-10	20:00:00	7	7.93333	7.46667	4.66667
2017-01-10	21:00:00	7	6.06667	8.4	2.33333
2017-01-10	22:00:00	7	3.26667	6.06667	1.4
2017-01-10	23:00:00	4.2	2.8	6.06667	1.86667
2017-01-11	00:00:00	6.06667	3.26667	6.06667	1.4
2017-01-11	01:00:00	3.26667	3.73333	5.6	1.4
2017-01-11	02:00:00	2.33333	2.33333	5.6	1.86667
2017-01-11	03:00:00	2.33333	2.33333	5.13333	1.4
2017-01-11	04:00:00	2.33333	6.53333	4.66667	1.86667
2017-01-11	05:00:00	2.33333	7	5.13333	1.4
2017-01-11	06:00:00	2.33333	5.13333	5.13333	1.4
2017-01-11	07:00:00	2.33333	6.06667	5.6	1.4
2017-01-11	08:00:00	2.33333	3.73333	5.13333	1.4
2017-01-11	09:00:00	4.2	4.2	5.6	1.86667
2017-01-11	10:00:00	5.6	6.53333	7.46667	2.33333
2017-01-11	11:00:00	6.53333	10.2667	9.33333	10.2667
2017-01-11	12:00:00	12.1333	20.0667	12.6	12.1333
2017-01-11	13:00:00	29.4	31.2667	29.8667	32.6667
2017-01-11	14:00:00	36.4	38.2667	36.4	38.2667
2017-01-11	15:00:00	37.8	38.7333	37.3333	38.7333
2017-01-11	16:00:00	36.8667	37.8	37.8	39.2
2017-01-11	17:00:00	33.1333	36.4	33.1333	36.4
2017-01-11	18:00:00	—	33.1333	28.9333	28.9333
2017-01-11	19:00:00	21	28	15.8667	22.4
2017-01-11	20:00:00	14.9333	25.6667	12.6	10.2667
2017-01-11	21:00:00	14.9333	24.2667	7.93333	7.46667
2017-01-11	22:00:00	13.5333	23.3333	10.2667	4.2
2017-01-11	23:00:00	14	24.2667	10.7333	1.86667
2017-01-12	00:00:00	16.8	21	7.46667	1.4
2017-01-12	01:00:00	9.33333	18.2	4.66667	1.4
2017-01-12	02:00:00	9.8	17.2667	5.13333	2.33333
2017-01-12	03:00:00	5.13333	11.2	5.13333	1.4
2017-01-12	04:00:00	7.46667	7	7.46667	1.4
2017-01-12	05:00:00	11.6667	14.4667	11.6667	1.4
2017-01-12	06:00:00	5.13333	11.6667	4.2	1.4
2017-01-12	07:00:00	2.33333	7	5.6	1.4
2017-01-12	08:00:00	3.73333	7.46667	5.13333	1.4
2017-01-12	09:00:00	6.53333	6.53333	8.4	3.26667
2017-01-12	10:00:00	7.46667	14	11.2	12.6
2017-01-12	11:00:00	13.5333	14.4667	14.4667	16.3333
2017-01-12	12:00:00	17.7333	18.6667	17.7333	20.0667
2017-01-12	13:00:00	29.4	32.6667	28	38.2667
2017-01-12	14:00:00	37.8	38.7333	37.8	38.7333
2017-01-12	15:00:00	37.8	38.7333	37.3333	38.7333
2017-01-12	16:00:00	37.3333	38.7333	36.8667	37.8
2017-01-12	17:00:00	35.4667	37.8	34.0667	37.3333
2017-01-12	18:00:00	21.4667	30.8	19.1333	21.4667
2017-01-12	19:00:00	12.6	22.4	8.4	7.46667
2017-01-12	20:00:00	10.7333	22.8667	7.46667	5.6
2017-01-12	21:00:00	10.7333	18.6667	7.46667	3.26667
2017-01-12	22:00:00	10.2667	15.4	7.93333	2.33333
2017-01-12	23:00:00	6.06667	10.7333	5.6	1.4
2017-01-13	00:00:00	5.13333	3.73333	6.06667	1.4
2017-01-13	01:00:00	7.46667	2.8	5.13333	1.86667
2017-01-13	02:00:00	3.73333	4.66667	4.2	2.33333
2017-01-13	03:00:00	2.33333	3.73333	4.2	1.86667
2017-01-13	04:00:00	2.33333	3.26667	4.2	1.86667
2017-01-13	05:00:00	3.26667	6.06667	5.13333	0.933333
2017-01-13	06:00:00	3.73333	2.8	5.6	0.933333
2017-01-13	07:00:00	2.33333	2.33333	4.66667	0.933333
2017-01-13	08:00:00	1.86667	1.86667	5.13333	1.86667
2017-01-13	09:00:00	3.26667	2.8	6.06667	2.33333
2017-01-13	10:00:00	6.53333	5.6	7.46667	4.66667
2017-01-13	11:00:00	10.7333	9.33333	10.2667	7.46667
2017-01-13	12:00:00	15.4	15.4	17.7333	24.7333
2017-01-13	13:00:00	22.8667	18.2	25.2	32.2
2017-01-13	14:00:00	25.6667	27.0667	28.4667	29.8667
2017-01-13	15:00:00	24.2667	32.2	28.4667	28
2017-01-13	16:00:00	24.2667	32.2	26.6	28.4667
2017-01-13	17:00:00	22.8667	27.0667	22.8667	24.7333
2017-01-13	18:00:00	12.6	20.0667	11.6667	14.9333
2017-01-13	19:00:00	4.2	21.4667	7.93333	2.33333
2017-01-13	20:00:00	6.06667	5.6	7.46667	1.4
2017-01-13	21:00:00	4.2	6.06667	6.53333	1.86667
2017-01-13	22:00:00	4.2	7	7	1.4
2017-01-13	23:00:00	7.46667	5.13333	7	1.4
2017-01-14	00:00:00	4.2	4.2	6.53333	1.4
2017-01-14	01:00:00	2.8	4.66667	5.13333	1.4
2017-01-14	02:00:00	2.33333	4.2	4.66667	1.86667
2017-01-14	03:00:00	2.33333	3.26667	5.13333	1.4
2017-01-14	04:00:00	1.86667	2.33333	5.13333	1.4
2017-01-14	05:00:00	1.86667	2.33333	5.13333	1.4
2017-01-14	06:00:00	1.86667	2.33333	4.66667	1.4
2017-01-14	07:00:00	1.86667	2.33333	5.13333	1.4
2017-01-14	08:00:00	2.33333	2.33333	4.66667	1.4
2017-01-14	09:00:00	2.33333	2.8	5.6	1.86667
2017-01-14	10:00:00	5.13333	5.13333	7	3.73333
2017-01-14	11:00:00	7.46667	6.06667	9.33333	5.13333
2017-01-14	12:00:00	8.86667	14	10.7333	12.1333
2017-01-14	13:00:00	12.6	13.0667	12.1333	14
2017-01-14	14:00:00	11.2	16.3333	14.9333	17.7333
2017-01-14	15:00:00	19.6	21	22.8667	18.6667
2017-01-14	16:00:00	22.4	25.2	26.1333	21.4667
2017-01-14	17:00:00	20.0667	24.7333	19.1333	20.0667
2017-01-14	18:00:00	10.7333	19.1333	14	16.8
2017-01-14	19:00:00	6.06667	16.3333	7.46667	2.8
2017-01-14	20:00:00	3.73333	16.3333	7	1.4
2017-01-14	21:00:00	3.26667	10.2667	6.53333	1.4
2017-01-14	22:00:00	4.66667	5.6	6.53333	1.4
2017-01-14	23:00:00	7.46667	4.66667	7	1.4
2017-01-15	00:00:00	7	5.13333	6.06667	1.4
2017-01-15	01:00:00	7	3.26667	7	1.4
2017-01-15	02:00:00	2.8	2.8	5.13333	1.4
2017-01-15	03:00:00	2.33333	7.46667	5.13333	1.4
2017-01-15	04:00:00	2.33333	19.1333	5.13333	1.4
2017-01-15	05:00:00	2.8	11.6667	5.13333	1.4
2017-01-15	06:00:00	2.33333	10.7333	5.6	1.4
2017-01-15	07:00:00	2.33333	7.46667	6.06667	1.4
2017-01-15	08:00:00	2.33333	3.26667	7.46667	1.4
2017-01-15	09:00:00	4.2	4.66667	7	1.4
2017-01-15	10:00:00	4.66667	10.2667	7	1.86667
2017-01-15	11:00:00	8.4	14.4667	7.46667	3.26667
2017-01-15	12:00:00	12.1333	15.8667	13.5333	12.1333
2017-01-15	13:00:00	17.7333	19.6	18.2	20.5333
2017-01-15	14:00:00	14	14.9333	15.4	21
2017-01-15	15:00:00	15.8667	20.0667	18.2	17.7333
2017-01-15	16:00:00	17.7333	22.8667	20.0667	24.7333
2017-01-15	17:00:00	13.5333	21.9333	18.6667	22.4
2017-01-15	18:00:00	9.8	17.2667	12.1333	12.6
2017-01-15	19:00:00	4.2	13.0667	8.86667	7.46667
2017-01-15	20:00:00	5.13333	13.0667	7.93333	2.33333
2017-01-15	21:00:00	2.8	7	6.06667	1.86667
2017-01-15	22:00:00	2.8	4.66667	5.6	1.4
2017-01-15	23:00:00	3.26667	2.8	5.13333	1.4
2017-01-16	00:00:00	2.33333	2.8	4.66667	1.4
2017-01-16	01:00:00	1.86667	2.8	5.13333	1.4
2017-01-16	02:00:00	1.86667	3.73333	4.66667	1.4
2017-01-16	03:00:00	1.86667	2.33333	4.2	0.933333
2017-01-16	04:00:00	1.86667	2.33333	4.66667	1.4
2017-01-16	05:00:00	2.8	2.33333	4.2	0.933333
2017-01-16	06:00:00	2.33333	2.33333	4.66667	1.4
2017-01-16	07:00:00	1.86667	2.33333	5.13333	1.4
2017-01-16	08:00:00	2.33333	2.33333	5.13333	1.4
2017-01-16	09:00:00	3.26667	3.73333	6.53333	1.86667
2017-01-16	10:00:00	7	8.86667	7	4.66667
2017-01-16	11:00:00	12.6	17.2667	13.5333	20.5333
2017-01-16	12:00:00	27.5333	28	27.0667	33.6
2017-01-16	13:00:00	34.0667	35.4667	34.5333	37.8
2017-01-16	14:00:00	40.1333	40.1333	39.6667	42
2017-01-16	15:00:00	41.0667	40.6	39.6667	42.9333
2017-01-16	16:00:00	40.6	41.5333	39.2	42.4667
2017-01-16	17:00:00	37.8	38.2667	34.5333	40.1333
2017-01-16	18:00:00	33.1333	29.8667	—	38.2667
2017-01-16	19:00:00	15.8667	24.2667	17.2667	10.7333
2017-01-16	20:00:00	10.7333	23.3333	11.2	9.33333
2017-01-16	21:00:00	15.8667	20.0667	18.6667	7.46667
2017-01-16	22:00:00	10.2667	13.0667	11.6667	6.06667
2017-01-16	23:00:00	2.33333	5.13333	7	1.86667
2017-01-17	00:00:00	5.13333	2.8	6.06667	1.86667
2017-01-17	01:00:00	12.6	2.33333	5.13333	1.4
2017-01-17	02:00:00	3.73333	4.66667	5.13333	1.4
2017-01-17	03:00:00	2.33333	2.33333	4.66667	1.4
2017-01-17	04:00:00	2.33333	1.86667	4.66667	0.933333
2017-01-17	05:00:00	3.73333	2.33333	4.2	0.933333
2017-01-17	06:00:00	1.86667	2.33333	4.2	0.933333
2017-01-17	07:00:00	1.4	1.86667	4.66667	0.933333
2017-01-17	08:00:00	2.33333	1.86667	5.13333	1.4
2017-01-17	09:00:00	4.66667	3.26667	6.06667	1.86667
2017-01-17	10:00:00	6.53333	7	7.46667	6.53333
2017-01-17	11:00:00	12.6	11.2	12.6	12.6
2017-01-17	12:00:00	28.9333	27.5333	26.6	29.8667
2017-01-17	13:00:00	33.1333	32.2	33.6	36.8667
2017-01-17	14:00:00	37.8	34.5333	37.3333	39.2
2017-01-17	15:00:00	38.2667	37.8	38.2667	39.6667
2017-01-17	16:00:00	38.2667	36.8667	37.8	41.5333
2017-01-17	17:00:00	37.8	37.3333	36.4	42.4667
2017-01-17	18:00:00	32.2	34.5333	30.3333	29.8667
2017-01-17	19:00:00	14	17.2667	16.3333	3.73333
2017-01-17	20:00:00	5.6	14.4667	8.86667	1.86667
2017-01-17	21:00:00	8.4	7.93333	8.4	1.86667
2017-01-17	22:00:00	5.13333	2.8	7	1.4
2017-01-17	23:00:00	5.13333	2.33333	6.06667	1.4
2017-01-18	00:00:00	3.26667	2.8	6.53333	1.4
2017-01-18	01:00:00	2.33333	4.2	5.6	1.4
2017-01-18	02:00:00	2.33333	2.8	4.66667	1.4
2017-01-18	03:00:00	2.33333	2.33333	4.66667	1.4
2017-01-18	04:00:00	1.86667	2.33333	4.66667	0.933333
2017-01-18	05:00:00	1.86667	2.33333	4.66667	1.4
2017-01-18	06:00:00	1.86667	1.86667	4.66667	1.4
2017-01-18	07:00:00	1.86667	1.86667	4.66667	0.933333
2017-01-18	08:00:00	1.86667	2.33333	4.66667	1.4
2017-01-18	09:00:00	2.33333	3.26667	5.6	1.86667
2017-01-18	10:00:00	4.66667	5.13333	7	3.26667
2017-01-18	11:00:00	6.53333	6.53333	7.93333	8.4
2017-01-18	12:00:00	9.33333	10.2667	10.7333	16.8
2017-01-18	13:00:00	24.2667	28	23.8	27.0667
2017-01-18	14:00:00	28.9333	31.7333	29.4	34.0667
2017-01-18	15:00:00	28	32.2	33.1333	31.7333
2017-01-18	16:00:00	27.5333	32.6667	32.6667	31.2667
2017-01-18	17:00:00	—	31.2667	29.4	29.4
2017-01-18	18:00:00	11.2	24.2667	19.1333	21.4667
2017-01-18	19:00:00	4.2	21	10.7333	5.13333
2017-01-18	20:00:00	3.26667	16.3333	7	1.86667
2017-01-18	21:00:00	3.26667	4.2	6.06667	1.86667
2017-01-18	22:00:00	3.26667	8.4	5.6	1.86667
2017-01-18	23:00:00	7.46667	16.8	6.06667	2.33333
2017-01-19	00:00:00	18.2	28.9333	21.4667	28
2017-01-19	01:00:00	33.1333	35.4667	36.4	35.9333
2017-01-19	02:00:00	33.1333	35	36.4	35
2017-01-19	03:00:00	33.1333	34.0667	36.4	34.0667
2017-01-19	04:00:00	34.0667	35.9333	36.4	35
2017-01-19	05:00:00	32.6667	35	35	33.1333
2017-01-19	06:00:00	28.9333	31.2667	32.2	30.3333
2017-01-19	07:00:00	22.8667	26.6	28	28
2017-01-19	08:00:00	21	23.8	24.2667	25.6667
2017-01-19	09:00:00	24.2667	27.5333	28	28.4667
2017-01-19	10:00:00	28.9333	30.8	29.8667	33.1333
2017-01-19	11:00:00	31.7333	33.1333	32.2	35
2017-01-19	12:00:00	33.1333	35	35	35.9333
2017-01-19	13:00:00	34.5333	35.9333	36.8667	37.8
2017-01-19	14:00:00	35.9333	37.3333	38.2667	39.2
2017-01-19	15:00:00	36.8667	38.2667	38.2667	39.2
2017-01-19	16:00:00	36.4	35.9333	37.8	39.2
2017-01-19	17:00:00	34.0667	34.0667	35.9333	38.2667
2017-01-19	18:00:00	29.8667	29.4	31.7333	34.0667
2017-01-19	19:00:00	21.4667	27.0667	20.0667	12.6
2017-01-19	20:00:00	10.7333	14.9333	9.33333	2.8
2017-01-19	21:00:00	5.6	8.4	7	1.4
2017-01-19	22:00:00	7	3.73333	5.13333	1.86667
2017-01-19	23:00:00	9.8	3.73333	5.6	1.86667
2017-01-20	00:00:00	2.8	2.8	5.6	1.4
2017-01-20	01:00:00	2.33333	2.33333	5.13333	1.4
2017-01-20	02:00:00	1.86667	2.8	4.66667	1.4
2017-01-20	03:00:00	2.33333	3.26667	5.13333	1.4
2017-01-20	04:00:00	1.4	2.33333	5.13333	1.4
2017-01-20	05:00:00	1.86667	1.86667	5.13333	1.4
2017-01-20	06:00:00	1.4	1.86667	5.13333	1.4
2017-01-20	07:00:00	1.4	2.33333	4.2	1.4
2017-01-20	08:00:00	1.86667	2.33333	4.66667	1.4
2017-01-20	09:00:00	3.73333	3.73333	6.06667	2.33333
2017-01-20	10:00:00	6.53333	6.53333	7.46667	3.73333
2017-01-20	11:00:00	10.7333	16.8	10.2667	7.93333
2017-01-20	12:00:00	22.8667	25.2	17.7333	27.0667
2017-01-20	13:00:00	27.5333	28.9333	28	31.7333
2017-01-20	14:00:00	28	31.2667	31.2667	30.8
2017-01-20	15:00:00	30.3333	33.1333	33.1333	32.2
2017-01-20	16:00:00	30.3333	35	29.8667	32.6667
2017-01-20	17:00:00	23.8	30.3333	21	28.9333
2017-01-20	18:00:00	15.8667	25.2	19.6	25.2
2017-01-20	19:00:00	11.2	24.7333	15.8667	16.8
2017-01-20	20:00:00	7.93333	21	7.93333	2.33333
2017-01-20	21:00:00	4.2	12.6	9.33333	2.33333
2017-01-20	22:00:00	6.06667	9.8	6.06667	6.53333
2017-01-20	23:00:00	4.2	7.46667	6.53333	1.4
2017-01-21	00:00:00	2.33333	2.33333	6.06667	1.4
2017-01-21	01:00:00	2.33333	2.33333	5.6	1.4
2017-01-21	02:00:00	2.33333	2.33333	5.13333	1.4
2017-01-21	03:00:00	2.33333	4.2	5.13333	1.4
2017-01-21	04:00:00	6.06667	17.7333	4.66667	1.4
2017-01-21	05:00:00	10.2667	28.4667	9.8	5.13333
2017-01-21	06:00:00	19.6	29.8667	21	29.4
2017-01-21	07:00:00	17.2667	28	21	8.86667
2017-01-21	08:00:00	8.86667	18.6667	15.8667	7.46667
2017-01-21	09:00:00	12.6	20.5333	17.2667	13.5333
2017-01-21	10:00:00	21	22.8667	21.4667	28
2017-01-21	11:00:00	28.9333	30.3333	28.4667	34.0667
2017-01-21	12:00:00	32.6667	32.6667	33.1333	36.8667
2017-01-21	13:00:00	35	36.4	35.9333	38.7333
2017-01-21	14:00:00	36.8667	37.8	37.8	39.6667
2017-01-21	15:00:00	37.8	38.7333	38.2667	41.0667
2017-01-21	16:00:00	37.8	39.2	38.2667	41.5333
2017-01-21	17:00:00	36.8667	38.7333	38.7333	42
2017-01-21	18:00:00	33.1333	34.0667	31.2667	36.4
2017-01-21	19:00:00	26.6	24.7333	22.8667	15.4
2017-01-21	20:00:00	7.46667	7.46667	9.8	2.8
2017-01-21	21:00:00	7.46667	8.86667	7.46667	4.66667
2017-01-21	22:00:00	7.46667	6.06667	7.46667	1.4
2017-01-21	23:00:00	3.26667	3.26667	6.53333	1.4
2017-01-22	00:00:00	2.33333	3.73333	5.13333	1.86667
2017-01-22	01:00:00	2.33333	2.33333	5.13333	1.86667
2017-01-22	02:00:00	2.33333	2.33333	6.06667	1.4
2017-01-22	03:00:00	1.86667	2.33333	5.13333	1.4
2017-01-22	04:00:00	1.86667	2.33333	5.13333	1.4
2017-01-22	05:00:00	1.86667	2.33333	4.66667	1.4
2017-01-22	06:00:00	1.4	2.33333	4.2	1.4
2017-01-22	07:00:00	1.4	2.33333	4.2	1.4
2017-01-22	08:00:00	2.33333	2.33333	5.13333	1.4
2017-01-22	09:00:00	2.8	3.73333	6.53333	2.33333
2017-01-22	10:00:00	5.6	5.6	7.46667	4.2
2017-01-22	11:00:00	6.53333	7.46667	9.8	10.7333
2017-01-22	12:00:00	9.33333	14	12.6	14
2017-01-22	13:00:00	16.8	20.5333	15.8667	18.6667
2017-01-22	14:00:00	22.4	28	21.4667	25.6667
2017-01-22	15:00:00	31.7333	35	34.5333	33.1333
2017-01-22	16:00:00	29.8667	35.4667	30.3333	35.9333
2017-01-22	17:00:00	29.8667	36.4	29.8667	37.3333
2017-01-22	18:00:00	22.4	33.1333	22.8667	32.6667
2017-01-22	19:00:00	7.93333	27.5333	12.6	14
2017-01-22	20:00:00	4.66667	8.86667	9.8	7.46667
2017-01-22	21:00:00	7.46667	7.46667	8.4	2.33333
2017-01-22	22:00:00	7	7.46667	8.4	1.86667
2017-01-22	23:00:00	6.53333	7.46667	7.46667	1.4
2017-01-23	00:00:00	3.73333	4.2	5.6	1.4
2017-01-23	01:00:00	1.86667	5.6	4.66667	1.4
2017-01-23	02:00:00	1.86667	4.2	5.13333	1.4
2017-01-23	03:00:00	1.86667	3.26667	5.13333	1.4
2017-01-23	04:00:00	1.4	3.26667	4.66667	1.4
2017-01-23	05:00:00	1.4	2.33333	4.2	1.4
2017-01-23	06:00:00	1.4	2.33333	4.66667	1.4
2017-01-23	07:00:00	1.4	2.33333	4.66667	1.4
2017-01-23	08:00:00	1.86667	2.33333	4.66667	1.4
2017-01-23	09:00:00	2.8	3.26667	6.06667	2.33333
2017-01-23	10:00:00	4.2	6.53333	7.46667	5.6
2017-01-23	11:00:00	6.53333	9.33333	8.86667	14
2017-01-23	12:00:00	14.9333	28	13.5333	26.1333
2017-01-23	13:00:00	35.4667	36.4	20.5333	30.8
2017-01-23	14:00:00	29.4	29.8667	21	44.3333
2017-01-23	15:00:00	18.6667	32.6667	19.6	44.8
2017-01-23	16:00:00	26.6	35	19.6	38.2667
2017-01-23	17:00:00	29.4	33.6	28.9333	33.1333
2017-01-23	18:00:00	17.7333	23.3333	20.0667	29.8667
2017-01-23	19:00:00	8.86667	11.6667	9.8	2.33333
2017-01-23	20:00:00	7	7.46667	9.8	2.33333
2017-01-23	21:00:00	10.2667	7.46667	9.8	1.86667
2017-01-23	22:00:00	6.06667	4.66667	7.46667	1.4
2017-01-23	23:00:00	2.8	5.13333	5.6	1.4
2017-01-24	00:00:00	1.4	5.6	5.13333	1.86667
2017-01-24	01:00:00	1.86667	3.26667	5.6	1.4
2017-01-24	02:00:00	1.4	2.33333	4.66667	1.4
2017-01-24	03:00:00	1.86667	2.8	4.66667	0.933333
2017-01-24	04:00:00	2.33333	2.33333	4.2	0.933333
2017-01-24	05:00:00	2.33333	2.33333	4.2	1.4
2017-01-24	06:00:00	1.4	2.33333	4.2	2.33333
2017-01-24	07:00:00	1.4	1.86667	4.66667	1.4
2017-01-24	08:00:00	1.86667	2.33333	4.2	1.4
2017-01-24	09:00:00	2.8	3.26667	5.6	2.33333
2017-01-24	10:00:00	5.13333	6.06667	7.46667	7
2017-01-24	11:00:00	8.4	8.86667	10.7333	13.5333
2017-01-24	12:00:00	8.4	12.1333	12.6	14.4667
2017-01-24	13:00:00	14.4667	23.8	14.9333	21.4667
2017-01-24	14:00:00	29.8667	36.8667	23.3333	34.5333
2017-01-24	15:00:00	32.2	39.6667	28.9333	34.5333
2017-01-24	16:00:00	36.4	43.8667	35	36.4
2017-01-24	17:00:00	35	42.4667	—	40.6
2017-01-24	18:00:00	17.2667	38.7333	26.1333	34.0667
2017-01-24	19:00:00	6.53333	36.8667	7.46667	7.93333
2017-01-24	20:00:00	4.66667	28	7.46667	3.26667
2017-01-24	21:00:00	6.06667	5.6	8.4	1.86667
2017-01-24	22:00:00	10.7333	4.66667	7.46667	3.26667
2017-01-24	23:00:00	5.6	6.06667	5.6	7.46667
2017-01-25	00:00:00	6.06667	8.4	6.06667	2.33333
2017-01-25	01:00:00	5.13333	7	4.66667	1.86667
2017-01-25	02:00:00	2.8	16.8	4.66667	1.86667
2017-01-25	03:00:00	1.86667	6.53333	4.66667	1.4
2017-01-25	04:00:00	0.933333	3.73333	4.2	1.4
2017-01-25	05:00:00	0.933333	2.33333	3.73333	1.4
2017-01-25	06:00:00	0.933333	3.26667	4.2	1.4
2017-01-25	07:00:00	1.4	3.73333	4.66667	0.933333
2017-01-25	08:00:00	2.33333	3.73333	4.66667	1.4
2017-01-25	09:00:00	2.33333	5.6	5.6	2.8
2017-01-25	10:00:00	5.13333	10.7333	7.46667	5.6
2017-01-25	11:00:00	8.86667	25.6667	8.4	12.6
2017-01-25	12:00:00	22.8667	36.4	23.3333	24.2667
2017-01-25	13:00:00	32.2	43.4	33.6	30.3333
2017-01-25	14:00:00	—	48.5333	33.1333	43.8667
2017-01-25	15:00:00	43.4	53.6667	41.0667	48.0667
2017-01-25	16:00:00	45.7333	55.5333	43.8667	49.4667
2017-01-25	17:00:00	43.8667	56.4667	45.2667	44.8
2017-01-25	18:00:00	30.3333	53.2	38.7333	42.4667
2017-01-25	19:00:00	37.3333	50.8667	31.2667	37.3333
2017-01-25	20:00:00	35.9333	49	27.5333	33.1333
2017-01-25	21:00:00	34.5333	48.5333	28	28
2017-01-25	22:00:00	34.5333	45.2667	29.8667	33.1333
2017-01-25	23:00:00	30.8	45.2667	27.0667	32.6667
2017-01-26	00:00:00	30.8	41.5333	27.5333	32.6667
2017-01-26	01:00:00	32.6667	36.4	35	33.6
2017-01-26	02:00:00	28.9333	30.8	30.3333	30.8
2017-01-26	03:00:00	29.8667	32.2	32.6667	32.6667
2017-01-26	04:00:00	32.6667	33.6	33.1333	33.1333
2017-01-26	05:00:00	31.2667	34.5333	33.1333	33.1333
2017-01-26	06:00:00	28	30.3333	30.3333	31.7333
2017-01-26	07:00:00	24.7333	28	26.1333	30.3333
2017-01-26	08:00:00	24.7333	28	17.7333	27.0667
2017-01-26	09:00:00	28	29.8667	26.1333	33.1333
2017-01-26	10:00:00	31.7333	32.2	33.1333	35.4667
2017-01-26	11:00:00	33.1333	34.5333	34.5333	35.9333
2017-01-26	12:00:00	35	36.8667	35.9333	37.3333
2017-01-26	13:00:00	36.4	37.8	36.8667	37.8
2017-01-26	14:00:00	36.4	37.8	37.8	38.2667
2017-01-26	15:00:00	38.2667	39.2	38.2667	39.6667
2017-01-26	16:00:00	37.8	39.6667	38.2667	40.1333
2017-01-26	17:00:00	37.8	39.2	37.8	39.2
2017-01-26	18:00:00	34.5333	37.3333	33.6	39.6667
2017-01-26	19:00:00	27.0667	32.6667	27.5333	35.9333
2017-01-26	20:00:00	23.3333	28.4667	25.6667	33.6
2017-01-26	21:00:00	21.9333	19.6	23.3333	27.5333
2017-01-26	22:00:00	24.2667	26.1333	26.1333	25.6667
2017-01-26	23:00:00	20.5333	20.5333	21	18.2
2017-01-27	00:00:00	14.4667	19.1333	14	17.2667
2017-01-27	01:00:00	10.2667	21.4667	16.3333	21
2017-01-27	02:00:00	7.93333	16.3333	17.7333	12.1333
2017-01-27	03:00:00	8.4	5.13333	9.33333	10.7333
2017-01-27	04:00:00	9.8	5.13333	10.7333	14
2017-01-27	05:00:00	10.7333	6.53333	11.6667	12.6
2017-01-27	06:00:00	8.4	9.8	10.2667	13.0667
2017-01-27	07:00:00	6.06667	9.8	7.93333	12.6
2017-01-27	08:00:00	4.66667	2.33333	6.06667	10.2667
2017-01-27	09:00:00	5.6	5.13333	7	8.86667
2017-01-27	10:00:00	7.93333	11.2	8.86667	15.8667
2017-01-27	11:00:00	12.6	17.7333	12.1333	17.2667
2017-01-27	12:00:00	24.2667	28	21.4667	24.7333
2017-01-27	13:00:00	32.6667	35.4667	31.2667	35
2017-01-27	14:00:00	32.6667	35.9333	33.1333	37.3333
2017-01-27	15:00:00	33.6	37.8	36.4	37.3333
2017-01-27	16:00:00	32.2	38.2667	35.9333	37.3333
2017-01-27	17:00:00	34.0667	38.7333	33.1333	36.4
2017-01-27	18:00:00	31.7333	38.2667	27.5333	30.3333
2017-01-27	19:00:00	28.9333	38.2667	22.8667	30.3333
2017-01-27	20:00:00	18.6667	37.8	22.4	21.9333
2017-01-27	21:00:00	27.5333	39.2	25.2	18.2
2017-01-27	22:00:00	32.2	40.1333	28.9333	17.2667
2017-01-27	23:00:00	31.7333	39.2	28.4667	17.2667
2017-01-28	00:00:00	29.4	38.7333	28	29.4
2017-01-28	01:00:00	29.4	37.8	16.3333	28.9333
2017-01-28	02:00:00	31.7333	37.8	29.4	29.4
2017-01-28	03:00:00	33.1333	37.3333	31.2667	20.5333
2017-01-28	04:00:00	31.7333	35.9333	29.4	17.7333
2017-01-28	05:00:00	28	34.5333	29.8667	26.1333
2017-01-28	06:00:00	25.2	29.4	28.4667	22.8667
2017-01-28	07:00:00	17.7333	24.7333	20.5333	21.4667
2017-01-28	08:00:00	5.13333	22.4	13.0667	13.0667
2017-01-28	09:00:00	9.8	16.3333	7.93333	12.6
2017-01-28	10:00:00	11.2	20.0667	11.2	15.4
2017-01-28	11:00:00	20.5333	24.7333	24.2667	28.4667
2017-01-28	12:00:00	31.2667	32.6667	32.6667	34.5333
2017-01-28	13:00:00	37.3333	38.2667	38.7333	40.6
2017-01-28	14:00:00	40.6	42	—	43.4
2017-01-28	15:00:00	41.0667	40.1333	42.4667	43.4
2017-01-28	16:00:00	40.6	39.6667	42.4667	—
2017-01-28	17:00:00	38.2667	33.1333	40.1333	41.5333
2017-01-28	18:00:00	33.6	34.0667	35.4667	—
2017-01-28	19:00:00	32.6667	32.6667	34.0667	37.3333
2017-01-28	20:00:00	32.2	35.4667	33.6	38.7333
2017-01-28	21:00:00	33.1333	35.9333	35.4667	37.8
2017-01-28	22:00:00	30.8	34.0667	33.6	35
2017-01-28	23:00:00	29.8667	32.2	32.6667	33.6
2017-01-29	00:00:00	31.7333	33.1333	33.6	34.0667
2017-01-29	01:00:00	30.8	32.2	33.6	33.1333
2017-01-29	02:00:00	30.3333	31.7333	33.6	33.1333
2017-01-29	03:00:00	31.2667	32.6667	33.6	34.0667
2017-01-29	04:00:00	31.2667	32.6667	34.0667	33.1333
2017-01-29	05:00:00	31.2667	31.7333	33.1333	34.0667
2017-01-29	06:00:00	30.3333	31.7333	33.1333	34.0667
2017-01-29	07:00:00	28.4667	30.8	30.8	33.1333
2017-01-29	08:00:00	27.5333	28.9333	30.8	32.6667
2017-01-29	09:00:00	26.6	28	28.9333	31.7333
2017-01-29	10:00:00	28	28.4667	28.4667	31.7333
2017-01-29	11:00:00	29.4	30.3333	29.8667	32.6667
2017-01-29	12:00:00	30.3333	30.3333	31.7333	33.6
2017-01-29	13:00:00	32.2	32.2	33.1333	34.0667
2017-01-29	14:00:00	33.1333	33.1333	33.6	35.4667
2017-01-29	15:00:00	34.0667	34.0667	35.4667	36.4
2017-01-29	16:00:00	35	35	35.9333	37.3333
2017-01-29	17:00:00	34.0667	35	35.4667	37.3333
2017-01-29	18:00:00	31.7333	33.1333	33.1333	35.9333
2017-01-29	19:00:00	26.6	28	32.2	33.1333
2017-01-29	20:00:00	23.3333	22.8667	25.2	30.3333
2017-01-29	21:00:00	17.7333	16.3333	20.5333	23.3333
2017-01-29	22:00:00	14.9333	14.4667	13.5333	21
2017-01-29	23:00:00	12.6	20.5333	12.6	16.8
2017-01-30	00:00:00	14	14.4667	13.5333	16.3333
2017-01-30	01:00:00	15.8667	15.4	15.4	19.1333
2017-01-30	02:00:00	14	14.9333	15.4	20.5333
2017-01-30	03:00:00	12.6	11.2	15.4	17.7333
2017-01-30	04:00:00	11.6667	11.2	12.1333	14.4667
2017-01-30	05:00:00	12.1333	11.2	13.0667	15.4
2017-01-30	06:00:00	11.6667	6.53333	13.0667	14
2017-01-30	07:00:00	10.2667	8.4	10.7333	11.2
2017-01-30	08:00:00	4.66667	4.66667	6.53333	8.4
2017-01-30	09:00:00	6.06667	10.2667	7	11.6667
2017-01-30	10:00:00	10.7333	12.1333	11.2	16.8
2017-01-30	11:00:00	15.8667	20.5333	21.4667	16.8
2017-01-30	12:00:00	20.5333	26.6	21.4667	21.9333
2017-01-30	13:00:00	21.9333	29.4	28	28
2017-01-30	14:00:00	23.8	32.2	27.0667	27.5333
2017-01-30	15:00:00	22.8667	33.1333	31.2667	27.5333
2017-01-30	16:00:00	23.3333	33.1333	30.3333	28
2017-01-30	17:00:00	25.2	31.7333	30.8	30.3333
2017-01-30	18:00:00	22.8667	29.4	27.5333	27.0667
2017-01-30	19:00:00	22.4	28	26.6	27.5333
2017-01-30	20:00:00	23.3333	28.4667	24.7333	26.6
2017-01-30	21:00:00	23.8	28.9333	27.5333	26.6
2017-01-30	22:00:00	24.2667	28.4667	26.1333	25.6667
2017-01-30	23:00:00	22.4	26.6	24.7333	22.4
2017-01-31	00:00:00	18.2	23.8	17.7333	11.6667
2017-01-31	01:00:00	12.1333	20.0667	10.7333	14
2017-01-31	02:00:00	15.4	17.2667	11.6667	9.33333
2017-01-31	03:00:00	14	20.5333	15.4	6.53333
2017-01-31	04:00:00	8.4	15.8667	5.6	2.33333
2017-01-31	05:00:00	2.8	11.2	5.13333	4.2
2017-01-31	06:00:00	2.33333	2.8	5.13333	2.33333
2017-01-31	07:00:00	2.33333	1.86667	4.2	3.73333
2017-01-31	08:00:00	2.33333	2.33333	4.66667	1.86667
2017-01-31	09:00:00	6.06667	5.13333	6.53333	6.06667
2017-01-31	10:00:00	8.4	9.33333	8.86667	12.1333
2017-01-31	11:00:00	11.6667	14.9333	12.1333	19.1333
2017-01-31	12:00:00	22.8667	18.6667	21.4667	24.7333
2017-01-31	13:00:00	26.6	27.5333	28.4667	30.3333
2017-01-31	14:00:00	32.6667	32.2	33.1333	35
2017-01-31	15:00:00	35.9333	35.9333	37.3333	38.2667
2017-01-31	16:00:00	37.8	38.2667	38.2667	39.2
2017-01-31	17:00:00	35.9333	37.8	35.9333	39.2
2017-01-31	18:00:00	31.2667	33.6	33.6	37.3333
2017-01-31	19:00:00	15.8667	22.8667	22.8667	26.1333
2017-01-31	20:00:00	11.2	16.8	8.86667	22.4
2017-01-31	21:00:00	13.0667	11.6667	—	21.4667
2017-01-31	22:00:00	13.5333	7.93333	11.2	11.6667
2017-01-31	23:00:00	7.46667	7.46667	8.4	11.2
2017-02-01	00:00:00	8.4	7	8.86667	12.6
2017-02-01	01:00:00	14.9333	12.6	14	18.2
2017-02-01	02:00:00	13.0667	14.4667	15.4	17.7333
2017-02-01	03:00:00	13.0667	13.5333	14.9333	14
2017-02-01	04:00:00	12.6	14.4667	14.4667	15.4
2017-02-01	05:00:00	9.8	12.1333	14.4667	14
2017-02-01	06:00:00	9.33333	10.7333	15.4	13.5333
2017-02-01	07:00:00	9.8	10.2667	9.8	10.7333
2017-02-01	08:00:00	7.46667	9.33333	7.46667	4.66667
2017-02-01	09:00:00	6.53333	8.4	8.4	9.33333
2017-02-01	10:00:00	12.1333	11.6667	14.9333	14.9333
2017-02-01	11:00:00	15.4	16.3333	15.4	19.6
2017-02-01	12:00:00	20.5333	22.8667	21.9333	25.2
2017-02-01	13:00:00	21.9333	28	18.6667	27.0667
2017-02-01	14:00:00	22.8667	32.6667	29.4	28
2017-02-01	15:00:00	29.8667	36.8667	35.9333	33.6
2017-02-01	16:00:00	36.8667	41.5333	38.2667	37.8
2017-02-01	17:00:00	34.5333	42	38.2667	38.2667
2017-02-01	18:00:00	29.8667	39.6667	29.8667	33.6
2017-02-01	19:00:00	22.8667	39.2	22.4	25.2
2017-02-01	20:00:00	17.7333	35.4667	13.0667	20.0667
2017-02-01	21:00:00	6.53333	28.9333	15.4	13.5333
2017-02-01	22:00:00	7	27.0667	12.6	11.6667
2017-02-01	23:00:00	17.2667	34.5333	19.6	7
2017-02-02	00:00:00	12.1333	36.4	28.9333	13.0667
2017-02-02	01:00:00	35	40.1333	36.4	19.1333
2017-02-02	02:00:00	35	39.6667	36.8667	26.6
2017-02-02	03:00:00	34.0667	38.7333	35.4667	16.3333
2017-02-02	04:00:00	19.6	37.8	34.0667	32.2
2017-02-02	05:00:00	18.6667	35.9333	32.2	30.3333
2017-02-02	06:00:00	24.2667	35	29.8667	28.4667
2017-02-02	07:00:00	24.2667	34.5333	29.8667	21.9333
2017-02-02	08:00:00	26.1333	34.5333	27.5333	14
2017-02-02	09:00:00	27.5333	35.9333	28	15.4
2017-02-02	10:00:00	28	36.8667	29.8667	19.1333
2017-02-02	11:00:00	32.2	37.3333	30.3333	25.2
2017-02-02	12:00:00	32.2	39.2	20.5333	35
2017-02-02	13:00:00	33.1333	39.6667	27.5333	33.1333
2017-02-02	14:00:00	—	39.6667	28	36.4
2017-02-02	15:00:00	34.0667	41.5333	26.6	37.3333
2017-02-02	16:00:00	35.4667	41.0667	28.9333	38.2667
2017-02-02	17:00:00	34.5333	42.4667	30.3333	36.4
2017-02-02	18:00:00	35	42	33.1333	29.4
2017-02-02	19:00:00	29.4	38.7333	24.7333	25.2
2017-02-02	20:00:00	23.3333	38.2667	16.3333	20.0667
2017-02-02	21:00:00	24.7333	37.3333	12.1333	2.8
2017-02-02	22:00:00	25.2	35.9333	12.6	3.73333
2017-02-02	23:00:00	21.9333	33.6	9.33333	1.86667
2017-02-03	00:00:00	13.0667	12.1333	5.13333	1.4
2017-02-03	01:00:00	3.26667	11.2	4.66667	1.4
2017-02-03	02:00:00	2.33333	10.2667	4.2	1.4
2017-02-03	03:00:00	1.86667	7.46667	4.2	1.4
2017-02-03	04:00:00	1.4	2.33333	4.2	1.4
2017-02-03	05:00:00	1.4	2.33333	3.73333	1.4
2017-02-03	06:00:00	1.4	2.33333	3.73333	1.4
2017-02-03	07:00:00	1.4	1.86667	4.2	1.4
2017-02-03	08:00:00	2.33333	2.33333	4.2	1.4
2017-02-03	09:00:00	2.8	4.2	5.13333	2.33333
2017-02-03	10:00:00	4.66667	6.06667	6.53333	7.93333
2017-02-03	11:00:00	8.4	17.7333	9.33333	14.4667
2017-02-03	12:00:00	28.4667	35.9333	21.4667	24.7333
2017-02-03	13:00:00	35.9333	39.2	35.4667	38.2667
2017-02-03	14:00:00	39.6667	43.8667	32.2	41.0667
2017-02-03	15:00:00	42.4667	43.8667	42.9333	43.4
2017-02-03	16:00:00	42.4667	43.4	41.5333	43.4
2017-02-03	17:00:00	36.4	—	37.8	40.1333
2017-02-03	18:00:00	24.7333	34.0667	20.5333	35
2017-02-03	19:00:00	11.6667	25.2	8.4	16.8
2017-02-03	20:00:00	3.73333	9.8	6.06667	7.93333
2017-02-03	21:00:00	5.13333	5.13333	6.06667	8.86667
2017-02-03	22:00:00	5.6	3.73333	6.06667	3.73333
2017-02-03	23:00:00	9.8	14.9333	4.2	1.4
2017-02-04	00:00:00	9.33333	25.2	5.13333	1.86667
2017-02-04	01:00:00	9.33333	22.4	7.93333	11.6667
2017-02-04	02:00:00	17.7333	24.7333	13.5333	17.2667
2017-02-04	03:00:00	19.1333	21.9333	16.3333	17.2667
2017-02-04	04:00:00	22.4	20.0667	20.5333	14
2017-02-04	05:00:00	18.2	21	16.8	14
2017-02-04	06:00:00	16.3333	26.6	17.7333	12.6
2017-02-04	07:00:00	5.6	12.6	8.4	14.9333
2017-02-04	08:00:00	7	4.66667	4.66667	2.33333
2017-02-04	09:00:00	7.93333	7.46667	7.46667	12.1333
2017-02-04	10:00:00	15.8667	16.8	14	19.6
2017-02-04	11:00:00	15.4	17.7333	17.7333	27.0667
2017-02-04	12:00:00	24.2667	24.2667	25.2	34.5333
2017-02-04	13:00:00	38.2667	37.8	39.2	43.4
2017-02-04	14:00:00	42	43.4	44.8	46.6667
2017-02-04	15:00:00	47.6	47.1333	45.2667	48.5333
2017-02-04	16:00:00	48.5333	49	44.8	46.6667
2017-02-04	17:00:00	47.6	48.0667	45.2667	49.9333
2017-02-04	18:00:00	41.0667	43.4	38.2667	43.4
2017-02-04	19:00:00	19.6	23.8	11.6667	15.4
2017-02-04	20:00:00	6.06667	15.4	7	2.33333
2017-02-04	21:00:00	5.13333	8.4	5.13333	7
2017-02-04	22:00:00	5.13333	11.6667	5.13333	12.6
2017-02-04	23:00:00	4.2	8.86667	4.66667	14
2017-02-05	00:00:00	10.7333	7.93333	8.86667	14
2017-02-05	01:00:00	16.8	17.2667	14	11.2
2017-02-05	02:00:00	17.7333	19.1333	13.5333	9.8
2017-02-05	03:00:00	15.8667	19.6	13.0667	8.4
2017-02-05	04:00:00	8.86667	17.7333	5.13333	1.86667
2017-02-05	05:00:00	5.13333	12.6	4.2	1.86667
2017-02-05	06:00:00	7.93333	7.46667	5.13333	1.4
2017-02-05	07:00:00	7.46667	9.33333	4.2	1.86667
2017-02-05	08:00:00	7.46667	6.53333	4.66667	2.33333
2017-02-05	09:00:00	8.86667	7.93333	7.46667	5.13333
2017-02-05	10:00:00	9.8	9.8	8.86667	12.1333
2017-02-05	11:00:00	11.6667	11.6667	11.2	15.8667
2017-02-05	12:00:00	14.4667	17.2667	16.8	24.7333
2017-02-05	13:00:00	21.4667	33.1333	28	34.0667
2017-02-05	14:00:00	32.6667	34.0667	31.7333	34.5333
2017-02-05	15:00:00	34.5333	37.3333	33.1333	36.8667
2017-02-05	16:00:00	31.7333	38.7333	35.9333	37.3333
2017-02-05	17:00:00	40.1333	38.2667	40.6	43.4
2017-02-05	18:00:00	31.2667	31.7333	32.2	41.0667
2017-02-05	19:00:00	24.7333	22.8667	28	40.1333
2017-02-05	20:00:00	20.5333	21.9333	25.2	18.2
2017-02-05	21:00:00	13.0667	14.4667	11.6667	14.9333
2017-02-05	22:00:00	7	26.6	5.6	20.0667
2017-02-05	23:00:00	3.73333	22.8667	5.6	5.6
2017-02-06	00:00:00	6.53333	3.26667	5.13333	1.86667
2017-02-06	01:00:00	2.33333	4.2	4.2	2.33333
2017-02-06	02:00:00	2.33333	2.33333	4.2	1.4
2017-02-06	03:00:00	1.86667	2.33333	3.73333	1.4
2017-02-06	04:00:00	1.86667	1.86667	4.2	1.4
2017-02-06	05:00:00	1.4	2.33333	4.2	1.4
2017-02-06	06:00:00	1.86667	3.73333	4.2	1.4
2017-02-06	07:00:00	1.86667	3.73333	4.2	0.933333
2017-02-06	08:00:00	2.33333	2.33333	4.66667	1.4
2017-02-06	09:00:00	3.26667	3.26667	5.13333	2.33333
2017-02-06	10:00:00	5.13333	5.6	6.06667	4.66667
2017-02-06	11:00:00	5.13333	9.33333	7	8.4
2017-02-06	12:00:00	29.4	39.2	30.3333	23.8
2017-02-06	13:00:00	45.2667	51.3333	44.8	47.1333
2017-02-06	14:00:00	49.4667	53.6667	48.0667	49.9333
2017-02-06	15:00:00	45.7333	54.1333	48.0667	47.1333
2017-02-06	16:00:00	49.9333	56.4667	47.6	52.7333
2017-02-06	17:00:00	44.8	53.6667	45.7333	47.6
2017-02-06	18:00:00	43.4	52.2667	39.6667	45.7333
2017-02-06	19:00:00	42.4667	50.4	36.8667	46.6667
2017-02-06	20:00:00	41.5333	48.0667	42	44.3333
2017-02-06	21:00:00	37.3333	43.4	33.1333	42
2017-02-06	22:00:00	39.6667	43.8667	40.1333	41.5333
2017-02-06	23:00:00	37.8	43.4	36.8667	42.4667
2017-02-07	00:00:00	36.4	36.8667	28	38.7333
2017-02-07	01:00:00	40.6	42.4667	31.2667	41.5333
2017-02-07	02:00:00	41.5333	43.4	29.8667	41.5333
2017-02-07	03:00:00	40.6	42.4667	35.4667	38.7333
2017-02-07	04:00:00	39.6667	41.5333	32.6667	38.2667
2017-02-07	05:00:00	39.2	40.6	28.4667	38.2667
2017-02-07	06:00:00	35.9333	38.2667	33.1333	36.4
2017-02-07	07:00:00	31.7333	35	34.5333	31.2667
2017-02-07	08:00:00	29.8667	34.0667	31.2667	30.3333
2017-02-07	09:00:00	26.6	32.6667	27.5333	29.4
2017-02-07	10:00:00	23.8	30.3333	26.6	28
2017-02-07	11:00:00	22.8667	28	26.1333	24.7333
2017-02-07	12:00:00	26.6	27.5333	25.6667	28.4667
2017-02-07	13:00:00	31.2667	33.1333	31.2667	33.1333
2017-02-07	14:00:00	34.5333	34.5333	34.0667	36.4
2017-02-07	15:00:00	36.4	37.8	36.4	38.2667
2017-02-07	16:00:00	37.3333	37.8	37.8	38.2667
2017-02-07	17:00:00	34.0667	35.9333	35.9333	37.3333
2017-02-07	18:00:00	32.2	33.6	33.1333	34.0667
2017-02-07	19:00:00	27.5333	29.4	—	30.3333
2017-02-07	20:00:00	25.6667	28	25.6667	29.4
2017-02-07	21:00:00	28	28.9333	28.9333	30.8
2017-02-07	22:00:00	29.4	29.8667	31.2667	31.7333
2017-02-07	23:00:00	29.4	28.9333	31.2667	30.8
2017-02-08	00:00:00	29.8667	30.3333	31.7333	32.2
2017-02-08	01:00:00	30.8	32.6667	33.1333	33.1333
2017-02-08	02:00:00	30.3333	32.2	33.1333	32.2
2017-02-08	03:00:00	31.2667	32.6667	33.1333	33.1333
2017-02-08	04:00:00	31.2667	32.6667	33.6	33.1333
2017-02-08	05:00:00	31.7333	33.1333	34.5333	32.6667
2017-02-08	06:00:00	30.8	32.2	33.6	32.6667
2017-02-08	07:00:00	27.5333	29.8667	29.8667	30.8
2017-02-08	08:00:00	25.6667	28.4667	27.0667	30.3333
2017-02-08	09:00:00	27.0667	29.4	26.6	31.2667
2017-02-08	10:00:00	28	28.4667	27.5333	31.7333
2017-02-08	11:00:00	29.8667	29.4	29.8667	33.1333
2017-02-08	12:00:00	33.1333	33.1333	33.1333	35.4667
2017-02-08	13:00:00	34.5333	35	35.4667	36.4
2017-02-08	14:00:00	37.3333	36.4	38.2667	39.2
2017-02-08	15:00:00	39.6667	38.2667	39.2	42
2017-02-08	16:00:00	43.4	—	42.9333	44.8
2017-02-08	17:00:00	42.9333	40.1333	43.4	43.8667
2017-02-08	18:00:00	38.2667	39.2	40.1333	41.0667
2017-02-08	19:00:00	33.1333	35	33.6	35.9333
2017-02-08	20:00:00	22.8667	31.7333	26.1333	26.1333
2017-02-08	21:00:00	21.9333	28	28	24.7333
2017-02-08	22:00:00	26.6	29.4	28	29.8667
2017-02-08	23:00:00	27.0667	32.2	26.6	25.6667
2017-02-09	00:00:00	27.5333	30.8	24.2667	27.0667
2017-02-09	01:00:00	27.0667	30.8	23.3333	24.7333
2017-02-09	02:00:00	23.3333	28.9333	25.2	19.6
2017-02-09	03:00:00	24.7333	28	28	17.7333
2017-02-09	04:00:00	23.3333	27.0667	26.6	14.9333
2017-02-09	05:00:00	20.5333	24.2667	22.8667	10.2667
2017-02-09	06:00:00	17.7333	21.9333	18.6667	7.46667
2017-02-09	07:00:00	11.2	12.6	10.7333	7.46667
2017-02-09	08:00:00	7.46667	9.33333	7	4.66667
2017-02-09	09:00:00	12.6	12.6	12.1333	10.2667
2017-02-09	10:00:00	21.9333	19.6	21.4667	28
2017-02-09	11:00:00	28	26.6	28.4667	33.6
2017-02-09	12:00:00	33.1333	33.1333	34.0667	37.8
2017-02-09	13:00:00	36.8667	36.8667	38.2667	41.0667
2017-02-09	14:00:00	40.6	42	43.4	42.9333
2017-02-09	15:00:00	40.1333	40.6	41.5333	42
2017-02-09	16:00:00	40.1333	41.0667	40.6	42
2017-02-09	17:00:00	39.2	40.6	39.6667	42
2017-02-09	18:00:00	36.4	39.2	36.4	40.1333
2017-02-09	19:00:00	25.6667	30.8	28	29.4
2017-02-09	20:00:00	20.0667	26.6	22.8667	26.6
2017-02-09	21:00:00	18.6667	27.5333	17.2667	15.4
2017-02-09	22:00:00	17.7333	16.3333	16.8	7.46667
2017-02-09	23:00:00	13.5333	19.1333	8.4	3.73333
2017-02-10	00:00:00	12.6	22.8667	6.06667	3.26667
2017-02-10	01:00:00	16.8	20.5333	7.46667	5.6
2017-02-10	02:00:00	19.6	21.9333	19.1333	9.8
2017-02-10	03:00:00	17.7333	24.2667	18.2	11.2
2017-02-10	04:00:00	15.8667	24.7333	14.4667	11.6667
2017-02-10	05:00:00	12.6	21.9333	7.93333	9.8
2017-02-10	06:00:00	9.33333	14	5.6	2.8
2017-02-10	07:00:00	3.26667	5.13333	5.13333	1.4
2017-02-10	08:00:00	6.06667	2.33333	5.13333	2.33333
2017-02-10	09:00:00	10.7333	8.86667	8.4	11.2
2017-02-10	10:00:00	16.8	15.8667	16.8	20.0667
2017-02-10	11:00:00	21.4667	23.3333	23.3333	25.2
2017-02-10	12:00:00	28.9333	28.4667	28	28.4667
2017-02-10	13:00:00	32.2	33.6	34.0667	38.2667
2017-02-10	14:00:00	39.2	38.7333	39.6667	42.4667
2017-02-10	15:00:00	42.4667	42.4667	42	43.4
2017-02-10	16:00:00	43.4	43.8667	43.8667	44.3333
2017-02-10	17:00:00	41.0667	42.4667	43.4	42.9333
2017-02-10	18:00:00	35	35.9333	33.6	38.2667
2017-02-10	19:00:00	18.2	27.5333	20.0667	16.8
2017-02-10	20:00:00	12.1333	17.7333	17.7333	5.6
2017-02-10	21:00:00	8.86667	17.7333	9.8	4.2
2017-02-10	22:00:00	6.53333	5.13333	5.6	2.33333
2017-02-10	23:00:00	2.33333	2.8	4.66667	1.4
2017-02-11	00:00:00	2.33333	2.33333	4.66667	1.86667
2017-02-11	01:00:00	2.8	2.33333	4.66667	1.4
2017-02-11	02:00:00	2.33333	2.8	4.66667	1.4
2017-02-11	03:00:00	1.86667	2.33333	4.2	1.4
2017-02-11	04:00:00	1.4	1.86667	3.73333	1.4
2017-02-11	05:00:00	1.86667	1.4	3.73333	1.4
2017-02-11	06:00:00	1.4	1.4	3.73333	1.4
2017-02-11	07:00:00	1.4	1.4	3.73333	1.4
2017-02-11	08:00:00	1.86667	1.86667	4.2	1.4
2017-02-11	09:00:00	4.2	3.26667	6.06667	2.33333
2017-02-11	10:00:00	7.46667	7	7.46667	5.6
2017-02-11	11:00:00	9.33333	12.6	10.7333	15.8667
2017-02-11	12:00:00	14.9333	17.7333	16.8	22.4
2017-02-11	13:00:00	22.8667	28	28	25.6667
2017-02-11	14:00:00	33.1333	33.6	33.6	33.1333
2017-02-11	15:00:00	37.8	40.6	39.6667	38.7333
2017-02-11	16:00:00	41.5333	50.4	44.8	41.0667
2017-02-11	17:00:00	49.4667	55.5333	48.0667	42.9333
2017-02-11	18:00:00	44.8	47.6	49.4667	47.1333
2017-02-11	19:00:00	15.8667	39.6667	22.8667	31.7333
2017-02-11	20:00:00	6.53333	17.7333	8.86667	5.6
2017-02-11	21:00:00	8.86667	6.53333	8.4	1.4
2017-02-11	22:00:00	7.46667	5.6	6.53333	1.86667
2017-02-11	23:00:00	4.2	4.66667	7.46667	1.4
2017-02-12	00:00:00	3.26667	3.73333	6.06667	1.4
2017-02-12	01:00:00	5.13333	3.73333	4.66667	1.4
2017-02-12	02:00:00	2.8	2.8	4.2	1.86667
2017-02-12	03:00:00	2.33333	3.26667	4.2	1.4
2017-02-12	04:00:00	1.86667	3.26667	3.73333	1.4
2017-02-12	05:00:00	1.4	2.33333	3.73333	1.4
2017-02-12	06:00:00	1.4	2.33333	3.73333	1.4
2017-02-12	07:00:00	1.4	2.33333	4.2	1.4
2017-02-12	08:00:00	1.4	3.73333	4.2	1.4
2017-02-12	09:00:00	2.8	3.26667	5.13333	2.33333
2017-02-12	10:00:00	4.66667	6.53333	6.53333	7
2017-02-12	11:00:00	10.2667	11.2	11.2	18.6667
2017-02-12	12:00:00	20.0667	22.4	22.8667	32.2
2017-02-12	13:00:00	30.3333	30.8	37.3333	37.3333
2017-02-12	14:00:00	35	32.6667	37.3333	43.4
2017-02-12	15:00:00	45.7333	42	45.7333	49
2017-02-12	16:00:00	47.6	47.6	47.1333	48.5333
2017-02-12	17:00:00	48.5333	48.5333	46.6667	49.4667
2017-02-12	18:00:00	43.8667	44.3333	42.9333	46.6667
2017-02-12	19:00:00	21.9333	28.9333	20.5333	14.4667
2017-02-12	20:00:00	5.6	10.7333	6.53333	5.6
2017-02-12	21:00:00	3.26667	3.26667	5.13333	2.33333
2017-02-12	22:00:00	2.8	3.73333	5.13333	1.86667
2017-02-12	23:00:00	2.33333	4.2	4.66667	1.86667
2017-02-13	00:00:00	2.8	2.33333	4.2	1.4
2017-02-13	01:00:00	2.33333	2.33333	4.2	1.86667
2017-02-13	02:00:00	1.4	2.33333	3.73333	1.4
2017-02-13	03:00:00	1.4	1.86667	3.73333	1.4
2017-02-13	04:00:00	1.4	1.4	3.73333	1.4
2017-02-13	05:00:00	0.933333	1.4	3.26667	1.86667
2017-02-13	06:00:00	1.4	1.4	3.73333	1.4
2017-02-13	07:00:00	1.4	1.4	3.26667	0.933333
2017-02-13	08:00:00	1.4	1.86667	3.73333	1.4
2017-02-13	09:00:00	4.2	4.2	5.6	3.26667
2017-02-13	10:00:00	8.86667	7.46667	7.93333	7.46667
2017-02-13	11:00:00	12.1333	11.6667	9.8	14.4667
2017-02-13	12:00:00	15.4	17.7333	14.4667	24.2667
2017-02-13	13:00:00	26.1333	34.5333	24.2667	34.5333
2017-02-13	14:00:00	32.6667	35.9333	32.6667	33.6
2017-02-13	15:00:00	29.4	36.4	29.4	33.6
2017-02-13	16:00:00	36.4	41.0667	33.6	33.1333
2017-02-13	17:00:00	35	38.2667	35.4667	36.8667
2017-02-13	18:00:00	22.8667	36.4	20.5333	20.0667
2017-02-13	19:00:00	14.4667	24.7333	9.33333	1.86667
2017-02-13	20:00:00	12.6	8.86667	7.93333	1.4
2017-02-13	21:00:00	8.4	6.53333	7.46667	1.4
2017-02-13	22:00:00	7	3.73333	6.06667	1.86667
2017-02-13	23:00:00	3.73333	4.66667	5.13333	1.4
2017-02-14	00:00:00	1.86667	5.13333	4.2	1.4
2017-02-14	01:00:00	1.86667	4.66667	4.2	1.86667
2017-02-14	02:00:00	1.86667	3.73333	4.2	1.4
2017-02-14	03:00:00	1.86667	3.26667	4.2	1.4
2017-02-14	04:00:00	1.4	2.33333	4.2	1.4
2017-02-14	05:00:00	1.4	2.33333	3.73333	1.4
2017-02-14	06:00:00	1.4	2.33333	3.73333	1.4
2017-02-14	07:00:00	1.86667	2.33333	3.73333	1.4
2017-02-14	08:00:00	2.33333	2.8	5.13333	1.4
2017-02-14	09:00:00	4.66667	3.26667	6.53333	1.86667
2017-02-14	10:00:00	3.73333	6.06667	6.53333	2.8
2017-02-14	11:00:00	10.7333	16.8	9.8	9.8
2017-02-14	12:00:00	19.6	20.5333	21.9333	23.3333
2017-02-14	13:00:00	25.6667	29.8667	29.8667	32.6667
2017-02-14	14:00:00	39.2	43.8667	—	49
2017-02-14	15:00:00	53.2	52.7333	53.6667	53.6667
2017-02-14	16:00:00	53.6667	56.9333	57.8667	56.9333
2017-02-14	17:00:00	55.0667	56.4667	53.6667	58.8
2017-02-14	18:00:00	37.3333	50.8667	42.4667	49
2017-02-14	19:00:00	28	43.4	24.2667	33.1333
2017-02-14	20:00:00	20.5333	39.2	13.5333	11.6667
2017-02-14	21:00:00	26.6	44.8	17.7333	17.2667
2017-02-14	22:00:00	29.8667	47.1333	23.8	15.8667
2017-02-14	23:00:00	31.7333	41.0667	25.6667	25.2
2017-02-15	00:00:00	34.0667	38.2667	28	23.8
2017-02-15	01:00:00	20.5333	29.8667	24.7333	23.3333
2017-02-15	02:00:00	17.7333	29.4	21.9333	25.2
2017-02-15	03:00:00	21.9333	34.5333	29.8667	19.1333
2017-02-15	04:00:00	17.2667	25.2	27.5333	13.0667
2017-02-15	05:00:00	16.8	28	30.3333	16.3333
2017-02-15	06:00:00	11.2	26.1333	21.9333	13.5333
2017-02-15	07:00:00	6.06667	10.2667	15.8667	4.66667
2017-02-15	08:00:00	2.33333	14	7.93333	3.26667
2017-02-15	09:00:00	7.46667	17.2667	11.2	9.8
2017-02-15	10:00:00	19.1333	24.2667	21.9333	16.3333
2017-02-15	11:00:00	28.4667	33.1333	28.4667	33.1333
2017-02-15	12:00:00	37.3333	42.4667	38.2667	40.6
2017-02-15	13:00:00	43.4	48.5333	46.2	46.6667
2017-02-15	14:00:00	49	53.2	46.2	50.8667
2017-02-15	15:00:00	51.3333	56	50.4	52.2667
2017-02-15	16:00:00	52.7333	57.8667	50.4	53.2
2017-02-15	17:00:00	—	58.8	50.8667	52.7333
2017-02-15	18:00:00	45.7333	56.4667	45.2667	44.3333
2017-02-15	19:00:00	28	53.2	35.4667	40.6
2017-02-15	20:00:00	34.0667	48.5333	30.8	30.8
2017-02-15	21:00:00	34.0667	44.3333	23.8	28
2017-02-15	22:00:00	31.7333	38.7333	30.3333	32.6667
2017-02-15	23:00:00	34.5333	40.6	25.2	36.8667
2017-02-16	00:00:00	23.3333	29.4	19.1333	22.8667
2017-02-16	01:00:00	28.9333	30.8	28.4667	15.4
2017-02-16	02:00:00	6.53333	20.5333	12.6	2.33333
2017-02-16	03:00:00	3.26667	14	3.73333	1.4
2017-02-16	04:00:00	1.4	1.86667	3.26667	1.86667
2017-02-16	05:00:00	1.86667	1.4	3.73333	1.4
2017-02-16	06:00:00	1.4	2.33333	4.2	1.4
2017-02-16	07:00:00	2.33333	7.46667	3.26667	1.4
2017-02-16	08:00:00	3.26667	10.2667	4.66667	2.33333
2017-02-16	09:00:00	7.46667	12.1333	8.4	12.1333
2017-02-16	10:00:00	14	15.8667	12.6	20.5333
2017-02-16	11:00:00	21	20.5333	17.7333	27.5333
2017-02-16	12:00:00	29.4	29.8667	28.9333	34.0667
2017-02-16	13:00:00	33.1333	33.6	33.1333	—
2017-02-16	14:00:00	33.1333	34.5333	33.1333	34.5333
2017-02-16	15:00:00	33.1333	33.1333	33.6	35.4667
2017-02-16	16:00:00	36.4	33.6	35.9333	38.2667
2017-02-16	17:00:00	37.3333	33.1333	36.8667	38.7333
2017-02-16	18:00:00	32.6667	34.0667	32.6667	37.8
2017-02-16	19:00:00	26.6	28	21.4667	26.1333
2017-02-16	20:00:00	17.2667	24.2667	17.2667	14.9333
2017-02-16	21:00:00	11.6667	22.4	11.2	14
2017-02-16	22:00:00	12.6	18.2	15.4	11.2
2017-02-16	23:00:00	20.5333	27.5333	21	16.3333
2017-02-17	00:00:00	22.8667	28	24.2667	19.1333
2017-02-17	01:00:00	22.8667	26.1333	23.3333	21.4667
2017-02-17	02:00:00	14.4667	20.0667	13.5333	16.3333
2017-02-17	03:00:00	7	13.0667	12.6	14.9333
2017-02-17	04:00:00	13.0667	17.7333	12.6	11.6667
2017-02-17	05:00:00	15.4	16.3333	16.8	8.4
2017-02-17	06:00:00	9.33333	13.0667	10.7333	5.6
2017-02-17	07:00:00	4.66667	8.86667	3.73333	1.4
2017-02-17	08:00:00	2.33333	2.33333	4.66667	1.4
2017-02-17	09:00:00	3.73333	4.2	7	3.26667
2017-02-17	10:00:00	7.46667	7.93333	8.86667	10.7333
2017-02-17	11:00:00	12.6	15.4	12.6	21
2017-02-17	12:00:00	22.8667	22.8667	22.4	28
2017-02-17	13:00:00	37.3333	32.2	36.8667	34.5333
2017-02-17	14:00:00	47.1333	42.4667	49.4667	39.6667
2017-02-17	15:00:00	43.4	42	46.2	41.0667
2017-02-17	16:00:00	42	42.9333	42	40.6
2017-02-17	17:00:00	42.9333	42.4667	43.4	43.8667
2017-02-17	18:00:00	39.6667	40.1333	40.1333	43.8667
2017-02-17	19:00:00	28	32.2	27.5333	21
2017-02-17	20:00:00	9.33333	16.3333	12.6	2.8
2017-02-17	21:00:00	4.66667	7	6.53333	3.26667
2017-02-17	22:00:00	2.8	3.26667	5.13333	2.33333
2017-02-17	23:00:00	5.6	3.73333	5.13333	1.86667
2017-02-18	00:00:00	2.8	2.33333	5.6	1.4
2017-02-18	01:00:00	2.8	2.33333	4.66667	1.4
2017-02-18	02:00:00	1.86667	2.33333	4.2	1.4
2017-02-18	03:00:00	1.86667	1.86667	3.26667	1.4
2017-02-18	04:00:00	1.4	1.4	3.73333	1.4
2017-02-18	05:00:00	1.86667	1.4	4.2	0.933333
2017-02-18	06:00:00	1.86667	1.86667	3.73333	1.4
2017-02-18	07:00:00	2.33333	3.73333	3.73333	1.4
2017-02-18	08:00:00	2.33333	2.33333	4.2	1.4
2017-02-18	09:00:00	2.8	2.8	5.13333	2.33333
2017-02-18	10:00:00	7	6.53333	9.33333	3.73333
2017-02-18	11:00:00	12.6	15.4	13.0667	12.6
2017-02-18	12:00:00	22.8667	25.6667	20.5333	26.1333
2017-02-18	13:00:00	27.0667	30.3333	25.6667	32.2
2017-02-18	14:00:00	39.6667	42.4667	42.9333	43.4
2017-02-18	15:00:00	41.0667	44.8	42	45.2667
2017-02-18	16:00:00	41.5333	45.7333	42.4667	46.6667
2017-02-18	17:00:00	40.1333	47.1333	43.8667	44.8
2017-02-18	18:00:00	36.4	45.7333	35.9333	42.9333
2017-02-18	19:00:00	33.6	43.4	21.9333	39.2
2017-02-18	20:00:00	28.4667	42	33.1333	33.1333
2017-02-18	21:00:00	21.4667	35	23.3333	28
2017-02-18	22:00:00	16.8	23.3333	7.46667	11.6667
2017-02-18	23:00:00	11.2	14.4667	8.86667	7.46667
2017-02-19	00:00:00	3.26667	9.8	8.4	3.26667
2017-02-19	01:00:00	2.33333	7	17.2667	9.33333
2017-02-19	02:00:00	4.2	14.4667	12.6	2.33333
2017-02-19	03:00:00	4.2	28	7.46667	0.933333
2017-02-19	04:00:00	3.26667	33.1333	4.66667	0.933333
2017-02-19	05:00:00	2.33333	11.2	3.73333	1.4
2017-02-19	06:00:00	0.466667	1.4	3.73333	1.4
2017-02-19	07:00:00	1.4	0.933333	3.73333	0.933333
2017-02-19	08:00:00	1.86667	1.86667	3.73333	1.4
2017-02-19	09:00:00	3.73333	3.26667	5.6	1.86667
2017-02-19	10:00:00	5.13333	6.06667	6.53333	2.8
2017-02-19	11:00:00	3.73333	6.53333	6.53333	8.4
2017-02-19	12:00:00	17.7333	16.8	19.1333	31.2667
2017-02-19	13:00:00	34.0667	35	35.9333	40.6
2017-02-19	14:00:00	40.6	43.4	42.4667	43.4
2017-02-19	15:00:00	37.3333	40.6	39.2	42.4667
2017-02-19	16:00:00	36.8667	39.6667	38.2667	42
2017-02-19	17:00:00	36.4	39.6667	38.7333	43.4
2017-02-19	18:00:00	37.8	38.7333	36.8667	42
2017-02-19	19:00:00	34.5333	35.4667	33.1333	38.2667
2017-02-19	20:00:00	33.1333	35	29.8667	35.4667
2017-02-19	21:00:00	30.3333	32.6667	28	33.1333
2017-02-19	22:00:00	25.2	27.0667	25.2	26.6
2017-02-19	23:00:00	28	28.9333	31.7333	23.3333
2017-02-20	00:00:00	24.2667	28	28	25.6667
2017-02-20	01:00:00	21.9333	26.1333	25.2	21.9333
2017-02-20	02:00:00	22.4	23.8	24.7333	22.8667
2017-02-20	03:00:00	21.4667	23.8	23.8	23.8
2017-02-20	04:00:00	24.2667	25.6667	27.0667	19.1333
2017-02-20	05:00:00	26.6	26.6	28	22.4
2017-02-20	06:00:00	26.1333	26.6	27.5333	22.8667
2017-02-20	07:00:00	22.4	22.8667	22.4	22.8667
2017-02-20	08:00:00	18.2	17.7333	17.2667	19.1333
2017-02-20	09:00:00	17.7333	19.6	21	26.1333
2017-02-20	10:00:00	24.2667	25.6667	27.0667	27.0667
2017-02-20	11:00:00	28	25.2	29.8667	31.2667
2017-02-20	12:00:00	28.9333	24.2667	30.3333	32.6667
2017-02-20	13:00:00	28.4667	23.8	30.8	32.6667
2017-02-20	14:00:00	27.0667	21	29.4	30.3333
2017-02-20	15:00:00	27.0667	24.7333	29.4	29.4
2017-02-20	16:00:00	28	30.8	30.3333	29.4
2017-02-20	17:00:00	28	28.4667	28	30.8
2017-02-20	18:00:00	23.3333	23.3333	22.8667	24.2667
2017-02-20	19:00:00	16.3333	18.6667	15.8667	22.8667
2017-02-20	20:00:00	16.3333	17.7333	16.8	22.4
2017-02-20	21:00:00	14.4667	22.8667	19.6	22.4
2017-02-20	22:00:00	22.8667	33.1333	30.3333	28.9333
2017-02-20	23:00:00	26.6	32.2	31.7333	30.8
2017-02-21	00:00:00	25.6667	28.9333	22.8667	26.6
2017-02-21	01:00:00	22.8667	24.2667	24.2667	23.8
2017-02-21	02:00:00	27.0667	28	27.0667	28
2017-02-21	03:00:00	26.1333	29.4	26.1333	24.7333
2017-02-21	04:00:00	33.1333	34.0667	31.2667	33.1333
2017-02-21	05:00:00	31.2667	35	30.3333	30.3333
2017-02-21	06:00:00	33.1333	34.5333	26.6	28.9333
2017-02-21	07:00:00	29.4	31.2667	28	30.8
2017-02-21	08:00:00	26.6	29.4	29.8667	29.8667
2017-02-21	09:00:00	27.0667	29.8667	17.7333	28.9333
2017-02-21	10:00:00	28	30.8	19.1333	29.8667
2017-02-21	11:00:00	29.8667	33.1333	27.5333	31.2667
2017-02-21	12:00:00	30.8	33.1333	35	31.7333
2017-02-21	13:00:00	32.6667	34.0667	34.0667	34.0667
2017-02-21	14:00:00	38.7333	38.2667	38.7333	39.6667
2017-02-21	15:00:00	43.4	43.4	44.3333	42.9333
2017-02-21	16:00:00	43.4	43.4	44.3333	42.9333
2017-02-21	17:00:00	43.4	43.4	44.3333	42.9333
2017-02-21	18:00:00	40.6	42	43.4	42
2017-02-21	19:00:00	39.6667	41.5333	42.4667	41.5333
2017-02-21	20:00:00	35.4667	40.1333	37.3333	36.4
2017-02-21	21:00:00	33.1333	39.2	28.9333	33.1333
2017-02-21	22:00:00	34.5333	37.3333	33.1333	35
2017-02-21	23:00:00	35.9333	37.8	35	33.6
2017-02-22	00:00:00	30.3333	35.9333	34.5333	29.8667
2017-02-22	01:00:00	34.0667	34.0667	30.8	30.3333
2017-02-22	02:00:00	33.1333	28.9333	30.3333	22.8667
2017-02-22	03:00:00	29.8667	31.2667	22.8667	11.6667
2017-02-22	04:00:00	23.8	31.7333	18.2	15.4
2017-02-22	05:00:00	23.3333	31.7333	24.2667	26.1333
2017-02-22	06:00:00	30.3333	28.4667	29.8667	26.1333
2017-02-22	07:00:00	32.6667	28.4667	24.7333	23.3333
2017-02-22	08:00:00	30.8	25.6667	19.6	24.2667
2017-02-22	09:00:00	28.9333	33.1333	26.6	25.6667
2017-02-22	10:00:00	24.7333	33.1333	28	28
2017-02-22	11:00:00	33.1333	34.5333	32.6667	38.2667
2017-02-22	12:00:00	38.7333	40.6	38.2667	40.6
2017-02-22	13:00:00	42	42.9333	40.6	41.5333
2017-02-22	14:00:00	42.9333	43.4	42.4667	42.4667
2017-02-22	15:00:00	43.8667	43.8667	43.4	43.4
2017-02-22	16:00:00	45.2667	45.2667	45.2667	44.3333
2017-02-22	17:00:00	43.8667	45.2667	43.4	43.8667
2017-02-22	18:00:00	38.7333	42	38.7333	40.6
2017-02-22	19:00:00	28.4667	33.6	27.5333	24.7333
2017-02-22	20:00:00	19.6	25.2	18.2	19.6
2017-02-22	21:00:00	17.7333	28	18.2	19.1333
2017-02-22	22:00:00	22.4	27.5333	20.0667	18.6667
2017-02-22	23:00:00	23.8	30.8	21	18.6667
2017-02-23	00:00:00	23.3333	29.8667	25.6667	21.4667
2017-02-23	01:00:00	26.6	30.3333	25.6667	23.8
2017-02-23	02:00:00	27.5333	29.4	27.0667	16.8
2017-02-23	03:00:00	—	29.8667	28	24.2667
2017-02-23	04:00:00	22.4	28	26.6	24.2667
2017-02-23	05:00:00	21.9333	28	17.7333	13.0667
2017-02-23	06:00:00	19.6	28	21	8.4
2017-02-23	07:00:00	14.4667	22.8667	14.4667	9.33333
2017-02-23	08:00:00	14.4667	16.3333	8.86667	4.2
2017-02-23	09:00:00	16.8	17.7333	16.3333	14.4667
2017-02-23	10:00:00	17.7333	19.1333	18.2	24.2667
2017-02-23	11:00:00	23.8	21.4667	22.4	29.4
2017-02-23	12:00:00	31.2667	33.1333	29.4	37.3333
2017-02-23	13:00:00	39.2	40.6	37.3333	43.4
2017-02-23	14:00:00	47.6	43.4	46.6667	48.5333
2017-02-23	15:00:00	49.9333	48.0667	49	48.5333
2017-02-23	16:00:00	49	48.5333	49	48.5333
2017-02-23	17:00:00	48.0667	48.0667	46.6667	47.1333
2017-02-23	18:00:00	44.8	45.2667	43.4	47.6
2017-02-23	19:00:00	34.5333	38.2667	36.8667	22.4
2017-02-23	20:00:00	11.6667	29.4	21.4667	7.93333
2017-02-23	21:00:00	10.7333	17.2667	9.33333	9.8
2017-02-23	22:00:00	16.8	8.4	4.66667	9.8
2017-02-23	23:00:00	10.7333	7.93333	12.6	4.2
2017-02-24	00:00:00	6.53333	2.33333	5.13333	1.86667
2017-02-24	01:00:00	10.7333	12.6	7	1.86667
2017-02-24	02:00:00	11.6667	4.66667	6.53333	2.33333
2017-02-24	03:00:00	3.26667	2.33333	3.73333	1.4
2017-02-24	04:00:00	1.4	2.33333	3.73333	1.4
2017-02-24	05:00:00	1.4	1.4	3.73333	1.4
2017-02-24	06:00:00	1.4	1.4	3.73333	1.4
2017-02-24	07:00:00	1.4	2.33333	3.73333	1.4
2017-02-24	08:00:00	2.33333	7	4.66667	1.86667
2017-02-24	09:00:00	5.6	11.2	7.46667	5.6
2017-02-24	10:00:00	9.8	15.4	15.8667	14.9333
2017-02-24	11:00:00	15.4	34.0667	21	34.0667
2017-02-24	12:00:00	34.0667	37.8	29.8667	43.4
2017-02-24	13:00:00	43.4	47.6	40.6	51.8
2017-02-24	14:00:00	58.8	54.6	52.7333	57.8667
2017-02-24	15:00:00	62.5333	53.2	59.7333	53.6667
2017-02-24	16:00:00	57.4	—	49.9333	47.6
2017-02-24	17:00:00	58.8	62.5333	49	47.1333
2017-02-24	18:00:00	41.5333	57.4	39.2	42.4667
2017-02-24	19:00:00	21.4667	35.9333	20.5333	24.2667
2017-02-24	20:00:00	16.8	28.4667	15.4	7
2017-02-24	21:00:00	22.4	29.4	15.4	15.4
2017-02-24	22:00:00	26.1333	31.7333	22.8667	22.4
2017-02-24	23:00:00	19.1333	33.1333	14.9333	7
2017-02-25	00:00:00	2.33333	21.4667	5.6	1.4
2017-02-25	01:00:00	6.06667	7.46667	11.2	1.4
2017-02-25	02:00:00	13.0667	21.4667	18.6667	9.33333
2017-02-25	03:00:00	14.9333	22.8667	10.2667	5.13333
2017-02-25	04:00:00	22.8667	21	17.2667	6.06667
2017-02-25	05:00:00	22.4	20.0667	21	3.26667
2017-02-25	06:00:00	13.0667	19.1333	17.2667	2.8
2017-02-25	07:00:00	9.8	12.6	8.86667	2.33333
2017-02-25	08:00:00	6.53333	10.7333	5.6	1.86667
2017-02-25	09:00:00	7.93333	15.4	8.4	4.66667
2017-02-25	10:00:00	19.6	27.5333	15.8667	23.8
2017-02-25	11:00:00	26.1333	29.8667	25.6667	27.5333
2017-02-25	12:00:00	28.4667	30.3333	28.9333	32.2
2017-02-25	13:00:00	34.5333	35.9333	35.4667	35
2017-02-25	14:00:00	42	41.0667	37.3333	42.4667
2017-02-25	15:00:00	46.2	46.6667	43.4	45.7333
2017-02-25	16:00:00	49.4667	50.4	48.0667	45.7333
2017-02-25	17:00:00	49.4667	49.9333	49	96.1333
2017-02-25	18:00:00	46.2	48.5333	43.4	57.8667
2017-02-25	19:00:00	31.2667	39.2	27.5333	14.4667
2017-02-25	20:00:00	14.9333	27.0667	7.46667	5.13333
2017-02-25	21:00:00	6.53333	6.53333	5.13333	4.2
2017-02-25	22:00:00	4.2	6.53333	4.66667	1.86667
2017-02-25	23:00:00	2.33333	7.93333	4.2	2.33333
2017-02-26	00:00:00	2.33333	4.66667	4.2	1.86667
2017-02-26	01:00:00	1.86667	4.66667	4.2	1.4
2017-02-26	02:00:00	1.4	5.13333	3.73333	1.4
2017-02-26	03:00:00	0.933333	4.66667	3.73333	1.4
2017-02-26	04:00:00	1.4	4.2	3.73333	1.4
2017-02-26	05:00:00	1.4	4.2	3.26667	1.4
2017-02-26	06:00:00	0.933333	4.2	3.73333	1.4
2017-02-26	07:00:00	1.86667	3.73333	3.73333	1.4
2017-02-26	08:00:00	1.86667	5.6	4.2	1.4
2017-02-26	09:00:00	3.26667	9.8	5.6	1.86667
2017-02-26	10:00:00	13.5333	17.7333	10.2667	6.06667
2017-02-26	11:00:00	26.1333	33.6	21.4667	17.2667
2017-02-26	12:00:00	27.5333	35	27.5333	28
2017-02-26	13:00:00	39.6667	41.0667	36.4	33.1333
2017-02-26	14:00:00	48.0667	49.4667	46.2	40.6
2017-02-26	15:00:00	49	53.2	48.5333	43.4
2017-02-26	16:00:00	49.9333	51.8	48.0667	45.2667
2017-02-26	17:00:00	52.7333	52.2667	51.3333	47.1333
2017-02-26	18:00:00	49.4667	51.8	48.0667	46.6667
2017-02-26	19:00:00	33.1333	43.4	36.8667	28.4667
2017-02-26	20:00:00	13.0667	23.3333	20.5333	14.9333
2017-02-26	21:00:00	5.13333	16.3333	6.06667	5.6
2017-02-26	22:00:00	3.73333	7.46667	4.2	1.86667
2017-02-26	23:00:00	4.2	4.2	3.73333	1.86667
2017-02-27	00:00:00	1.86667	4.2	3.73333	1.4
2017-02-27	01:00:00	1.4	5.13333	4.2	1.4
2017-02-27	02:00:00	1.86667	4.66667	3.73333	1.4
2017-02-27	03:00:00	1.4	4.2	3.26667	1.4
2017-02-27	04:00:00	1.4	3.73333	3.73333	1.4
2017-02-27	05:00:00	1.4	3.26667	3.73333	1.4
2017-02-27	06:00:00	0.933333	3.73333	4.2	1.4
2017-02-27	07:00:00	6.06667	4.2	3.73333	1.4
2017-02-27	08:00:00	1.86667	5.13333	4.2	1.86667
2017-02-27	09:00:00	2.8	6.53333	5.13333	3.73333
2017-02-27	10:00:00	4.66667	—	7	12.1333
2017-02-27	11:00:00	11.2	19.6	11.6667	16.3333
2017-02-27	12:00:00	27.0667	28.9333	27.0667	21.9333
2017-02-27	13:00:00	30.3333	31.7333	32.6667	46.2
2017-02-27	14:00:00	46.6667	48.5333	43.8667	47.6
2017-02-27	15:00:00	49	—	47.6	46.2
2017-02-27	16:00:00	51.3333	53.6667	49.4667	48.0667
2017-02-27	17:00:00	49	53.2	48.5333	46.6667
2017-02-27	18:00:00	47.1333	50.4	47.1333	45.7333
2017-02-27	19:00:00	32.2	42	33.1333	26.6
2017-02-27	20:00:00	8.86667	22.4	11.6667	10.7333
2017-02-27	21:00:00	6.06667	12.6	5.6	7.93333
2017-02-27	22:00:00	4.66667	12.1333	5.13333	1.4
2017-02-27	23:00:00	2.33333	5.13333	4.2	1.86667
2017-02-28	00:00:00	2.8	4.2	3.73333	1.4
2017-02-28	01:00:00	2.33333	3.73333	3.73333	1.4
2017-02-28	02:00:00	0.933333	5.13333	3.73333	1.4
2017-02-28	03:00:00	0.933333	4.2	3.73333	1.4
2017-02-28	04:00:00	0.933333	4.2	3.73333	1.4
2017-02-28	05:00:00	1.4	3.73333	3.26667	1.4
2017-02-28	06:00:00	0.933333	4.2	3.73333	0.933333
2017-02-28	07:00:00	0.933333	3.73333	3.26667	1.4
2017-02-28	08:00:00	1.86667	4.66667	4.2	1.4
2017-02-28	09:00:00	2.33333	5.6	4.66667	2.33333
2017-02-28	10:00:00	3.73333	6.53333	5.6	3.26667
2017-02-28	11:00:00	6.06667	9.33333	7.46667	13.5333
2017-02-28	12:00:00	21.4667	14.4667	15.4	24.2667
2017-02-28	13:00:00	27.0667	28.9333	26.1333	31.2667
2017-02-28	14:00:00	35.9333	36.8667	34.0667	40.6
2017-02-28	15:00:00	43.4	43.8667	43.4	43.8667
2017-02-28	16:00:00	42.4667	45.2667	41.5333	43.4
2017-02-28	17:00:00	41.5333	44.8	41.5333	42.9333
2017-02-28	18:00:00	40.1333	43.8667	41.0667	41.0667
2017-02-28	19:00:00	29.4	37.8	27.5333	27.5333
2017-02-28	20:00:00	21.9333	33.1333	13.0667	18.6667
2017-02-28	21:00:00	25.2	33.1333	17.7333	26.1333
2017-02-28	22:00:00	27.0667	35.4667	26.6	30.8
2017-02-28	23:00:00	32.6667	37.3333	33.1333	33.1333
2017-03-01	00:00:00	30.8	37.3333	32.6667	30.3333
2017-03-01	01:00:00	32.2	36.8667	35.4667	31.2667
2017-03-01	02:00:00	33.6	37.8	36.4	33.6
2017-03-01	03:00:00	36.4	40.1333	39.6667	35.4667
2017-03-01	04:00:00	38.2667	42	40.6	37.3333
2017-03-01	05:00:00	37.3333	41.5333	40.6	37.8
2017-03-01	06:00:00	39.2	42	41.5333	39.6667
2017-03-01	07:00:00	33.6	38.2667	38.2667	36.8667
2017-03-01	08:00:00	31.7333	35.9333	31.7333	34.5333
2017-03-01	09:00:00	34.5333	38.2667	34.0667	36.4
2017-03-01	10:00:00	37.8	41.5333	38.2667	38.2667
2017-03-01	11:00:00	38.7333	43.4	40.1333	40.1333
2017-03-01	12:00:00	40.1333	43.4	41.5333	40.6
2017-03-01	13:00:00	42	44.8	42.4667	41.0667
2017-03-01	14:00:00	42	45.7333	43.4	42
2017-03-01	15:00:00	30.3333	46.2	43.8667	42.9333
2017-03-01	16:00:00	39.2	46.6667	43.8667	43.4
2017-03-01	17:00:00	39.2	45.7333	33.1333	42.4667
2017-03-01	18:00:00	38.7333	43.4	30.3333	41.0667
2017-03-01	19:00:00	34.0667	38.7333	26.1333	31.2667
2017-03-01	20:00:00	17.2667	29.4	12.6	8.4
2017-03-01	21:00:00	6.06667	13.5333	6.53333	6.53333
2017-03-01	22:00:00	2.33333	7.46667	4.2	2.33333
2017-03-01	23:00:00	2.33333	5.13333	4.66667	1.86667
2017-03-02	00:00:00	1.4	4.2	4.2	1.86667
2017-03-02	01:00:00	0.933333	4.66667	3.26667	1.86667
2017-03-02	02:00:00	0.933333	4.66667	3.73333	1.86667
2017-03-02	03:00:00	0.933333	3.73333	3.73333	1.4
2017-03-02	04:00:00	0.933333	4.2	4.2	1.4
2017-03-02	05:00:00	1.4	4.2	3.73333	1.4
2017-03-02	06:00:00	0.933333	4.2	4.2	1.4
2017-03-02	07:00:00	1.4	4.2	3.73333	1.4
2017-03-02	08:00:00	1.86667	4.66667	5.13333	1.86667
2017-03-02	09:00:00	3.26667	7.46667	6.06667	2.8
2017-03-02	10:00:00	11.2	17.7333	13.0667	11.6667
2017-03-02	11:00:00	21	25.6667	20.0667	21.9333
2017-03-02	12:00:00	30.3333	38.2667	28	38.2667
2017-03-02	13:00:00	35.9333	42	40.1333	38.2667
2017-03-02	14:00:00	37.8	44.3333	41.5333	39.2
2017-03-02	15:00:00	40.6	47.1333	45.2667	43.4
2017-03-02	16:00:00	40.6	47.6	42.9333	43.8667
2017-03-02	17:00:00	38.7333	48.0667	41.5333	43.4
2017-03-02	18:00:00	36.8667	47.1333	39.2	40.6
2017-03-02	19:00:00	22.8667	40.6	28	35.9333
2017-03-02	20:00:00	16.8	36.4	12.1333	19.1333
2017-03-02	21:00:00	7.46667	32.6667	8.4	6.06667
2017-03-02	22:00:00	13.0667	28	7	2.33333
2017-03-02	23:00:00	7	6.53333	7.93333	1.4
2017-03-03	00:00:00	2.8	6.06667	4.66667	1.4
2017-03-03	01:00:00	1.4	5.6	4.2	1.4
2017-03-03	02:00:00	0.466667	5.13333	3.26667	1.4
2017-03-03	03:00:00	0.466667	4.2	3.73333	1.4
2017-03-03	04:00:00	0.466667	4.2	3.26667	1.4
2017-03-03	05:00:00	0.466667	3.73333	3.26667	1.4
2017-03-03	06:00:00	0.933333	4.2	3.73333	1.4
2017-03-03	07:00:00	1.4	4.2	3.73333	1.4
2017-03-03	08:00:00	1.86667	5.6	4.2	1.86667
2017-03-03	09:00:00	5.6	10.7333	7	7.46667
2017-03-03	10:00:00	14	17.7333	12.6	19.1333
2017-03-03	11:00:00	18.2	24.2667	20.5333	26.6
2017-03-03	12:00:00	28	30.8	30.3333	36.4
2017-03-03	13:00:00	38.2667	39.6667	40.1333	42
2017-03-03	14:00:00	43.4	43.4	44.8	44.8
2017-03-03	15:00:00	43.8667	46.2	45.7333	44.3333
2017-03-03	16:00:00	43.4	46.2	44.8	44.3333
2017-03-03	17:00:00	42.9333	44.8	44.8	45.2667
2017-03-03	18:00:00	40.6	—	39.6667	43.8667
2017-03-03	19:00:00	28	28.9333	32.6667	28
2017-03-03	20:00:00	6.53333	20.0667	8.4	10.2667
2017-03-03	21:00:00	6.06667	7.93333	7.46667	7.46667
2017-03-03	22:00:00	3.26667	3.73333	4.66667	2.33333
2017-03-03	23:00:00	1.4	2.33333	4.2	1.86667
2017-03-04	00:00:00	5.13333	4.66667	4.2	1.86667
2017-03-04	01:00:00	0.933333	2.33333	4.2	1.4
2017-03-04	02:00:00	0.466667	1.4	3.73333	1.4
2017-03-04	03:00:00	0.466667	2.8	3.26667	1.4
2017-03-04	04:00:00	0.466667	2.33333	3.73333	1.4
2017-03-04	05:00:00	0.466667	0.933333	3.26667	1.4
2017-03-04	06:00:00	0.466667	0.933333	3.73333	0.933333
2017-03-04	07:00:00	0.466667	0.466667	3.26667	1.4
2017-03-04	08:00:00	0.933333	1.4	3.73333	1.86667
2017-03-04	09:00:00	3.26667	2.8	5.6	2.8
2017-03-04	10:00:00	7.93333	9.8	7.46667	4.66667
2017-03-04	11:00:00	12.6	15.8667	12.1333	9.33333
2017-03-04	12:00:00	16.8	20.0667	21.4667	21.4667
2017-03-04	13:00:00	31.7333	30.8	32.6667	42.4667
2017-03-04	14:00:00	46.2	44.8	47.6	50.4
2017-03-04	15:00:00	48.0667	48.0667	49.4667	51.8
2017-03-04	16:00:00	49	51.3333	51.3333	52.2667
2017-03-04	17:00:00	48.5333	51.3333	49	51.3333
2017-03-04	18:00:00	44.3333	49	46.2	49.4667
2017-03-04	19:00:00	32.2	36.8667	32.6667	27.0667
2017-03-04	20:00:00	14	21	8.4	16.3333
2017-03-04	21:00:00	12.6	25.6667	6.06667	11.2
2017-03-04	22:00:00	5.13333	15.4	7.93333	11.6667
2017-03-04	23:00:00	4.66667	11.2	6.53333	3.73333
2017-03-05	00:00:00	12.6	15.4	9.8	10.2667
2017-03-05	01:00:00	14	19.1333	14.4667	15.4
2017-03-05	02:00:00	14.4667	17.7333	14.4667	14
2017-03-05	03:00:00	10.7333	14	10.7333	12.6
2017-03-05	04:00:00	12.6	14.9333	12.6	13.5333
2017-03-05	05:00:00	9.33333	13.5333	10.7333	9.8
2017-03-05	06:00:00	7	10.7333	14	12.6
2017-03-05	07:00:00	8.4	14.4667	16.8	13.0667
2017-03-05	08:00:00	9.8	12.6	7.93333	14.4667
2017-03-05	09:00:00	14.9333	17.7333	17.2667	21
2017-03-05	10:00:00	26.6	29.8667	29.8667	30.8
2017-03-05	11:00:00	33.1333	35	36.4	35.4667
2017-03-05	12:00:00	36.8667	38.7333	39.6667	40.6
2017-03-05	13:00:00	38.7333	41.5333	41.0667	41.5333
2017-03-05	14:00:00	38.2667	42	42.4667	42.4667
2017-03-05	15:00:00	42	43.8667	43.8667	45.2667
2017-03-05	16:00:00	43.4	47.1333	46.6667	46.6667
2017-03-05	17:00:00	42.4667	45.7333	45.7333	45.2667
2017-03-05	18:00:00	39.2	42	42.4667	42
2017-03-05	19:00:00	34.0667	37.8	38.2667	37.8
2017-03-05	20:00:00	28	33.1333	30.8	29.4
2017-03-05	21:00:00	22.8667	32.6667	23.3333	26.1333
2017-03-05	22:00:00	21.4667	30.8	28	18.2
2017-03-05	23:00:00	21.9333	31.7333	25.2	17.7333
2017-03-06	00:00:00	25.2	31.7333	25.6667	12.6
2017-03-06	01:00:00	21.4667	31.7333	21.4667	5.13333
2017-03-06	02:00:00	10.2667	22.4	7	2.33333
2017-03-06	03:00:00	16.3333	17.7333	4.2	1.86667
2017-03-06	04:00:00	12.6	17.7333	7.46667	3.26667
2017-03-06	05:00:00	7.46667	19.1333	12.6	1.4
2017-03-06	06:00:00	8.4	14	11.2	1.86667
2017-03-06	07:00:00	6.53333	2.33333	5.13333	1.4
2017-03-06	08:00:00	7.46667	5.6	5.13333	1.86667
2017-03-06	09:00:00	12.6	11.6667	12.1333	4.66667
2017-03-06	10:00:00	12.6	17.2667	16.8	13.0667
2017-03-06	11:00:00	16.8	19.1333	21.4667	18.2
2017-03-06	12:00:00	32.6667	31.2667	35.9333	37.8
2017-03-06	13:00:00	38.2667	40.1333	41.0667	40.6
2017-03-06	14:00:00	40.6	42	43.4	42.9333
2017-03-06	15:00:00	42	43.4	44.3333	42.4667
2017-03-06	16:00:00	41.0667	43.4	43.4	42
2017-03-06	17:00:00	40.6	42.9333	43.4	41.5333
2017-03-06	18:00:00	37.8	40.1333	39.2	39.2
2017-03-06	19:00:00	33.1333	36.4	31.7333	36.8667
2017-03-06	20:00:00	26.1333	30.3333	20.0667	33.1333
2017-03-06	21:00:00	23.3333	30.3333	24.2667	25.2
2017-03-06	22:00:00	16.3333	26.1333	—	9.33333
2017-03-06	23:00:00	13.0667	22.4	9.33333	2.33333
2017-03-07	00:00:00	21	22.8667	10.7333	8.4
2017-03-07	01:00:00	13.5333	18.6667	10.2667	9.33333
2017-03-07	02:00:00	10.7333	16.3333	8.86667	8.4
2017-03-07	03:00:00	7.46667	14	10.2667	2.8
2017-03-07	04:00:00	7.46667	14.4667	7.46667	2.33333
2017-03-07	05:00:00	6.06667	6.53333	8.86667	2.33333
2017-03-07	06:00:00	4.66667	7.93333	3.73333	1.86667
2017-03-07	07:00:00	1.4	3.26667	3.26667	2.33333
2017-03-07	08:00:00	1.86667	1.86667	4.66667	2.33333
2017-03-07	09:00:00	4.2	5.13333	6.06667	7.46667
2017-03-07	10:00:00	8.4	7.46667	8.4	14
2017-03-07	11:00:00	19.6	21.9333	21.9333	25.6667
2017-03-07	12:00:00	33.1333	32.6667	36.4	35.4667
2017-03-07	13:00:00	37.8	38.2667	39.6667	39.6667
2017-03-07	14:00:00	37.8	39.2	41.0667	39.6667
2017-03-07	15:00:00	40.6	41.5333	43.4	42.9333
2017-03-07	16:00:00	42	43.4	44.8	42.9333
2017-03-07	17:00:00	41.0667	43.4	43.8667	42.9333
2017-03-07	18:00:00	40.6	43.4	38.2667	42
2017-03-07	19:00:00	33.6	38.2667	35	34.0667
2017-03-07	20:00:00	25.2	28.9333	23.3333	7.93333
2017-03-07	21:00:00	13.0667	16.8	5.13333	7
2017-03-07	22:00:00	8.86667	9.8	4.66667	1.86667
2017-03-07	23:00:00	3.73333	7.46667	2.33333	1.4
2017-03-08	00:00:00	2.33333	3.26667	1.86667	1.86667
2017-03-08	01:00:00	7	6.53333	2.33333	4.66667
2017-03-08	02:00:00	15.4	15.4	7.46667	2.8
2017-03-08	03:00:00	14.9333	18.2	12.6	8.4
2017-03-08	04:00:00	17.7333	21.4667	9.8	11.2
2017-03-08	05:00:00	14	21.4667	9.33333	6.06667
2017-03-08	06:00:00	15.8667	20.5333	11.2	16.3333
2017-03-08	07:00:00	11.6667	15.8667	9.33333	11.2
2017-03-08	08:00:00	8.4	11.2	7	7.46667
2017-03-08	09:00:00	11.6667	14.9333	10.2667	14.9333
2017-03-08	10:00:00	14.9333	16.3333	15.8667	20.5333
2017-03-08	11:00:00	26.1333	26.1333	26.1333	31.7333
2017-03-08	12:00:00	34.5333	35.4667	35.9333	36.4
2017-03-08	13:00:00	35.9333	37.8	36.8667	37.3333
2017-03-08	14:00:00	37.3333	39.6667	38.7333	38.7333
2017-03-08	15:00:00	39.6667	41.5333	40.6	41.5333
2017-03-08	16:00:00	43.4	44.8	43.4	43.4
2017-03-08	17:00:00	44.8	43.8667	42.4667	43.4
2017-03-08	18:00:00	42.9333	41.5333	41.0667	43.4
2017-03-08	19:00:00	37.3333	38.7333	36.8667	32.2
2017-03-08	20:00:00	25.2	26.1333	18.2	6.53333
2017-03-08	21:00:00	19.1333	18.2	12.1333	3.26667
2017-03-08	22:00:00	9.33333	12.6	7.93333	2.33333
2017-03-08	23:00:00	8.4	6.06667	5.6	1.4
2017-03-09	00:00:00	2.33333	1.86667	2.33333	1.4
2017-03-09	01:00:00	1.86667	1.4	2.33333	1.4
2017-03-09	02:00:00	1.4	1.4	2.33333	1.4
2017-03-09	03:00:00	3.73333	1.86667	1.86667	1.4
2017-03-09	04:00:00	3.26667	4.2	2.33333	1.4
2017-03-09	05:00:00	1.4	2.8	1.86667	1.4
2017-03-09	06:00:00	1.4	0.933333	1.86667	0.933333
2017-03-09	07:00:00	1.86667	0.933333	1.86667	1.4
2017-03-09	08:00:00	4.2	2.33333	2.33333	2.33333
2017-03-09	09:00:00	7.93333	7	7.46667	7.46667
2017-03-09	10:00:00	10.7333	9.8	9.33333	11.2
2017-03-09	11:00:00	25.2	22.8667	18.6667	28.4667
2017-03-09	12:00:00	35	36.4	34.5333	40.1333
2017-03-09	13:00:00	42	38.2667	40.1333	43.8667
2017-03-09	14:00:00	43.4	40.6	43.8667	43.4
2017-03-09	15:00:00	45.2667	38.7333	44.3333	43.8667
2017-03-09	16:00:00	44.8	41.0667	44.3333	44.3333
2017-03-09	17:00:00	46.6667	43.4	44.3333	44.3333
2017-03-09	18:00:00	43.4	38.2667	42	44.3333
2017-03-09	19:00:00	35	31.2667	34.5333	22.8667
2017-03-09	20:00:00	16.3333	—	15.8667	1.86667
2017-03-09	21:00:00	5.6	4.66667	4.2	1.86667
2017-03-09	22:00:00	2.8	2.33333	3.26667	1.86667
2017-03-09	23:00:00	2.33333	2.8	2.8	1.86667
2017-03-10	00:00:00	1.86667	2.33333	2.33333	1.86667
2017-03-10	01:00:00	1.86667	1.4	2.33333	1.4
2017-03-10	02:00:00	1.4	0.933333	2.33333	1.4
2017-03-10	03:00:00	1.4	1.4	2.33333	1.4
2017-03-10	04:00:00	0.933333	1.4	1.86667	1.4
2017-03-10	05:00:00	0.933333	0.933333	1.86667	1.4
2017-03-10	06:00:00	0.933333	0.933333	1.86667	0.933333
2017-03-10	07:00:00	0.933333	0.933333	2.33333	1.4
2017-03-10	08:00:00	2.33333	1.4	2.33333	1.86667
2017-03-10	09:00:00	3.26667	2.8	3.26667	5.13333
2017-03-10	10:00:00	5.6	5.13333	5.13333	14.9333
2017-03-10	11:00:00	16.3333	13.0667	12.6	36.4
2017-03-10	12:00:00	33.6	33.6	29.4	38.2667
2017-03-10	13:00:00	42.9333	42.4667	42	43.4
2017-03-10	14:00:00	46.6667	48.5333	44.8	47.1333
2017-03-10	15:00:00	49.9333	50.4	50.4	47.1333
2017-03-10	16:00:00	51.8	52.2667	51.8	49
2017-03-10	17:00:00	50.4	52.7333	51.8	50.4
2017-03-10	18:00:00	45.7333	49.9333	46.6667	49
2017-03-10	19:00:00	41.5333	46.6667	42.9333	47.1333
2017-03-10	20:00:00	27.5333	28	16.8	14
2017-03-10	21:00:00	9.33333	5.6	7.46667	4.2
2017-03-10	22:00:00	7.46667	2.33333	2.8	1.86667
2017-03-10	23:00:00	2.8	2.33333	2.33333	1.86667
2017-03-11	00:00:00	2.8	6.53333	3.73333	1.4
2017-03-11	01:00:00	12.1333	7.93333	2.33333	1.4
2017-03-11	02:00:00	3.73333	8.4	2.33333	1.86667
2017-03-11	03:00:00	2.33333	2.33333	2.33333	1.4
2017-03-11	04:00:00	0.933333	2.33333	1.4	0.933333
2017-03-11	05:00:00	6.53333	11.2	2.33333	7.46667
2017-03-11	06:00:00	14.4667	18.2	9.33333	12.1333
2017-03-11	07:00:00	5.13333	5.13333	3.26667	4.2
2017-03-11	08:00:00	4.2	2.8	2.33333	6.06667
2017-03-11	09:00:00	5.6	6.53333	5.13333	7.46667
2017-03-11	10:00:00	9.33333	7.93333	7.46667	15.4
2017-03-11	11:00:00	14	12.6	12.1333	24.7333
2017-03-11	12:00:00	34.5333	27.5333	32.6667	38.2667
2017-03-11	13:00:00	49.4667	46.6667	48.5333	48.0667
2017-03-11	14:00:00	49.9333	49.9333	47.6	47.1333
2017-03-11	15:00:00	49.4667	48.0667	48.5333	49
2017-03-11	16:00:00	48.5333	49.4667	47.1333	47.6
2017-03-11	17:00:00	40.6	43.4	39.6667	41.0667
2017-03-11	18:00:00	35.4667	37.8	34.0667	38.7333
2017-03-11	19:00:00	31.2667	33.1333	26.1333	35.4667
2017-03-11	20:00:00	26.1333	28	22.8667	31.7333
2017-03-11	21:00:00	26.6	30.8	28.4667	31.2667
2017-03-11	22:00:00	27.0667	28.9333	27.5333	31.7333
2017-03-11	23:00:00	26.1333	28	28	27.5333
2017-03-12	00:00:00	17.7333	23.3333	20.5333	25.6667
2017-03-12	01:00:00	16.8	19.1333	19.6	23.3333
2017-03-12	02:00:00	18.2	17.7333	17.2667	20.5333
2017-03-12	03:00:00	19.1333	19.1333	18.6667	15.4
2017-03-12	04:00:00	19.1333	19.6	17.7333	16.3333
2017-03-12	05:00:00	21	20.0667	20.0667	17.7333
2017-03-12	06:00:00	18.6667	17.7333	16.8	13.5333
2017-03-12	07:00:00	16.8	16.3333	14.4667	14
2017-03-12	08:00:00	14.9333	15.8667	11.6667	12.1333
2017-03-12	09:00:00	18.6667	19.1333	19.1333	21
2017-03-12	10:00:00	28.9333	31.7333	29.8667	33.1333
2017-03-12	11:00:00	35.4667	36.8667	36.8667	35.9333
2017-03-12	12:00:00	38.2667	38.7333	38.2667	37.3333
2017-03-12	13:00:00	35	40.1333	35.4667	39.6667
2017-03-12	14:00:00	39.2	40.1333	39.2	40.1333
2017-03-12	15:00:00	38.7333	42	38.7333	41.5333
2017-03-12	16:00:00	39.6667	42.4667	39.6667	40.1333
2017-03-12	17:00:00	39.2	42	39.2	40.6
2017-03-12	18:00:00	34.0667	38.2667	34.5333	38.2667
2017-03-12	19:00:00	28	31.2667	26.1333	34.0667
2017-03-12	20:00:00	22.8667	28	23.8	27.0667
2017-03-12	21:00:00	22.4	27.0667	22.8667	26.6
2017-03-12	22:00:00	22.8667	24.2667	21.4667	23.3333
2017-03-12	23:00:00	24.2667	23.3333	22.8667	20.0667
2017-03-13	00:00:00	20.0667	21.4667	17.7333	15.4
2017-03-13	01:00:00	12.1333	18.6667	13.0667	12.1333
2017-03-13	02:00:00	14.4667	20.5333	14.4667	10.7333
2017-03-13	03:00:00	14	19.6	14.9333	12.6
2017-03-13	04:00:00	10.7333	17.2667	12.6	11.6667
2017-03-13	05:00:00	7.46667	12.6	8.4	7.93333
2017-03-13	06:00:00	6.53333	9.8	7.93333	5.13333
2017-03-13	07:00:00	3.73333	7.46667	4.66667	4.2
2017-03-13	08:00:00	4.66667	5.13333	4.66667	5.13333
2017-03-13	09:00:00	10.7333	9.33333	9.33333	13.0667
2017-03-13	10:00:00	17.7333	13.0667	16.8	24.2667
2017-03-13	11:00:00	21.9333	18.2	23.3333	26.1333
2017-03-13	12:00:00	24.7333	28.9333	25.6667	28.9333
2017-03-13	13:00:00	30.3333	31.2667	29.4	29.8667
2017-03-13	14:00:00	33.6	35.9333	33.6	33.1333
2017-03-13	15:00:00	36.4	36.4	35.9333	37.3333
2017-03-13	16:00:00	37.8	39.6667	39.2	39.6667
2017-03-13	17:00:00	39.2	42	39.6667	40.1333
2017-03-13	18:00:00	41.5333	42	37.8	39.6667
2017-03-13	19:00:00	36.4	40.1333	37.3333	28
2017-03-13	20:00:00	15.4	25.2	22.4	11.6667
2017-03-13	21:00:00	10.2667	13.5333	—	6.06667
2017-03-13	22:00:00	6.53333	17.2667	4.2	3.26667
2017-03-13	23:00:00	12.6	21.4667	8.86667	1.86667
2017-03-14	00:00:00	17.7333	18.2	15.8667	1.86667
2017-03-14	01:00:00	24.2667	21	26.6	1.4
2017-03-14	02:00:00	25.6667	13.0667	22.8667	1.4
2017-03-14	03:00:00	9.33333	3.73333	2.33333	1.4
2017-03-14	04:00:00	2.33333	2.33333	2.33333	1.4
2017-03-14	05:00:00	1.4	7	1.86667	1.4
2017-03-14	06:00:00	1.4	1.4	1.86667	1.4
2017-03-14	07:00:00	1.86667	0.933333	2.33333	1.4
2017-03-14	08:00:00	3.26667	2.33333	2.33333	1.86667
2017-03-14	09:00:00	7.93333	12.6	5.13333	2.8
2017-03-14	10:00:00	21	21.4667	13.5333	13.5333
2017-03-14	11:00:00	27.5333	31.7333	24.7333	24.7333
2017-03-14	12:00:00	37.8	38.2667	35.4667	33.1333
2017-03-14	13:00:00	46.6667	49	48.0667	44.3333
2017-03-14	14:00:00	51.3333	52.7333	50.4	49.9333
2017-03-14	15:00:00	52.2667	53.6667	52.7333	52.2667
2017-03-14	16:00:00	52.7333	53.6667	52.2667	53.2
2017-03-14	17:00:00	53.2	55.0667	52.7333	53.2
2017-03-14	18:00:00	49.9333	54.1333	48.5333	52.2667
2017-03-14	19:00:00	42.9333	51.3333	39.6667	43.4
2017-03-14	20:00:00	35.9333	47.6	27.0667	34.0667
2017-03-14	21:00:00	23.8	38.2667	16.3333	20.0667
2017-03-14	22:00:00	22.4	16.3333	18.2	1.86667
2017-03-14	23:00:00	6.53333	3.73333	9.8	1.4
2017-03-15	00:00:00	7	7.46667	3.26667	1.4
2017-03-15	01:00:00	10.2667	14.4667	3.73333	2.33333
2017-03-15	02:00:00	25.6667	31.2667	12.1333	0.933333
2017-03-15	03:00:00	31.7333	29.4	27.0667	1.86667
2017-03-15	04:00:00	27.5333	23.8	21.9333	5.6
2017-03-15	05:00:00	22.8667	18.6667	18.6667	7.46667
2017-03-15	06:00:00	19.6	14	22.4	4.2
2017-03-15	07:00:00	15.4	13.0667	17.2667	1.4
2017-03-15	08:00:00	17.7333	29.4	14.4667	4.2
2017-03-15	09:00:00	20.5333	29.8667	21	7.46667
2017-03-15	10:00:00	28	34.5333	30.3333	24.7333
2017-03-15	11:00:00	35.4667	39.2	37.3333	36.4
2017-03-15	12:00:00	41.0667	44.3333	44.8	42.4667
2017-03-15	13:00:00	43.4	47.6	46.2	45.2667
2017-03-15	14:00:00	49.4667	52.2667	51.3333	48.5333
2017-03-15	15:00:00	48.5333	52.7333	51.3333	49
2017-03-15	16:00:00	51.3333	53.6667	52.7333	52.2667
2017-03-15	17:00:00	50.8667	53.2	51.8	50.4
2017-03-15	18:00:00	47.1333	52.2667	49.4667	48.5333
2017-03-15	19:00:00	—	50.4	47.1333	45.7333
2017-03-15	20:00:00	—	46.2	42.9333	39.2
2017-03-15	21:00:00	35.4667	43.4	40.1333	35.4667
2017-03-15	22:00:00	33.1333	—	42.4667	34.5333
2017-03-15	23:00:00	35.4667	—	34.0667	33.6
2017-03-16	00:00:00	35	37.8	35.4667	33.1333
2017-03-16	01:00:00	38.7333	40.1333	40.6	32.6667
2017-03-16	02:00:00	35	32.6667	31.2667	34.5333
2017-03-16	03:00:00	33.1333	33.1333	33.6	35
2017-03-16	04:00:00	30.8	28	16.3333	29.8667
2017-03-16	05:00:00	30.3333	30.8	12.6	28
2017-03-16	06:00:00	28.9333	31.2667	19.1333	23.8
2017-03-16	07:00:00	24.2667	28	25.6667	13.5333
2017-03-16	08:00:00	20.5333	23.8	19.1333	8.86667
2017-03-16	09:00:00	20.5333	24.7333	19.6	18.6667
2017-03-16	10:00:00	22.4	28	22.8667	23.3333
2017-03-16	11:00:00	20.5333	29.8667	30.3333	28.4667
2017-03-16	12:00:00	31.2667	35	29.4	29.8667
2017-03-16	13:00:00	39.6667	42.4667	38.2667	37.8
2017-03-16	14:00:00	45.2667	47.1333	44.8	45.7333
2017-03-16	15:00:00	48.5333	51.8	49	49
2017-03-16	16:00:00	52.2667	50.8667	52.7333	52.2667
2017-03-16	17:00:00	50.8667	—	48.5333	50.8667
2017-03-16	18:00:00	44.8	—	49	48.5333
2017-03-16	19:00:00	36.4	43.4	38.2667	42.9333
2017-03-16	20:00:00	34.5333	36.8667	33.6	31.7333
2017-03-16	21:00:00	28	36.4	30.8	23.3333
2017-03-16	22:00:00	26.6	32.6667	29.4	23.8
2017-03-16	23:00:00	24.2667	28.4667	23.8	17.7333
2017-03-17	00:00:00	28	28.4667	26.1333	14
2017-03-17	01:00:00	27.5333	23.3333	21.4667	16.8
2017-03-17	02:00:00	25.2	28	25.6667	22.8667
2017-03-17	03:00:00	24.2667	26.1333	26.1333	15.8667
2017-03-17	04:00:00	18.6667	22.4	22.8667	11.6667
2017-03-17	05:00:00	13.0667	12.6	12.1333	7.46667
2017-03-17	06:00:00	10.7333	15.4	4.2	2.33333
2017-03-17	07:00:00	7.46667	9.8	3.73333	1.4
2017-03-17	08:00:00	3.26667	4.66667	2.8	2.33333
2017-03-17	09:00:00	4.66667	4.66667	5.13333	4.66667
2017-03-17	10:00:00	10.2667	9.33333	11.6667	14.9333
2017-03-17	11:00:00	22.8667	23.3333	22.4	36.8667
2017-03-17	12:00:00	43.4	38.7333	46.2	48.5333
2017-03-17	13:00:00	53.6667	52.2667	53.6667	53.6667
2017-03-17	14:00:00	57.4	55.5333	54.6	56
2017-03-17	15:00:00	58.8	57.4	56.9333	56.4667
2017-03-17	16:00:00	57.8667	56	56.9333	56
2017-03-17	17:00:00	54.6	54.1333	52.7333	54.6
2017-03-17	18:00:00	52.2667	53.2	53.2	43.4
2017-03-17	19:00:00	48.5333	49.9333	44.8	42.9333
2017-03-17	20:00:00	43.4	37.3333	37.3333	24.2667
2017-03-17	21:00:00	24.2667	28	10.7333	14.4667
2017-03-17	22:00:00	3.73333	7.46667	2.8	1.86667
2017-03-17	23:00:00	1.86667	1.86667	2.33333	1.86667
2017-03-18	00:00:00	1.4	1.4	2.33333	1.4
2017-03-18	01:00:00	1.4	0.933333	2.33333	1.4
2017-03-18	02:00:00	0.933333	0.933333	1.86667	2.8
2017-03-18	03:00:00	3.26667	2.33333	1.86667	1.86667
2017-03-18	04:00:00	4.66667	7.46667	2.33333	1.86667
2017-03-18	05:00:00	3.26667	3.73333	2.33333	1.4
2017-03-18	06:00:00	2.8	1.4	1.86667	1.4
2017-03-18	07:00:00	0.933333	0.933333	2.33333	1.4
2017-03-18	08:00:00	2.33333	2.33333	2.33333	2.33333
2017-03-18	09:00:00	5.6	3.73333	4.2	7
2017-03-18	10:00:00	9.33333	9.33333	7	9.33333
2017-03-18	11:00:00	28	27.5333	28.9333	32.2
2017-03-18	12:00:00	38.2667	37.8	29.4	40.1333
2017-03-18	13:00:00	49	49.9333	48.0667	48.5333
2017-03-18	14:00:00	55.0667	56.9333	56.4667	56.4667
2017-03-18	15:00:00	59.2667	58.8	59.7333	58.3333
2017-03-18	16:00:00	59.7333	61.6	61.1333	29.8667
2017-03-18	17:00:00	57.4	61.6	58.3333	54.6
2017-03-18	18:00:00	55.5333	58.3333	56	56.9333
2017-03-18	19:00:00	45.7333	52.7333	44.8	51.3333
2017-03-18	20:00:00	32.6667	29.8667	27.0667	40.1333
2017-03-18	21:00:00	7.93333	28	17.7333	16.3333
2017-03-18	22:00:00	9.8	20.0667	17.2667	9.33333
2017-03-18	23:00:00	33.1333	28.9333	23.3333	3.26667
2017-03-19	00:00:00	26.1333	32.6667	4.2	5.6
2017-03-19	01:00:00	24.2667	31.7333	2.8	1.86667
2017-03-19	02:00:00	23.8	40.1333	4.2	1.4
2017-03-19	03:00:00	35	42.4667	27.5333	1.86667
2017-03-19	04:00:00	41.0667	43.4	37.8	8.86667
2017-03-19	05:00:00	38.2667	41.5333	38.2667	18.6667
2017-03-19	06:00:00	31.2667	40.6	37.3333	25.2
2017-03-19	07:00:00	35.9333	43.4	32.2	28
2017-03-19	08:00:00	32.6667	43.8667	31.2667	21
2017-03-19	09:00:00	41.0667	43.4	37.3333	27.0667
2017-03-19	10:00:00	49.4667	51.3333	47.6	42
2017-03-19	11:00:00	57.4	59.2667	56.9333	54.1333
2017-03-19	12:00:00	57.8667	63.4667	60.2	56.4667
2017-03-19	13:00:00	60.6667	63.4667	62.0667	58.8
2017-03-19	14:00:00	62.0667	64.8667	63.4667	59.7333
2017-03-19	15:00:00	62.0667	63.9333	62.0667	59.2667
2017-03-19	16:00:00	59.2667	63	60.6667	56.9333
2017-03-19	17:00:00	56	61.6	59.7333	55.5333
2017-03-19	18:00:00	53.6667	59.7333	56	53.6667
2017-03-19	19:00:00	48.0667	57.4	50.8667	49.4667
2017-03-19	20:00:00	43.4	56.9333	49.4667	43.4
2017-03-19	21:00:00	45.2667	55.5333	44.8	42
2017-03-19	22:00:00	49.9333	56	44.8	43.4
2017-03-19	23:00:00	51.3333	53.2	49.4667	38.2667
2017-03-20	00:00:00	48.0667	49.4667	45.2667	17.7333
2017-03-20	01:00:00	49	53.2	47.6	6.53333
2017-03-20	02:00:00	49.4667	50.4	47.6	12.6
2017-03-20	03:00:00	50.4	51.8	47.6	22.8667
2017-03-20	04:00:00	51.3333	52.2667	47.6	35.9333
2017-03-20	05:00:00	48.5333	53.2	51.3333	40.6
2017-03-20	06:00:00	48.5333	52.2667	48.0667	42
2017-03-20	07:00:00	48.5333	46.2	42.4667	34.0667
2017-03-20	08:00:00	38.2667	38.2667	38.2667	31.2667
2017-03-20	09:00:00	37.3333	45.7333	33.1333	32.2
2017-03-20	10:00:00	38.2667	44.3333	38.2667	42.9333
2017-03-20	11:00:00	42.9333	42.4667	43.4	41.0667
2017-03-20	12:00:00	44.8	42.9333	44.8	42
2017-03-20	13:00:00	45.7333	42.4667	45.2667	42.9333
2017-03-20	14:00:00	47.6	51.8	45.7333	44.3333
2017-03-20	15:00:00	48.5333	51.8	42.4667	47.6
2017-03-20	16:00:00	48.5333	53.2	46.2	47.6
2017-03-20	17:00:00	49	44.3333	47.1333	49.4667
2017-03-20	18:00:00	44.3333	35.9333	46.2	49
2017-03-20	19:00:00	32.6667	32.2	35.4667	45.2667
2017-03-20	20:00:00	14.9333	31.7333	15.4	31.7333
2017-03-20	21:00:00	17.7333	33.1333	4.66667	4.2
2017-03-20	22:00:00	11.6667	22.8667	2.33333	1.4
2017-03-20	23:00:00	3.73333	10.2667	2.33333	1.4
2017-03-21	00:00:00	1.86667	3.26667	2.33333	1.4
2017-03-21	01:00:00	2.33333	1.86667	1.86667	1.4
2017-03-21	02:00:00	1.4	1.86667	1.86667	1.4
2017-03-21	03:00:00	0.933333	0.933333	1.86667	0.933333
2017-03-21	04:00:00	0.933333	0.933333	1.86667	1.4
2017-03-21	05:00:00	0.933333	0.933333	2.33333	1.4
2017-03-21	06:00:00	1.4	0.933333	1.86667	1.4
2017-03-21	07:00:00	1.4	0.933333	1.86667	1.4
2017-03-21	08:00:00	1.86667	1.86667	2.33333	1.86667
2017-03-21	09:00:00	3.73333	7	3.26667	2.33333
2017-03-21	10:00:00	15.4	22.4	6.53333	7.93333
2017-03-21	11:00:00	35.9333	36.4	24.2667	29.8667
2017-03-21	12:00:00	42.4667	43.4	38.2667	44.8
2017-03-21	13:00:00	48.0667	49.4667	47.6	48.0667
2017-03-21	14:00:00	49.9333	53.2	48.0667	50.4
2017-03-21	15:00:00	50.8667	54.1333	50.4	51.3333
2017-03-21	16:00:00	52.2667	54.6	53.2	51.8
2017-03-21	17:00:00	52.2667	56	53.6667	52.7333
2017-03-21	18:00:00	50.8667	56.9333	53.2	54.1333
2017-03-21	19:00:00	46.2	56	46.2	49
2017-03-21	20:00:00	43.4	48.5333	38.2667	44.3333
2017-03-21	21:00:00	43.8667	49.4667	35.9333	42.9333
2017-03-21	22:00:00	34.5333	48.5333	35	39.6667
2017-03-21	23:00:00	35.9333	48.0667	33.6	32.2
2017-03-22	00:00:00	40.6	47.6	35.9333	30.3333
2017-03-22	01:00:00	33.1333	46.6667	38.2667	37.3333
2017-03-22	02:00:00	42	44.8	42.4667	28.4667
2017-03-22	03:00:00	40.6	43.4	40.1333	28.9333
2017-03-22	04:00:00	41.5333	42	24.2667	38.2667
2017-03-22	05:00:00	41.5333	42.9333	24.7333	39.6667
2017-03-22	06:00:00	39.2	42	36.8667	31.2667
2017-03-22	07:00:00	22.4	38.2667	31.7333	31.7333
2017-03-22	08:00:00	33.1333	36.8667	27.0667	21
2017-03-22	09:00:00	32.2	34.5333	30.3333	28.9333
2017-03-22	10:00:00	33.1333	38.2667	32.2	36.4
2017-03-22	11:00:00	33.1333	37.3333	23.8	36.4
2017-03-22	12:00:00	31.2667	34.5333	27.5333	33.6
2017-03-22	13:00:00	30.3333	34.0667	29.8667	32.6667
2017-03-22	14:00:00	37.8	41.0667	37.8	36.4
2017-03-22	15:00:00	42.4667	45.2667	42	41.5333
2017-03-22	16:00:00	43.4	47.1333	45.2667	39.6667
2017-03-22	17:00:00	41.5333	46.6667	42	40.1333
2017-03-22	18:00:00	41.0667	45.2667	39.6667	41.0667
2017-03-22	19:00:00	35	42	33.1333	35
2017-03-22	20:00:00	30.8	39.6667	33.1333	31.2667
2017-03-22	21:00:00	—	39.2	33.6	28
2017-03-22	22:00:00	33.6	39.6667	35.4667	29.8667
2017-03-22	23:00:00	32.6667	36.8667	34.0667	32.2
2017-03-23	00:00:00	34.0667	35	34.0667	31.2667
2017-03-23	01:00:00	33.6	34.5333	33.1333	28.9333
2017-03-23	02:00:00	33.6	34.0667	34.5333	29.4
2017-03-23	03:00:00	34.5333	33.6	30.3333	31.2667
2017-03-23	04:00:00	33.1333	34.0667	29.8667	30.3333
2017-03-23	05:00:00	32.6667	34.5333	27.5333	32.6667
2017-03-23	06:00:00	28.9333	32.6667	30.8	30.3333
2017-03-23	07:00:00	26.6	33.1333	29.4	31.2667
2017-03-23	08:00:00	25.6667	32.2	28	28
2017-03-23	09:00:00	24.2667	28.4667	23.3333	28.9333
2017-03-23	10:00:00	25.2	28	22.4	21.9333
2017-03-23	11:00:00	25.2	29.8667	22.4	25.2
2017-03-23	12:00:00	26.1333	30.8	24.7333	28.9333
2017-03-23	13:00:00	27.0667	33.1333	30.3333	30.3333
2017-03-23	14:00:00	31.2667	35.9333	33.1333	33.1333
2017-03-23	15:00:00	38.2667	38.7333	38.2667	38.7333
2017-03-23	16:00:00	44.8	42.4667	43.8667	44.3333
2017-03-23	17:00:00	46.2	41.0667	46.6667	45.7333
2017-03-23	18:00:00	42	40.6	41.5333	43.4
2017-03-23	19:00:00	42.4667	41.0667	38.2667	39.6667
2017-03-23	20:00:00	35	39.2	35	21.9333
2017-03-23	21:00:00	28	37.3333	35	24.2667
2017-03-23	22:00:00	32.2	34.5333	22.8667	27.5333
2017-03-23	23:00:00	26.1333	23.3333	28	24.2667
2017-03-24	00:00:00	23.8	24.7333	29.8667	18.6667
2017-03-24	01:00:00	26.6	31.7333	25.6667	27.0667
2017-03-24	02:00:00	31.2667	31.7333	28	29.4
2017-03-24	03:00:00	30.8	30.8	29.4	24.7333
2017-03-24	04:00:00	29.4	30.8	30.8	22.8667
2017-03-24	05:00:00	28	28.4667	27.5333	23.8
2017-03-24	06:00:00	23.8	23.3333	23.8	22.8667
2017-03-24	07:00:00	15.8667	21.4667	13.5333	12.6
2017-03-24	08:00:00	28	24.2667	20.5333	28
2017-03-24	09:00:00	33.1333	31.7333	28	32.2
2017-03-24	10:00:00	35.9333	35.4667	34.0667	35.9333
2017-03-24	11:00:00	37.3333	37.3333	37.8	37.3333
2017-03-24	12:00:00	38.2667	38.2667	37.8	36.8667
2017-03-24	13:00:00	38.7333	38.2667	38.2667	37.3333
2017-03-24	14:00:00	38.2667	38.2667	38.2667	36.8667
2017-03-24	15:00:00	39.2	39.6667	38.2667	37.8
2017-03-24	16:00:00	39.6667	40.6	40.1333	38.2667
2017-03-24	17:00:00	36.8667	38.7333	38.2667	37.8
2017-03-24	18:00:00	36.8667	37.3333	35.4667	35
2017-03-24	19:00:00	34.5333	35.9333	31.7333	34.0667
2017-03-24	20:00:00	34.5333	34.5333	32.2	33.6
2017-03-24	21:00:00	32.2	32.6667	30.3333	32.6667
2017-03-24	22:00:00	29.8667	31.7333	28	29.8667
2017-03-24	23:00:00	30.8	31.7333	32.6667	29.8667
2017-03-25	00:00:00	24.7333	28	29.4	27.5333
2017-03-25	01:00:00	29.8667	33.1333	33.6	31.7333
2017-03-25	02:00:00	35	35.9333	36.8667	33.6
2017-03-25	03:00:00	35.9333	36.8667	37.3333	34.0667
2017-03-25	04:00:00	36.8667	36.8667	36.8667	34.0667
2017-03-25	05:00:00	36.4	35.9333	37.3333	34.0667
2017-03-25	06:00:00	35.9333	36.4	35.9333	33.1333
[truncated: 24,281 more rows]

## Sheet: Meteorological factors
	CS stie					EMB site				EMS site
Date	Time	Wind speed （m/s）	Wend direction (°)	Temperature (℃)	Relative humidity （%）	Wind speed （m/s）	Wend direction (°)	Temperature (℃)	Relative humidity （%）	Wind speed （m/s）	Wend direction (°)	Temperature (℃)	Relative humidity （%）
2019-05-01	00:00:00	0.9	110.2	13.2	24	1.2	73.3	13.7	20	0.4	7.2	13.2	24
2019-05-01	01:00:00	0.9	30.1	10.8	39	1	59.3	12.7	24	0.7	306.7	11.4	33
2019-05-01	02:00:00	0.7	15.3	9.4	45	0.9	45	11.9	27	0.8	282.8	9.6	40
2019-05-01	03:00:00	0.9	45.5	8.7	46	0.6	51.4	11.5	26	0.8	269	9.4	39
2019-05-01	04:00:00	0.9	23.3	7.4	49	0.8	71.8	10.8	30	0.4	352.6	9.2	38
2019-05-01	05:00:00	0.8	22.6	6.6	54	0.8	67.5	9.6	36	0.4	324.2	8.7	40
2019-05-01	06:00:00	0.9	38.5	5.2	61	0.5	325.7	7.8	47	0.9	309.4	6.5	49
2019-05-01	07:00:00	0.9	3.7	5.5	62	0.6	41.3	7.6	50	0.7	325.6	6.6	48
2019-05-01	08:00:00	0.8	11.3	8.2	56	0.6	47.5	10.2	42	0.5	315.9	9.6	44
2019-05-01	09:00:00	1	206.7	12.9	37	0.9	143.7	13.6	27	0.7	130.7	13.7	30
2019-05-01	10:00:00	3.2	216.5	15.7	21	2.6	178.5	15	20	1.5	130.8	15.7	20
2019-05-01	11:00:00	4.3	229.8	16.5	19	3.9	194.8	16.1	16	1.8	157.7	16.9	16
2019-05-01	12:00:00	4.2	234.1	17.2	20	3.7	197.8	16.7	18	1.8	155.5	17.7	18
2019-05-01	13:00:00	3.8	229.3	18.4	20	3.4	198.7	18.1	17	1.7	149.7	18.6	17
2019-05-01	14:00:00	3.2	235.1	19	20	3	180.6	18.6	18	1.8	134.6	19.3	18
2019-05-01	15:00:00	2.7	232.8	20.1	20	2.6	187.9	19.5	17	1.5	137.5	20.3	18
2019-05-01	16:00:00	2.4	229	20.4	20	2.8	193.2	20	17	1.5	121.7	20.6	17
2019-05-01	17:00:00	2.3	227.8	20.7	20	2.7	197.2	20	18	1.4	143.7	20.7	18
2019-05-01	18:00:00	2.1	229.5	20.6	21	2.2	187.3	20.2	18	1.4	131.1	20.4	18
2019-05-01	19:00:00	3.6	230.1	19.6	23	3.1	198.3	19.3	21	1.3	176.4	19.8	20
2019-05-01	20:00:00	3.6	228.5	18.6	26	2.8	195.2	18.3	23	1.1	188.4	18.4	23
2019-05-01	21:00:00	2.8	237.4	17.6	28	2.8	211.3	17	26	1.1	233.6	17.2	26
2019-05-01	22:00:00	1.8	249.3	15.9	36	2.5	219.7	16	33	1	245.6	15.7	34
2019-05-01	23:00:00	2.5	235.3	14.7	48	2.4	213.2	14.8	45	1	241	14.3	47
2019-05-02	00:00:00	2.8	233.8	14.1	52	2.7	207.4	13.8	49	0.8	220.6	13.7	50
2019-05-02	01:00:00	2	230.2	13.3	54	2	203.2	13.1	51	0.6	197.8	13	51
2019-05-02	02:00:00	2	228.2	12.5	57	1.9	209.1	12.2	55	0.8	223.8	12.4	54
2019-05-02	03:00:00	2	221.4	11.6	61	1.8	200.7	11.3	58	0.6	162.6	11.4	58
2019-05-02	04:00:00	1.6	225.1	10.6	66	1.4	176.5	10.3	63	0.8	97.3	10.5	62
2019-05-02	05:00:00	0.9	212.5	9.5	70	1.6	172.1	9.6	66	1	107.7	9.6	67
2019-05-02	06:00:00	0.8	202.4	8.8	76	1.4	173	8.9	71	1	99.6	9	71
2019-05-02	07:00:00	1.6	204.6	8.6	79	1.4	162.9	8.7	74	1	111	8.8	74
2019-05-02	08:00:00	2.6	226.4	9.8	77	2	191.2	9.4	74	1.2	127	10.2	71
2019-05-02	09:00:00	2.7	228.9	11.2	74	1.9	186.5	11	69	1.1	117.4	12	65
2019-05-02	10:00:00	2	225	14	64	1.7	160.4	13.5	61	1.5	101.7	13.9	60
2019-05-02	11:00:00	3.4	229.2	15.8	54	2.8	194.4	15.6	52	1.3	168.6	16.5	49
2019-05-02	12:00:00	3.4	227.4	18	39	3	183.6	17.4	38	1.7	120.2	18.3	37
2019-05-02	13:00:00	3.8	221.5	19.5	28	3.9	180.7	18.6	24	2.2	140.6	19.6	24
2019-05-02	14:00:00	3.5	218.1	20.5	24	4.2	194.3	19.5	21	1.9	163.8	20.8	22
2019-05-02	15:00:00	5	230.8	20.6	23	4	167.8	20	20	2.4	136.2	20.9	20
2019-05-02	16:00:00	3.8	221	21.5	21	3.9	179.8	20.6	20	2.4	108	21.3	20
2019-05-02	17:00:00	3.3	223.2	21.9	21	3.3	189.1	21.2	20	1.6	138.7	21.9	19
2019-05-02	18:00:00	3.3	218.5	21.8	23	3.5	186.5	21.2	20	1.6	114.2	21.8	20
2019-05-02	19:00:00	2.5	218.9	21.4	24	2.7	174.4	20.9	22	1.6	137	21.2	22
2019-05-02	20:00:00	1.3	204.4	20.1	27	2	163.5	20	24	1.2	108.4	19.9	25
2019-05-02	21:00:00	1	198.1	18.6	31	1.2	156.3	19	26	1	101	18.9	28
2019-05-02	22:00:00	0.8	170.7	17.6	33	0.8	154	18.1	28	0.8	103.2	17.9	30
2019-05-02	23:00:00	0.6	148.1	16.9	34	0.6	186.8	17.4	29	0.5	90.9	17.4	31
2019-05-03	00:00:00	0.9	196.7	16.3	36	1.8	168.2	17.1	29	1	107	16.9	31
2019-05-03	01:00:00	0.8	209.1	15.9	40	2.1	173.4	16.4	35	1.1	103.7	16.3	36
2019-05-03	02:00:00	1	207	15.5	46	1.7	183.6	15.7	42	0.9	102.2	15.6	43
2019-05-03	03:00:00	1	209.7	14.8	52	1.7	166.8	15	48	1.1	99.1	14.9	49
2019-05-03	04:00:00	1.7	210	14.4	56	1.9	179.5	14.4	52	1.1	107.2	14.2	54
2019-05-03	05:00:00	1.4	216.8	14.2	60	1.9	178.2	14.3	56	1.1	100.8	14.2	56
2019-05-03	06:00:00	1	207.5	14	62	1.7	165.2	14.2	57	0.9	104.5	14	59
2019-05-03	07:00:00	1.5	217.4	14.4	61	2	169	14.3	57	1.2	109.6	14.2	58
2019-05-03	08:00:00	2.1	216.8	15.2	57	2.8	166.3	14.9	54	1.4	108.2	15	54
2019-05-03	09:00:00	2.3	218	15.9	55	3	171.3	15.5	52	1.4	117.7	15.7	52
2019-05-03	10:00:00	3.4	220.5	17.1	51	3.1	169.9	16.6	49	1.8	117.4	17	48
2019-05-03	11:00:00	3.9	221	18.2	48	3	181.9	17.8	46	1.8	128.9	18.4	45
2019-05-03	12:00:00	4	222.4	18.7	48	3.2	197.2	18.4	45	1.5	139.9	18.9	44
2019-05-03	13:00:00	2.9	225.4	19.8	47	2.7	175	19.3	44	1.7	135.1	19.8	43
2019-05-03	14:00:00	3.8	227.3	20.8	44	3.4	181.9	20.5	41	1.7	147.9	21.2	40
2019-05-03	15:00:00	2.5	216.8	21.5	43	2.5	182.5	21.2	40	1.8	117	21.5	40
2019-05-03	16:00:00	2.7	219.6	22	42	2.7	167.9	21.5	39	1.6	122.1	21.6	40
2019-05-03	17:00:00	3.2	216.4	22.1	42	2.7	178.1	21.6	39	1.6	141.3	21.9	39
2019-05-03	18:00:00	3.5	220.1	21.8	42	3.2	196.8	21.4	39	2.1	157.6	21.6	40
2019-05-03	19:00:00	4	267.6	18	64	4.4	240	17.5	62	3.7	250.1	17.6	62
2019-05-03	20:00:00	3	290.7	15.9	77	5.1	240	16	71	3.9	261	15.7	74
2019-05-03	21:00:00	1.6	232.7	15.5	82	2.3	225.4	16.5	68	0.6	223.2	15.2	79
2019-05-03	22:00:00	2	235.6	15.8	81	2.3	205.3	16	72	0.6	208.9	15.5	77
2019-05-03	23:00:00	1.5	221	15.4	82	1.8	200.9	15.4	75	0.4	212	15.2	78
2019-05-04	00:00:00	0.9	215.3	14.9	83	1.5	212.2	14.8	77	0.5	188	14.8	79
2019-05-04	01:00:00	0.7	228.9	14.4	85	1.1	223.8	14.1	80	0.5	248.6	14.4	80
2019-05-04	02:00:00	0.5	199.5	13.6	89	0.9	199.7	13.7	81	0.4	204.3	13.8	82
2019-05-04	03:00:00	0.9	218.1	13	90	0.7	190	13	83	0.6	129.9	13.1	84
2019-05-04	04:00:00	1.7	216.9	12.7	91	1	201.3	12.6	84	0.6	153.4	12.6	85
2019-05-04	05:00:00	2.1	221.8	12.2	94	1.3	185.6	12	87	0.7	126.8	12	88
2019-05-04	06:00:00	1.3	224.7	11.7	96	1.2	188.1	11.6	89	0.7	111.3	11.6	89
2019-05-04	07:00:00	0.8	218.9	11.8	96	0.9	185.9	11.9	88	0.8	99.8	11.9	89
2019-05-04	08:00:00	2.1	221.6	13	92	1.7	209.2	13	84	1	119.5	13.5	83
2019-05-04	09:00:00	2.3	222.2	14.4	86	2.5	201.9	14	80	1.2	166.8	14.7	78
2019-05-04	10:00:00	1.7	226	16.1	78	1.4	186	15.7	73	1.2	123.8	16.1	72
2019-05-04	11:00:00	1.5	218.9	17.8	71	1.4	161.6	17.2	67	1.2	136.2	17.4	67
2019-05-04	12:00:00	1.9	222.5	19.1	64	2.1	183.8	18.3	62	1.3	109.1	18.9	61
2019-05-04	13:00:00	2.7	243.5	19.8	61	2.3	205.5	19.4	58	1.4	153.3	20.3	55
2019-05-04	14:00:00	2.2	232.6	21.2	56	1.9	204.1	20.8	52	1.3	100.3	21.1	52
2019-05-04	15:00:00	2.1	262.9	22.2	51	1.3	193.3	22.5	45	1.2	158.3	22.5	46
2019-05-04	16:00:00	2	255.2	23.4	46	1.5	215.9	23.2	40	1.1	155.6	23.5	42
2019-05-04	17:00:00	2.3	250.9	23.8	43	1.9	212.4	23.6	40	1.3	230.3	24.2	39
2019-05-04	18:00:00	1.9	32.7	24	41	1.6	14.8	24.1	35	1.8	345.4	23.9	37
2019-05-04	19:00:00	2.5	56.2	21.1	46	3.5	26.4	20.8	44	2.3	348.8	20.5	45
2019-05-04	20:00:00	4	121.2	21.1	46	1.6	68.8	20.3	45	2	56.1	20.7	44
2019-05-04	21:00:00	1.9	138.1	19.9	50	1.2	128.5	19.8	46	1.2	103.4	19.9	46
2019-05-04	22:00:00	1.1	5.1	19.4	51	0.6	333.2	19.4	48	0.6	318.9	19.6	47
2019-05-04	23:00:00	0.8	38.6	18.5	55	0.8	24.1	18.9	50	0.9	339.3	18.2	54
2019-05-05	00:00:00	1	81.1	18.4	54	1	74.4	18.6	50	0.5	36	18.5	52
2019-05-05	01:00:00	1.2	16.4	17.7	56	0.8	74	18.5	48	0.8	332.6	17.7	54
2019-05-05	02:00:00	1.4	6.2	16.3	65	1.1	355.5	17.3	55	1.2	322.8	16.7	59
2019-05-05	03:00:00	1.5	51.5	16.9	52	1.7	53.6	17	50	1.2	9.4	17	49
2019-05-05	04:00:00	2.2	77.3	16.6	39	2	63.5	16.7	35	1.7	12	16.6	37
2019-05-05	05:00:00	1.9	70.1	15.8	34	2	55.6	15.9	31	1.5	357.3	15.7	32
2019-05-05	06:00:00	2.2	70.7	15.2	33	2.3	65.7	15.2	30	1.5	2.6	15	32
2019-05-05	07:00:00	2.5	73.4	14.6	34	2.4	63.7	14.7	31	1.8	10.3	14.5	32
2019-05-05	08:00:00	2.9	77.1	14.6	36	2.7	66.6	14.6	33	2.1	16.2	14.5	34
2019-05-05	09:00:00	2.6	79.1	15	36	2.9	67	15.1	33	2.8	43.2	15	34
2019-05-05	10:00:00	3.4	85.5	15.4	36	3.9	73.2	15.2	33	3.1	46.7	15.3	33
2019-05-05	11:00:00	4.1	91	15.8	36	3.5	70.3	15.7	33	2.9	48.7	15.9	34
2019-05-05	12:00:00	3.4	94.1	17	34	3	70.5	16.9	31	2.7	45.6	17	32
2019-05-05	13:00:00	3.4	107.2	17.9	32	2.8	71.1	17.8	29	2.6	52.7	18	29
2019-05-05	14:00:00	3.1	108.2	19.1	30	2.6	72.4	18.8	26	2.4	53	19.1	26
2019-05-05	15:00:00	2.9	113.4	20.3	28	2.4	74.5	19.9	25	2.2	50.3	20.2	26
2019-05-05	16:00:00	3	109.5	20.8	27	2.3	70.9	20.8	24	2.1	54.3	20.9	24
2019-05-05	17:00:00	2.8	114	21.3	25	2.7	73.9	21.2	22	2.2	56.4	21.4	22
2019-05-05	18:00:00	2.9	88.9	21.2	25	2.4	73.8	20.9	22	2.7	46.9	21.1	22
2019-05-05	19:00:00	2.9	96.5	20.3	25	2.9	69.5	20.1	22	2.5	52.2	20.2	23
2019-05-05	20:00:00	2.5	91.9	19.2	25	2.7	73.8	19.1	22	2.2	47.1	19.2	22
2019-05-05	21:00:00	2.4	97.7	18	26	2.6	69.9	18.1	23	2.1	45.2	18	23
2019-05-05	22:00:00	2.2	78.4	17	25	2.4	64.2	17.1	22	2.2	42.4	17.1	22
2019-05-05	23:00:00	1.8	72.6	16.1	26	1.7	57.6	16.1	23	1.7	30	16.2	23
2019-05-06	00:00:00	1.4	77.1	15.2	28	1.8	69.3	15.4	25	1.4	37.3	15.3	26
2019-05-06	01:00:00	1.2	87.2	14.6	28	1	65.3	14.8	25	1.3	44.3	14.7	26
2019-05-06	02:00:00	1	71.5	14	29	1.2	67.6	14.2	27	1.1	35	14.1	26
2019-05-06	03:00:00	1.2	68.3	13.3	31	1.2	64.8	13.6	28	0.8	11.2	13.4	28
2019-05-06	04:00:00	0.9	60.7	12.9	34	0.8	61.7	13.2	31	0.7	350.7	12.9	32
2019-05-06	05:00:00	1.1	4.5	12.2	39	0.8	53.3	13	34	0.8	329.2	12.2	35
2019-05-06	06:00:00	0.8	5.6	11.9	42	0.8	65.4	12.7	37	0.4	337.2	12	38
2019-05-06	07:00:00	0.9	130.9	12.6	44	0.8	77.7	12.9	40	0.6	59.2	13	40
2019-05-06	08:00:00	1.3	139	13.1	45	0.8	102.4	13.2	41	1.2	80.5	13.3	42
2019-05-06	09:00:00	1.4	157	13.8	46	1.3	125.4	14	45	1.1	85.8	14	44
2019-05-06	10:00:00	1.8	194.2	15.1	49	1.8	147.9	14.9	49	1.4	105.6	15.1	48
2019-05-06	11:00:00	2.3	208.5	16.4	50	2.9	174	15.8	49	1.6	122	16.4	48
2019-05-06	12:00:00	3.2	225	16.6	51	2.8	174.5	16.2	49	1.6	128.1	16.6	47
2019-05-06	13:00:00	2	223.9	16.8	50	2.4	189.6	16.7	48	1.2	134.7	16.9	47
2019-05-06	14:00:00	2	211.4	17.1	50	2	185.7	17	47	1.3	111.4	17.2	47
2019-05-06	15:00:00	2.6	222.1	17.7	49	2.9	191.8	17.4	46	1.1	169.8	17.9	46
2019-05-06	16:00:00	2.7	225.7	17.8	48	2.4	181.9	17.5	43	1.1	173.2	18	44
2019-05-06	17:00:00	3.3	226.8	17.6	45	2.4	192.5	17.4	42	1.4	130.6	17.8	42
2019-05-06	18:00:00	2.6	223.2	17.5	45	2.5	176.3	17.2	42	1.2	149.8	17.5	42
2019-05-06	19:00:00	2.9	219.4	17	45	2.6	171	16.7	41	1.3	111.8	16.9	42
2019-05-06	20:00:00	2.6	221.6	16.5	44	3	164.7	16.2	41	1.4	111.2	16.2	42
2019-05-06	21:00:00	1.7	218	15.8	45	2.2	167.2	15.5	42	1.1	116.9	15.6	43
2019-05-06	22:00:00	1.7	219	15.2	47	2.2	181.9	15	44	1	130	15.1	45
2019-05-06	23:00:00	1.9	219.9	14.8	48	1.8	208.6	14.7	46	0.6	192	15	44
2019-05-07	00:00:00	2.6	227.1	14.6	49	2.2	201.9	14.4	47	0.6	210.3	14.6	46
2019-05-07	01:00:00	1.9	228.8	14.2	53	1.9	217.3	13.9	50	0.6	199.5	14.2	49
2019-05-07	02:00:00	1.7	234.7	13.8	57	1.5	210.2	13.6	54	0.4	190.8	13.9	52
2019-05-07	03:00:00	1.3	228.5	13.5	59	1.3	202.3	13.3	56	0.4	217.1	13.6	56
2019-05-07	04:00:00	0.9	175.7	12.9	61	0.6	199.6	12.9	58	0.5	116.7	13	58
2019-05-07	05:00:00	0.5	189.9	12.6	63	0.3	227.9	12.8	59	0.5	122	12.8	59
2019-05-07	06:00:00	0.9	222.3	12.3	64	1.1	210	12.2	61	0.4	200.7	12.5	62
2019-05-07	07:00:00	0.7	174.7	12	65	0.6	196.3	12.2	61	0.6	107.6	12.3	62
2019-05-07	08:00:00	0.9	220.1	12.5	64	0.9	154.2	12.4	61	0.8	99.5	12.4	61
2019-05-07	09:00:00	1.7	225.5	13.2	65	1.6	219.4	13	62	1	120.5	13.4	60
2019-05-07	10:00:00	1.5	232.4	14.7	61	1.4	194.5	14.3	59	1	107.3	14.9	57
2019-05-07	11:00:00	1.9	246	15.8	59	1.1	155.8	16	53	1.1	108.2	16	54
2019-05-07	12:00:00	2.6	233.2	16.8	52	1.7	197.8	16.6	48	1.2	158.5	17.3	46
2019-05-07	13:00:00	3.5	229.3	17	49	3.6	201.8	16.5	44	1.5	176.3	17.5	43
2019-05-07	14:00:00	4.1	232.9	17	44	3.8	197.7	16.5	40	1.6	194.9	17.5	38
2019-05-07	15:00:00	4.4	229.7	16.8	42	3.4	201	16.6	39	1.5	173.8	17.6	37
2019-05-07	16:00:00	4	235.7	16.6	41	3.1	200.6	16.4	38	1.5	179.4	17.2	37
2019-05-07	17:00:00	2.6	243.3	16.4	44	3	215.1	16.2	40	1.2	211.5	16.7	40
2019-05-07	18:00:00	2.8	264.1	15.8	51	2.8	239.3	15.7	49	2.2	260.9	15.9	49
2019-05-07	19:00:00	2.5	289.1	14.8	62	2.4	238.1	14.7	58	2.6	257.3	14.9	59
2019-05-07	20:00:00	2.6	287.7	13.8	65	3.3	245.5	13.8	60	2.8	252.3	13.9	61
2019-05-07	21:00:00	2.9	268.5	12.6	71	3.7	239	12.7	65	2.6	252.9	12.6	68
2019-05-07	22:00:00	3.5	250.7	11.8	71	3.7	224.9	11.6	68	1.8	249.7	11.8	67
2019-05-07	23:00:00	3.3	250.8	10.8	79	3.6	219	10.5	77	1.6	231.4	10.8	74
2019-05-08	00:00:00	3.6	235	10.2	86	2.6	225.7	9.9	82	1.4	224.6	10.2	79
2019-05-08	01:00:00	3.4	229.5	9.6	91	2.8	210.7	9.4	85	1.2	217.1	9.6	83
2019-05-08	02:00:00	3.1	242.4	9.3	91	2.6	224.6	9	86	0.8	240.8	9.3	84
2019-05-08	03:00:00	3.1	233.8	9	84	3	213.1	8.6	80	0.9	199.9	9	78
2019-05-08	04:00:00	2.4	231	8.7	84	2.1	210.4	8.5	79	0.8	197.4	8.7	78
2019-05-08	05:00:00	1.5	226.9	8.4	86	0.9	180.7	8.4	82	0.6	186.7	8.6	79
2019-05-08	06:00:00	1.4	132	8.3	91	0.6	68.6	8.4	83	0.8	76.2	8.6	82
2019-05-08	07:00:00	1.1	139.8	8.3	92	0.8	87.9	8.4	83	0.9	78.4	8.5	82
2019-05-08	08:00:00	0.9	145.9	8.4	91	0.6	135.2	8.8	82	0.9	55.5	8.7	82
2019-05-08	09:00:00	1.2	117.6	8.8	88	0.8	59.3	9.2	80	0.8	42.8	9	80
2019-05-08	10:00:00	1.4	101.8	9	90	1.3	64.7	9.3	79	1.2	358.2	9.1	83
2019-05-08	11:00:00	1.2	76.1	9.5	90	1	69.3	10.1	80	1	12.6	9.5	84
2019-05-08	12:00:00	1.1	92.5	10.9	82	0.7	38.7	11.3	76	1	34.1	11	76
2019-05-08	13:00:00	1.6	91.2	11.5	79	1.3	57.9	11.8	70	1.2	19.6	11.4	75
2019-05-08	14:00:00	1.7	96	12	72	1.1	58.3	12.3	68	1.3	51.8	12	69
2019-05-08	15:00:00	1.4	44.6	12.7	67	1.3	40.9	13	62	1.4	337	12.6	65
2019-05-08	16:00:00	1.2	358.2	13.6	64	1	353.2	13.5	60	1	325.5	13.6	61
2019-05-08	17:00:00	1.4	7.4	14.1	63	1.4	340.1	14.1	58	1.5	321.3	13.9	60
2019-05-08	18:00:00	2.2	59.3	13.8	69	2	21.3	14	61	2	359.6	13.6	65
2019-05-08	19:00:00	1.5	23.6	13	73	1.8	27.3	13	68	1.5	329.3	12.8	70
2019-05-08	20:00:00	1.2	350.2	12.3	80	1	296.7	12.3	74	1.2	289.6	12.3	75
2019-05-08	21:00:00	1.3	9.5	11.5	84	1	317.8	11.5	77	1.1	314.3	11.6	78
2019-05-08	22:00:00	1.2	16.3	10.8	88	1.8	299.8	10.7	80	1.3	285.1	11	80
2019-05-08	23:00:00	0.8	42	10.6	86	1.8	297.1	10.6	81	1.3	291.8	11.2	77
2019-05-09	00:00:00	0.8	35.6	10.6	86	1.3	307.6	11.1	79	1.6	302.7	11.2	78
2019-05-09	01:00:00	0.6	23.8	10.7	86	0.9	1.5	11.1	78	0.9	355.5	10.7	80
2019-05-09	02:00:00	0.9	15.1	10	88	1.7	40	10.3	81	1	344.9	10	83
2019-05-09	03:00:00	1.4	9.5	9.2	91	1.9	23	9.7	82	1.1	323.9	9	86
2019-05-09	04:00:00	0.9	345.6	8.2	94	0.7	309.4	8.9	82	0.7	318.6	8.4	86
2019-05-09	05:00:00	0.4	20.8	7.8	94	0.7	291.3	8.2	85	0.5	270.5	8.5	83
2019-05-09	06:00:00	0.6	15.3	7.6	92	0.6	286	8	81	0.6	291.8	8.5	81
2019-05-09	07:00:00	0.6	31.8	7.8	89	0.3	294.8	8.6	80	0.9	312.3	8.5	80
2019-05-09	08:00:00	1.4	358.8	9	85	0.9	347.1	10.1	75	1.1	323	9.6	77
2019-05-09	09:00:00	1.2	26.1	11.5	76	1	23.7	12.6	66	0.9	343.4	12.1	70
2019-05-09	10:00:00	1.4	299.8	13.9	64	0.8	12.9	14.8	55	0.9	338.5	14.6	56
2019-05-09	11:00:00	1.4	264.2	16	55	1	298.5	16.5	49	0.9	123.1	16.3	50
2019-05-09	12:00:00	1.3	207.4	17.8	47	1.2	219.2	17.8	42	1.1	261.7	17.7	43
2019-05-09	13:00:00	1.6	220	19.1	37	1.2	277.5	19.2	34	1.2	127.2	19.5	34
2019-05-09	14:00:00	2.2	261.9	20	33	1.6	207.8	20.2	29	1.2	326.8	20.4	29
2019-05-09	15:00:00	2	268	20.8	29	2.4	214.3	20.7	27	1.5	249.9	21.1	27
2019-05-09	16:00:00	2.1	212.4	20.3	31	2.1	160.6	19.8	29	1.6	117.4	20.2	29
2019-05-09	17:00:00	2	111.1	19.7	32	1.5	61.1	20	28	1.7	57.8	19.7	30
2019-05-09	18:00:00	1.9	128.3	20.2	30	1.7	144.2	19.8	28	1.4	72.9	20.1	27
2019-05-09	19:00:00	1.5	217.9	19.5	34	1	213.7	19.4	31	0.9	111.3	19.4	32
2019-05-09	20:00:00	1.4	267.9	19	35	2.3	208.3	19	31	0.6	223.1	19.1	33
2019-05-09	21:00:00	0.8	358.2	18.1	38	1.3	232.9	18.5	33	0.6	284.1	18.2	34
2019-05-09	22:00:00	2.1	272.4	17.8	42	2.3	246.4	17.5	41	2	249.7	17.8	40
2019-05-09	23:00:00	1.4	307.6	16.2	52	2.3	274.9	15.8	51	1.9	261.8	15.9	51
2019-05-10	00:00:00	0.7	345.2	15.3	57	1.8	290.1	14.7	56	1.3	264.6	15.4	53
2019-05-10	01:00:00	1.2	265.6	14.6	60	2.2	239.7	14.4	57	1.9	245.4	14.5	57
2019-05-10	02:00:00	1	253.9	13.6	66	2.2	246.2	13.5	63	1.1	258.3	13.3	64
2019-05-10	03:00:00	1	262.4	12.7	72	1.2	279.8	12.3	69	0.5	200.1	12.6	68
2019-05-10	04:00:00	0.8	309.4	12.2	74	1.4	283.3	11.6	73	1.1	261	12	72
2019-05-10	05:00:00	1	290.3	12.1	77	0.9	256	11.6	74	1.1	270.3	12	73
2019-05-10	06:00:00	0.9	305	11.6	79	1.1	256.3	11.4	75	1.5	271.7	11.5	75
2019-05-10	07:00:00	0.6	328.2	11.6	79	1	221.8	11.1	76	0.8	267.3	11.4	76
2019-05-10	08:00:00	1.5	281.2	12.2	77	1.4	276.5	12	73	1.1	261.6	12.1	73
2019-05-10	09:00:00	1.7	351.8	13.2	72	2.4	300.1	13.6	66	1.6	303.2	13.2	68
2019-05-10	10:00:00	2	348.4	13.5	71	2.4	312.7	13.5	66	2.1	297.1	13.4	67
2019-05-10	11:00:00	1.1	305.7	15.3	62	1.8	286.6	15.2	57	1.4	284.9	15.4	58
2019-05-10	12:00:00	2.2	309.5	17.4	52	2.1	273.3	17.5	48	2.4	276.8	17.4	50
2019-05-10	13:00:00	2.4	305.3	17.7	50	2.2	238.5	17.5	48	2.2	254.2	17.9	48
2019-05-10	14:00:00	2.6	273.3	16.9	56	1.9	243.4	16.3	57	2	258.7	16.7	55
2019-05-10	15:00:00	2.7	236.6	19	50	2	205.4	17.6	53	1.3	218.7	19.2	46
2019-05-10	16:00:00	2.9	239.6	19.4	48	3.2	224.2	18.5	47	1.4	242.8	19.6	44
2019-05-10	17:00:00	4	75.1	16.1	59	2.9	60.3	15.9	56	2.7	28.4	15.8	56
2019-05-10	18:00:00	2.6	195.5	13.9	72	1.6	152.8	12.9	70	1.2	130.4	13.5	71
2019-05-10	19:00:00	1.5	252.8	14.1	72	2	126.5	13.5	72	1.4	58.3	14.1	69
2019-05-10	20:00:00	1.3	23.3	15.3	64	1.6	184.6	14.1	70	0.8	351.7	15	64
2019-05-10	21:00:00	1.1	312.4	14.7	67	0.8	240.2	13.7	74	0.8	258.5	14.4	67
2019-05-10	22:00:00	1.4	235	13.8	78	1.1	215.1	13.3	76	0.4	209.1	13.6	72
2019-05-10	23:00:00	1.8	236.3	12.9	85	2.1	208.2	12.7	74	0.6	214.2	12.5	75
2019-05-11	00:00:00	1.1	250.8	12	86	1.5	209.7	12.3	73	0.4	205.2	12.1	75
2019-05-11	01:00:00	0.3	176.2	11.5	86	0.6	120.9	11.9	76	0.3	87	11.8	77
2019-05-11	02:00:00	0.5	270.4	11	89	0.7	224.9	11.1	82	0.3	170.2	11.6	79
2019-05-11	03:00:00	0.4	357.5	10.4	93	0.4	213.7	10.4	84	0.2	224.2	10.9	81
2019-05-11	04:00:00	0.6	12.5	9.5	95	0.7	220.9	9.5	87	0.4	250.3	10.3	84
2019-05-11	05:00:00	0.3	238.8	9.2	96	0.8	220.6	8.9	89	0.3	197.4	9.6	87
2019-05-11	06:00:00	0.5	312	8.9	97	0.4	219.5	8.7	89	0.2	212.7	9.3	88
2019-05-11	07:00:00	0.5	306	9.5	96	0.5	207	9.6	87	0.3	185.5	10.1	85
2019-05-11	08:00:00	1.4	225.3	11.4	82	0.6	220.1	11.5	79	0.5	173.2	12.2	77
2019-05-11	09:00:00	1.3	222.8	13.9	73	1.6	203.4	13.2	71	0.7	179.7	14.4	67
2019-05-11	10:00:00	1.5	233.3	16.8	62	1.5	217.9	16.5	57	0.9	224.8	17	56
2019-05-11	11:00:00	2	239.2	19.4	49	1.9	225.4	19.3	42	1.1	228.2	19.8	44
2019-05-11	12:00:00	2.7	258.5	21	39	2.1	248.9	21.1	33	1.7	257.3	21.3	36
2019-05-11	13:00:00	2.7	292.4	22	32	2.4	240.3	22.1	28	2.1	268.1	22.3	28
2019-05-11	14:00:00	2.6	295.5	22.9	29	2.8	302.8	22.6	26	2.6	273.3	23.2	26
2019-05-11	15:00:00	2.5	307.7	23.9	28	1.8	297.2	23.5	25	2.2	269.3	24	25
2019-05-11	16:00:00	2.3	288.9	24.5	25	2.3	232.3	24.3	22	2	267.9	24.4	22
2019-05-11	17:00:00	2.8	300	24.7	24	2.3	243.7	25.1	20	2	274.9	24.9	21
2019-05-11	18:00:00	2.8	258.1	25	23	2.6	230.9	24.8	20	2	257.2	25.4	20
2019-05-11	19:00:00	2.2	262.4	24.7	23	2.3	236.5	24.5	20	1.7	256.7	24.9	20
2019-05-11	20:00:00	1.2	267.1	23.4	26	1.6	239.9	23.3	22	0.8	248.7	23.4	24
2019-05-11	21:00:00	4.3	271.3	21.4	33	5.7	238	21.2	29	3.2	249.1	21.1	31
2019-05-11	22:00:00	1.8	341.1	20.2	38	1.8	270.1	20.6	31	1.3	292.5	20.2	36
2019-05-11	23:00:00	3	65.9	17	58	5	36.2	17.3	50	4.2	0.7	16.9	54
2019-05-12	00:00:00	3.6	92.2	13.7	80	4	52.5	13.7	72	3	31	13.7	74
2019-05-12	01:00:00	1.4	163.2	13.8	74	1.2	125.6	13.7	69	0.8	127.4	14	68
2019-05-12	02:00:00	1.8	237.8	13.8	74	2.3	209.8	13.6	70	0.8	214.7	13.9	69
2019-05-12	03:00:00	1.5	351.9	13.4	77	2.7	299.2	13.5	71	1.8	288.8	13.5	72
2019-05-12	04:00:00	2.4	22.9	14.1	52	3.3	347.7	14.4	48	2.9	318.1	14.2	48
2019-05-12	05:00:00	3.1	14	12.7	27	3.6	348.2	12.8	25	3.3	312	12.6	25
2019-05-12	06:00:00	3.1	18.1	10.7	31	3.3	329.1	10.9	28	2.4	311.4	10.8	31
2019-05-12	07:00:00	4.5	8.7	8.3	45	4.3	318.6	8	44	4.7	293.7	8.2	44
2019-05-12	08:00:00	3	10.8	7.5	43	2.6	341.4	6.9	47	2.9	302.1	7.4	42
2019-05-12	09:00:00	3.5	17.2	7.6	38	3	334.5	7.6	36	3.6	310.4	7.5	36
2019-05-12	10:00:00	3.4	23	8	41	3.9	343.3	7.7	38	3.4	323.8	7.8	39
2019-05-12	11:00:00	3.5	6.9	8.4	43	4	339.8	8.2	39	3.6	312	8.3	41
2019-05-12	12:00:00	3.3	5.1	9.6	39	3.3	335.8	9.4	36	3.9	304.6	9.4	37
2019-05-12	13:00:00	4.1	4	10.7	35	3.7	317.8	10.6	32	4.7	301.4	10.6	33
2019-05-12	14:00:00	3.8	7.8	11.4	33	4	336	11.3	29	3.8	312.1	11.4	30
2019-05-12	15:00:00	3.5	12.6	11.8	31	3.5	335	11.6	28	3.6	310.9	11.6	29
2019-05-12	16:00:00	3.5	9.6	12.2	31	3.5	353.2	12	27	4	302.8	12	28
2019-05-12	17:00:00	3.3	10.8	12.6	30	3.5	348.5	12.2	27	3.5	305.4	12.4	27
2019-05-12	18:00:00	3.3	10.9	12.6	29	3.1	347.1	12.3	26	3.1	317.7	12.4	27
2019-05-12	19:00:00	3.1	4.8	12.4	29	3	357.3	12	27	2.8	313.1	12.3	27
2019-05-12	20:00:00	2.5	11.2	11.5	29	2.5	347.4	11.5	26	1.9	304.1	11.5	27
2019-05-12	21:00:00	1.2	20.3	10.6	32	1.5	357.1	10.7	28	1.1	340.3	10.6	29
2019-05-12	22:00:00	1.2	7.4	9.8	35	1.2	14.4	10.2	30	0.8	326.7	9.7	33
2019-05-12	23:00:00	1.1	6.8	8.8	40	0.5	286.1	9.1	41	0.6	294.8	9.1	35
2019-05-13	00:00:00	0.8	7.7	7.8	46	0.4	226.6	7.8	46	0.5	328.8	8.7	38
2019-05-13	01:00:00	1.2	11.9	6.4	52	0.4	248	6.6	50	0.8	328.3	7.5	43
2019-05-13	02:00:00	0.7	17.2	5.2	61	1	226.9	5.8	54	0.7	281.2	5.8	51
2019-05-13	03:00:00	0.8	23.9	4.6	65	0.4	224	5.4	57	0.4	242.4	5.8	51
2019-05-13	04:00:00	1	15	4.2	70	0.8	227.8	4.5	61	0.5	261.7	5.6	54
2019-05-13	05:00:00	1.1	18.3	3.3	77	0.3	219.2	4.1	62	0.5	264.3	4.5	63
2019-05-13	06:00:00	1	20.9	2.7	81	0.7	230.3	3.9	62	0.5	262	3.9	68
2019-05-13	07:00:00	0.7	8.1	3.7	78	0.4	190.5	5.3	60	0.2	75.4	6	63
2019-05-13	08:00:00	1.3	234.2	8.3	51	0.8	182	7.9	46	1	103.9	8.2	43
2019-05-13	09:00:00	2.8	220.1	9.7	39	2.5	191.2	9.3	36	1.4	144.1	10.3	34
2019-05-13	10:00:00	3.4	228.6	11.7	34	3	185.8	11.3	31	1.9	159.1	11.9	31
2019-05-13	11:00:00	2.8	219.5	13.3	31	2.6	178.3	12.8	29	1.3	172.5	13.8	28
2019-05-13	12:00:00	2.5	229.6	14.7	30	2.3	195.9	14.5	27	1.5	125	15.2	26
2019-05-13	13:00:00	3	237.7	16.8	27	1.9	189	16.8	24	1.5	130.7	17	24
2019-05-13	14:00:00	3.6	221.5	18.6	24	3.3	186.6	17.9	21	1.9	168.2	18.9	21
2019-05-13	15:00:00	3.8	231.7	19.7	24	3.4	196	19.3	21	1.8	162.7	20.1	21
2019-05-13	16:00:00	2.7	231.5	20.8	24	2.6	193.5	20.5	21	1.5	130.2	20.9	21
2019-05-13	17:00:00	1.7	217.8	22	23	1.5	173.4	21.7	20	1.4	99.3	21.6	21
2019-05-13	18:00:00	1.7	176.5	22.3	23	1.4	148.2	22	20	1.3	89.3	22	21
2019-05-13	19:00:00	1.6	205.5	21.7	25	1.8	158.7	21.3	22	1.3	107.8	21.4	22
2019-05-13	20:00:00	1.4	201.3	20.4	27	1.9	173	20.1	24	1.2	112	20.1	26
2019-05-13	21:00:00	0.8	199.2	18.9	31	1.1	148.8	19	26	0.8	109.3	19	28
2019-05-13	22:00:00	0.9	175.6	17.7	32	0.8	144.6	18.1	28	0.7	95.5	18	30
2019-05-13	23:00:00	0.4	192	16.8	33	0.4	97.9	17.3	29	0.5	58.1	17.1	31
2019-05-14	00:00:00	0.7	40.4	14.8	43	0.2	236.7	15.9	39	0.4	295.4	15.9	36
2019-05-14	01:00:00	0.6	13.2	12.7	50	0.5	334	13.6	48	0.7	290.4	13.7	43
2019-05-14	02:00:00	0.5	37.4	11.3	58	0.6	314.8	12.2	50	0.7	299.8	12.3	49
2019-05-14	03:00:00	0.9	11.9	10.2	66	0.7	345.3	11.5	56	0.6	318.4	11.5	53
2019-05-14	04:00:00	1	19.1	9.7	68	0.6	336.4	11.2	57	1	289.6	10.1	60
2019-05-14	05:00:00	0.8	3.9	8.8	73	0.5	25.9	10.8	57	0.7	341.7	9.9	59
2019-05-14	06:00:00	0.8	6.8	9.3	70	0.4	309.8	10.7	61	0.5	327.2	10.2	59
2019-05-14	07:00:00	0.7	0.3	9.5	69	0.3	298.1	10.7	64	0.5	328.4	10.6	60
2019-05-14	08:00:00	0.7	352.3	10.2	69	0.5	22.4	11.5	62	0.8	331.7	10.9	60
2019-05-14	09:00:00	0.6	267.1	12.3	66	0.6	180.2	13.4	55	0.4	109	12.9	56
2019-05-14	10:00:00	1.7	240	14.4	57	1.7	214.4	14.4	51	0.8	191.6	15	49
2019-05-14	11:00:00	1.3	228.9	15.7	53	1.4	221.7	15.4	49	0.6	196.3	16.3	46
2019-05-14	12:00:00	1.8	236.6	16.8	52	1.2	210.5	16.8	47	0.7	162.3	17.4	46
2019-05-14	13:00:00	1.6	228.9	18.1	49	1.4	193.7	17.8	45	0.8	146.1	18.5	44
2019-05-14	14:00:00	2.9	229.2	19.2	47	2.6	199.2	18.8	43	1.5	135	19.4	42
2019-05-14	15:00:00	2.2	225.1	21	40	—	—	—	—	1.5	108.5	21	36
2019-05-14	16:00:00	1.6	244.7	22.8	31	1.4	177.2	22	30	1	107.1	22.6	28
2019-05-14	17:00:00	2	207.8	23.8	23	1.9	182.7	23.1	23	1.1	129.9	23.7	23
2019-05-14	18:00:00	2.2	226.1	24.4	21	1.9	181.4	23.6	18	1.3	145.3	24.2	18
2019-05-14	19:00:00	2.7	229.7	23.6	22	1.7	174.6	23.4	17	0.9	137.7	23.7	18
2019-05-14	20:00:00	1.2	216.7	22.4	25	1.7	163.8	22.6	17	0.6	115.7	22.4	20
2019-05-14	21:00:00	0.6	189.9	20.6	27	1.2	164.9	21.4	19	0.6	114.3	21	22
2019-05-14	22:00:00	0.5	150.3	18.9	34	0.6	180.4	19.5	25	0.6	104.7	19.7	27
2019-05-14	23:00:00	0.3	199	17.5	40	0.7	221	17.7	32	0.2	233.2	18.2	33
2019-05-15	00:00:00	0.3	242.7	16.1	48	0.9	202.8	16.5	37	0.2	149.1	17	35
2019-05-15	01:00:00	0.5	230.2	15.2	52	1.4	194.4	16.1	38	0.3	218.8	16.1	40
2019-05-15	02:00:00	0.5	351.6	14.6	56	1.3	208.5	16	37	0	182.7	15.9	41
2019-05-15	03:00:00	0.6	8.9	13.8	57	0.5	214.4	15.6	40	0.2	119.8	15.8	42
2019-05-15	04:00:00	0.2	23.6	13.2	58	0.6	204.6	14.6	47	0.3	89.5	14.9	48
2019-05-15	05:00:00	1.3	5.7	12.1	65	0.8	317.8	13.7	51	0.7	294.2	13.7	53
2019-05-15	06:00:00	0.7	23.4	11.8	64	0.6	286.7	13.8	51	0.6	343.7	13.3	53
2019-05-15	07:00:00	0.4	348.7	12.4	63	0.5	90.6	14.5	53	0.5	310.2	13.6	55
2019-05-15	08:00:00	1	274.4	13.3	64	1.4	216.9	14.1	57	1.1	261.4	14.4	56
2019-05-15	09:00:00	1	338.1	15.2	62	1	5.9	16.2	55	0.7	331.2	15.9	55
2019-05-15	10:00:00	0.9	240.7	18.5	53	1	232.9	18.5	48	0.7	75.5	18.8	48
2019-05-15	11:00:00	1.5	316.4	20.6	42	1.3	267.5	20.4	41	1.8	330.5	20.6	37
2019-05-15	12:00:00	3.3	358.6	22.4	28	3.5	308.6	22.2	25	3.2	297.3	22.5	25
2019-05-15	13:00:00	4.1	354.3	23.3	21	4.6	303	23	19	4.8	292.3	23.5	18
2019-05-15	14:00:00	4.4	358.1	23.5	16	4.7	311.9	23.1	14	4.8	291.9	23.6	14
2019-05-15	15:00:00	4.4	349	23.7	17	4.7	304.9	23.3	14	5	289.7	23.8	14
2019-05-15	16:00:00	3.5	350.9	23.9	17	3.3	320	23.7	14	4.1	297.8	23.9	15
2019-05-15	17:00:00	3.1	349.9	23.8	19	2.6	311	23.6	16	4	287.8	23.8	16
2019-05-15	18:00:00	2.3	332.2	24.1	19	2.1	293.2	23.7	16	2.3	273.8	24.1	16
2019-05-15	19:00:00	2	277.3	24.1	20	1.6	247.9	24	17	1.9	255	24.2	17
2019-05-15	20:00:00	1.2	257.3	22.9	23	1.6	247.9	22.6	20	1.3	242.7	23	20
2019-05-15	21:00:00	1	307.6	21.4	26	1.3	246.1	21.1	24	0.9	264.3	21.2	24
2019-05-15	22:00:00	0.8	229.8	19.4	33	0.6	45.9	19.5	28	0.6	280	19.6	28
2019-05-15	23:00:00	0.5	12.3	18.1	38	0.5	286.5	18.8	32	0.4	240	18.7	32
2019-05-16	00:00:00	0.5	270	16.7	44	0.7	214.2	16.8	38	0.3	148.3	17.8	36
2019-05-16	01:00:00	0.4	258.8	15.8	49	0.9	224.2	15.9	40	0.2	114.8	16.8	38
2019-05-16	02:00:00	0.7	278.1	15	52	0.7	222.3	14.9	43	0.5	160.4	15.8	40
2019-05-16	03:00:00	0.6	14.5	13.7	56	0.8	231.8	14.1	44	0.4	152.3	15.1	41
2019-05-16	04:00:00	0.7	13	12.8	60	0.4	16.9	13.6	46	0.4	89.7	14.4	46
2019-05-16	05:00:00	0.7	15.1	11.6	65	0.4	86.2	13.5	49	0.7	293.1	12.8	54
2019-05-16	06:00:00	0.8	19.3	11.2	66	0.4	231.2	12.6	59	0.2	57.8	12.7	54
2019-05-16	07:00:00	0.6	350.6	11.6	66	0.4	207.2	12.4	58	0.5	149.8	13.1	54
2019-05-16	08:00:00	1	229.6	14.5	57	0.8	214.3	14.4	50	0.4	140.4	15.2	49
2019-05-16	09:00:00	1.1	225	17.2	42	0.8	94.9	17.2	41	0.7	63.6	17.5	42
2019-05-16	10:00:00	1.7	228	19.6	37	1.6	199.7	19	36	1.1	120.6	19.4	36
2019-05-16	11:00:00	1.8	220.5	21.9	33	1.5	187.3	21.5	30	1.2	134.8	22.1	31
2019-05-16	12:00:00	2.7	227.6	23.8	28	2.6	182.8	23.5	25	1.5	142	24.2	25
2019-05-16	13:00:00	2.5	221.7	25.3	26	2.3	190.2	24.8	24	1.6	121.8	25.3	24
2019-05-16	14:00:00	3.4	226.4	26	26	3	197.7	25.7	23	1.4	119.4	26.3	23
2019-05-16	15:00:00	3.5	226.4	26.8	25	3.2	185.5	26.2	22	1.8	139.4	27	22
2019-05-16	16:00:00	3.5	223.1	27.2	24	3.4	194.5	26.6	21	1.7	148.9	27.4	21
2019-05-16	17:00:00	4.2	225.5	27.2	24	3.2	192.9	26.9	21	1.8	137.8	27.5	21
2019-05-16	18:00:00	3.9	223.4	26.9	26	3.1	186	26.4	23	1.8	134.4	26.9	23
2019-05-16	19:00:00	3.9	219	26	30	3.1	191.2	25.6	27	1.8	146.9	25.9	27
2019-05-16	20:00:00	3.6	223.1	25	33	3.2	203.4	24.7	30	1.4	173.4	24.8	30
2019-05-16	21:00:00	5.1	240.9	22.4	45	4.9	223.6	21.8	44	1.9	237.8	22.2	43
2019-05-16	22:00:00	2.8	239.2	20.8	51	3.1	220.4	20.6	47	1.6	242.1	20.5	48
2019-05-16	23:00:00	2	271.8	19.7	53	2.2	215.7	19.5	49	0.9	249.1	19.5	50
2019-05-17	00:00:00	2.1	245.5	18.8	55	1.8	210.3	18.7	50	0.6	225.3	18.5	52
2019-05-17	01:00:00	1.9	242.6	18.2	57	2.4	209.5	17.9	54	0.5	239.7	17.9	54
2019-05-17	02:00:00	1.2	239.2	17.3	60	1.7	208	17	57	0.5	185.1	17.2	58
2019-05-17	03:00:00	1.1	225.2	16.8	63	0.8	178.7	16.6	58	0.4	134.6	16.8	59
2019-05-17	04:00:00	0.4	141.4	16.1	64	0.4	136.6	15.7	61	0.5	76.6	16.4	60
2019-05-17	05:00:00	0.7	223.9	14.8	69	1	196.5	14.7	67	0.4	235.3	15.2	65
2019-05-17	06:00:00	1.3	211.5	14.3	71	0.9	196.5	14	68	0.7	103.6	14.3	67
2019-05-17	07:00:00	0.8	213.8	14.5	71	1.2	165.6	14.2	68	0.8	117.8	14.5	68
2019-05-17	08:00:00	2.1	230.8	15.7	70	2	189.3	15.3	67	1.2	106.6	15.8	65
2019-05-17	09:00:00	2.7	227.5	17.2	66	—	—	—	—	1.4	139.7	17.5	60
2019-05-17	10:00:00	3.2	225.4	19	59	1.9	193	19	56	1.3	157.4	19.6	53
2019-05-17	11:00:00	3	225.5	21.1	52	3	202.7	20.7	49	1.4	166	21.6	47
2019-05-17	12:00:00	3.7	220.9	22.7	48	3.1	184.3	22.4	45	1.8	156.2	23.2	44
2019-05-17	13:00:00	4.4	226	24.7	41	3.8	179.5	23.9	38	2.2	138.6	24.9	38
2019-05-17	14:00:00	4.4	230.8	25.8	37	4.1	191.4	25.1	35	1.7	163.3	26.3	33
2019-05-17	15:00:00	4.5	228	26.5	35	3.9	199.4	26.1	32	2	144.6	26.9	31
2019-05-17	16:00:00	3.8	226.1	27.5	32	3.6	191.6	26.8	29	1.8	160.4	27.7	28
2019-05-17	17:00:00	4.3	228.7	27.8	31	3.7	196.4	27.4	27	1.8	163	28.1	27
2019-05-17	18:00:00	4	222.6	28	30	4.2	199.1	27.3	27	1.7	170.4	28.1	26
2019-05-17	19:00:00	4.2	222.8	27.4	32	3.5	193.9	27	28	1.9	161.6	27.4	28
2019-05-17	20:00:00	2.6	219.6	26.5	34	—	—	—	—	1.4	140.9	26.3	30
2019-05-17	21:00:00	1.7	213.2	25	37	2	167.5	24.9	33	1.1	110	24.8	34
2019-05-17	22:00:00	1.1	209.9	24.1	38	2	164.5	24.2	34	0.9	107.6	23.9	36
2019-05-17	23:00:00	2.2	219.9	23.7	39	1.9	202.4	23.4	36	1	153.7	23.5	36
2019-05-18	00:00:00	3.7	227.5	23.5	40	3.2	201.6	22.6	38	1.3	166	23.1	37
2019-05-18	01:00:00	2.3	220.3	22.5	42	3.1	193.6	22.2	40	1	163.6	22.5	39
2019-05-18	02:00:00	1.6	218.6	22	45	2.4	201.7	21.7	42	0.9	165.6	21.9	42
2019-05-18	03:00:00	1.4	214.8	21.5	48	2.2	204.5	21.1	45	0.6	174.5	21.5	44
2019-05-18	04:00:00	2.1	220.6	20.7	50	2.1	192.3	20.5	46	1.1	108.5	20.6	47
2019-05-18	05:00:00	2.5	219.5	20.2	52	1.9	205.2	20	48	1	112.3	20.3	48
2019-05-18	06:00:00	2.8	219	19.9	54	2	189.6	19.7	50	1.3	140	19.9	50
2019-05-18	07:00:00	2.6	214.8	19.7	54	2.6	200.6	19.4	51	1.3	149.8	20	49
2019-05-18	08:00:00	2.8	216.7	20.1	53	2.1	207.6	19.8	50	1.1	139.7	20.2	49
2019-05-18	09:00:00	2.4	229.3	21	52	2.6	197.7	20.6	49	1	177.7	21.4	47
2019-05-18	10:00:00	3.9	227.1	22	51	3.3	200.5	21.4	50	1.6	161.8	22.4	46
2019-05-18	11:00:00	3.2	227.7	21.8	53	3.1	199.6	21.5	50	1	183	22.2	49
2019-05-18	12:00:00	2.7	222.2	23.4	51	3.4	196.1	23	50	1.4	191.2	24.2	47
2019-05-18	13:00:00	3.8	228.1	23.8	55	3.8	201.7	23.4	51	1.6	184.9	24.4	50
2019-05-18	14:00:00	3.1	218.1	24.7	51	2.6	207.2	24	48	1.6	174.1	25	47
2019-05-18	15:00:00	2.3	235.5	26	47	2.9	223.1	25.7	43	1.4	169.2	26.5	42
2019-05-18	16:00:00	2.5	243.3	25.7	49	1.8	195.5	25.1	47	1.1	196.8	25.9	45
2019-05-18	17:00:00	2	28.2	22	71	1.9	338.9	23.5	55	1.9	313.9	22.2	65
2019-05-18	18:00:00	0.8	29.7	22.5	72	2.2	265	24.3	50	1	292.8	23.3	62
2019-05-18	19:00:00	3.8	1.9	21.1	66	3.6	309.9	22	53	3.7	296	21.2	60
2019-05-18	20:00:00	3	19.8	14.3	85	4.7	5.6	12.5	83	3.3	321.7	14	79
2019-05-18	21:00:00	2.1	37.3	14	80	4.2	18.1	13.8	74	2.7	345	14	73
2019-05-18	22:00:00	1.8	16.2	14.1	75	2.7	13.8	14.5	65	1.6	318.5	14.2	67
2019-05-18	23:00:00	2.9	19	13.8	73	3	350.8	14	65	2.4	316.2	13.8	68
2019-05-19	00:00:00	1.6	42.4	13.2	73	2.4	20.5	13.4	67	1.4	341.4	13.2	69
2019-05-19	01:00:00	1.8	30.2	13.1	74	2.4	17.1	13.1	68	2	345.2	12.9	70
2019-05-19	02:00:00	2.1	16.6	12.7	69	3.3	355.5	12.8	62	2.3	313.2	12.6	65
2019-05-19	03:00:00	3.2	13.3	12.2	61	3.9	342.7	12.4	54	2.8	306.2	12.2	57
2019-05-19	04:00:00	4.2	18.7	11.9	50	5.2	342.9	12	46	3.8	305.3	11.9	45
2019-05-19	05:00:00	3.1	15.5	10.9	39	4.5	342	11	36	3.2	305.9	10.9	36
2019-05-19	06:00:00	2.3	9.5	10.1	37	2.5	330	10.1	32	2.3	297.1	10.1	34
2019-05-19	07:00:00	3.4	11.9	10.1	36	4	331.7	10.2	30	3.9	308.3	10.1	32
2019-05-19	08:00:00	3.3	348.4	10.6	35	4.4	302.5	10.6	31	3.9	283.1	10.6	33
2019-05-19	09:00:00	4.8	359.1	11.6	30	4.5	315.4	11.4	27	5.2	296.4	11.5	27
2019-05-19	10:00:00	5.3	10.7	12.2	25	5.4	339.5	12.1	21	5.4	308.8	12.1	22
2019-05-19	11:00:00	4	7.8	12.1	33	5.5	343	11.7	29	5	304.8	11.7	31
2019-05-19	12:00:00	4.1	12	12.6	36	4.5	349.7	12.3	32	4.4	313.4	12.3	33
2019-05-19	13:00:00	3.9	21.8	13.4	34	4.4	346.7	13.1	30	4.4	314.3	13.1	32
2019-05-19	14:00:00	3.9	21.8	14.1	30	4.1	350	13.9	28	4.2	321.2	14	28
2019-05-19	15:00:00	3.2	30.8	15.3	23	4.5	351.4	14.7	20	4.3	324.1	14.7	20
2019-05-19	16:00:00	3.4	31.6	15.5	19	4.1	354.6	15	16	3.8	328.9	15.1	17
2019-05-19	17:00:00	3.3	42	15.5	18	3.6	13.4	15.2	15	3.3	339.6	15.1	16
2019-05-19	18:00:00	2.6	43.8	15.5	17	3.7	23.4	14.9	14	3	356.3	15.1	15
2019-05-19	19:00:00	2.6	43.5	15	17	3.6	24	14.6	14	2.8	348.2	14.6	15
2019-05-19	20:00:00	1.6	33.2	13.9	18	2.8	23.2	13.8	14	1.8	354.8	13.6	16
2019-05-19	21:00:00	1.3	15	12.6	20	2	14.4	12.8	16	1.2	340.1	12.3	18
2019-05-19	22:00:00	1	9.5	11.4	24	1.4	4.8	11.9	18	1.6	336.4	11.3	21
2019-05-19	23:00:00	1.8	2.3	10	30	1.4	2.1	10.6	22	1.2	320.4	9.8	26
2019-05-20	00:00:00	2	359.9	8.4	38	0.8	336.9	9.2	26	1.5	327.8	8.5	30
2019-05-20	01:00:00	1.4	353.2	7.3	41	1	342.6	8.2	28	1	321.1	7.4	32
2019-05-20	02:00:00	1.3	5.9	6.3	43	0.6	342.1	7.5	34	0.8	340.5	6.8	34
2019-05-20	03:00:00	1.3	6.8	5.6	47	0.4	330.7	6.7	41	0.8	330.7	6	38
2019-05-20	04:00:00	1.1	2.8	4.7	55	0.5	325.5	5.9	46	0.8	318.9	5.1	44
2019-05-20	05:00:00	0.8	12	3.7	60	0.6	288.7	5.2	45	0.8	273.5	4.1	49
2019-05-20	06:00:00	0.9	18.3	3.2	61	0.7	260.8	4.3	58	0.9	294.1	4	49
2019-05-20	07:00:00	0.9	33	4.4	52	0.7	312.7	5.2	50	1	293.3	4.9	47
2019-05-20	08:00:00	0.7	65.4	7.4	41	1	345.9	8.1	36	0.7	331.4	7.4	39
2019-05-20	09:00:00	0.8	17.7	9.8	36	0.7	100.3	10.9	31	0.7	332.3	9.8	35
2019-05-20	10:00:00	1.1	35.1	12.4	29	0.9	58.9	13.8	26	0.8	321.8	13.2	26
2019-05-20	11:00:00	1.5	240.4	15	23	—	—	—	—	1.2	289.1	15	19
2019-05-20	12:00:00	2.3	319.2	15.9	20	2	266.1	16	17	2	278.8	16.1	17
2019-05-20	13:00:00	2.4	303	16.7	19	2.7	283.5	16.8	15	2.1	287.9	17	16
2019-05-20	14:00:00	2.4	326.9	17.8	18	2	297.1	17.9	15	2.4	275.3	18.1	15
2019-05-20	15:00:00	2.5	290.8	19.1	17	2.8	278.4	18.9	14	2.3	287.9	19	14
2019-05-20	16:00:00	2.4	327.6	19.8	16	2.2	272.6	19.8	13	2.1	273	20	13
2019-05-20	17:00:00	2.1	313.8	20.6	15	2.2	290.7	20.4	12	2.7	276.1	20.5	13
2019-05-20	18:00:00	2.2	333.9	21.1	15	2.3	295.1	20.6	13	2.2	291.2	20.9	13
2019-05-20	19:00:00	2	346.8	20.8	15	1.9	293.7	20.6	13	1.7	302.4	20.7	13
2019-05-20	20:00:00	1	320.1	19.8	16	1.1	294.1	19.6	14	1.2	262.5	19.8	14
2019-05-20	21:00:00	0.7	339.5	18.8	21	0.2	246.1	18.2	24	0.7	242.2	18.9	17
2019-05-20	22:00:00	0.4	222.1	16.8	31	0.3	217.8	16.4	30	0.2	157.6	17.2	22
2019-05-20	23:00:00	0.9	13.6	14.6	40	0.3	277.9	14.7	35	0.1	7	15.7	30
2019-05-21	00:00:00	0.7	17.5	12.8	42	0.4	280.3	13.2	38	0.4	251.7	14.6	36
2019-05-21	01:00:00	1.1	10.7	11	54	0.6	319.6	12.1	45	0.9	306.7	12	46
2019-05-21	02:00:00	0.8	8.5	9.9	61	0.6	326.8	11.4	48	0.7	338.6	10.9	48
2019-05-21	03:00:00	0.6	21	9.1	65	0.7	334.9	10.8	50	0.9	289.7	10.1	52
2019-05-21	04:00:00	0.8	8	8	68	0.8	335.4	9.9	50	0.7	308.9	9	52
2019-05-21	05:00:00	0.7	11.8	7.3	68	0.5	307	9	54	0.9	287.3	8	56
2019-05-21	06:00:00	0.5	20.3	6.4	70	0.6	324.2	8.1	58	0.7	282	7.3	60
2019-05-21	07:00:00	0.5	44.8	7.8	67	0.4	303.3	9.2	56	0.7	293	7.8	62
2019-05-21	08:00:00	0.8	42.7	10.9	55	0.5	13.8	12.7	46	0.6	338.3	11.1	49
2019-05-21	09:00:00	0.5	315.4	15	39	0.6	293.6	15.8	35	0.5	45.6	15.4	36
2019-05-21	10:00:00	0.7	210.1	19.5	31	0.6	144.3	19.8	27	0.8	72.3	18.8	31
2019-05-21	11:00:00	1.1	212.3	21.8	24	0.8	170.7	22	20	0.9	51.2	21.8	22
2019-05-21	12:00:00	1.6	5	23.4	18	1.8	318.2	23.3	15	2.3	297.7	23.3	15
2019-05-21	13:00:00	2.6	347.2	24.3	16	2.3	326.6	24	13	2.4	308.7	24.2	14
2019-05-21	14:00:00	2.4	0	25	16	2.5	325.6	25	12	2.4	318	25.2	13
2019-05-21	15:00:00	2.4	1.7	26	15	2.8	321.8	25.7	12	2.4	294.2	26	12
2019-05-21	16:00:00	2.9	353	26.5	14	2.5	334.1	26.3	11	3.1	295.9	26.4	12
2019-05-21	17:00:00	3.2	4.8	27	13	3	319.6	26.7	11	2.8	308.8	27.1	11
2019-05-21	18:00:00	3.1	356.5	27.2	13	2.9	345.5	26.8	10	3.3	300.5	27	11
2019-05-21	19:00:00	2.5	2.7	27	13	2	325.3	26.7	10	2.4	300.7	26.9	11
2019-05-21	20:00:00	1.8	8.6	25.6	14	1.7	318.3	25.4	12	1.7	301.3	25.8	11
2019-05-21	21:00:00	0.9	359.7	23.5	17	1.8	298.2	23.2	15	0.7	291.5	23.6	15
2019-05-21	22:00:00	0.7	33.4	21.1	23	1.9	296.6	21.4	18	1.4	303.4	22	18
2019-05-21	23:00:00	1	39.8	19.2	25	1.4	298.7	20.2	20	0.8	337.3	20.5	20
2019-05-22	00:00:00	1.1	11.8	18	29	0.9	36.9	18.9	22	1	349.1	18.4	24
2019-05-22	01:00:00	0.9	25.3	16.1	34	0.9	323.4	17.3	26	1.2	310.6	17	27
2019-05-22	02:00:00	0.8	15.4	14.3	38	0.4	28.3	16.2	29	0.5	340	15.4	30
2019-05-22	03:00:00	1	19.6	12.8	41	0.4	328	15.1	32	0.7	317.4	14.2	33
2019-05-22	04:00:00	1	14.2	11.1	46	1	314	13.5	36	1	315.6	12.7	36
2019-05-22	05:00:00	0.6	17.6	10.2	50	0.6	297.5	12.2	41	0.7	290.6	11.1	42
2019-05-22	06:00:00	0.7	15.2	9.9	53	0.5	304.6	11.3	42	0.3	52.3	11.1	44
2019-05-22	07:00:00	0.7	13.6	11.3	51	0.2	232.5	12.9	42	0.5	63.5	12.6	45
2019-05-22	08:00:00	0.5	298.1	15.2	39	0.6	249.6	15.9	32	0.6	69.3	15.6	38
2019-05-22	09:00:00	0.6	205.2	18.8	33	1.6	223	17.7	29	0.7	77.7	18.1	33
2019-05-22	10:00:00	0.9	187.7	21.6	30	1.5	219.6	20.8	26	0.6	88.5	21.8	27
2019-05-22	11:00:00	1.8	266	24.6	23	2.1	235.2	24.2	20	1.4	283.9	25.1	20
2019-05-22	12:00:00	2.5	304	26.5	16	2.5	275	26.4	12	2	277.8	27	13
2019-05-22	13:00:00	2	282.5	27.7	13	2.5	233.9	27.4	10	1.6	265.3	27.8	11
2019-05-22	14:00:00	2.4	274.9	28.4	13	2.4	228.1	28	9	1.8	255.5	28.8	10
2019-05-22	15:00:00	2	265.7	29.4	13	2.1	238.1	28.8	9	1.8	260	29.5	10
2019-05-22	16:00:00	1.9	306.8	29.9	12	2.5	236.5	29.3	9	1.9	276.8	29.8	10
2019-05-22	17:00:00	2.1	302.1	30	11	2.3	250.2	29.8	8	1.8	283.9	30.1	9
2019-05-22	18:00:00	1.8	318.6	30.4	11	1.9	269.5	29.8	8	1.8	272.8	30.4	9
2019-05-22	19:00:00	1.6	277	30	11	2	240.4	29.6	8	1.4	270	30	10
2019-05-22	20:00:00	1.6	256.7	28.6	13	2.3	221.5	28.3	10	0.9	253.1	28.7	11
2019-05-22	21:00:00	1.1	235.8	26.6	16	2.3	217.8	26.5	13	0.7	228.1	26.3	14
2019-05-22	22:00:00	0.8	194.7	23.8	23	1.2	209.6	24.4	16	0.5	213.4	24.4	16
2019-05-22	23:00:00	0.5	186.6	21.6	28	0.9	216.7	22.2	20	0.6	216.9	23.1	18
2019-05-23	00:00:00	0.5	212.5	20	32	0.4	225.4	20.5	25	0.5	124.5	21.5	21
2019-05-23	01:00:00	0.5	260.8	18.5	40	0.6	202.5	19.4	27	0.5	135.2	20.2	27
2019-05-23	02:00:00	0.4	344.8	16.8	49	0.8	224.8	18.2	28	0.3	126.9	19.2	28
2019-05-23	03:00:00	0.8	17.8	15.3	54	0.4	271.4	17.3	27	0.4	99.4	18.1	35
2019-05-23	04:00:00	0.9	17.5	14.2	58	0.4	215.4	17	29	0.5	338.7	16.5	44
2019-05-23	05:00:00	0.7	12	12.6	60	0.5	356.3	15.6	36	0.3	324.5	15	46
2019-05-23	06:00:00	1	25.7	12	60	0.5	216.4	14.6	44	0.4	255.9	14.1	46
2019-05-23	07:00:00	0.8	18.8	12.8	59	0.2	295.8	16.2	40	0.4	278	14.6	48
2019-05-23	08:00:00	0.4	12	17	47	0.2	350.7	19.7	37	0.4	327.2	18	42
2019-05-23	09:00:00	0.7	252.8	22.2	35	0.7	199.7	21.9	27	0.9	97.9	21.4	28
2019-05-23	10:00:00	1.4	222.2	24.2	25	1.1	183	23.6	21	1	102.4	23.9	22
2019-05-23	11:00:00	2.4	227.3	26.3	22	2.2	206.2	25.8	20	1.2	128.1	26.6	20
2019-05-23	12:00:00	3.2	229.3	28.4	18	3	197.4	28.2	15	1.4	153.6	28.9	15
2019-05-23	13:00:00	4.4	227.7	29.5	15	4.5	200	29.1	12	2.2	157.7	29.7	12
2019-05-23	14:00:00	5.6	231.2	30	15	5	205.2	29.5	11	2	164.1	30.6	12
2019-05-23	15:00:00	4.6	232.6	30.1	13	4.8	204.4	29.5	10	2.2	180.5	30.5	10
2019-05-23	16:00:00	4.5	226.6	30.4	15	4.5	206.2	29.9	11	1.9	180.6	30.6	12
2019-05-23	17:00:00	4.3	223.6	30.2	13	4.5	205.8	29.5	10	1.9	177.3	30.1	10
2019-05-23	18:00:00	4.1	225.2	29.6	16	3.5	200.3	29.1	13	1.6	160.5	29.7	13
2019-05-23	19:00:00	2.9	215.7	29	18	1.9	178.2	28.4	16	1.2	130.6	28.7	16
2019-05-23	20:00:00	2.2	216.1	28.3	21	2.1	162.7	27.8	18	0.8	114.9	27.9	19
2019-05-23	21:00:00	0.6	194.8	26.7	23	1.5	170	26.9	19	0.8	105.6	26.7	20
2019-05-23	22:00:00	0.7	187.9	25.3	24	1.4	163.6	25.8	19	0.9	102.5	25.5	21
2019-05-23	23:00:00	0.8	182.4	24.5	22	1.5	166.2	25	18	1	102.8	24.8	20
2019-05-24	00:00:00	1.5	211.4	23.7	22	1.9	198.1	24	18	0.9	120.9	23.9	19
2019-05-24	01:00:00	0.9	204.2	22.7	23	1.4	195	22.5	21	0.6	128.8	22.8	21
2019-05-24	02:00:00	0.8	235.6	21.7	27	1.6	186.3	21.9	23	0.5	165.4	21.9	24
2019-05-24	03:00:00	0.8	227.5	21.1	30	1.1	218	20.7	25	0.2	213.4	21	27
2019-05-24	04:00:00	1.2	227.6	20.5	32	1	179.7	20.6	27	0.2	131.6	20.7	27
2019-05-24	05:00:00	0.5	221.4	20.1	34	0.8	173.8	20.3	28	0.1	173.4	20.6	28
2019-05-24	06:00:00	0.8	231.6	20.3	33	0.7	189.2	20.3	28	0.4	175	20.7	27
2019-05-24	07:00:00	0.4	201.6	21.3	34	0.4	199.1	20.6	30	0.4	124.1	21.2	28
2019-05-24	08:00:00	1.9	220.5	22.9	30	1.1	169.3	22.2	28	1	101.3	22.5	27
2019-05-24	09:00:00	2.6	222.3	23.8	30	2.4	194.8	23.1	27	1.2	135.8	24.1	27
2019-05-24	10:00:00	2.5	219.8	25.2	31	2.4	203.2	24.4	28	1.4	120.5	25.4	27
2019-05-24	11:00:00	2.4	223.7	26.8	31	2.3	188.7	26.2	28	1.5	110	26.9	28
2019-05-24	12:00:00	2.8	241.1	27.8	31	2.4	169.2	27.4	27	1.7	146	28.1	28
2019-05-24	13:00:00	2.5	226.5	28.9	26	2.7	191.4	28.3	23	2	103.9	28.8	23
2019-05-24	14:00:00	2.5	243.4	29.5	26	2.6	192.9	28.8	23	1.6	119	29.6	23
2019-05-24	15:00:00	2.5	214	30.2	25	2.4	192.3	29.3	22	1.4	160.1	30.4	22
2019-05-24	16:00:00	2.3	253.1	30.2	24	1.4	141	30.4	20	1.5	95.2	30.3	21
2019-05-24	17:00:00	1.4	280.5	30.9	23	1.2	162.5	30.9	20	1.4	79.5	30.5	21
2019-05-24	18:00:00	1.5	247.1	31	23	1.3	206.2	30.3	20	1	96.4	30.8	21
2019-05-24	19:00:00	1.8	240.8	30.3	24	1.1	217.2	30	21	0.7	213.3	30.6	21
2019-05-24	20:00:00	1.5	227.8	29.9	25	2.1	174.1	29.4	23	1	119.4	29.8	23
2019-05-24	21:00:00	1.1	138.8	28.7	28	1	133.9	28.3	25	0.8	93.3	28.4	26
2019-05-24	22:00:00	1.1	168.1	26.8	32	1.1	150.9	26.6	29	0.9	90.4	26.7	29
2019-05-24	23:00:00	1.1	209.3	25.6	35	1.8	206.9	25.4	33	0.7	183.7	25.6	32
2019-05-25	00:00:00	1.3	219.3	24.7	40	2	197.4	24.3	38	0.6	159.8	24.6	38
2019-05-25	01:00:00	0.8	213.1	23.6	43	1.3	192.9	23.3	40	0.3	134.8	23.6	40
2019-05-25	02:00:00	0.6	356.8	22	49	0.5	264.6	21.6	46	0.5	135.6	22.6	43
2019-05-25	03:00:00	0.8	14.6	19.9	54	0.4	259	19.9	51	0.3	164.7	21.5	47
2019-05-25	04:00:00	0.8	19.8	18.5	58	0.2	240.2	18.9	56	0.4	9.3	20.3	51
2019-05-25	05:00:00	0.8	5.5	17.7	63	0.5	192.9	18.5	57	0.2	275	19.1	54
2019-05-25	06:00:00	0.4	11.8	17	66	0.8	190.1	17.7	59	0.4	130.1	18.8	57
2019-05-25	07:00:00	1	218.2	19.3	58	1.1	157.3	19.4	53	1.1	104.9	19.4	54
2019-05-25	08:00:00	2.4	223.1	20.7	55	1.5	191.2	20.4	52	1.3	101.4	20.9	51
2019-05-25	09:00:00	2.5	226	22.3	53	2	208.6	21.9	50	1.2	127.6	22.6	48
2019-05-25	10:00:00	1.7	226.8	24.3	49	1.8	220.6	23.7	46	1	138.4	24.6	44
2019-05-25	11:00:00	1.3	235.9	26.6	43	1.4	227.3	25.9	40	0.9	142.9	26.5	39
2019-05-25	12:00:00	1.7	253.8	28.3	38	1.2	185.5	28	34	1.1	116.7	28.3	34
2019-05-25	13:00:00	1.9	239.7	30.2	34	—	—	—	—	1.1	119.9	30.1	30
2019-05-25	14:00:00	2.2	268.9	30.7	31	1.9	221.7	30.6	27	1.2	126.9	31	26
2019-05-25	15:00:00	2.1	262.8	31.8	26	1.5	268.2	31.4	22	1.1	165.2	32.1	22
2019-05-25	16:00:00	1.7	267.2	31.8	23	1.2	274.6	31.9	19	1.2	125.4	32	21
2019-05-25	17:00:00	1.3	262.2	31.9	22	1.2	195.2	31.8	19	0.8	253.5	32	20
2019-05-25	18:00:00	1.7	242.7	31.7	22	1.3	182.6	31.3	18	0.7	259.6	31.9	20
2019-05-25	19:00:00	2	326.9	30.5	23	2.1	355.7	30.4	18	1.8	302.2	30.5	20
2019-05-25	20:00:00	2.4	13.3	28	25	3	349.3	27.8	21	2.3	302.5	27.9	22
2019-05-25	21:00:00	2.6	30	26.6	26	3.5	6.9	26.5	22	2.6	332.9	26.4	24
2019-05-25	22:00:00	2.8	42.4	24.1	28	4.6	24.6	24	25	3.3	347.7	23.9	26
2019-05-25	23:00:00	2.1	34.2	22.3	31	5	30.7	22.2	28	2.7	345.9	22.1	29
2019-05-26	00:00:00	2.3	22.5	21.2	33	4	25.7	21.3	29	2.1	337.2	21.2	30
2019-05-26	01:00:00	2.5	26.5	21	33	3.7	18.2	21	29	2.6	332.1	20.8	30
2019-05-26	02:00:00	2.4	27	20.3	35	4.3	23.5	20.3	31	2.3	337.5	20.2	32
2019-05-26	03:00:00	2	21.6	19.6	36	3.4	24.1	19.6	33	2	336.4	19.3	34
2019-05-26	04:00:00	2.2	11.8	18.7	37	2.5	19.5	19	33	1.6	307.8	18.5	35
2019-05-26	05:00:00	1.5	13	17.4	41	1.6	13.8	18.2	35	1.2	326.1	17.4	38
2019-05-26	06:00:00	1.1	16.1	16.5	45	0.8	358.2	17.3	39	1	331.7	16.5	42
2019-05-26	07:00:00	1.4	12.3	16.2	50	1.5	343.2	16.7	44	1.1	328.2	16	47
2019-05-26	08:00:00	2	19.8	17.9	41	3.3	347.6	18.4	32	2.2	317.4	17.9	36
2019-05-26	09:00:00	3.8	18.8	19.7	26	4.4	340.5	19.5	22	4.5	307.5	19.5	23
2019-05-26	10:00:00	4.5	10.4	20.2	19	4.4	320.5	20	17	4.8	308.7	20.1	17
2019-05-26	11:00:00	3.9	10.1	20.5	18	5.3	304.9	20.5	13	4.9	303	20.3	15
2019-05-26	12:00:00	4.6	12.4	19.2	28	5.6	344	19	25	5.3	307.2	19	26
2019-05-26	13:00:00	4.8	6	18.8	32	5.6	335.3	18.4	29	5.2	308.5	18.6	30
2019-05-26	14:00:00	4.5	11.9	18.3	38	4.6	339.7	18	34	5.1	304	18	35
2019-05-26	15:00:00	5	7.6	17.9	40	5.1	335.1	17.7	37	4.8	312.4	18	37
2019-05-26	16:00:00	4.6	13.7	19	37	4.9	341.3	18.6	34	4.7	311.4	18.8	34
2019-05-26	17:00:00	4.7	12.5	19.6	35	4.4	337.3	19.2	32	4.8	318.7	19.4	32
2019-05-26	18:00:00	4	19.9	19.2	36	5.3	350.3	18.7	33	4.4	330	18.9	33
2019-05-26	19:00:00	4.1	15.2	18.2	39	4.1	345.3	17.9	35	4	324.7	18	36
2019-05-26	20:00:00	3.1	24.2	17.5	42	4.1	0.3	17.3	39	3.4	319.2	17.4	40
2019-05-26	21:00:00	2.3	27	16.8	44	3.3	6.9	16.6	41	2.4	340.8	16.5	41
2019-05-26	22:00:00	1.9	46.7	16.2	44	3.6	25.3	16.1	42	2.4	353.6	16	43
2019-05-26	23:00:00	2.1	56.9	15.3	47	3.5	35.3	15.3	44	2.7	353.8	15.2	45
2019-05-27	00:00:00	1.8	57.1	14.4	45	4.3	27.9	14.4	42	2.5	355.7	14.4	42
2019-05-27	01:00:00	2	16.1	13.3	49	2.8	12.4	13.7	44	1.9	334.1	13.3	46
2019-05-27	02:00:00	2	10.6	12.1	52	2.3	12	12.9	46	2	328.1	12.5	48
2019-05-27	03:00:00	1.1	33.6	11.4	55	2.2	8.9	12.1	50	1.5	336.4	11.5	52
2019-05-27	04:00:00	1.7	17	10.6	59	2.1	347.5	11.2	53	1.8	329.8	10.7	55
2019-05-27	05:00:00	1.3	27.4	10	61	1.7	12.5	10.5	56	1.5	326.5	9.9	59
2019-05-27	06:00:00	1.6	9	9.4	64	1.6	338.1	9.9	58	1.6	304.6	9.4	61
2019-05-27	07:00:00	1.6	18.2	9.6	64	1.6	341.2	10.4	57	2	304.8	10	60
2019-05-27	08:00:00	1.5	23.5	11.3	59	2.1	24.8	11.9	52	1.6	340.4	11.5	55
2019-05-27	09:00:00	1.4	45.9	13.3	52	1.9	41.2	13.2	49	1.3	358.7	13.1	50
2019-05-27	10:00:00	3.1	114	15.6	40	2.3	72	15.5	38	2.2	52.6	15.7	38
2019-05-27	11:00:00	2.4	128.2	16.6	36	2	74.5	16.7	33	1.9	74.5	16.8	33
2019-05-27	12:00:00	2.6	112.1	17.8	30	1.7	93.8	18	28	1.8	49.3	17.9	28
2019-05-27	13:00:00	2.6	83.6	18.7	30	2.1	73.6	18.8	26	1.9	19.5	18.6	27
2019-05-27	14:00:00	2.2	54.8	19.5	28	1.7	61.7	19.8	25	1.9	12.9	19.4	26
2019-05-27	15:00:00	2.2	101.5	20.7	25	1.7	75.3	20.6	22	1.8	36.2	20.3	23
2019-05-27	16:00:00	1.7	147.1	21.2	23	1.3	71.7	20.9	20	1.6	70.1	21	21
2019-05-27	17:00:00	2.4	116	21.2	22	2.2	75.4	21.2	19	1.9	86.2	21.2	20
2019-05-27	18:00:00	2.5	124.2	21	21	2	71.2	20.9	18	1.7	77.4	21.1	19
2019-05-27	19:00:00	2	144.8	20.8	22	1.2	85.8	20.6	19	1.6	87.1	20.7	20
2019-05-27	20:00:00	1.5	142.7	20.4	24	1.3	106.1	20.1	21	1.3	90.1	20.3	22
2019-05-27	21:00:00	1.6	131.9	19.7	26	1	99	19.6	22	0.9	81.1	19.8	24
2019-05-27	22:00:00	1.4	122.9	19.2	28	0.5	117.1	19.2	24	0.6	80.3	19.3	25
2019-05-27	23:00:00	0.7	133.9	18.6	28	0.5	131.5	19	25	0.4	140.6	19	26
2019-05-28	00:00:00	0.4	181.9	18.3	29	0.5	206	18.4	31	0.4	124.9	18.7	26
2019-05-28	01:00:00	0.5	3.8	17.5	32	0.4	226	17.2	33	0.2	98.8	18.1	28
2019-05-28	02:00:00	0.9	1.5	15.5	42	0.5	295.6	15.9	37	1	290.9	15.8	37
2019-05-28	03:00:00	1	9.8	14	47	0.7	324.9	15	41	1	324.3	14.6	40
2019-05-28	04:00:00	1	6	12.6	53	0.9	7.8	14.4	40	1	322.7	13.3	45
2019-05-28	05:00:00	1.2	6.8	11.9	55	0.6	297.8	13.7	46	1.1	321.2	12.7	47
2019-05-28	06:00:00	0.7	30.2	12.3	50	1.2	302.6	13.4	44	0.4	284.2	13.3	43
2019-05-28	07:00:00	0.6	30	14.9	45	1.2	292.1	14.7	45	0.8	294.8	14.9	44
2019-05-28	08:00:00	1.4	310.8	16.6	46	2.2	238.6	15.9	45	1.9	262.9	16.3	45
2019-05-28	09:00:00	2.1	287.7	17.2	45	3	241	16.9	44	2	256.3	17.3	43
2019-05-28	10:00:00	2.6	279.1	18.2	42	2.5	234.2	18.1	39	1.9	253.1	18.5	39
2019-05-28	11:00:00	2.6	258.8	19.3	39	2.6	232.3	19.2	37	1.6	254.1	19.7	36
2019-05-28	12:00:00	2.1	252	20.6	36	2.2	247.6	20.3	33	1.6	248.4	20.7	33
2019-05-28	13:00:00	2.1	246.2	21.8	32	2.3	215.1	21.4	29	1.4	143.2	22.1	28
2019-05-28	14:00:00	2.5	293	22	31	2.4	204.9	22.3	28	1.4	103.9	22.8	27
2019-05-28	15:00:00	2.6	250.1	23	30	1.6	196.8	23	26	1.4	223.2	23.6	26
2019-05-28	16:00:00	1.9	263.1	24.1	28	2.3	228.7	23.6	26	1.4	131.7	24.2	25
2019-05-28	17:00:00	2.2	265.1	24.3	28	1.6	222.3	24.2	24	1.4	225.9	24.7	25
2019-05-28	18:00:00	2.7	248	24.5	28	1.7	219.8	24.1	25	1.3	126.6	24.8	25
2019-05-28	19:00:00	1.9	237.4	24.4	28	1.9	223.2	24.1	24	1.2	224.8	24.7	25
2019-05-28	20:00:00	2.3	249.2	23.5	30	2.7	213.3	23.3	26	1.1	243.6	23.8	26
2019-05-28	21:00:00	2.1	243.3	22.6	31	1.8	217.5	22.1	28	0.7	236.7	22.4	28
2019-05-28	22:00:00	1.5	240.1	21.7	33	1.8	214.2	21.2	30	0.7	247.3	21.4	30
2019-05-28	23:00:00	1.7	249	20.5	37	1.9	228.4	20	35	1.3	247.8	20.1	35
2019-05-29	00:00:00	2	267.8	18.4	47	—	—	—	—	2.2	249.8	18.2	44
2019-05-29	01:00:00	1.2	275.1	17.2	51	1.4	245.2	16.9	47	1.3	250.6	17	49
2019-05-29	02:00:00	0.9	339.4	16.3	55	0.8	243.7	15.9	52	0.9	311.9	16.4	52
2019-05-29	03:00:00	0.8	293.3	15.6	58	0.6	264.2	15.6	54	0.6	277.4	15.6	55
2019-05-29	04:00:00	0.9	15.8	15.3	58	1	306.9	14.9	57	0.6	320.1	15.3	55
2019-05-29	05:00:00	0.7	15.9	14.1	63	0.5	227.9	13.7	61	0.6	281.9	14.7	57
2019-05-29	06:00:00	0.9	4.4	13.2	67	0.6	229.9	13	64	0.4	111.2	14.3	61
2019-05-29	07:00:00	1	239	14.1	64	0.6	218.6	14	61	0.6	146.1	14.2	61
2019-05-29	08:00:00	1.4	229.3	15.7	59	1.2	223	15	58	0.8	236.2	15.9	57
2019-05-29	09:00:00	1	207.6	18	52	1.2	205.6	17	51	0.9	234.8	17.6	50
2019-05-29	10:00:00	1.3	248.8	19.5	46	1	206.3	19.5	43	0.8	309.6	19.5	43
2019-05-29	11:00:00	1.2	177.7	21.2	42	1	118.4	21	38	1	46.1	20.9	39
2019-05-29	12:00:00	1.4	293.9	22.5	39	1.1	33	22.5	35	1.1	187.3	22.7	35
2019-05-29	13:00:00	1.8	276.1	24.3	34	1.8	221.6	23.9	31	1.1	106.1	24.9	30
2019-05-29	14:00:00	2.5	257	25.1	29	1.9	204	25.3	24	1.4	166.9	25.3	26
2019-05-29	15:00:00	2	274.2	25.9	25	2	191	25.6	20	1.4	261.3	26	22
2019-05-29	16:00:00	1.6	316.5	26	23	—	—	—	—	1.2	85.3	26.4	20
2019-05-29	17:00:00	1.3	169.3	26.1	22	1.7	220.3	25.6	20	1.2	117.9	26.2	20
2019-05-29	18:00:00	1.6	343.3	26	22	1.4	266.5	25.6	19	0.8	302.6	25.9	20
2019-05-29	19:00:00	1.5	8.9	25.5	23	1.5	310.8	25.2	20	1.2	338.7	25.4	20
2019-05-29	20:00:00	1.6	9.4	25	24	1.4	314.7	24.7	21	1.2	303.1	24.9	22
2019-05-29	21:00:00	0.9	17.2	23.6	28	1.3	318.6	23.7	23	1.3	305.3	24	23
2019-05-29	22:00:00	0.5	64.6	22.6	29	1.3	297.7	22.3	25	1	297	23.1	24
2019-05-29	23:00:00	0.7	26	22.1	30	0.7	280.9	21.8	27	1.2	255.2	22.7	25
2019-05-30	00:00:00	1.2	225.4	22.3	29	1	289.1	21.4	28	0.8	298.6	22.7	25
2019-05-30	01:00:00	1.2	355.5	22.4	29	1.4	277.4	21.6	27	1	292.5	22.4	25
2019-05-30	02:00:00	1.3	328.5	21.2	31	1.8	268	21.2	27	1.3	294	21.3	28
2019-05-30	03:00:00	1.2	17.2	20.5	33	1.4	305.1	20.3	31	1.2	315.9	20.6	30
2019-05-30	04:00:00	1.4	53.4	19.8	36	2.3	24.2	20.2	31	1.4	342.5	19.7	33
2019-05-30	05:00:00	1.3	57.1	19.9	36	2	28.4	20.4	30	1.5	332.2	19.8	33
2019-05-30	06:00:00	1.5	24.4	19.7	36	1.9	12.4	20	32	1.5	324.5	19.5	34
2019-05-30	07:00:00	1.7	12.8	19.4	38	2.1	17.8	19.8	32	1.4	328.7	19.2	35
2019-05-30	08:00:00	1.9	64.8	21.1	32	2.2	30.8	20.8	29	1.5	354.7	20.8	30
2019-05-30	09:00:00	2.4	30.5	22.2	31	2.1	14.2	22.2	27	2	333.4	22	29
2019-05-30	10:00:00	2.3	40.5	23.9	27	3.5	18.2	23.4	24	3.1	356.5	23.5	25
2019-05-30	11:00:00	2.9	56.8	24.4	22	4.1	31.3	23.7	20	2.7	1.9	24.1	21
2019-05-30	12:00:00	3.2	51.6	24.7	20	3.7	18.5	24.2	18	2.8	342.9	24.6	19
2019-05-30	13:00:00	3.4	56.8	25.5	19	4.2	13.6	25	16	3.6	343.1	25.2	17
2019-05-30	14:00:00	3.4	51.1	25.8	18	3.9	36.8	25.3	15	3.2	354.5	25.6	16
2019-05-30	15:00:00	3.8	36.9	26	18	3.8	27.1	25.6	15	3.7	347.6	25.8	16
2019-05-30	16:00:00	2.9	28.5	26.3	18	4.2	31	25.5	16	2.9	1	26	16
2019-05-30	17:00:00	3.8	69.5	26.2	18	4	31.3	25.7	16	3.1	0.6	26.1	16
2019-05-30	18:00:00	3.2	55.7	26.1	18	4.1	28.2	25.4	16	3.2	359.9	25.7	17
2019-05-30	19:00:00	3.7	69.8	25.1	19	3.5	51.3	24.6	16	3.3	8.7	24.8	17
2019-05-30	20:00:00	3	73.1	23.6	15	3	61	23.4	13	2.2	9.7	23.4	14
2019-05-30	21:00:00	2.4	70.4	22.1	13	2.3	49.2	22.1	11	1.8	356.7	21.8	11
2019-05-30	22:00:00	2	69.3	20.6	15	1.8	40.3	20.8	12	1.5	349.8	20.3	14
2019-05-30	23:00:00	1.2	35	19.1	18	2	36.3	19.8	14	1	302.9	18.7	17
2019-05-31	00:00:00	1.7	8	17.2	22	2	33.6	18.4	16	1.1	326.6	17.2	20
2019-05-31	01:00:00	1.6	3.1	15.4	27	1.4	9.7	16.9	20	1.1	321.5	15.6	23
2019-05-31	02:00:00	1	5.5	14	30	0.8	323.1	15.4	23	1.2	309.7	14.5	25
2019-05-31	03:00:00	1.3	15.7	12.7	32	1	0.7	14.5	25	1.3	332.7	13.7	27
2019-05-31	04:00:00	1.3	11.1	11.4	37	0.6	336.8	13.5	29	1	302.1	12.4	30
2019-05-31	05:00:00	1.5	14.2	10.3	42	0.7	322.6	12.2	35	1.1	321.2	11.4	32
2019-05-31	06:00:00	1.6	6.6	9.3	45	0.7	318.2	11.4	39	1	320.7	10.6	34
2019-05-31	07:00:00	1.5	4.4	9.9	44	0.7	13.2	12.4	33	0.9	334.1	11	35
2019-05-31	08:00:00	1.4	358.1	11.6	43	0.7	43.1	14.7	29	1.1	332.7	12.6	34
2019-05-31	09:00:00	0.6	264.7	16.9	31	1.2	224.6	16.7	24	0.6	262.4	16.8	26
2019-05-31	10:00:00	1.4	221.7	20	23	1.8	198.2	19.2	19	1	177.6	19.9	20
2019-05-31	11:00:00	2	230.6	21.4	19	2	183	21	16	1.2	104.1	21.7	17
2019-05-31	12:00:00	1.7	226.4	22.6	17	1.7	175.7	22.2	15	1.4	101.9	22.7	16
2019-05-31	13:00:00	2	261	23.5	18	1.8	192.9	23.6	14	1.2	173	24.4	15
2019-05-31	14:00:00	2	223.4	24.8	18	2.4	215.2	24.4	15	1.2	228.3	25.4	15
2019-05-31	15:00:00	1.8	252.3	25.8	18	1.4	133.8	25.6	14	1.3	131.2	25.8	15
2019-05-31	16:00:00	1.8	204.3	26.5	17	1.2	5.8	26.9	14	1.2	123.5	26.9	15
2019-05-31	17:00:00	1.6	277.3	26.6	17	1.6	234.3	26.7	14	1.4	242.3	26.7	15
2019-05-31	18:00:00	2.4	283.4	26	18	2	251.9	26.1	15	2	267.3	26.2	16
2019-05-31	19:00:00	2.8	296.7	25.5	21	4.1	245.8	25.2	18	2.7	271.8	25.4	19
2019-05-31	20:00:00	3.1	345.2	24	25	4	303.1	23.6	23	4.2	283	23.9	23
2019-05-31	21:00:00	1.9	3.2	22.4	29	2.3	332.5	22.5	25	2.2	297.4	22.5	26
2019-05-31	22:00:00	1.4	285.2	21.9	31	1.1	243.1	21.9	28	1.4	259.6	22	28
2019-05-31	23:00:00	1.9	274.7	21	35	2.4	246.7	21	32	1.8	253.3	20.7	33
2019-06-01	00:00:00	1.9	263.9	19.8	38	2.3	239.2	20	35	1.8	247.4	19.6	36
2019-06-01	01:00:00	1.3	280.7	18.7	42	0.9	265	18.6	40	1	249.6	18.5	39
2019-06-01	02:00:00	0.9	19.8	17.2	46	1.8	288.2	17.1	44	1.7	277.3	17.8	42
2019-06-01	03:00:00	1.1	28.7	16.1	49	1.9	297.7	16.2	47	1.4	297.5	16.9	44
2019-06-01	04:00:00	1.1	16.2	15.2	51	0.9	2.1	15.9	47	1	331	15.4	48
2019-06-01	05:00:00	0.7	229.3	15.2	52	0.8	207.6	15.8	48	0.5	142	15.7	47
2019-06-01	06:00:00	1.7	224.5	15.5	52	1.9	219.6	14.7	52	0.7	221.4	15.4	50
2019-06-01	07:00:00	1.5	252.5	15.4	54	1.4	225	14.7	53	0.9	246.7	15.2	52
2019-06-01	08:00:00	1.3	23	15.9	54	0.9	305.3	16.3	51	1.1	340.4	16.1	51
2019-06-01	09:00:00	0.7	63.2	19	47	0.7	58.8	19.1	44	0.8	46	18.8	45
2019-06-01	10:00:00	1.3	350.3	21.4	42	2.3	249	20.9	39	1.7	272.4	21.2	39
2019-06-01	11:00:00	2.5	351.6	21.9	40	2.8	289.8	21.9	36	2.4	286	22.3	36
2019-06-01	12:00:00	2.6	345.8	23.5	35	3	301.2	23.3	31	3.2	280.5	23.8	31
2019-06-01	13:00:00	2.6	351.1	25.1	28	3	330.1	25.1	24	3.2	290.3	25.3	25
2019-06-01	14:00:00	3	355.6	26.5	24	—	—	—	—	2.8	302.9	26.6	21
2019-06-01	15:00:00	2.4	22.5	27.5	21	3	303.4	27.4	18	2.4	319.6	27.5	19
2019-06-01	16:00:00	2.6	15.5	28.2	21	2.2	353.8	27.8	17	2.3	303.8	28.2	18
2019-06-01	17:00:00	2	11.5	28.8	19	1.8	311	28.7	15	1.9	301	28.7	16
2019-06-01	18:00:00	1.1	318.8	28.8	19	1.1	338.3	28.8	15	1.2	9.6	28.5	17
2019-06-01	19:00:00	1	354.1	29	19	—	—	—	—	0.8	311.8	28.8	16
2019-06-01	20:00:00	1.2	246.1	27.9	20	1.3	201.1	27.5	17	0.6	150.3	27.8	17
2019-06-01	21:00:00	2.3	219.7	26.5	24	2	208.6	25.9	22	0.4	232.6	26.2	22
2019-06-01	22:00:00	2.2	220.6	25.6	26	1.8	201.9	24.8	23	1.1	350.9	25.1	24
2019-06-01	23:00:00	1.1	211.5	24.4	27	0.9	154	24.3	24	0.6	108.2	24.6	24
2019-06-02	00:00:00	1.4	225.7	23.3	29	1.4	196.5	23.4	25	0.5	191.5	23.5	26
2019-06-02	01:00:00	0.8	246.3	22.4	31	1	222.7	21.7	29	0.5	227.1	22.5	29
2019-06-02	02:00:00	1	347.2	21.3	35	0.7	245.3	20.6	33	0.7	256	21.9	29
2019-06-02	03:00:00	0.5	15.2	20.2	36	0.7	242	19.9	32	0.3	195.4	21	30
2019-06-02	04:00:00	0.6	236.9	19.4	41	0.7	221.7	19.3	32	0.3	182	19.8	33
2019-06-02	05:00:00	1	238.1	18.4	43	—	—	—	—	0.7	250	18.7	33
2019-06-02	06:00:00	1.2	253.4	18.2	33	0.9	247.8	17.7	30	0.5	206.7	18	30
2019-06-02	07:00:00	0.8	339.3	17.7	36	0.8	242.3	17.5	30	0.6	264.1	17.8	33
2019-06-02	08:00:00	1	239.2	19.6	32	0.9	220	18.9	28	0.7	217.6	19.3	28
2019-06-02	09:00:00	1.8	239.9	20.9	30	1.5	211.5	20.8	26	0.8	207.2	21.3	28
2019-06-02	10:00:00	1.1	225.3	24.5	26	1.2	254.4	24	21	1	258.7	24.9	22
2019-06-02	11:00:00	2.3	294.4	27.4	19	2.6	275.1	27.1	16	2.9	277	27.6	16
2019-06-02	12:00:00	3.2	324.9	28.8	15	—	—	—	—	3.6	274.8	29.2	12
2019-06-02	13:00:00	3.8	356.4	29.8	13	3.9	301.5	29.6	10	4.3	285.8	30	10
2019-06-02	14:00:00	3	336.7	30.6	13	4	298.3	30.3	10	4.1	283.1	30.7	10
2019-06-02	15:00:00	3.7	347.2	31.1	12	4.8	301.4	30.7	10	4.1	288.2	31.1	10
2019-06-02	16:00:00	4	358.1	31.1	11	3.9	305	30.9	9	4	296.5	31.4	9
2019-06-02	17:00:00	3.8	355.9	31.2	12	4.4	304.5	30.8	9	3.9	295.3	31.4	10
2019-06-02	18:00:00	3.9	3.4	31	12	3.9	307	30.8	10	4.1	301	31	10
2019-06-02	19:00:00	2.9	16.8	30.6	13	3.1	341.2	30.3	10	3	312.8	30.5	11
2019-06-02	20:00:00	2.2	11	29.2	14	2.6	345.9	29.1	11	2.2	312	29.2	12
2019-06-02	21:00:00	0.8	31.5	27.3	16	2.3	25.2	27.7	13	1.2	339.3	27.2	15
2019-06-02	22:00:00	1.5	8.8	25.2	20	1.8	2.7	26	15	1	316.4	25.1	18
2019-06-02	23:00:00	1.5	8.8	23	25	2.1	26.1	24.5	18	1.3	324.1	22.9	21
2019-06-03	00:00:00	1.5	19	21.7	29	1.8	31.1	22.6	24	1.2	318.9	21.3	26
2019-06-03	01:00:00	1.4	7.6	20.3	32	1.2	19.7	21.7	25	0.9	294.4	20.2	29
2019-06-03	02:00:00	0.7	8.9	19	35	0.8	326.8	20.2	31	0.9	286.8	19.2	31
2019-06-03	03:00:00	0.6	29	18.4	37	0.8	270.8	19.1	31	0.6	262.2	19.6	30
2019-06-03	04:00:00	1.1	14.6	17.7	39	0.6	262.2	17.9	34	0.4	68.7	19	34
2019-06-03	05:00:00	1	4.4	15.7	43	0.5	306.5	16.5	39	0.7	335.1	17	38
2019-06-03	06:00:00	1.1	15	13.9	50	0.8	337.6	15.5	44	1.1	328.5	14.9	43
2019-06-03	07:00:00	1.6	356.7	14	53	1.4	350.6	15.7	41	1.2	312	14.4	45
2019-06-03	08:00:00	1.6	353.4	16	47	1.2	13.4	17.8	35	1	343.8	17	39
2019-06-03	09:00:00	0.9	342.3	20.3	36	0.7	179	21	31	0.6	297.9	20.6	32
2019-06-03	10:00:00	0.8	190	24.4	28	1.1	189.7	23.7	25	0.8	180.4	24.4	25
2019-06-03	11:00:00	1.5	223	26.7	24	1.3	203.1	26.2	21	1.2	155.6	26.6	20
2019-06-03	12:00:00	1.6	244.8	27.8	18	1.5	165.7	27.4	16	1.2	98.4	28.2	16
2019-06-03	13:00:00	2.2	246.3	28.9	17	1.7	220.2	28.7	14	1.5	132.8	29.1	15
2019-06-03	14:00:00	2.2	197.6	30.2	15	1.7	178.5	29.8	12	1.4	111	30.1	13
2019-06-03	15:00:00	2.3	282.6	30.5	14	2.4	282.3	30.4	10	1.9	272.5	30.9	11
2019-06-03	16:00:00	2.3	327.7	31.2	13	1.9	289.3	30.9	10	2.3	299.4	31.1	11
2019-06-03	17:00:00	2.2	0.4	31	14	1.2	221.1	30.8	11	1.5	273.5	31.2	12
2019-06-03	18:00:00	1.6	336.3	31.6	14	0.9	331.1	31.5	11	1.3	284.9	31.6	12
2019-06-03	19:00:00	1.1	265.9	31.3	14	0.8	300.3	31	11	0.8	257.4	31.2	12
2019-06-03	20:00:00	1.3	213.6	30.3	15	1.2	160.9	29.7	13	0.8	121.1	30	14
2019-06-03	21:00:00	2.2	220.9	28.8	17	2.1	197.4	28.2	15	0.7	180.2	28.5	15
2019-06-03	22:00:00	1.7	230.9	27.5	21	2.4	212.9	26.8	20	0.6	197.9	27.1	20
2019-06-03	23:00:00	1.3	211.7	26.4	24	1.7	191.8	26.2	22	0.5	149	26.1	22
2019-06-04	00:00:00	0.9	206.3	24.8	27	1.5	186.1	25	23	0.5	129.5	24.9	25
2019-06-04	01:00:00	1.8	215.7	24.1	28	1.2	187.5	23.7	26	0.4	157.2	23.8	27
2019-06-04	02:00:00	1.3	214	23.2	30	1.3	196	23	27	0.5	151.2	23.1	28
2019-06-04	03:00:00	0.9	201.6	22.2	32	1.2	191.3	22.2	29	0.4	161.3	22.2	29
2019-06-04	04:00:00	1.8	6.8	19.9	39	1.5	329.8	20.4	33	1.4	317.2	19.9	35
2019-06-04	05:00:00	1.3	341.8	18.7	43	0.8	333.2	19.9	34	1	304.1	18.9	38
2019-06-04	06:00:00	1.1	328.1	19.2	43	1.1	242	19.8	37	0.7	299.8	19.5	39
2019-06-04	07:00:00	1	349	18.9	46	0.5	331.7	19.8	40	0.8	295.4	19.1	41
2019-06-04	08:00:00	1	245.2	20.9	43	1.1	179.4	21.6	37	0.5	136.6	21.8	36
2019-06-04	09:00:00	1.9	238	22.8	39	1.7	209	22.5	35	1.1	126.5	23.2	34
2019-06-04	10:00:00	2.6	237.2	24.4	35	2.1	176.6	24.2	31	1.1	116.9	24.8	31
2019-06-04	11:00:00	2	222	25.6	32	1.8	185.3	25.2	28	1.2	113.6	25.7	28
2019-06-04	12:00:00	2	234.9	27.4	28	1.3	181.4	27.5	25	1	115.4	27.8	26
2019-06-04	13:00:00	1.6	273.9	28.5	23	1.3	280.3	28.8	19	1.1	60.8	29	20
2019-06-04	14:00:00	1.3	283.9	29.8	21	1.3	47.8	29.8	18	1.2	330.9	29.8	18
2019-06-04	15:00:00	1.8	326.9	30.2	21	1.9	277.1	29.9	17	1.4	267.3	30.6	18
2019-06-04	16:00:00	2.1	288.7	30.2	21	2.5	271.1	30	17	1.9	260.9	30.5	18
2019-06-04	17:00:00	2.5	272.4	30.1	22	2.3	240.6	30	18	2	256.3	30.4	18
2019-06-04	18:00:00	3.1	251.6	30.1	22	3	228	29.8	18	1.6	242.9	30.2	18
2019-06-04	19:00:00	3.2	247.4	29.6	22	—	—	—	—	1.6	244.5	29.5	20
2019-06-04	20:00:00	4.3	247.3	27.1	30	5	225.6	26.5	27	2.2	249.1	27	28
2019-06-04	21:00:00	3.7	241.6	25.8	33	—	—	—	—	1.1	238.2	25.6	31
2019-06-04	22:00:00	2.1	289.2	24.6	36	2.4	242.5	24.4	33	1.9	262.4	24.4	34
2019-06-04	23:00:00	1.2	294.1	23.8	38	1.6	237.6	23.4	35	1.7	257	23.5	36
2019-06-05	00:00:00	1.8	259.7	22.8	41	2.2	228.6	22.5	39	1	243.5	22.6	39
2019-06-05	01:00:00	1.5	308	21.7	46	—	—	—	—	1.5	268.9	21.5	43
2019-06-05	02:00:00	1.2	305.5	21	48	1.4	238.4	20.7	46	0.9	265.9	21	46
2019-06-05	03:00:00	2.7	244.4	20.5	53	2.7	218.3	20.1	50	1	235.5	20.3	50
2019-06-05	04:00:00	2.5	263.1	19.8	57	3	238.7	20	53	2.4	251.8	19.5	55
2019-06-05	05:00:00	2.1	256.4	19.2	59	2	228.4	19.2	55	1.6	245.7	19	57
2019-06-05	06:00:00	1.8	245.7	18.8	61	1.6	218.4	19	56	0.9	234.5	18.7	58
2019-06-05	07:00:00	1.8	251.1	19	61	1.9	206.1	19.2	56	1.1	232.2	19	58
2019-06-05	08:00:00	2.6	223.4	19.5	60	2.4	198.8	19.2	57	0.8	162.7	19.6	56
2019-06-05	09:00:00	4	226.8	19.7	60	3.6	201.3	19.4	57	1.5	176.1	20	55
2019-06-05	10:00:00	4.3	230.3	19.7	65	4.6	197.7	19.2	62	1.9	176.8	20	59
2019-06-05	11:00:00	3.9	239.2	20	64	4.2	208	19.6	61	1.7	188.9	20.4	58
2019-06-05	12:00:00	3.4	227.6	21	59	3.3	192	20.6	56	1.5	192.1	21.7	53
2019-06-05	13:00:00	3.2	231.7	21.9	56	2.8	204.3	21.5	53	1.8	155.5	22.4	51
2019-06-05	14:00:00	2.3	237.9	23.3	52	2.6	193.2	22.7	49	1.5	136	23.5	47
2019-06-05	15:00:00	2.5	236.9	24.4	48	2	189	24	44	1.6	187.3	24.7	43
2019-06-05	16:00:00	2.4	221.5	25.1	45	2.9	204.3	24.4	43	1.6	126.4	25.3	41
2019-06-05	17:00:00	2.3	204.3	25.6	43	2.1	185	25.1	41	1.7	103.7	25.5	40
2019-06-05	18:00:00	2.6	216	25.7	44	3.6	179.9	24.2	45	1.7	133.6	25.4	41
2019-06-05	19:00:00	3	216.9	24.4	47	3.3	174.3	23.4	46	1.9	118.3	24.2	44
2019-06-05	20:00:00	2.9	213.4	22.9	51	3	174.9	22.2	49	1.8	111.4	22.6	49
2019-06-05	21:00:00	2.4	214.7	21.3	57	2.9	174.8	20.6	58	1.6	117.7	21	55
2019-06-05	22:00:00	3.6	220.7	20	64	2.9	177.2	19.4	63	1.5	146	19.9	61
2019-06-05	23:00:00	3.6	219.9	18.9	70	3.1	174.1	18.5	68	1.5	126.4	18.9	66
2019-06-06	00:00:00	3.2	221.6	18.2	75	2.3	197.6	17.8	72	1.4	143.8	18.1	70
2019-06-06	01:00:00	2.3	216.1	17.5	76	1.6	206.5	17.2	73	1.2	158.6	17.6	71
2019-06-06	02:00:00	1.7	219	17	78	1.4	207.4	16.8	73	0.9	176.3	17.2	72
2019-06-06	03:00:00	1.1	219.2	16.6	79	0.8	191.8	16.3	75	0.6	104	16.7	74
2019-06-06	04:00:00	0.7	189.7	15.9	81	0.8	166.8	15.7	77	0.8	97.2	16	77
2019-06-06	05:00:00	0.9	160.1	15.1	85	1	153.6	15.2	80	0.8	101.6	15.4	80
2019-06-06	06:00:00	0.9	179.7	15	87	0.8	145.6	15	81	0.7	128.6	15.2	81
2019-06-06	07:00:00	0.5	180.5	16.3	83	0.5	183.7	16.2	78	0.9	97.2	15.8	80
2019-06-06	08:00:00	1.8	228.2	17.6	81	1.3	194.3	17.1	77	1.4	100.4	17.1	78
2019-06-06	09:00:00	2.9	227.4	18.2	80	2	199.5	18.2	74	1.3	131.5	18.9	71
2019-06-06	10:00:00	2.1	233.1	20.1	71	2.3	194.1	19.7	66	1.6	113	20.4	65
2019-06-06	11:00:00	2.2	248.7	21.7	62	2.2	192.8	21.4	57	1.2	142.3	22.4	55
2019-06-06	12:00:00	2	231.5	23.8	54	2.4	210.5	23.2	50	1.3	150.1	24.1	48
2019-06-06	13:00:00	2.2	232.7	25.6	46	2.2	184.8	25.2	42	1.5	147.1	25.9	41
2019-06-06	14:00:00	2.7	239.6	27.6	37	2.3	191.8	27.1	33	1.4	168.2	28.1	32
2019-06-06	15:00:00	2.2	238.8	28.6	32	2	189.6	28.1	27	1.2	132.7	29.3	27
2019-06-06	16:00:00	1.7	41.5	28.2	31	1.8	34.7	28.2	27	1.7	12.3	28.2	28
2019-06-06	17:00:00	2.3	37	25.2	39	3.6	18.1	25.3	34	2.6	350.7	25.1	36
2019-06-06	18:00:00	2.3	292	24.5	42	1.9	250.2	25	37	1.8	273.8	25	38
2019-06-06	19:00:00	1.2	228.8	26.7	37	1.3	210.4	26.8	32	0.8	92.2	26.6	35
2019-06-06	20:00:00	2.7	232.9	26.1	40	2.8	220.7	25.6	38	1	220.8	26	37
2019-06-06	21:00:00	2.4	241.5	24.9	43	2.7	216.5	24.5	40	1	213.2	24.8	40
2019-06-06	22:00:00	2	224.4	24.2	45	1.3	199.2	23.8	42	0.6	152.4	23.9	42
2019-06-06	23:00:00	1	211.1	23.1	46	1.2	189	23	43	0.7	102	23	44
2019-06-07	00:00:00	1.4	228.8	22.4	48	1.4	192.5	22.3	45	0.5	121	22.4	45
2019-06-07	01:00:00	1.7	216.5	21.8	50	1.9	204.8	21.4	48	0.4	143.5	21.6	48
2019-06-07	02:00:00	1.5	221.9	21.2	52	1.5	202.6	20.9	50	0.6	121.4	21	50
2019-06-07	03:00:00	2	226	20.6	55	1.6	207.8	20.2	52	0.4	145.3	20.6	51
2019-06-07	04:00:00	2.4	220.4	20.3	59	2	205.6	19.8	56	0.5	147.7	20.2	54
2019-06-07	05:00:00	2.5	219.4	19.8	63	2.4	202.6	19.5	60	0.6	153.9	19.8	59
2019-06-07	06:00:00	1.1	176.1	19.2	66	0.8	147.5	19	62	0.9	112.2	19.4	62
2019-06-07	07:00:00	1.3	209	19.9	68	1.3	160.3	19.5	66	1.1	106.1	19.7	65
2019-06-07	08:00:00	2.4	223.6	20.7	70	2.1	186.1	20.2	68	1.1	116.5	21	65
2019-06-07	09:00:00	2.5	229	21.8	69	2.1	200	21.4	66	1	172	22.5	61
2019-06-07	10:00:00	2.5	229.4	23	65	2.6	215.3	22.8	61	1.1	148.6	23.7	58
2019-06-07	11:00:00	1.5	228	24.7	58	1.6	214.2	24.4	55	1	143.2	25	53
2019-06-07	12:00:00	0.9	265	26.2	52	1.2	200.1	26.1	47	1	102.3	26.2	49
2019-06-07	13:00:00	2.3	280.4	26.4	50	2.3	244.2	26.2	46	2	260.7	26.7	46
2019-06-07	14:00:00	2.8	298.1	25.9	52	2.9	261.1	25.6	48	2.8	263.2	26	48
2019-06-07	15:00:00	2.6	315.3	25.7	52	3.4	284.5	25.4	48	3.2	270.9	25.8	48
2019-06-07	16:00:00	3.6	305.4	24.3	51	3.8	262.8	23.4	53	4.4	261.2	24	50
2019-06-07	17:00:00	2.2	20.1	20.7	71	3.1	8.1	20.6	65	2.4	313.1	20.3	70
2019-06-07	18:00:00	1.8	52.1	20.8	66	2.4	24.8	20.7	61	1.5	342.1	20.3	65
2019-06-07	19:00:00	1.6	17.1	21.7	52	1.5	45.5	21.8	48	1.2	344.9	21.7	48
2019-06-07	20:00:00	1.3	111.9	21.4	53	1.1	49.6	21.1	53	1.1	45.8	21.6	50
2019-06-07	21:00:00	1.5	209	19	67	1.6	172.9	19.6	58	1.1	123.6	19.2	61
2019-06-07	22:00:00	2	218.5	18.4	69	2.7	188	18.3	65	1.3	139.7	18.5	64
2019-06-07	23:00:00	1.2	229.9	17.5	75	1.9	213.7	17.3	72	0.7	201.4	17.6	70
2019-06-08	00:00:00	1.1	353.4	16.9	80	0.9	291.7	16.4	77	1.1	290.8	16.6	76
2019-06-08	01:00:00	0.6	14.1	15.8	85	0.5	279.8	16	80	0.9	287.5	16.1	78
2019-06-08	02:00:00	0.5	19.2	15.5	85	0.5	238.3	15.4	81	0.5	286	16	77
2019-06-08	03:00:00	0.5	222.5	15.4	88	0.8	225.1	15	82	0.3	195.4	15.8	79
2019-06-08	04:00:00	0.7	346.2	14.9	90	0.4	249.6	14.2	86	0.5	248.3	15.1	80
2019-06-08	05:00:00	0.9	10.3	13.3	94	0.3	261.6	14	84	0.6	318.9	14.3	83
2019-06-08	06:00:00	1.1	10.2	12.5	96	0.6	316.3	13.7	85	1.1	314.6	12.9	86
2019-06-08	07:00:00	1	357.4	13	94	0.5	0.1	15.3	78	1	326.9	13.2	88
2019-06-08	08:00:00	0.9	304.8	15.4	84	0.7	237.2	16.7	73	0.6	319.3	15.9	76
2019-06-08	09:00:00	0.9	230.6	19.8	66	1.1	199.6	18.7	66	0.8	185.5	19.4	65
2019-06-08	10:00:00	1.3	313.7	22.1	57	1.3	252.8	21.8	55	1.5	278	22.4	51
2019-06-08	11:00:00	1.7	299.6	24.3	46	1.7	287.5	23.9	45	1.6	290.4	24.4	41
2019-06-08	12:00:00	2.2	284	26	38	1.8	282.2	25.9	34	1.9	278.6	26.2	34
2019-06-08	13:00:00	2.2	301	27.4	32	2.3	249	27.3	28	2.1	264.9	27.9	28
2019-06-08	14:00:00	2.4	298.9	28.5	29	2.6	247.8	28.3	26	2.1	270.7	29	26
2019-06-08	15:00:00	2.9	317	29.5	27	3	286.8	29.2	23	2.8	269.4	29.9	23
2019-06-08	16:00:00	2.6	317.4	30	25	2.8	287.5	30	20	2.7	276.3	30.5	21
2019-06-08	17:00:00	2.3	333.4	30.5	24	2.5	292.3	30.6	20	2.5	290.4	30.8	21
2019-06-08	18:00:00	2.4	341.9	31	23	2.7	304	30.4	20	2.4	285.3	31.1	21
2019-06-08	19:00:00	2.4	342.2	30.9	24	3.1	297.3	30.4	21	2.6	287.1	30.8	21
2019-06-08	20:00:00	1.6	65.8	29.8	24	1.6	333.9	29.2	22	1.4	358.7	29.2	23
2019-06-08	21:00:00	1	350.7	28	28	1.2	286.9	27.6	25	0.9	273.5	27.7	25
2019-06-08	22:00:00	0.9	16.1	25.9	33	1	303.7	25.8	28	1.1	299.6	26.4	28
2019-06-08	23:00:00	0.9	20.3	24.2	35	0.6	296	24.1	31	0.8	351.3	24.8	32
2019-06-09	00:00:00	0.7	20.3	22.5	40	0.5	304.7	23.1	35	0.5	322.7	23.1	35
2019-06-09	01:00:00	1.2	11.7	21.2	44	0.8	23.6	22.2	40	1	339.9	21.9	39
2019-06-09	02:00:00	1.4	7.4	20	50	1.3	28.5	21.4	40	1.3	336.9	20.4	44
2019-06-09	03:00:00	1.3	8.6	18.1	56	1.2	1.3	19.9	44	1.1	321.7	18.8	49
2019-06-09	04:00:00	1.3	8.1	17.3	57	1.1	8.2	19	43	1.4	332.6	17.8	49
2019-06-09	05:00:00	1.2	11	16.5	55	1.4	356.6	18.5	38	1	304	17.6	42
2019-06-09	06:00:00	1.4	14.8	16	51	1.1	19.7	18.3	35	1	337.1	17.1	39
2019-06-09	07:00:00	1.6	1.9	16.3	50	1.6	22.1	18.6	33	1.4	329.8	16.7	40
2019-06-09	08:00:00	2.2	2.4	18.2	44	1.7	24.2	19.7	31	1.4	329.4	18.5	37
2019-06-09	09:00:00	1.8	36.3	21.9	34	1.4	11.7	22	29	1.4	346.4	21.9	31
2019-06-09	10:00:00	2.6	93.3	24.7	24	2.3	70.1	24.6	21	2	38.8	24.8	22
2019-06-09	11:00:00	2.3	82.2	25.7	23	1.7	61.3	25.7	20	1.9	19.3	25.6	21
2019-06-09	12:00:00	2.4	61.5	26.7	22	2	39.6	26.8	18	2	25.9	26.9	19
2019-06-09	13:00:00	2	74.1	27.7	20	1.7	34.1	27.8	17	1.6	1.9	27.8	18
2019-06-09	14:00:00	2.5	21.4	28.8	17	2.4	17.9	28.7	14	1.9	334.7	28.7	15
2019-06-09	15:00:00	2	39.5	29.7	17	2	353.6	29.4	14	1.8	345.1	29.6	15
2019-06-09	16:00:00	2.3	49	30.1	18	1.8	22.6	29.8	14	1.9	348	30	15
2019-06-09	17:00:00	1.9	37.2	30.2	18	1.4	30.1	30.2	15	1.6	339.6	29.9	16
2019-06-09	18:00:00	1.7	11.1	29.7	20	1.7	26.5	29.6	16	1.5	344.4	29.5	17
2019-06-09	19:00:00	1.1	69.1	29.7	19	1.3	54	29.3	16	1.2	17.5	29.4	18
2019-06-09	20:00:00	1.3	136.7	28.9	20	1	74.3	28.6	17	0.9	76.1	28.7	18
2019-06-09	21:00:00	1.5	133.7	27.8	22	0.6	111.2	27.5	19	0.6	80.1	27.5	20
2019-06-09	22:00:00	1.1	134.8	26.5	24	0.4	108.7	26.3	22	0.7	89.3	26.4	22
2019-06-09	23:00:00	1.5	123.5	25.5	26	0.5	80.4	25.3	24	0.5	64.4	25.2	24
2019-06-10	00:00:00	1.1	18.2	22.9	34	0.7	51.1	24	27	0.6	304.9	23.2	30
2019-06-10	01:00:00	0.8	19.9	20.1	41	0.8	322.7	21.6	35	1.2	285.8	20.6	35
2019-06-10	02:00:00	1.5	1.3	18.7	43	0.8	331.6	19.9	36	0.9	318.9	19.6	35
2019-06-10	03:00:00	1.3	0.8	17.8	46	0.7	315.8	19	40	1.1	310.6	18.5	38
2019-06-10	04:00:00	0.7	16.6	16.6	50	0.9	307.9	17.7	42	1.1	291.5	17.3	42
2019-06-10	05:00:00	1	10.5	16	48	0.7	17.2	17.4	43	0.7	321.6	17.4	40
2019-06-10	06:00:00	1.2	359.2	15.5	51	0.7	2	17.2	45	0.8	334.5	16.4	42
2019-06-10	07:00:00	0.8	354.4	16.4	49	0.7	337.2	17.5	44	1	334.3	16.6	42
2019-06-10	08:00:00	1	358.1	18.2	48	0.8	38.2	20.4	37	1	332.2	18.7	40
2019-06-10	09:00:00	0.9	341.8	21.5	44	0.7	45.8	23.1	34	0.7	340.5	22.2	36
2019-06-10	10:00:00	1.1	288.7	25.3	36	0.8	140	26	29	0.7	61.4	26.1	31
2019-06-10	11:00:00	1.8	265.3	27.1	32	1.2	237.3	27.7	26	1	137.7	27.6	27
2019-06-10	12:00:00	2.2	267.1	28.5	27	1.1	218.6	28.8	22	1.1	230	29.2	22
2019-06-10	13:00:00	1.6	223.1	29.8	24	1.1	359.9	29.7	20	1	55.3	29.7	21
2019-06-10	14:00:00	2	271.9	30.3	23	1.4	38.7	30.2	19	1.3	97.6	30.6	18
2019-06-10	15:00:00	2	277.3	31.1	23	1.3	204.8	31.5	18	1.2	119.8	31.6	19
2019-06-10	16:00:00	2	250.2	31.6	22	—	339.9	31.4	18	1.5	128.9	31.7	19
2019-06-10	17:00:00	1.3	142.9	32.3	21	1	231.5	31.8	18	1.2	48.8	31.8	19
2019-06-10	18:00:00	1.5	148.9	32.3	22	1.2	119.1	31.8	18	1	79.4	32.1	19
2019-06-10	19:00:00	1.3	216.4	32.3	22	1.4	176.5	31.5	18	0.8	147.8	32.2	19
2019-06-10	20:00:00	1.4	214.3	31.1	23	1.7	177.9	30.4	21	1.2	118.2	30.6	22
2019-06-10	21:00:00	1.1	189.4	29.4	25	1.4	152.2	29.1	22	1	108.3	29.3	23
2019-06-10	22:00:00	0.9	195.5	27.8	27	1.9	167	28.1	22	1	116.4	28	24
2019-06-10	23:00:00	0.7	190.8	26.6	28	1.6	172.4	27.1	23	0.8	106.6	26.7	26
2019-06-11	00:00:00	1	207.5	25.9	29	1.2	166.2	26.1	25	0.8	111.4	26	26
2019-06-11	01:00:00	0.8	204.9	25.3	31	1	168.7	25.4	27	0.8	104.3	25.4	28
2019-06-11	02:00:00	0.5	175.7	24.4	34	0.9	176.7	24.5	30	1	103.5	24.8	31
2019-06-11	03:00:00	0.7	192.2	24	36	1	160.6	23.9	33	0.8	114.1	24.1	33
2019-06-11	04:00:00	1.2	208.2	23.7	39	2	168.2	23.5	36	1.1	105.4	23.6	36
2019-06-11	05:00:00	1.4	213.5	23.5	43	1.5	163.1	23.1	40	0.9	116.4	23.1	41
2019-06-11	06:00:00	0.9	202.7	22.8	46	1.8	167	22.8	43	0.9	124.6	22.8	44
2019-06-11	07:00:00	2.4	224.1	23	48	2.2	165.6	22.8	44	1	99.5	23	45
2019-06-11	08:00:00	2.8	223.7	23.9	48	2.2	169.2	23.2	45	1.4	122.4	24	44
2019-06-11	09:00:00	3	222.5	24.9	47	2.4	194.8	24.6	43	1.1	156.2	25.6	42
2019-06-11	10:00:00	2.7	228.6	26.4	44	2.4	202.7	25.9	42	1.3	127	26.9	40
2019-06-11	11:00:00	1.9	228.7	28.1	42	2	192.2	27.7	38	1.5	116.7	28.2	38
2019-06-11	12:00:00	2.1	231.3	29.8	38	2.1	195.4	29.2	34	1.3	141.9	30	34
2019-06-11	13:00:00	1.7	231.8	30.6	36	1.7	175.8	30.1	33	1.2	140.3	30.8	32
2019-06-11	14:00:00	1.9	216.8	31.1	35	2.3	191.8	30.6	31	1.2	113.1	31.2	32
2019-06-11	15:00:00	3.8	260.7	29.7	36	5.2	237.1	28.6	34	3	251.9	29.7	33
2019-06-11	16:00:00	4.7	264.6	25.7	48	5.6	240.7	22.7	53	4.2	256.3	25.4	47
2019-06-11	17:00:00	3.9	244.9	26.4	43	5.1	221.4	25.8	40	2.1	237.2	26.6	40
2019-06-11	18:00:00	3.2	254.6	26.7	41	3.5	228.1	26.1	39	1.9	249.5	26.8	38
2019-06-11	19:00:00	1.7	218.6	26.6	41	1.2	174.3	26	39	1.3	118.4	26.3	40
2019-06-11	20:00:00	3.8	213.6	25.1	50	4.2	173.1	24	51	2	122.2	24.8	48
2019-06-11	21:00:00	2.9	210	22.7	65	3.1	152.9	21.9	64	2.3	105.7	22.4	63
2019-06-11	22:00:00	1.7	207.6	21.8	68	2.2	168.1	21.2	66	1.4	119.8	21.6	65
2019-06-11	23:00:00	1.6	227.2	21.7	66	1.8	183.4	21.2	65	0.9	144.2	21.7	63
2019-06-12	00:00:00	1.1	222.1	21.5	67	1.2	167.7	21.1	65	0.9	105.9	21.5	63
2019-06-12	01:00:00	0.8	229.1	21.2	68	0.5	232.6	20.9	66	0.6	87.9	21.3	64
2019-06-12	02:00:00	1.1	282.6	20.9	69	1.1	234	20.2	70	0.9	276.6	20.8	66
2019-06-12	03:00:00	1.2	252.2	20.7	71	1.2	211.9	20.3	69	0.4	236.1	20.8	67
2019-06-12	04:00:00	1	216.4	20.5	73	0.8	224.5	19.9	70	0.4	264.7	20.5	69
2019-06-12	05:00:00	0.7	213.8	20.4	73	0.7	226.7	19.7	72	0.5	155.6	20.4	69
2019-06-12	06:00:00	0.7	198.9	20.1	72	0.5	169.2	19.8	72	0.4	100.2	20.1	70
2019-06-12	07:00:00	0.7	90.7	19.9	74	0.5	252	19.9	73	0.5	78.6	20.1	70
2019-06-12	08:00:00	1.3	75.7	18.6	90	1.2	60.3	19	80	1.1	16.5	18.6	82
2019-06-12	09:00:00	2.2	106.2	18.7	91	1.7	66.5	19.1	81	1.9	55.4	19.1	82
2019-06-12	10:00:00	2.9	101.9	20.1	84	1.8	66.9	20.8	74	2	44.5	20.2	77
2019-06-12	11:00:00	2.6	119.9	21	79	1.8	62.3	21.3	71	1.9	52	21.1	72
2019-06-12	12:00:00	2.4	18.4	17.4	93	3	9.8	16.7	91	2.8	321.2	17.2	89
2019-06-12	13:00:00	2.2	87	15.7	100	2.2	50.5	15	100	1.7	32.1	15.8	95
2019-06-12	14:00:00	2.1	113.3	16.1	100	2	69.8	15.4	100	1.6	61.5	16.2	92
2019-06-12	15:00:00	1.8	162.1	15.9	100	1.2	141.3	15.3	98	1.2	91.8	15.8	94
2019-06-12	16:00:00	1.9	220	16.1	100	2.5	173.6	15.8	96	1.2	129.1	15.9	96
2019-06-12	17:00:00	2.4	226.5	16.5	100	2.3	186.8	16.4	94	1.2	135.9	16.4	93
2019-06-12	18:00:00	2.6	219.5	16.9	100	2.2	196.5	16.8	94	1.1	132.4	16.9	93
2019-06-12	19:00:00	1.8	222.2	17.2	98	1.5	180.6	17.2	90	0.9	154	17.4	89
2019-06-12	20:00:00	0.8	177.6	17.3	94	0.6	79.9	17.5	86	0.6	106.9	17.4	87
2019-06-12	21:00:00	1	113.9	17.4	95	0.9	80.3	17.4	87	0.7	49.9	17.5	86
2019-06-12	22:00:00	1	210.8	17.6	96	1	155.5	17.5	87	0.8	113.7	17.7	88
2019-06-12	23:00:00	1.2	226.2	17.7	98	1.2	167.6	17.5	91	0.8	128.7	17.6	91
2019-06-13	00:00:00	1.1	318.2	17.5	99	1.1	290	17.3	93	0.9	286.3	17.5	92
2019-06-13	01:00:00	0.5	32.8	17.4	100	0.7	204.3	17.4	92	0.5	14	17.4	92
2019-06-13	02:00:00	0.8	352.4	17.3	100	0.7	225.7	17.2	92	0.6	272.8	17.3	93
2019-06-13	03:00:00	1.4	4.7	16.6	100	0.7	355.5	16.9	93	0.9	320.6	16.8	95
2019-06-13	04:00:00	0.7	0.8	16.2	100	1	31.3	16.7	95	0.8	332.4	16.2	98
2019-06-13	05:00:00	0.6	336.6	16	100	0.9	82.4	16.5	96	0.5	58.2	16.3	97
2019-06-13	06:00:00	0.6	222.8	15.9	100	0.6	152.7	16.3	94	0.5	69.9	16.4	94
2019-06-13	07:00:00	0.8	356	16.4	100	0.4	308.5	17	92	0.8	323	16.5	92
2019-06-13	08:00:00	0.6	341.8	18.2	92	0.5	58	19.3	82	0.6	359.6	18.2	85
2019-06-13	09:00:00	1.1	346.4	19.6	86	1	48.3	20.1	75	0.8	356.4	19.8	77
2019-06-13	10:00:00	1.1	9.8	21.2	78	1.1	161.6	21.8	65	0.9	28.2	21.5	70
2019-06-13	11:00:00	1.8	184.5	23.2	63	1.5	192.6	22.9	61	1.2	115.8	23	61
2019-06-13	12:00:00	1.5	219.9	24.5	57	1.2	106.3	24.1	56	1.2	105.9	24.2	54
2019-06-13	13:00:00	1.5	229.5	25	55	1.1	51.2	24.7	52	1.3	62.9	25.1	50
2019-06-13	14:00:00	1.3	189.3	26.2	51	1	62.1	26.3	46	1.3	340.3	25.7	48
2019-06-13	15:00:00	1.5	237.3	26.7	48	1.2	193.8	26.4	45	1.2	85.4	26.2	46
2019-06-13	16:00:00	2	231.5	27.4	47	1.3	207.6	27.1	43	1	120.3	27	44
2019-06-13	17:00:00	1.6	254.6	27.7	46	1.4	102.7	27.5	43	1.1	121.5	27.4	42
2019-06-13	18:00:00	1.3	198.7	27.7	46	1.1	166	27.2	43	1	97.4	27.4	43
2019-06-13	19:00:00	1	161.5	27.7	46	1	154.1	27.2	43	0.8	165.4	27.4	44
2019-06-13	20:00:00	1.1	206.7	26.8	49	1.1	182	26.2	46	0.9	109.1	26.4	47
2019-06-13	21:00:00	0.8	203.9	25.5	54	1.2	175.7	25.3	49	0.7	108	25.3	50
2019-06-13	22:00:00	0.4	169.7	24.4	61	0.9	181.4	24.3	54	0.6	114.2	24.5	55
2019-06-13	23:00:00	0.4	163.4	23.3	66	0.3	240	23.2	62	0.4	127.6	23.6	59
2019-06-14	00:00:00	0.4	244.1	22.2	72	0.4	182.7	21.8	70	0.4	107.2	22.8	64
2019-06-14	01:00:00	0.5	279.4	21.3	75	0.6	213.4	20.9	74	0.3	171.3	21.7	70
2019-06-14	02:00:00	0.8	12	20.2	84	0.4	231	20.2	78	0.1	211.1	21.2	72
2019-06-14	03:00:00	0.8	19.6	19.2	89	0.2	229.9	19.6	77	0.3	251.7	20.5	75
2019-06-14	04:00:00	0.6	9.8	18.3	93	0.3	315.2	19	80	0.4	299.3	19.2	80
2019-06-14	05:00:00	0.7	5.9	17.6	95	0.3	346.7	18.5	83	0.7	295.1	18	85
2019-06-14	06:00:00	0.6	6.6	17.2	97	0.3	330.6	18.2	84	0.6	284.8	17.3	88
2019-06-14	07:00:00	0.6	353.9	18.3	92	0.5	322.2	18.9	82	0.6	349.9	18.4	84
2019-06-14	08:00:00	0.6	293.7	21	80	0.4	155.7	21.9	69	0.3	145.3	21.5	70
2019-06-14	09:00:00	2	236	23.4	65	1.6	203.1	23.1	60	1.2	110.7	23.7	58
2019-06-14	10:00:00	1.7	223.4	25.1	59	1.4	185.4	24.5	55	1.2	106.2	24.9	55
2019-06-14	11:00:00	1.8	225.3	26.8	50	1.3	179.2	26.3	47	1.3	101	26.4	48
2019-06-14	12:00:00	1.8	193.1	27.9	47	1.5	188	27.4	43	1.4	132.7	27.7	44
2019-06-14	13:00:00	2.2	198.3	28.6	45	2	161.9	28.2	40	1.6	124	28.6	41
2019-06-14	14:00:00	2.8	227.7	29	43	2.4	179.4	28.6	38	1.7	99.4	28.9	40
2019-06-14	15:00:00	2.5	212.2	29.9	40	2.4	193.5	28.9	37	1.6	110	29.5	37
2019-06-14	16:00:00	2.1	223.2	29.9	37	2	155.6	29.1	35	1.6	121.2	29.6	35
2019-06-14	17:00:00	1.9	198	29.9	37	2	184.8	29.2	33	1.4	109.3	29.4	35
2019-06-14	18:00:00	1.6	173.2	29.7	37	1.3	129.8	29.3	33	1.5	94.9	29.3	35
2019-06-14	19:00:00	1.4	185.1	29.4	38	1.2	131.5	29.1	34	1.2	92.5	29.1	36
2019-06-14	20:00:00	1.3	206.1	28.7	41	1.4	173.7	28.3	37	0.9	106.7	28.4	38
2019-06-14	21:00:00	1.4	214.8	27.9	43	0.9	190.9	27.4	39	0.6	127.2	27.6	39
2019-06-14	22:00:00	0.3	184.8	26.6	48	1.1	174.8	26.6	42	0.6	119.5	26.7	43
2019-06-14	23:00:00	0.5	210.6	25.8	52	0.8	180.4	25.7	46	0.4	132.4	25.9	46
2019-06-15	00:00:00	0.3	158.3	25.1	52	0.3	195	24.7	53	0.5	118	25.2	48
2019-06-15	01:00:00	0.4	205.1	24.3	56	0.9	187.4	23.9	56	0.5	136.2	24.7	50
2019-06-15	02:00:00	1.7	247.1	24.2	57	1.8	219.6	23.7	56	0.8	225.6	24.1	55
2019-06-15	03:00:00	1.7	274.9	23.5	60	1.6	246.2	23.1	58	1.1	259.9	23.2	58
2019-06-15	04:00:00	1.1	333.9	22	69	0.7	327.1	21.9	65	0.9	275.7	21.8	65
2019-06-15	05:00:00	1.2	302.6	21.3	73	1	241.9	21.3	68	1.1	263	21.2	69
2019-06-15	06:00:00	1.4	277.6	20.7	76	1.5	231.4	20.4	72	1	255.7	20.6	72
2019-06-15	07:00:00	1.8	252.6	20.2	79	1.9	227.8	20	73	1	256.8	20.1	74
2019-06-15	08:00:00	1.7	282.1	20.3	80	1.9	231.8	20.1	74	1.3	258.5	20.3	74
2019-06-15	09:00:00	1.6	278.8	21.4	77	1.6	227.2	21.1	72	1.1	253	21.4	72
2019-06-15	10:00:00	1.2	279.3	23.6	69	1.3	287.6	23.2	65	1.3	294.2	23.3	65
2019-06-15	11:00:00	2.1	250.7	24.9	64	2.1	212.9	24.4	61	1.2	243.5	25.2	59
2019-06-15	12:00:00	2.9	257.9	25.5	62	2.6	224.6	25.4	57	1.5	234.7	26.2	55
2019-06-15	13:00:00	3.4	254.2	25.6	60	3.6	228.7	25	56	2.2	245.5	26.1	54
2019-06-15	14:00:00	2.7	274.5	24.1	67	1.8	240	24.1	62	2.3	252.4	24.2	62
2019-06-15	15:00:00	2.8	261.1	24.7	63	2.9	227.4	24.7	58	2	252.9	25	58
2019-06-15	16:00:00	2.6	254.6	25.5	60	2.9	230.8	25.5	55	1.4	254.7	26	54
2019-06-15	17:00:00	2.6	276.2	25.9	57	2.3	227	25.8	53	2.3	257.7	26.1	52
2019-06-15	18:00:00	2	297.3	25.3	57	1.8	243.2	25.2	53	1.8	262.2	25.3	53
2019-06-15	19:00:00	3.1	350.1	23.4	65	2.8	310.3	23.4	61	2.9	298.4	23.2	62
2019-06-15	20:00:00	2.8	10.2	20.4	80	2.7	335.8	20.5	74	2.7	310.3	20.4	75
2019-06-15	21:00:00	1.6	0.2	19	90	1.4	354.4	19.2	81	1.3	316.4	18.9	84
2019-06-15	22:00:00	1.3	350.3	19.1	88	0.6	26.7	19.5	80	0.9	353	19.1	82
2019-06-15	23:00:00	1.5	352.4	19.2	88	1.2	287.1	19.3	82	1.1	300.9	19.2	81
2019-06-16	00:00:00	1.4	330.1	19.3	89	1.1	276.2	19.1	83	1.1	271.1	19.2	84
2019-06-16	01:00:00	1.2	355.2	19.2	88	0.8	294.6	19.1	85	1	291.4	19.2	81
2019-06-16	02:00:00	0.9	2.5	19.1	84	0.8	317.3	18.9	87	1	323.3	19.1	78
2019-06-16	03:00:00	0.8	3.6	18.8	85	0.6	248.1	18.8	88	0.5	308.8	18.8	83
2019-06-16	04:00:00	0.7	22.8	18.6	85	0.6	291.8	18.6	88	0.4	351.6	18.7	81
2019-06-16	05:00:00	1.1	2	18	90	0.9	285.3	17.9	90	0.8	327.9	18.2	83
2019-06-16	06:00:00	1	343.7	17.2	96	0.5	280.8	17.5	91	0.8	322.6	17.4	90
2019-06-16	07:00:00	0.7	352.6	17.9	94	0.3	233	18.7	86	0.5	330	17.8	88
2019-06-16	08:00:00	0.7	332.5	19.9	83	0.7	165	20.3	77	0.6	312.7	19.3	79
2019-06-16	09:00:00	1.2	345.9	20.8	78	1	264.7	20.6	74	1	307.7	20.7	73
2019-06-16	10:00:00	1.6	25.9	21.8	72	1.1	356.6	22.1	65	1.4	338.7	21.6	68
2019-06-16	11:00:00	1.4	16.9	23.3	58	1	77.3	23.6	56	1.2	28.8	23.4	53
2019-06-16	12:00:00	1.4	257.8	24.8	50	1.3	90.8	24.8	45	1	9	24.7	45
2019-06-16	13:00:00	1.6	162.4	25.8	47	1.3	209.6	25.5	42	1.1	110.7	25.8	43
2019-06-16	14:00:00	1.8	234.2	26.8	44	1.4	194.7	26.3	39	1	180.1	27	40
2019-06-16	15:00:00	2	230.9	27.5	42	1.4	201.3	27.4	37	1.2	95	27.4	38
2019-06-16	16:00:00	1.8	217.4	28.2	38	1.3	138.4	27.6	36	1.3	92.7	27.9	36
2019-06-16	17:00:00	1.9	246.7	28.9	36	1.4	183.3	28.5	33	1.3	97.8	28.4	34
2019-06-16	18:00:00	1.7	216.4	29.3	35	1.5	161	28.2	33	1.1	151.3	29.1	32
2019-06-16	19:00:00	1.7	254.5	28.7	35	1.1	158.6	28.6	31	0.9	121.5	28.8	32
2019-06-16	20:00:00	1.6	230.4	28.1	36	1.3	173.5	27.6	33	0.8	110.5	28.1	33
2019-06-16	21:00:00	1.4	213.6	27.2	40	1.2	166	26.6	38	0.9	110.7	26.8	37
2019-06-16	22:00:00	0.8	144.9	25.6	49	1	161	25.6	46	0.8	112.2	25.7	46
2019-06-16	23:00:00	1.5	121.2	24.4	54	0.6	166.9	24.8	50	0.9	65.9	24.8	50
2019-06-17	00:00:00	1.9	134.1	22.7	55	1.2	80.8	23	53	1.2	75.9	22.7	52
2019-06-17	01:00:00	1	177.4	21.8	57	0.9	97.4	22.1	53	1.1	87.7	22.3	53
2019-06-17	02:00:00	1	210.4	21.6	58	0.9	127.7	21.6	54	0.9	103.4	21.9	54
2019-06-17	03:00:00	0.6	200.1	21.4	58	1.2	169.5	21.4	54	0.6	116.3	21.6	54
2019-06-17	04:00:00	1.6	224	21.2	60	0.8	174	21	56	0.6	113.3	21.1	56
2019-06-17	05:00:00	1.6	221.7	20.8	63	0.8	195.9	20.5	60	0.4	144.9	20.8	59
2019-06-17	06:00:00	0.6	193.2	20.4	66	0.8	176.4	20.2	63	0.6	126.4	20.3	63
2019-06-17	07:00:00	1.6	221.6	21	66	1.4	180.5	20.7	62	1	96.6	20.8	63
2019-06-17	08:00:00	2.5	223.3	22.1	63	2.6	181.3	21.5	60	1.2	116.9	22.3	58
2019-06-17	09:00:00	2.4	220.1	23.3	58	2.4	195	23	54	1.1	144.9	24	52
2019-06-17	10:00:00	2.5	234.4	24.9	54	2.4	199.4	24.3	51	1.2	176	25.3	49
2019-06-17	11:00:00	3.1	225.6	26.3	51	2.6	199.2	25.9	48	1.3	186.2	27.1	45
2019-06-17	12:00:00	2.4	225	27.8	47	2.4	168.7	27.2	44	1.6	125.9	27.9	43
2019-06-17	13:00:00	2.7	221	29.3	43	2.7	169.9	28.4	40	1.4	125.9	29.4	39
2019-06-17	14:00:00	2.8	219.8	30	39	2.6	160.8	29.2	36	1.7	110.7	30.2	36
2019-06-17	15:00:00	3.1	225.7	30.5	36	2.7	179.4	29.9	34	1.9	122	30.5	34
2019-06-17	16:00:00	3.5	223.9	30.9	36	3.5	201.5	30.3	32	2	126.6	31	32
2019-06-17	17:00:00	4.1	224.5	30.5	36	3.4	185.6	29.9	34	1.8	126.7	30.8	33
2019-06-17	18:00:00	3.7	217.4	30.4	35	2.7	181.4	29.8	32	1.6	141.6	30.5	32
2019-06-17	19:00:00	2.8	213.5	30	35	2.9	176	29.5	32	1.5	122.1	29.9	32
2019-06-17	20:00:00	2.3	143.1	28.4	40	1.5	131.1	28.7	35	1.9	91.5	28.8	36
2019-06-17	21:00:00	2.3	209.3	27.8	42	2.3	165.4	27.3	40	1.5	113.4	27.5	40
2019-06-17	22:00:00	2.3	216.8	26.7	46	3.4	168.6	26.5	42	1.4	128.3	26.4	43
2019-06-17	23:00:00	2.6	221.1	25.4	49	1.8	188.5	25.2	45	0.8	114.4	25.3	45
2019-06-18	00:00:00	2.1	229.7	24.8	50	2	213.8	24.3	47	0.9	199.1	24.9	46
2019-06-18	01:00:00	1.8	227.6	24.3	52	1.9	204	23.6	49	0.6	142.5	24.2	48
2019-06-18	02:00:00	1.1	210.3	23.4	54	1.2	203.6	23.1	51	0.5	113.2	23.2	52
2019-06-18	03:00:00	0.4	176.6	22.5	57	0.8	152.6	22.2	54	0.3	116.2	22.8	53
2019-06-18	04:00:00	0.7	216.3	21.7	61	0.8	229.5	21.1	59	0.3	249.2	21.9	57
2019-06-18	05:00:00	0.6	201.1	21.1	63	0.5	195.9	20.3	65	0.3	131.1	21.3	59
2019-06-18	06:00:00	0.6	253.4	20.6	65	0.7	233.9	19.8	66	0.3	258.1	20.7	62
2019-06-18	07:00:00	2	225.3	21	66	1	215	20.5	63	0.5	161.3	21.1	62
2019-06-18	08:00:00	2.1	235.1	21.8	65	1.1	194.2	21.8	59	1.2	99.6	22	60
2019-06-18	09:00:00	1.7	225.5	23.5	61	1.8	208.6	23	58	1.3	131.2	23.5	56
2019-06-18	10:00:00	1.7	225	25.5	56	2	199.7	24.6	54	1.1	166.8	25.6	51
2019-06-18	11:00:00	1.8	236.4	27.2	51	1.7	188.9	26.6	48	1	179.1	27.7	45
2019-06-18	12:00:00	2.2	229	29	45	2.3	218.2	28.6	40	1.5	227.1	29.4	38
2019-06-18	13:00:00	2.7	235.1	30.2	40	2.2	194.9	29.6	38	1.4	200.5	30.6	35
2019-06-18	14:00:00	2.3	225.9	31	39	2.2	181.4	30.2	35	1.3	113.3	31.1	36
2019-06-18	15:00:00	2.2	240	32.1	30	2	194.4	31.7	26	1.4	114	32.2	27
2019-06-18	16:00:00	2.3	227	32.9	29	1.9	190.6	32.3	26	1.3	134.2	33.2	25
2019-06-18	17:00:00	2.4	228.8	32.5	28	2.7	190.5	31.8	27	1.4	120.3	32.5	25
2019-06-18	18:00:00	3.1	223.4	31.5	32	2.2	181.6	30.9	30	1.2	134.5	31.5	29
2019-06-18	19:00:00	2.6	223.5	30.9	34	2	194.7	30.4	31	0.9	138.1	30.9	31
2019-06-18	20:00:00	2.4	224.5	30.3	34	1.7	199	29.8	31	0.7	180.6	30.3	31
2019-06-18	21:00:00	2.2	225.6	29.6	36	1.9	201.3	29.1	33	0.9	192.9	29.5	32
2019-06-18	22:00:00	2.2	232.9	28.9	36	1.5	214.7	28.1	34	0.6	227.3	28.6	34
2019-06-18	23:00:00	0.7	221.6	28.2	38	0.6	188.3	27.8	34	0.4	248.1	27.9	36
2019-06-19	00:00:00	0.4	258.3	27.2	43	0.5	235.5	26.8	40	0.2	248.1	27.5	37
2019-06-19	01:00:00	0.6	350.3	26.1	44	0.5	198.1	25.8	44	0.4	220.7	26.9	39
2019-06-19	02:00:00	0.5	324.4	25.8	48	0.5	210.2	25.4	46	0.4	240.1	26.3	42
2019-06-19	03:00:00	0.5	294.7	25.2	52	0.6	231.2	24.9	51	0.3	135.4	25.9	46
2019-06-19	04:00:00	0.6	340.6	24.8	54	1	225.5	24.3	51	0.6	247.1	25.1	48
2019-06-19	05:00:00	0.9	304.1	24.2	56	0.8	154.4	24.1	51	0.5	72.1	24.7	51
2019-06-19	06:00:00	0.6	117.4	24.4	52	1.7	173.9	23.9	50	0.7	64.2	24.5	48
2019-06-19	07:00:00	0.9	354.1	24.2	56	0.8	54.2	24.5	48	0.7	312	24.5	51
2019-06-19	08:00:00	0.8	72.6	24.4	56	0.7	137.5	24.9	48	0.7	56.5	24.7	52
2019-06-19	09:00:00	1.4	227.5	24.7	55	1.2	201.4	24	54	0.7	129	24.9	50
2019-06-19	10:00:00	1.2	231.5	24.9	55	1.2	216.1	24.6	53	0.7	186.2	25	51
2019-06-19	11:00:00	1.5	241	25.1	54	1.1	69.5	24.8	52	0.8	305.9	25.4	50
2019-06-19	12:00:00	1.4	260.1	25.8	55	2.2	226.3	25	54	1.4	271.6	25.6	51
2019-06-19	13:00:00	1.4	299.7	25.2	58	1	289	25.3	53	1.2	282.2	25.2	54
2019-06-19	14:00:00	1.1	47.6	26.8	50	1.2	46.7	26.7	46	1	339.8	26.8	44
2019-06-19	15:00:00	2.2	69.3	27.9	46	1.7	62.7	27.9	41	1.8	5.7	27.9	42
2019-06-19	16:00:00	1.3	78.8	29	43	1	54.4	29.2	37	1.4	12.1	28.5	41
2019-06-19	17:00:00	1.6	136.8	29.5	39	1.2	123.8	29.2	34	1.4	74.1	29.1	36
2019-06-19	18:00:00	1.8	135.3	29.2	38	0.9	92.6	28.8	35	1.3	81.8	29	35
2019-06-19	19:00:00	1.7	121.5	28.6	40	1.2	70.2	28.3	39	0.9	70.1	28.5	38
2019-06-19	20:00:00	1.6	117	28.1	42	1.1	77	27.6	41	0.9	61.4	28	39
2019-06-19	21:00:00	1.4	123.9	27.7	44	0.9	81.8	27.3	41	0.5	64.9	27.6	41
2019-06-19	22:00:00	2.2	197.4	26.7	46	1.7	163.6	26.3	44	0.8	136.4	26.4	46
2019-06-19	23:00:00	1.2	338.9	24.3	59	2	291.7	23.6	60	1.1	261.2	24.1	57
2019-06-20	00:00:00	1	40.3	24.8	57	1.1	55.3	23.6	59	1	29.4	24.6	53
2019-06-20	01:00:00	0.9	69.5	24.6	55	0.6	82.2	24.2	56	1	22.3	24.4	54
2019-06-20	02:00:00	0.9	123.7	24.3	54	0.7	129.4	24	54	0.7	59.5	24.4	51
2019-06-20	03:00:00	1	92	23.8	54	0.5	81.6	23.8	54	0.9	52.6	23.9	51
2019-06-20	04:00:00	0.8	111.2	23.1	58	0.7	71.7	23.2	54	0.6	74.5	23.3	54
2019-06-20	05:00:00	1	138.5	22.6	61	0.6	84.2	22.8	55	0.9	82.5	22.9	56
2019-06-20	06:00:00	1.2	141.6	22.2	62	0.6	70.5	22.4	58	1	84.3	22.6	58
2019-06-20	07:00:00	0.9	194.8	22.6	62	1.1	171.9	22.3	59	1	99.5	22.6	58
2019-06-20	08:00:00	1	212.9	23	63	1	175.7	22.6	60	0.9	99.1	22.8	60
2019-06-20	09:00:00	1.1	161.8	23.7	61	0.8	118	23.4	58	0.9	111.9	23.5	58
2019-06-20	10:00:00	1.7	193.7	24.6	59	1.5	162.8	24.4	56	1	116.7	24.7	55
2019-06-20	11:00:00	2.3	196.6	26.1	53	2.1	167.4	25.5	50	1.5	119.6	26.1	50
2019-06-20	12:00:00	2.9	223	27.5	46	2.3	172.9	26.9	43	1.6	112.4	27.5	43
2019-06-20	13:00:00	2.6	213.7	28.4	42	2.6	180.5	27.6	40	1.9	111.2	28.2	40
2019-06-20	14:00:00	2.6	215.9	29.2	37	2.7	166.9	28.4	34	1.8	112	29.1	34
2019-06-20	15:00:00	1.9	149.7	29.1	38	1.7	119.2	28.6	34	1.9	100.6	28.9	35
2019-06-20	16:00:00	1.5	164.5	29	40	1.2	125.6	28.8	36	1.6	93.8	28.7	37
2019-06-20	17:00:00	2.7	227.3	28.5	42	2.5	186.7	27.8	41	1.2	117.1	28.5	39
2019-06-20	18:00:00	3.3	228.1	27.9	48	2.4	187.7	27.3	45	1.3	149.2	27.9	44
2019-06-20	19:00:00	3	231.7	27.1	53	2.2	201	26.6	50	1.2	170.6	27.2	48
2019-06-20	20:00:00	3.2	230	26.6	55	2.6	214.4	26.2	51	1	203.7	26.6	50
2019-06-20	21:00:00	2.5	242.6	26	56	2.2	212.5	25.5	52	1	230.1	25.8	52
2019-06-20	22:00:00	3	240.7	25.4	57	3.1	223.9	24.8	54	1.2	234.6	25.2	53
2019-06-20	23:00:00	1.5	289.3	23.1	68	1.7	222.7	22.9	64	1.1	265.7	22.8	65
2019-06-21	00:00:00	1.2	359.7	22.6	71	0.9	306.2	22.5	65	0.8	322.5	22.5	67
2019-06-21	01:00:00	1	3.9	22.1	74	0.5	296.9	22.5	67	0.7	313.9	22	69
2019-06-21	02:00:00	1	349.3	22	74	0.9	218.3	22.2	67	0.3	320.9	22.2	69
2019-06-21	03:00:00	0.6	330.4	22	73	1	214.1	22	68	0.3	146.1	22.4	67
2019-06-21	04:00:00	0.6	305	22	74	1.4	210.9	21.8	70	0.6	203.3	22.2	68
2019-06-21	05:00:00	0.9	285.8	21.8	74	1.2	224.8	21.5	70	0.4	244.6	21.9	69
2019-06-21	06:00:00	1	339.2	21.3	80	1.4	216.4	21.1	72	0.6	293.3	21.5	72
2019-06-21	07:00:00	1.6	236.5	21.2	79	1.8	203	20.8	73	0.6	205.7	21.4	72
2019-06-21	08:00:00	2	233.4	21.5	77	1.4	207.5	21.2	73	1	123	21.6	71
2019-06-21	09:00:00	1.4	238	21.8	76	1.5	224.4	21.4	73	0.8	241.4	22	70
2019-06-21	10:00:00	1.4	282.1	21.9	77	1.3	223.9	22	70	0.8	240	22.3	70
2019-06-21	11:00:00	1.2	244.5	23	72	1.5	208.1	22.6	69	0.8	241.2	23.2	68
2019-06-21	12:00:00	1.1	240.2	23.9	69	0.8	196	23.7	63	0.7	187.3	24.2	64
2019-06-21	13:00:00	1	143.1	24.3	65	0.9	57	24.2	60	0.8	105	24.3	61
2019-06-21	14:00:00	1.6	249.3	24.9	64	0.9	154	24.9	58	0.9	115	25.1	58
2019-06-21	15:00:00	2.8	233.7	24.8	63	2.3	213.7	24.4	59	1.1	170	25	58
2019-06-21	16:00:00	3.3	241.5	24	62	3.1	216.3	23.2	61	1.5	223.9	24.2	56
2019-06-21	17:00:00	3.6	234.9	23.8	62	2.6	215.1	23.4	60	1.2	200.5	24	56
2019-06-21	18:00:00	2.2	253.7	23.2	65	2.4	208.2	22.8	62	1	215.2	23.3	60
2019-06-21	19:00:00	2	228.5	23.3	63	1.5	216.9	22.7	63	0.8	197.4	23.4	59
2019-06-21	20:00:00	1.8	225.4	23.2	64	1.6	209.7	22.7	61	0.6	212.3	23.2	60
2019-06-21	21:00:00	2.1	219.5	23.1	64	1.4	179.6	22.5	63	0.9	120.1	23	61
2019-06-21	22:00:00	2.9	222.2	22.7	69	1.6	203.1	22.3	65	1.1	150.3	22.6	64
2019-06-21	23:00:00	2.8	220	22.4	70	1.7	196.7	22	67	1.3	147.7	22.3	66
2019-06-22	00:00:00	3	222.4	21.9	74	2.1	197.2	21.5	71	1.3	147.9	21.8	69
2019-06-22	01:00:00	2.2	219.3	21.4	76	1.3	175.2	21	73	0.9	119.5	21.3	71
2019-06-22	02:00:00	0.9	209.9	20.9	76	0.7	157.7	20.8	72	0.7	102.5	21	71
2019-06-22	03:00:00	0.8	120.7	20.9	73	0.6	58.4	20.9	69	0.5	80.4	21.1	68
2019-06-22	04:00:00	1.3	201.4	20.8	74	1.3	151.4	20.8	68	0.8	106.2	21	68
2019-06-22	05:00:00	0.8	209.6	20.6	71	1	141.6	20.5	67	0.7	106.8	20.7	67
2019-06-22	06:00:00	0.7	200.3	20.4	69	0.6	162.8	20.4	65	0.4	126.7	20.8	64
2019-06-22	07:00:00	0.9	341.7	20.4	69	0.6	26.9	20.7	63	0.6	14.2	20.8	63
2019-06-22	08:00:00	1	8.3	21	70	0.7	47.1	21.5	62	0.7	14.9	21.2	64
2019-06-22	09:00:00	1.4	141.9	22.3	70	1	66.5	22.4	64	1	65.8	22.4	64
2019-06-22	10:00:00	1.4	151.8	24.2	62	1.2	148.9	24.2	58	1.3	94.2	24.2	58
2019-06-22	11:00:00	2	207	25.6	54	2.2	202	24.9	51	1.2	132.7	25.5	50
2019-06-22	12:00:00	2.8	232.5	26	50	2.3	187.3	25.5	48	1.2	176.6	26.3	45
2019-06-22	13:00:00	3.8	230.4	26	49	3.2	204.1	25.6	44	1.5	160.3	26.4	43
2019-06-22	14:00:00	4.2	234.1	25.5	51	3.7	206.4	25.3	47	1.2	179.9	26.3	45
2019-06-22	15:00:00	3.9	235.7	25.5	54	3.7	203.4	24.9	52	1.8	189.8	25.9	49
2019-06-22	16:00:00	3.1	221.1	25.4	56	3.2	199.1	24.9	53	1.3	185.9	25.8	50
2019-06-22	17:00:00	2.5	222.1	25.5	54	1.8	167.6	25	51	1.4	113.6	25.5	50
2019-06-22	18:00:00	1.9	221.3	25.3	56	1.5	175.1	24.8	54	1.1	112.2	25.2	52
2019-06-22	19:00:00	1.8	223.8	25	58	2.1	219	25	53	0.7	204.5	25.2	53
2019-06-22	20:00:00	1.7	238	25	56	1.8	213.8	24.8	50	0.8	219.7	25.1	50
2019-06-22	21:00:00	1.7	220.5	24.8	56	1.2	192.4	24.5	52	0.5	193.1	24.8	51
2019-06-22	22:00:00	2	229.7	24.5	57	1.4	195.8	24	55	0.6	159.5	24.5	53
2019-06-22	23:00:00	0.9	211.3	24.1	59	1.1	169.2	23.7	57	0.6	108.6	24.1	56
2019-06-23	00:00:00	1.4	220.6	23.7	63	1.3	172.2	23.1	62	0.7	108.8	23.6	60
2019-06-23	01:00:00	1	210.5	22.7	68	0.8	123.3	22.4	66	0.8	100.2	22.7	65
2019-06-23	02:00:00	0.7	210.2	22.2	68	0.5	183.2	22.1	65	0.4	102.9	22.4	64
2019-06-23	03:00:00	0.6	185.5	21.9	70	0.6	156.8	22	64	0.7	96.4	22	66
2019-06-23	04:00:00	0.7	199.4	21.7	70	0.6	201	21.6	66	0.8	92.2	21.7	66
2019-06-23	05:00:00	0.6	217.6	21.4	72	0.7	176.1	21.2	69	0.8	101.4	21.4	68
2019-06-23	06:00:00	0.9	224.5	21.1	73	0.9	181.8	20.9	70	0.5	117.7	21.2	69
2019-06-23	07:00:00	1.8	224.2	21.4	74	1.5	168.4	21.1	70	0.8	110.6	21.3	70
2019-06-23	08:00:00	1.9	234.9	21.6	74	1.3	202.6	21.3	70	0.8	121.8	21.8	69
2019-06-23	09:00:00	2.8	228.3	22.5	72	1.3	222	22.2	68	1.1	102.8	22.7	66
2019-06-23	10:00:00	2.9	232.1	22.8	72	2.2	211.6	22.6	68	1.2	154.6	23	66
2019-06-23	11:00:00	3.2	219.5	23.5	72	2.6	184.2	23	68	1.4	121.9	23.6	67
2019-06-23	12:00:00	3.3	217.3	24.5	66	3.3	167.8	23.9	63	1.7	113.2	24.4	63
2019-06-23	13:00:00	2.6	221.8	25.2	61	3	181	24.7	59	1.6	111.6	25.2	58
2019-06-23	14:00:00	4.1	232.3	26.7	54	3.5	191.9	26.4	51	1.7	153.4	27.3	48
2019-06-23	15:00:00	4.1	226.5	28.1	50	3.4	184.1	27.6	48	1.9	138.1	28.6	46
2019-06-23	16:00:00	3.7	220.4	28.8	45	3.2	179.6	28.4	41	1.9	115.4	29	41
2019-06-23	17:00:00	4.1	224.7	29.4	40	3.5	185.8	29	36	1.9	149.4	29.5	36
2019-06-23	18:00:00	3.8	221.2	29.5	39	3.2	176.5	29	36	1.9	126.4	29.4	36
2019-06-23	19:00:00	2.7	204.6	27.8	51	2.6	165.4	27.4	47	2.3	110.5	27.6	47
2019-06-23	20:00:00	2.8	214.8	27.2	49	3.2	167.8	26.8	46	1.6	109.9	26.8	46
2019-06-23	21:00:00	1.9	211.5	26.2	54	3.6	165.7	26.1	50	1.5	117.2	26	51
2019-06-23	22:00:00	1.9	214.1	25.2	58	3.1	165.5	25.2	53	1.5	110.2	25.1	54
2019-06-23	23:00:00	1.9	218.1	24.1	63	2.6	168.1	24.2	58	1.4	105.4	24	59
2019-06-24	00:00:00	3.4	216.7	23.5	67	2.7	195.3	23.4	62	1.4	144.6	23.5	62
2019-06-24	01:00:00	2.6	217.5	23.4	69	2.8	194.1	23.2	65	1.5	157	23.3	64
2019-06-24	02:00:00	2.8	219.9	22.9	71	2.4	199.8	22.8	67	1.1	144.7	22.9	67
2019-06-24	03:00:00	2.2	225	22.6	72	2.5	194.4	22.5	68	1.1	154.7	22.7	67
2019-06-24	04:00:00	2.8	219.6	22.3	72	2	194.5	22	68	1	138	22.2	67
2019-06-24	05:00:00	3	218.3	21.9	72	2.1	194	21.6	68	1	146.7	21.8	67
2019-06-24	06:00:00	2.7	222.6	21.5	72	1.9	197.2	21.2	67	1	124.1	21.4	67
2019-06-24	07:00:00	2.8	222.3	21.4	70	2.3	188.5	21.1	66	0.9	108.9	21.4	66
2019-06-24	08:00:00	2.8	223.2	21.8	69	2.4	200.5	21.6	65	1.3	150.1	22	64
2019-06-24	09:00:00	3.6	224.3	22.6	68	3	197.4	22.6	63	1.4	163	23.2	61
2019-06-24	10:00:00	2.8	227.4	23.8	65	2.6	198.7	23.4	61	1.5	150.5	24.1	60
2019-06-24	11:00:00	3.3	232	24.6	64	3.8	215.5	24.4	59	1.4	206.6	25.2	58
2019-06-24	12:00:00	4.2	246.1	24.3	66	4.2	218.5	23.7	62	1.6	236.7	24.9	60
2019-06-24	13:00:00	3.7	235.3	24.8	64	3.4	197.1	24.3	60	1.7	219.2	25.2	58
2019-06-24	14:00:00	3.6	227.2	25.6	59	3.9	209.9	25.1	55	1.6	183.9	26.1	52
2019-06-24	15:00:00	4.3	237.8	25.7	55	4.1	213.7	25.4	50	1.5	193.6	26.3	49
2019-06-24	16:00:00	3.7	239.9	25.6	51	4	226.8	25.3	47	2.1	246.2	26	46
2019-06-24	17:00:00	3.3	241.4	24.7	58	3.7	218.2	24.4	55	1.7	250.9	24.8	54
2019-06-24	18:00:00	3.3	232.6	24.2	61	3.5	209.3	24.1	55	1.3	222.5	24.4	55
2019-06-24	19:00:00	3.6	225.6	23.8	59	2.9	195.8	23.6	56	1.4	144.9	23.9	55
2019-06-24	20:00:00	3.2	219.6	23.4	61	2.1	192.2	22.9	58	1.5	146.7	23.3	57
2019-06-24	21:00:00	2.1	218	22.8	65	2.8	163.6	22.4	63	1.4	113.8	22.6	62
2019-06-24	22:00:00	2.2	218.2	22.1	71	3.3	159	21.7	68	1.3	115.8	21.8	67
2019-06-24	23:00:00	3.1	224.6	21.5	72	2.8	180.2	21.2	68	1.2	146.9	21.4	67
2019-06-25	00:00:00	2.7	222.9	21.1	74	2.6	199.7	20.9	70	1.1	181.4	21.2	68
2019-06-25	01:00:00	3.2	231.3	20.8	73	3.1	206	20.5	68	1	194.1	20.6	67
2019-06-25	02:00:00	1.9	221	20	76	2.1	208.4	19.7	73	1	173.6	20	70
2019-06-25	03:00:00	1.3	222.3	19.1	80	1.2	195.1	19	75	0.9	96.5	19.2	74
2019-06-25	04:00:00	1.1	217	18.6	83	1.1	162.8	18.5	78	1.1	103.7	18.6	78
2019-06-25	05:00:00	0.9	168.8	17.9	88	1.5	167.7	18	82	0.9	123.8	18.1	82
2019-06-25	06:00:00	0.7	153.8	17.8	90	0.8	197.7	17.7	83	0.8	99.9	18	82
2019-06-25	07:00:00	1.2	224	18.1	91	0.9	172.2	17.7	85	0.9	97.1	18	84
2019-06-25	08:00:00	1.2	223.9	18.9	89	1.1	160.9	18.4	84	1.1	103.4	18.6	83
2019-06-25	09:00:00	2	222.7	20.6	81	1.6	171.9	20	78	1.4	101.7	20.4	76
2019-06-25	10:00:00	2.7	224	22.2	69	2.1	183.9	21.8	66	1.3	125.8	22.4	64
2019-06-25	11:00:00	3.1	228	23.4	62	2.6	177.3	22.9	59	1.8	109.3	23.6	57
2019-06-25	12:00:00	3	222.7	25	53	3.1	186.3	24.3	51	1.8	130.5	25	50
2019-06-25	13:00:00	2.4	224.9	26.3	47	2.7	195.9	25.5	46	1.6	126.2	26.2	44
2019-06-25	14:00:00	2.5	233.1	27.1	46	2.8	198	26.3	44	1.5	124.7	27.4	42
2019-06-25	15:00:00	2.5	241.9	28.1	44	2	172.7	27.8	40	1.3	141.1	28.4	39
2019-06-25	16:00:00	1.9	232.8	29	40	2.1	206.5	28.4	38	1.4	120.6	28.8	37
2019-06-25	17:00:00	2.3	244.1	28.5	40	1.8	196.3	28.1	37	1.1	149.7	28.8	36
2019-06-25	18:00:00	1.8	219.6	29	38	2	174.3	28.2	36	1.4	113.8	28.7	35
2019-06-25	19:00:00	1.6	204.6	28.9	39	1.6	172.6	28.2	36	1.2	126.1	28.7	36
2019-06-25	20:00:00	1.3	197.8	28.2	41	1.5	176.8	27.6	38	0.9	121.9	27.8	38
2019-06-25	21:00:00	2.1	222.4	27	44	1.8	170.6	26.6	40	0.8	137.9	26.9	40
2019-06-25	22:00:00	1.6	220.3	26.2	46	1.4	199.1	25.8	43	0.5	143.4	26	43
2019-06-25	23:00:00	1	214.1	25.1	50	1.1	203.6	24.8	47	0.7	135.8	25.1	47
2019-06-26	00:00:00	0.5	196.7	24.1	53	0.8	204.5	23.8	50	0.5	133	24.1	50
2019-06-26	01:00:00	0.6	210.3	23.2	57	0.9	196	22.9	54	0.4	148.1	23.4	53
2019-06-26	02:00:00	0.5	207.4	22.6	60	0.8	193.6	22.1	57	0.4	147.6	22.7	56
2019-06-26	03:00:00	1.4	218.9	22.1	62	1.2	189.8	21.6	59	0.4	142	22	58
2019-06-26	04:00:00	1.6	222.5	21.6	65	0.8	209.3	20.9	62	0.3	217.3	21.4	61
2019-06-26	05:00:00	0.6	209.7	21	67	0.6	172.8	20.7	63	0.6	112.4	21.1	63
2019-06-26	06:00:00	1.1	220.7	20.7	69	1.3	177.6	20.4	65	0.7	117.6	20.7	65
2019-06-26	07:00:00	2.6	224.8	20.8	71	1.6	200.6	20.4	67	0.9	114.3	20.9	66
2019-06-26	08:00:00	2.7	230.7	21.4	72	1.7	187.6	21	67	1.1	98.3	21.6	66
2019-06-26	09:00:00	2.1	231.2	22.7	69	2	171.5	22	66	1.4	99.8	22.6	65
2019-06-26	10:00:00	2.5	223.3	24.2	65	1.6	191.3	23.8	61	1.2	108.6	24.4	60
2019-06-26	11:00:00	2.8	215	24.6	62	2.5	181.3	24.1	59	1.2	135.5	24.7	57
2019-06-26	12:00:00	2.9	225	24.9	59	1.8	164.4	24.6	56	1.4	113.9	24.9	55
2019-06-26	13:00:00	1.5	209.5	25.6	57	1.1	147.3	25.2	54	1.2	102.2	25.3	54
2019-06-26	14:00:00	1.3	220.3	26.1	55	1.3	198.1	25.7	49	0.9	124.6	26	51
2019-06-26	15:00:00	0.9	267.9	25.5	56	0.9	290.4	25.4	51	1	268.2	25.2	53
2019-06-26	16:00:00	2	7.1	24.4	64	1.7	342.1	24.6	57	1.9	326.2	24.3	60
2019-06-26	17:00:00	1.8	47.7	24.1	70	3.4	32.7	23.8	64	2.3	348	23.5	68
2019-06-26	18:00:00	1.7	43.9	23.2	74	3.4	33.3	22.8	71	2.1	349.8	22.7	72
2019-06-26	19:00:00	1.9	53.9	22.5	70	4.5	29.1	22.2	66	2.2	356.6	22.3	66
2019-06-26	20:00:00	1.9	64.5	21.6	70	3.4	32.8	21.7	65	2	352.9	21.5	67
2019-06-26	21:00:00	1.5	8.6	20.8	74	2.5	32.1	21	67	1.2	343.7	20.7	70
2019-06-26	22:00:00	1.6	354.9	20.1	80	1.4	32.8	20.6	69	0.9	328.9	20	76
2019-06-26	23:00:00	1.7	3	19.7	85	1.1	16.6	20.4	70	1.1	320	19.6	78
2019-06-27	00:00:00	1.4	0.4	19.3	86	0.7	349.5	20	74	1	334	19.5	78
2019-06-27	01:00:00	1.8	2.9	19.1	89	1.4	306.2	19.5	78	1.1	324	19.4	79
2019-06-27	02:00:00	1.5	3.7	19	91	1.2	4.8	19.5	77	1.2	326	19.2	81
2019-06-27	03:00:00	1.5	2.9	18.9	92	0.9	321.1	19.5	78	1	308.3	18.9	84
2019-06-27	04:00:00	1.2	6.5	18.5	95	1.1	334.3	18.9	82	0.9	318.1	18.7	86
2019-06-27	05:00:00	1.2	13.1	18.3	98	1.9	27.1	18.8	84	1.2	341.7	18.3	89
2019-06-27	06:00:00	1.6	5.5	18.3	97	2.3	26.2	18.6	85	1.1	338.2	18.3	89
2019-06-27	07:00:00	1.3	7.9	18.4	90	2.2	33.8	18.8	79	1.3	347.8	18.5	83
2019-06-27	08:00:00	1.2	4.7	18.4	92	1.8	35.1	18.6	83	1.2	350.1	18.5	85
2019-06-27	09:00:00	1.2	35.6	19	90	1.5	43.5	19.1	82	1	356.5	19	83
2019-06-27	10:00:00	1.4	86.2	19.9	84	1.4	62.6	19.7	78	1.4	48.5	19.8	78
2019-06-27	11:00:00	1.2	111.4	20.7	80	0.9	54	20.9	73	1	44	20.7	74
2019-06-27	12:00:00	1.1	160.9	21.2	79	1.3	185.8	21.1	73	0.7	105.2	21.2	73
2019-06-27	13:00:00	1.9	224.6	21.4	79	1.6	191.5	21	74	1.1	144.2	21.6	72
2019-06-27	14:00:00	1.5	280.9	20.1	89	2.9	215.2	20.4	77	1.7	266.2	19.9	83
2019-06-27	15:00:00	2.1	293.7	18.7	97	3.1	236.8	19.6	79	1.8	264.1	19	88
2019-06-27	16:00:00	2.4	350.4	17.1	100	2.5	318.1	17.2	94	2.6	295.4	17.1	96
2019-06-27	17:00:00	2	5.3	16.6	100	3	29.4	16.6	95	1.5	332.7	16.4	96
2019-06-27	18:00:00	1.9	11.8	16.6	100	2.6	15.8	16.5	96	1.7	331.6	16.5	98
2019-06-27	19:00:00	1.9	14.2	16.5	100	2.5	12.2	16.4	96	1.5	333.1	16.2	99
2019-06-27	20:00:00	1.3	24.7	16.3	100	2.4	23.2	16.4	94	1.2	340.2	16.2	98
2019-06-27	21:00:00	0.8	4.7	16.3	100	0.6	350.3	16.5	92	0.7	345.6	16.3	95
2019-06-27	22:00:00	1.2	4.6	16.4	100	0.7	331.7	16.6	94	1.1	295.9	16.4	97
2019-06-27	23:00:00	1.6	6.1	16.3	100	0.9	345.7	16.4	93	1	313.4	16.3	96
2019-06-28	00:00:00	1.1	10.8	16.2	100	0.9	310.8	16.3	93	1.1	298.9	16.2	95
2019-06-28	01:00:00	1.1	4.1	16.1	100	1.5	304.8	16.2	94	1.5	303	16.2	96
2019-06-28	02:00:00	0.9	4.2	15.8	100	1.1	313.3	15.9	94	1.4	301.6	16	95
2019-06-28	03:00:00	0.8	357.6	15.7	100	1.3	337.1	15.7	93	1.1	302.5	15.8	94
2019-06-28	04:00:00	0.6	354.5	15.5	100	0.6	321.5	15.6	92	1	302.6	15.6	93
2019-06-28	05:00:00	0.4	2	15.4	100	0.8	289.7	15.6	92	0.8	274.2	15.6	93
2019-06-28	06:00:00	0.7	279.9	15.4	100	1.1	225.7	15.5	92	0.9	255.9	15.5	92
2019-06-28	07:00:00	1.1	244.4	15.6	100	1.6	235.3	15.7	92	0.6	237.3	15.7	93
2019-06-28	08:00:00	1.3	256	16.3	99	1.6	232.6	16.5	89	0.7	184.9	16.6	90
2019-06-28	09:00:00	1.6	242.2	17.6	94	1.6	225.7	17.8	84	0.8	250.8	17.9	85
2019-06-28	10:00:00	1	231.1	19.6	86	1.4	223.2	19.1	80	0.7	291.2	19.6	79
2019-06-28	11:00:00	1.3	231.2	21.6	78	1.4	218.4	21	72	0.9	279.2	21.5	73
2019-06-28	12:00:00	1.5	259.5	23.6	67	1.6	235	23.6	59	1.1	304.5	23.6	61
2019-06-28	13:00:00	2.2	328.8	25.4	50	2.2	227.2	25.4	48	1.8	268.5	25.8	46
2019-06-28	14:00:00	2.6	320.5	27.1	40	2.6	268.2	27	36	2.3	279.1	27.2	36
2019-06-28	15:00:00	2.2	333.1	28.2	35	2.4	297.1	27.9	32	2.3	277.2	28.4	32
2019-06-28	16:00:00	2.5	348.3	29.2	28	2.9	313.6	29	24	3	299.8	29.3	25
2019-06-28	17:00:00	2.8	338.6	30	25	3.7	298.7	29.4	22	3.4	294.8	29.9	22
2019-06-28	18:00:00	2.9	358	30.2	23	3.2	304.1	29.7	20	3.4	290.3	30.1	20
2019-06-28	19:00:00	2.4	356.8	30	25	2.9	302.9	29.5	22	2.8	300.2	29.7	22
2019-06-28	20:00:00	1.5	347.2	28.7	28	1.7	299.5	28.2	26	1.7	283	28.6	25
2019-06-28	21:00:00	1	315.1	26.9	32	0.9	277.9	26.1	32	1.6	261.9	26.9	29
2019-06-28	22:00:00	0.9	333.8	25.9	35	0.9	266	24.5	38	1.6	257.5	26.4	29
2019-06-28	23:00:00	0.6	297	24.7	40	1.3	280.2	23.5	40	1.9	252.9	25.8	30
2019-06-29	00:00:00	0.7	65.8	23.8	43	1.2	276.4	22.8	42	2	260.4	24.9	35
2019-06-29	01:00:00	1.4	23.1	22.1	50	1.5	273.9	21.6	47	2	285.7	23	43
2019-06-29	02:00:00	0.7	61.3	20.7	55	1.1	272.1	20.8	50	0.9	307.1	21.4	49
2019-06-29	03:00:00	0.7	46.5	19.9	58	1.3	272.8	20.9	50	0.9	319	21.2	50
2019-06-29	04:00:00	1.3	11.6	19.4	61	1.2	334.9	20.1	53	1	331.3	19.5	56
2019-06-29	05:00:00	1	10.5	18	65	1.5	340.8	19.2	53	1.5	298.2	18.6	56
2019-06-29	06:00:00	1.4	14.1	16.9	66	2.7	14	18.2	55	1.4	323.3	17.4	59
2019-06-29	07:00:00	1.3	44.1	17.1	66	2.7	30	17.7	58	1.3	344	16.6	64
2019-06-29	08:00:00	1.8	8.2	18	64	3.2	31.9	18.2	57	1.6	351.3	18	60
2019-06-29	09:00:00	1.9	35	20.3	54	2.3	24.3	20.4	50	1.8	347.1	20.3	52
2019-06-29	10:00:00	2.4	32.9	22.1	47	2.6	20	22.1	42	2.4	338.3	22.2	43
2019-06-29	11:00:00	3	19.3	23.4	42	3.5	0.2	23.2	38	2.8	327.4	23.5	38
2019-06-29	12:00:00	2.6	27.8	24.8	39	3.4	342.5	24.3	34	3.2	326.1	24.5	36
2019-06-29	13:00:00	2.9	16	25.3	37	3.6	349.2	24.8	33	3.6	309.1	24.9	34
2019-06-29	14:00:00	3	12.1	25.8	37	3.5	335.9	25.1	34	3.8	311.1	25.4	34
2019-06-29	15:00:00	3.4	14.7	26.1	36	3.5	332.5	25.7	33	3.6	305.1	25.9	33
2019-06-29	16:00:00	3.1	6.6	26.7	35	3.2	335.5	26.2	31	3.3	310.3	26.2	32
2019-06-29	17:00:00	2.5	47.4	27.3	32	2.9	348.3	26.7	29	2.8	340.6	26.8	30
2019-06-29	18:00:00	2.6	41.7	27.1	32	3.4	12.5	26.5	29	3	346.7	26.6	30
2019-06-29	19:00:00	2	44.6	26.4	33	3.3	28.1	25.9	30	2.7	350.5	25.9	31
2019-06-29	20:00:00	1.9	22.9	25.1	36	2.9	20.5	25	32	1.9	353.9	24.8	34
2019-06-29	21:00:00	2.1	14.4	23.7	40	2.2	354.8	23.7	35	1.6	334.7	23.4	37
2019-06-29	22:00:00	1.4	15.2	22.1	46	1.7	8.9	22.6	40	1.6	336.3	21.8	43
2019-06-29	23:00:00	1	18.2	20.9	51	1.6	11.2	21.3	45	1.2	320.5	20.4	48
2019-06-30	00:00:00	1.3	0.4	19.7	56	1.2	0.7	20.2	49	0.8	310	19.4	53
2019-06-30	01:00:00	1.1	6.1	18.3	63	1.2	336.8	19	54	1.1	292.8	18.4	58
2019-06-30	02:00:00	1.2	4.2	17	68	0.8	344.3	18.3	57	0.9	307.4	17.5	61
2019-06-30	03:00:00	1	4.2	16.2	72	0.9	347.7	17.7	60	0.8	298.5	16.7	64
2019-06-30	04:00:00	0.8	9.3	15.6	75	0.6	329.3	17.1	63	0.8	293.8	16.3	66
2019-06-30	05:00:00	1	15.9	15	77	0.7	297.4	16.1	69	0.7	309.4	16	67
2019-06-30	06:00:00	1.3	7.3	14.5	80	0.8	334.4	15.7	70	0.9	333.2	15.3	70
2019-06-30	07:00:00	1.6	0.7	14.9	79	1.1	24.7	16.8	64	1.5	331.4	15	71
2019-06-30	08:00:00	1.1	0.1	17.2	70	0.9	38.1	18.7	58	0.9	337.4	17.4	64
2019-06-30	09:00:00	1	350.1	20.3	54	0.6	35.6	21.3	46	0.6	330.7	20.8	50
2019-06-30	10:00:00	1.1	27.9	22.8	42	0.7	17.7	23.3	34	0.9	341.5	22.7	36
2019-06-30	11:00:00	2.1	337.1	23.3	37	1.1	6	24.2	30	1.3	338.9	23.6	33
2019-06-30	12:00:00	2.1	5.2	24.6	34	2	35.2	24.6	30	1.9	336.4	24.5	31
2019-06-30	13:00:00	2	23.4	25.5	34	2	41.1	25.4	30	2	6.4	25.3	31
2019-06-30	14:00:00	2.6	22.9	26.2	32	1.6	36	26.1	28	1.4	20.4	26.4	29
2019-06-30	15:00:00	2.6	62.9	27.2	30	1.8	36.8	26.8	27	2	356.6	27	28
2019-06-30	16:00:00	2.6	60.5	27.8	30	1.6	15.7	27.6	27	1.7	327.1	27.4	28
2019-06-30	17:00:00	1.6	359.3	28.4	29	2.1	1.1	28.1	25	1.8	302.1	28.1	26
2019-06-30	18:00:00	2.2	25.9	27.4	32	2.3	341.5	27	28	2.4	328.7	27.2	30
2019-06-30	19:00:00	1.9	30	26.4	38	2.6	26.9	26.3	33	2	350.1	26.1	35
2019-06-30	20:00:00	1.2	343.4	26.7	36	0.8	29.8	26.5	31	0.8	321.3	26.6	32
2019-06-30	21:00:00	0.8	1.1	25.5	38	0.4	306.4	25.2	35	0.5	324.7	25.5	33
2019-06-30	22:00:00	0.8	6.6	24.5	46	0.2	230.7	24	44	0.5	23	25	38
2019-06-30	23:00:00	0.8	358.4	22.4	55	0.4	227.4	22.4	50	0.5	259.5	23.4	46
2019-07-01	00:00:00	0.8	9.2	20.9	60	0.3	248.9	21	54	0.4	299.6	22.1	51
2019-07-01	01:00:00	0.8	8.2	19.4	69	0.2	337.8	20.3	58	0.5	278.9	20.4	59
2019-07-01	02:00:00	0.6	356.9	18.2	75	0.4	290.7	19.2	61	0.8	287.1	18.8	65
2019-07-01	03:00:00	0.9	359.1	17.5	76	0.6	330.6	18.5	65	0.8	287.2	17.6	70
2019-07-01	04:00:00	0.7	359.1	16.7	79	0.6	295.9	17.7	68	0.8	291.6	17	73
2019-07-01	05:00:00	1.1	11.8	16.2	81	0.5	305.1	17.1	71	0.7	339.1	17.2	70
2019-07-01	06:00:00	0.7	356.5	15.8	82	0.3	315.3	17.2	72	0.6	333.6	16.9	69
2019-07-01	07:00:00	0.7	347.2	17.2	78	0.4	54.5	19.3	66	0.4	0.4	18	67
2019-07-01	08:00:00	0.5	340.2	21.1	64	0.4	170.7	21.9	54	0.4	64.8	21.8	54
2019-07-01	09:00:00	1.3	255.4	22.7	56	0.8	172.4	23.4	43	0.8	98	22.8	46
2019-07-01	10:00:00	2.5	224.1	25.2	43	2.8	163.1	24.2	41	1.7	103.9	24.9	40
2019-07-01	11:00:00	3.1	229.9	27.1	38	2.6	162.6	26.3	36	1.7	118.6	27.3	34
2019-07-01	12:00:00	2.8	233.3	29	35	2.8	192.8	28.4	31	1.8	122.5	29.1	31
2019-07-01	13:00:00	1.9	229.3	30.3	33	2	178.4	29.8	29	1.5	162.9	30.4	29
2019-07-01	14:00:00	2.2	223.8	31.6	30	1.2	317.3	30.8	26	1.4	233.9	31.6	27
2019-07-01	15:00:00	2.2	255	31.8	26	3.3	195	30.8	27	1.3	247.4	32.1	22
2019-07-01	16:00:00	4.6	234	31.3	31	3.2	194.7	30.8	28	1.8	160.4	32.1	27
2019-07-01	17:00:00	3.5	236.8	31.4	30	2.7	204.3	30.3	28	2	194.1	31.3	29
2019-07-01	18:00:00	4.2	231.6	29.7	36	3	190.2	28.4	36	1.3	137.8	29.8	34
2019-07-01	19:00:00	4.4	225.1	29.1	35	3.8	194.6	28.2	33	1.4	174.7	29.3	31
2019-07-01	20:00:00	3.8	226.1	27.8	39	3.3	196.6	27.2	37	1.4	172.9	27.7	35
2019-07-01	21:00:00	2.8	234.7	26.6	42	2.9	203.2	26.1	39	0.9	209.7	26.4	39
2019-07-01	22:00:00	2.6	226.4	26	44	2.2	204.4	25.2	42	0.7	219.1	25.3	42
2019-07-01	23:00:00	1.6	223.6	25.1	46	1.3	213.8	24.2	45	0.4	222.1	24.6	44
2019-07-02	00:00:00	0.4	188.3	24	49	0.6	225.5	23	49	0.2	195.1	24	47
2019-07-02	01:00:00	0.6	15.2	22.6	55	0.2	259	22.2	55	0.3	275.3	23.1	52
2019-07-02	02:00:00	0.6	20.6	20.5	65	0.3	296.8	20.9	63	0.8	297.5	20.8	59
2019-07-02	03:00:00	0.8	10.5	19.2	70	0.5	301.7	19.7	66	0.8	291.7	19.7	63
2019-07-02	04:00:00	0.7	0.4	18.3	76	0.3	276.2	19.1	66	0.6	308.1	19.1	66
2019-07-02	05:00:00	0.8	17	17.9	78	0.4	271.1	18.6	71	0.6	289.4	18.7	68
2019-07-02	06:00:00	0.6	337.6	17.5	79	0.6	235.1	18.1	70	0.3	294.1	18.3	70
2019-07-02	07:00:00	0.8	359.6	19.1	74	0.2	285.2	20.1	66	0.4	354	19.8	66
2019-07-02	08:00:00	0.8	238.5	23	60	0.5	196.5	22.6	56	0.7	100.5	22.8	56
2019-07-02	09:00:00	1.7	227.8	24.2	54	1.1	225.9	23.7	51	0.9	161.2	24.4	51
2019-07-02	10:00:00	1.5	219.8	26.1	50	1.2	191.8	25.5	47	1	143.2	26	47
2019-07-02	11:00:00	1.5	217.8	28.5	45	1.6	191.8	27.4	42	1.2	117.3	28.2	42
2019-07-02	12:00:00	2.1	255.7	30.3	36	1.3	313.1	30.4	31	1.5	265.6	30.5	32
2019-07-02	13:00:00	1.4	295.7	31.9	31	1.1	311.5	31.9	27	1.4	226.3	32.1	27
2019-07-02	14:00:00	1.6	312.7	33.1	26	1.6	213.5	32.7	22	1.6	314.9	33.2	23
2019-07-02	15:00:00	2	5.3	33.6	25	1.4	299.6	33.9	19	1.4	297	33.6	21
2019-07-02	16:00:00	1.8	343	34	24	1.5	276.1	34.1	20	1.6	326.8	33.6	21
2019-07-02	17:00:00	2	315.7	34.8	22	1.6	246.4	34.5	18	1.7	338.5	34.4	20
2019-07-02	18:00:00	2.1	312.7	34.4	23	1.7	274	34.1	20	1.9	261	34.3	20
2019-07-02	19:00:00	2.8	48.7	32.9	26	2.4	22.3	33	21	2	329.6	33.1	23
2019-07-02	20:00:00	4	124	29.8	35	2.9	76.8	29.5	32	2	67	29.6	32
2019-07-02	21:00:00	—	—	—	—	2	84.6	27.6	36	1.4	73.9	27.7	37
2019-07-02	22:00:00	1.5	151.5	26.9	42	1	82	26.3	40	1.2	91.8	26.8	39
2019-07-02	23:00:00	1.3	201	26	44	1	167.4	25.7	42	1.1	95.3	26.2	41
2019-07-03	00:00:00	0.7	124.3	25.5	46	1.2	81.4	25	44	0.5	48.7	25.5	43
2019-07-03	01:00:00	1.4	357.3	23.8	52	1.1	341.8	24.2	47	1	305.8	23.9	48
2019-07-03	02:00:00	0.9	357.2	22.4	56	0.8	49.9	23.4	50	0.6	350.9	22.6	52
2019-07-03	03:00:00	1.4	11.7	22.1	57	1.1	46.7	22.6	50	1	332.1	22.1	53
2019-07-03	04:00:00	1.4	2.2	20.4	66	0.6	336.3	21.5	56	1.1	293.8	20.2	63
2019-07-03	05:00:00	0.9	0.9	19.1	73	0.9	320.2	19.9	64	1.2	285	18.9	69
2019-07-03	06:00:00	1.1	7.1	18.2	77	0.7	317.4	19.3	67	1.1	314.9	18.6	69
2019-07-03	07:00:00	1.2	1	18.7	73	0.6	337.5	20.4	62	1	303.7	19.3	65
2019-07-03	08:00:00	0.8	338	21.5	65	0.5	330.7	22.8	55	0.6	317	21.8	58
2019-07-03	09:00:00	0.7	347.5	25.4	53	0.9	55.3	25.4	47	0.7	4.5	25.2	48
2019-07-03	10:00:00	0.8	264.9	27.7	44	1.1	161.7	27.1	40	1	87.8	27.3	40
2019-07-03	11:00:00	2	241	28.8	40	1.4	223.9	28.4	37	1.1	164.7	28.8	36
2019-07-03	12:00:00	1.4	217.8	30.4	36	1.3	186.3	30	34	1	129.1	30.4	33
2019-07-03	13:00:00	2.2	292.5	31.1	34	1.6	191.6	30.9	32	1.3	38	31.3	30
2019-07-03	14:00:00	1.7	276.1	32.6	31	1.3	133.5	32.1	28	1.4	315.1	32.2	27
2019-07-03	15:00:00	2.1	314.9	33.1	29	1.3	255.5	33.2	24	1.6	353.2	33.2	25
2019-07-03	16:00:00	1.6	325.9	33.8	26	1.1	10	33.8	22	1.7	45.1	33.5	24
2019-07-03	17:00:00	1.6	31.9	33.8	26	1.2	28.4	34.3	21	1.3	359.2	33.4	23
2019-07-03	18:00:00	2	28.4	33.8	25	1.7	36.6	33.4	22	1.8	351.3	33.5	23
2019-07-03	19:00:00	1.6	9.3	33.4	25	1.2	35.8	33	23	1.4	352.8	33.1	23
2019-07-03	20:00:00	1.2	14	32.6	25	0.7	331.2	32.4	23	0.9	353.3	32.5	22
2019-07-03	21:00:00	1	129.8	31.6	30	0.8	47.2	31.5	25	0.6	51.9	31.4	26
2019-07-03	22:00:00	0.7	226.3	30.1	34	0.6	199.7	29.8	32	0.5	92	30.2	30
2019-07-03	23:00:00	0.8	3.1	28.3	42	0.4	243.2	27.8	38	0.3	216.9	29	33
2019-07-04	00:00:00	0.9	21.4	25.7	50	0.8	259.6	26.5	40	0.5	253.6	27.4	38
2019-07-04	01:00:00	0.8	4	25.3	51	0.9	261.9	25.7	41	0.6	2.8	25.9	43
2019-07-04	02:00:00	0.8	239	25.1	50	0.8	221.7	25.8	41	0.8	150.5	25.6	43
2019-07-04	03:00:00	1.2	235	25.5	47	1.1	200.8	25.3	43	0.6	151.8	25.3	44
2019-07-04	04:00:00	1.5	238	25	50	1.9	216.1	24.7	46	0.6	193.1	24.8	46
2019-07-04	05:00:00	1.9	239.9	24.1	54	1.5	220.1	23.6	49	0.8	233.5	23.7	51
2019-07-04	06:00:00	1.1	255.6	23.3	56	1.3	213.6	23	50	0.7	224.1	23.2	52
2019-07-04	07:00:00	1.6	263.7	23.8	54	1	212.3	23.4	50	0.6	235.3	23.7	51
2019-07-04	08:00:00	1.3	264.4	24.9	52	0.8	207.4	25	47	0.9	237.9	24.8	49
2019-07-04	09:00:00	2.2	264.3	26	51	1.9	217.8	25.5	48	1.5	261.7	26.4	46
2019-07-04	10:00:00	3	265.7	27.9	44	3.6	224.1	27.6	40	2.4	253.3	28.2	39
2019-07-04	11:00:00	3.1	261.5	29.2	39	3	231.8	29	34	1.9	260	29.8	33
2019-07-04	12:00:00	3.6	243.3	30.6	35	3.1	221.9	30.5	31	1.7	216.1	31.4	30
2019-07-04	13:00:00	3.6	254.1	31.8	31	3.7	219	31.7	27	1.8	247.9	32.8	27
2019-07-04	14:00:00	3.6	249.2	32.6	30	3.4	228.9	32.5	26	2	238	33.4	25
2019-07-04	15:00:00	2.7	291	33.2	30	4.1	222	32.9	25	2.6	268.4	33.7	26
2019-07-04	16:00:00	2.7	308.9	34	28	3.5	236.4	33.4	24	2.7	269.3	34.3	24
2019-07-04	17:00:00	2.6	298.4	34.2	27	3.6	231	33.5	24	2.5	272	34.4	23
2019-07-04	18:00:00	2.7	289.5	34	26	2.8	241.4	33.6	24	2.4	266.2	34.4	23
2019-07-04	19:00:00	3	273.4	33.7	27	2.4	245.8	33.6	22	2.4	258.6	34.2	23
2019-07-04	20:00:00	1.8	297.4	32.9	27	2	251.7	32.6	24	1.9	264.1	32.7	25
2019-07-04	21:00:00	1.8	267.2	31.4	30	2.3	235.1	30.8	27	1.6	249.3	31	27
2019-07-04	22:00:00	2.4	237.9	30.3	33	2.8	214.5	29.8	30	0.7	232.1	29.8	30
2019-07-04	23:00:00	3.7	223.9	29.5	36	3.1	208.8	28.8	33	1	207.6	29.1	33
2019-07-05	00:00:00	3.4	228.3	28.5	40	3.2	205.8	27.9	37	1.1	193.4	28.1	37
2019-07-05	01:00:00	3.5	237.1	27.5	43	3.3	208.3	27.1	39	1.3	210.1	27.2	40
2019-07-05	02:00:00	4.1	230.1	26.8	45	3.5	208.1	26.2	42	1.1	197	26.4	42
2019-07-05	03:00:00	3.2	232.2	26.1	46	3.1	208.6	25.6	43	1.1	204	25.7	43
2019-07-05	04:00:00	2.8	224.6	25.6	47	3	202.7	25.2	44	1	179.2	25.3	44
2019-07-05	05:00:00	2.4	236.2	25.2	49	3	205.9	24.5	46	1	226.8	24.8	46
2019-07-05	06:00:00	2	244.4	24.2	52	2	220	23.6	49	0.6	222.3	23.9	49
2019-07-05	07:00:00	1.4	265.3	24.2	53	2	219.5	23.9	49	1.1	253.5	24.2	48
2019-07-05	08:00:00	1.9	280.2	24.8	52	2.1	233.8	24.6	48	1.9	249.2	24.8	48
2019-07-05	09:00:00	2.4	337.1	25.8	49	3	287.6	25.5	46	3	279.3	25.8	46
2019-07-05	10:00:00	3.1	7.3	27	45	3.4	321.6	26.6	41	3.2	304.2	26.9	41
2019-07-05	11:00:00	3.5	26.8	27.5	41	4.1	356.2	27.2	38	4.3	337.9	27.1	38
2019-07-05	12:00:00	3.5	25.3	27.6	38	4.5	355	27.1	35	3.8	320	27.4	35
2019-07-05	13:00:00	4.2	6.3	28.1	35	4.4	351.5	27.6	32	4.4	313.4	27.7	32
2019-07-05	14:00:00	4.1	5.4	28.4	33	4.8	336.2	27.9	30	4.4	304	28.2	30
2019-07-05	15:00:00	3.9	23.1	28.5	35	4.3	328.3	28.1	32	4	319	28.4	32
2019-07-05	16:00:00	3.8	18.2	28.3	36	4.6	0.5	28	32	4	320.5	28.2	33
2019-07-05	17:00:00	3.6	27.1	28.6	34	4.5	347.5	28.2	30	4.1	316.9	28.5	30
2019-07-05	18:00:00	3	29.8	27.1	42	5.1	20.7	26.4	39	4.1	343.4	26.4	40
2019-07-05	19:00:00	3.1	48.2	25.8	44	5	26.7	25.2	41	3.8	356.1	25.3	42
2019-07-05	20:00:00	3.1	63.8	24.2	45	5.1	31.8	23.6	42	3.1	3.1	23.8	43
2019-07-05	21:00:00	2.8	61.3	22.8	49	4.5	34.6	22.5	46	3	355.3	22.5	47
2019-07-05	22:00:00	1.7	48.4	21.5	54	3.5	30.5	21.4	51	2.2	345.6	21.2	52
2019-07-05	23:00:00	1.5	41.8	20.7	52	3.8	29.4	20.8	48	1.8	345.9	20.5	50
2019-07-06	00:00:00	1.5	30.5	19.7	52	3.7	30.2	20	48	1.9	346.5	19.6	50
2019-07-06	01:00:00	1.7	21.7	18.7	54	3.6	29.4	19	49	1.9	338.9	18.5	52
2019-07-06	02:00:00	1.6	24.6	17.6	57	3.4	30.5	18	52	1.8	341.3	17.4	55
2019-07-06	03:00:00	2	22.5	16.3	60	2.3	11.6	16.7	54	1.8	326.1	15.8	58
2019-07-06	04:00:00	1.5	41	15	64	2.6	11.8	15.6	56	2	330.2	14.9	60
2019-07-06	05:00:00	1.4	15.3	14	67	2.5	33.1	14.5	61	1.8	343.7	13.6	65
2019-07-06	06:00:00	2	6.6	13.2	71	1.9	7.6	13.7	64	1.7	322.4	12.9	69
2019-07-06	07:00:00	1.6	44.7	14	69	2.1	30.9	14.4	62	1.7	353.6	13.5	68
2019-07-06	08:00:00	2	65.4	16.4	58	2.6	32.5	16.2	55	1.8	350.8	16	57
2019-07-06	09:00:00	2.1	59.6	19.3	45	2.4	50.8	18.8	43	1.9	348.5	18.8	44
2019-07-06	10:00:00	2.3	67.7	20.6	38	2.6	36.4	20.2	36	2.3	7.9	20.2	36
2019-07-06	11:00:00	2.6	50.3	21.4	37	2.5	353.1	21	34	2.2	318.9	21	35
2019-07-06	12:00:00	2.7	11.4	22.2	35	2.2	358	22.2	31	2.1	327.5	22.1	32
2019-07-06	13:00:00	2.8	21.9	23.2	32	2.4	9.1	23.1	29	2.4	337.1	23	29
2019-07-06	14:00:00	2	16.7	24.8	28	1.9	359.6	24.5	25	2.1	321.3	24.4	26
2019-07-06	15:00:00	2	47.9	25.6	27	1.8	17.3	25.6	23	2	323.2	25.5	24
2019-07-06	16:00:00	3	354.5	26.2	26	2	319.7	26.4	22	1.8	314.3	26.3	23
2019-07-06	17:00:00	2.8	9.6	27.2	25	2	0.8	27.2	21	2.3	313.8	26.9	22
2019-07-06	18:00:00	2.2	29.5	27.7	23	2.4	16.6	27.1	21	2	333.1	27.4	21
2019-07-06	19:00:00	1.8	64.2	28	21	1.8	53.8	27.4	19	1.9	344.8	27.3	20
2019-07-06	20:00:00	2	91.6	27.1	23	2.1	67.1	26.6	19	1.7	27.8	26.8	20
2019-07-06	21:00:00	2.7	111.4	25.3	25	2.2	70.8	25	22	2	55.5	25.2	23
2019-07-06	22:00:00	2.1	109.8	24	26	1.6	73.4	23.5	24	2.3	59.5	24.1	24
2019-07-06	23:00:00	2.4	121.9	22.8	30	1.3	74.7	22.6	26	1.3	54.9	22.8	27
2019-07-07	00:00:00	1.6	73.1	21.6	33	1.3	71.4	21.8	28	0.7	15.4	21.5	30
2019-07-07	01:00:00	1.2	5.7	19.2	42	1.3	53.7	21	31	1	297.7	19.1	38
2019-07-07	02:00:00	1.5	2.3	17.4	47	0.8	341.2	19.3	37	1	314.8	17.6	42
2019-07-07	03:00:00	1	9	15.9	51	0.9	331.3	17.8	41	1.1	310	16.8	45
2019-07-07	04:00:00	1.1	8.1	15	56	0.7	324.6	16.8	45	1.1	315	15.6	49
2019-07-07	05:00:00	1	7.2	14.3	59	0.7	314.3	15.6	51	1	294	15	52
2019-07-07	06:00:00	1.2	21.6	13.5	62	0.7	336.1	15.2	54	1	298.8	14.6	54
2019-07-07	07:00:00	1.4	6.9	14.3	62	1	350.5	16.2	50	1.1	321.1	14.8	54
2019-07-07	08:00:00	1.4	349.8	16.6	57	0.9	15.6	18.4	45	1.1	331.5	17.2	50
2019-07-07	09:00:00	1.1	356.3	20.4	47	0.8	46.5	21.7	37	0.6	314.4	20.7	42
2019-07-07	10:00:00	1.2	168.6	24	32	1.1	72.2	23.8	29	0.9	107.9	23.8	31
2019-07-07	11:00:00	1.4	65.2	24.9	30	1.2	38.5	24.5	28	1.2	332.9	24.8	27
2019-07-07	12:00:00	1.7	64.7	25.5	28	1.2	11.4	25.8	24	1.4	320.3	25.6	25
2019-07-07	13:00:00	1.4	330.5	27.1	25	1.4	192	26.5	22	1.4	249.4	26.5	23
2019-07-07	14:00:00	1.8	228.3	27.8	23	1.3	153.9	27.6	20	1.4	36.9	27.7	20
2019-07-07	15:00:00	1.6	254	28.8	21	1.1	204.1	29	18	1.3	110.9	28.7	19
2019-07-07	16:00:00	2	230.9	29.7	20	1.2	114.4	29.9	17	1.2	233.9	29.9	18
2019-07-07	17:00:00	1.8	169.8	30.6	19	2.1	195.9	30.1	17	1.4	84	30.5	17
2019-07-07	18:00:00	1.5	180.2	31.1	18	2.4	199.7	29.9	16	1.2	117.3	31.1	16
2019-07-07	19:00:00	1.9	168.9	30.7	18	1.6	193.5	30.1	15	1.1	115.3	30.6	16
2019-07-07	20:00:00	1.7	137.3	29.4	18	1.3	130.3	29	15	1.4	92.3	29.2	16
2019-07-07	21:00:00	2	128	28	20	0.7	83.1	27.7	14	0.8	79.1	27.6	17
2019-07-07	22:00:00	1.7	126	26.7	20	0.4	73.2	26.4	18	0.4	83.2	26.3	19
2019-07-07	23:00:00	0.9	29.3	25.1	24	0.4	133.9	25.4	22	0.3	72.5	25.5	21
2019-07-08	00:00:00	0.7	25.2	22.9	32	0.8	140.8	24.7	22	0.6	88.7	24.9	22
2019-07-08	01:00:00	1.4	196.5	23.4	33	1.3	121.9	23.9	27	1.6	100.2	24.1	28
2019-07-08	02:00:00	2.5	213.7	23	42	2.2	168.3	22.6	38	1.5	118.3	22.8	39
2019-07-08	03:00:00	2.4	211.9	22.3	49	2.7	165	22	46	1.6	108	22.1	46
2019-07-08	04:00:00	2.1	215.4	21.7	53	2.7	175.7	21.4	50	1.4	110.3	21.4	50
2019-07-08	05:00:00	2	215.6	20.9	56	2.7	170.7	20.8	53	1.3	119.1	20.7	54
2019-07-08	06:00:00	2	218	20.4	59	2.6	170.8	20.2	56	1.3	117	20.2	56
2019-07-08	07:00:00	2.3	214.4	20.4	60	3.2	169.5	20.1	58	1.5	113.9	20.2	58
2019-07-08	08:00:00	2.9	213.4	20.4	62	3.2	169.5	20.1	59	1.4	119.4	20.2	59
2019-07-08	09:00:00	3.1	218.4	21	63	3.1	172.6	20.5	60	1.8	129.2	20.9	59
2019-07-08	10:00:00	4	215.4	21.1	64	2.7	209.2	21	60	1.8	147.1	21.3	59
2019-07-08	11:00:00	3.4	224.8	21.7	64	3.2	201.5	21.5	60	1.6	164.6	22	58
2019-07-08	12:00:00	3.3	229.6	22.8	61	3	199.8	22.6	58	1.5	149.3	23.5	55
2019-07-08	13:00:00	2.8	278.2	24.6	53	2.8	225.4	24.5	49	1.9	258.8	25.3	47
2019-07-08	14:00:00	2.2	293.1	25.4	46	2.3	254.3	25.4	42	2.2	270.5	25.5	42
2019-07-08	15:00:00	2.4	307.7	25.4	46	2.6	266	25.5	41	—	—	—	—
2019-07-08	16:00:00	2.6	1.8	24.3	49	2.6	300.7	24.5	44	2.2	310.2	22.4	55
2019-07-08	17:00:00	3	295	20.2	74	—	—	—	—	2.8	255.1	19.3	75
2019-07-08	18:00:00	2.4	314.1	18.9	81	2.2	258.7	18.5	80	3.1	270.1	18.5	80
2019-07-08	19:00:00	1.3	301.6	19	80	1.2	236.4	18.9	79	1.8	266.6	18.9	76
2019-07-08	20:00:00	1	296.9	19.4	79	1.1	291.2	19.1	78	1	258.5	19.2	76
2019-07-08	21:00:00	0.9	341.2	19.7	74	0.8	287.5	19.5	72	0.8	273.3	19.4	71
2019-07-08	22:00:00	0.9	207.2	19.2	82	1.1	228.1	19.2	74	0.7	142.2	19.2	75
2019-07-08	23:00:00	0.8	169.7	18.4	86	1.9	209.3	18.5	79	1.1	268.3	18.7	75
2019-07-09	00:00:00	1.4	245.4	18.3	85	2.2	206.5	17.6	85	0.9	248.3	18.4	78
2019-07-09	01:00:00	1.2	270.6	17.7	91	1.1	213.3	17.4	85	0.6	267.2	17.7	85
2019-07-09	02:00:00	0.9	328.4	17.3	91	0.7	305.3	17.3	86	0.9	276	17.2	85
2019-07-09	03:00:00	1.2	304.9	16.7	94	1.3	292.4	16.7	87	1	268.8	16.6	87
2019-07-09	04:00:00	0.8	2.7	16.5	95	0.7	334	16.4	90	0.6	312.1	16.4	89
2019-07-09	05:00:00	0.4	320.3	16.4	98	0.6	226.8	16.7	88	0.7	268.7	16.5	90
2019-07-09	06:00:00	0.9	265	16.4	98	0.9	222	16.6	88	0.6	252.8	16.5	90
2019-07-09	07:00:00	0.6	263.9	16.4	98	0.7	219.3	16.8	86	0.5	264.7	16.6	88
2019-07-09	08:00:00	0.6	278.9	16.9	95	1	220.5	16.9	88	0.7	273.3	17	86
2019-07-09	09:00:00	1.4	279.7	17.3	93	1.5	242.3	17.2	86	1	256	17.3	87
2019-07-09	10:00:00	1.6	281.7	17.9	91	1.6	228.5	17.9	85	1.2	262.1	18	86
2019-07-09	11:00:00	1.5	314.2	19.2	81	1.8	229.5	18.9	79	1.4	273.3	19.3	76
2019-07-09	12:00:00	1.9	262.5	19.8	80	2.2	233	19.7	74	1.4	259.9	19.7	76
2019-07-09	13:00:00	2.9	268	19.6	82	2.3	240.1	20.3	70	2.3	256	19.8	75
2019-07-09	14:00:00	2.5	225.6	19.3	88	2.1	228.4	20.1	72	1.2	241.9	19.8	78
2019-07-09	15:00:00	2.4	108.3	17	95	2.6	53.2	18.1	78	1.6	46.4	16.9	87
2019-07-09	16:00:00	1	150.9	16.2	98	1.2	68.6	15.1	93	1.2	79.3	15.6	94
2019-07-09	17:00:00	1.4	219.2	17.2	88	0.8	210.6	16.6	84	0.9	163.3	17.2	82
2019-07-09	18:00:00	1.3	248.6	18.5	81	1.2	234.1	18.3	77	0.6	201.1	19.1	74
2019-07-09	19:00:00	1.2	239.5	20	74	0.8	199.7	19.5	68	0.5	224.8	20.3	70
2019-07-09	20:00:00	1.1	229.8	19.8	73	0.7	185.2	19.6	65	0.6	115.9	19.8	66
2019-07-09	21:00:00	1.4	229.1	19	72	0.8	222.2	19.1	67	0.5	121.4	19.1	67
2019-07-09	22:00:00	0.6	209	18.7	76	0.8	217.2	18.8	73	0.4	164.2	18.9	71
2019-07-09	23:00:00	0.3	161.4	18.1	81	0.5	218.6	18.2	78	0.4	85.3	18.6	74
2019-07-10	00:00:00	0.5	291.4	17.8	85	0.7	233.7	17.6	83	0.4	234.5	18.2	77
2019-07-10	01:00:00	0.5	36.2	17.1	89	0.2	253.6	17.1	86	0.5	37.1	17.5	80
2019-07-10	02:00:00	0.5	252.9	16.6	94	0.6	181.3	16.9	88	0.4	265.5	17	82
2019-07-10	03:00:00	0.6	11.2	16.4	95	0.6	227.7	16.3	90	0.3	256.3	16.8	85
2019-07-10	04:00:00	0.6	348	16.2	97	0.6	239.4	16	91	0.4	315.3	16.7	86
2019-07-10	05:00:00	0.6	323.9	15.5	100	0.6	209.8	15.6	94	0.4	289	15.7	92
2019-07-10	06:00:00	0.4	194.5	15.7	100	0.6	197.8	15.6	93	0.5	122.2	16.2	91
2019-07-10	07:00:00	0.6	210	16.2	98	0.8	229.6	15.9	91	0.5	108.5	16.4	90
2019-07-10	08:00:00	1.3	236.7	17.5	91	0.9	221.4	16.8	86	0.5	173.3	18	82
2019-07-10	09:00:00	1.6	237.6	18.7	86	1.5	201.9	18.1	82	0.8	183.7	19.2	78
2019-07-10	10:00:00	1.8	226.8	20.6	78	2.1	203.3	19.6	76	0.8	211.9	21.1	70
2019-07-10	11:00:00	1.3	211	22.7	65	1.4	202.5	21.6	64	0.8	287.6	22.8	63
2019-07-10	12:00:00	1.6	255.6	23.5	57	1.4	203.1	23.4	56	1	71.7	24.2	55
2019-07-10	13:00:00	2.1	217.2	24.9	55	2.2	163.8	24	54	1.6	112.4	24.6	52
2019-07-10	14:00:00	2.1	169.5	25.6	54	1.6	140.8	25	50	1.7	110.2	25.2	51
2019-07-10	15:00:00	2.4	156.1	25.9	51	1.4	137.2	25.4	47	2	82.4	25.6	48
2019-07-10	16:00:00	2.1	107.9	25.9	48	1.8	148.8	25.3	46	1.8	54.8	25.4	46
2019-07-10	17:00:00	2.7	116.6	23.4	65	1.5	70.3	24.4	54	1.8	57.3	23.7	59
2019-07-10	18:00:00	1.3	355.8	22.4	68	1.4	313.6	22.1	64	1.4	297.5	21.9	65
2019-07-10	19:00:00	0.7	348.4	21.3	82	0.6	251.3	21	76	0.6	41.4	21.2	76
2019-07-10	20:00:00	1.3	154	22.2	74	1	110.8	22.2	66	1.2	97	21.9	70
2019-07-10	21:00:00	0.9	178.6	21.3	75	1.1	148.9	21.5	65	0.8	114.5	21.4	68
2019-07-10	22:00:00	0.8	177.9	20.9	75	0.9	152.2	21.1	66	0.7	108.9	21.1	69
2019-07-10	23:00:00	0.8	135.2	20.3	76	0.7	121.1	20.6	67	0.7	103.9	20.8	68
2019-07-11	00:00:00	0.6	135.1	19.9	75	0.6	153.3	20.2	67	0.5	83.6	20.3	70
2019-07-11	01:00:00	0.7	150.8	19.4	77	0.5	104.5	19.6	70	0.6	107.1	19.8	70
2019-07-11	02:00:00	0.8	134.2	19	80	0.5	117.6	19.2	72	0.5	79.6	19.3	74
2019-07-11	03:00:00	0.6	146.3	18.7	82	0.4	121.8	19	74	0.5	90.3	19	76
2019-07-11	04:00:00	0.6	186.4	18.4	86	1.1	154.4	18.4	78	0.8	112.2	18.5	79
2019-07-11	05:00:00	0.5	170.3	18	88	0.8	155.6	18.1	80	0.7	114.4	18.1	81
2019-07-11	06:00:00	0.7	198.2	17.8	89	1.2	155.1	17.9	81	0.7	114.3	17.9	82
2019-07-11	07:00:00	0.7	178.1	18.3	88	1	150.4	18.2	80	0.8	108.6	18.1	81
2019-07-11	08:00:00	1.4	201.8	19.4	85	1.2	169.1	19.1	78	1.1	111.4	19.3	78
2019-07-11	09:00:00	1.5	216.3	20.8	81	1.8	174.4	19.8	77	1.3	108.9	20.4	75
2019-07-11	10:00:00	1.4	189	22.4	74	1.8	182.1	21.4	72	1.1	137.9	22	71
2019-07-11	11:00:00	1.8	220.2	23.8	70	1.6	178	23	66	1.4	122.3	23.6	64
2019-07-11	12:00:00	2.6	226	24.5	64	2.4	186.5	24.2	59	1.2	162.8	25.1	58
2019-07-11	13:00:00	2.3	216.1	25.9	56	2.6	210	25.2	54	1.4	129.1	25.7	53
2019-07-11	14:00:00	2	248.4	26.6	51	1.4	240.6	27.2	44	1.4	285.6	27.1	45
2019-07-11	15:00:00	3.3	116.5	26.7	56	1.4	164.8	27	46	2.2	64.9	26.9	50
2019-07-11	16:00:00	2.8	123.5	27.1	55	1.3	94.2	26.8	49	1.8	74.4	26.9	51
2019-07-11	17:00:00	2	150.1	27.7	52	1.5	86.8	27.3	49	2	102.8	27.4	49
2019-07-11	18:00:00	1.4	187.4	27.6	49	1.8	166.8	26.8	50	1.3	90.5	27	48
2019-07-11	19:00:00	2.1	201.1	26.4	54	2.6	178	25.4	54	1.2	112.2	26	53
2019-07-11	20:00:00	2.5	224.4	25	60	1.6	172.4	24.5	55	1.1	104.5	24.8	55
2019-07-11	21:00:00	1.6	213.9	24.3	62	1.7	166.1	23.7	58	1.1	112.7	23.9	58
2019-07-11	22:00:00	0.9	190.3	23.5	65	1.1	170.8	23.1	62	0.7	113.4	23.4	61
2019-07-11	23:00:00	1	208.7	22.7	68	1.1	164.5	22.3	65	0.8	105.4	22.7	64
2019-07-12	00:00:00	0.9	216.9	21.9	72	1.4	195.6	21.6	68	0.6	139.4	22	66
2019-07-12	01:00:00	0.7	145.7	21.2	72	0.5	89.3	21	70	0.7	77.3	21.4	68
2019-07-12	02:00:00	0.6	134.8	20.5	73	0.6	124.8	20.5	69	0.5	76.7	20.7	70
2019-07-12	03:00:00	0.6	348	19.8	78	0.6	167.5	20.2	70	0.5	301	20	73
2019-07-12	04:00:00	0.4	352.9	18.8	85	0.7	182.8	19.6	74	0.4	247	18.9	78
2019-07-12	05:00:00	0.9	12.8	18.1	88	0.4	72.2	19.1	76	0.5	74.2	19.2	77
2019-07-12	06:00:00	0.7	12.5	17.3	92	0.4	67.9	18.9	78	0.6	296.9	18	82
2019-07-12	07:00:00	0.7	1.8	17.8	90	0.4	46.8	19.9	76	0.7	314.4	17.9	83
2019-07-12	08:00:00	0.6	336.9	20.2	82	0.7	49	21	72	0.7	345.8	20	76
2019-07-12	09:00:00	0.8	178.1	23.6	69	0.9	176.3	22.4	67	0.8	79.3	22.8	66
2019-07-12	10:00:00	1.2	166.5	25	63	1	158.8	24.1	61	1	89.8	24.3	61
2019-07-12	11:00:00	1.6	128	26.1	55	1.4	129	25.7	52	1.4	88.9	25.9	53
2019-07-12	12:00:00	1.7	121.9	26.7	51	1.6	132.8	26.6	46	1.6	84.4	26.6	48
2019-07-12	13:00:00	1.6	128.9	27.9	45	1.3	56.7	27.9	42	1.3	69.2	27.8	42
2019-07-12	14:00:00	2	92.8	28.9	40	1.5	110.3	28.6	38	1.6	46.5	28.7	37
2019-07-12	15:00:00	1.7	114.2	29.7	38	1.6	60.3	29.5	32	1.4	36.7	29.7	34
2019-07-12	16:00:00	1.8	76.3	30.1	35	1.6	64.5	30.1	31	1.2	358.1	30.1	32
2019-07-12	17:00:00	1.9	85.6	31.2	30	1.9	48.2	30.5	28	1.8	24	30.7	28
2019-07-12	18:00:00	2.4	112	30.8	30	1.7	67.1	30.5	27	1.7	47.9	30.8	27
2019-07-12	19:00:00	1.8	88.9	30.7	30	1.8	70.4	30.2	28	1.6	44.5	30.4	28
2019-07-12	20:00:00	1.6	120.5	30	29	1.5	77.6	29.6	26	1.2	72.3	29.7	27
2019-07-12	21:00:00	1.3	137.3	28.6	32	0.6	114.8	28.4	28	0.7	83.8	28.3	30
2019-07-12	22:00:00	0.9	102.8	27.5	35	0.4	191.5	26.8	35	0.5	89.3	27.4	31
2019-07-12	23:00:00	0.6	7.5	24.8	45	0.5	252.2	24.5	46	0.5	294.1	25.1	41
2019-07-13	00:00:00	0.7	10.1	22.9	54	0.5	322	23.2	51	0.8	296.4	23.3	48
2019-07-13	01:00:00	0.7	346.7	21.6	60	0.7	299.2	22.1	54	0.8	291.2	21.8	54
2019-07-13	02:00:00	0.9	3.2	20.7	62	0.6	285.4	21.3	57	0.8	327.6	21.2	54
2019-07-13	03:00:00	0.8	0.2	19.8	64	0.8	317.3	20.6	58	0.6	322.9	20.6	56
2019-07-13	04:00:00	1.1	1.9	19.1	67	0.3	341.9	20.3	63	0.9	333.2	19.6	62
2019-07-13	05:00:00	1.3	359.4	18.1	71	0.8	37	19.5	63	1.3	319.4	18.2	67
2019-07-13	06:00:00	0.8	355.4	17.4	77	0.6	305.4	18.4	67	0.8	294.3	17.5	71
2019-07-13	07:00:00	0.7	12.9	18	75	0.5	262.6	19.2	67	0.5	327.5	18.2	69
2019-07-13	08:00:00	0.5	44.9	20.8	65	0.4	18.9	21.7	61	0.4	348.5	21.1	60
2019-07-13	09:00:00	0.7	255.2	24.6	56	0.7	185.7	23.9	54	0.8	97.4	24	54
2019-07-13	10:00:00	1.4	248.2	25.6	53	1.3	224.6	25.1	50	0.9	100.2	25.9	49
2019-07-13	11:00:00	1	283.9	28	45	0.9	162.4	27.9	41	1	29.7	27.8	42
2019-07-13	12:00:00	1.6	333.6	29.6	37	1.2	110.9	29.5	33	1.2	333.3	29.6	34
2019-07-13	13:00:00	1.6	239.4	30.9	34	1.6	184.2	30.4	30	1.6	2.8	30.7	31
2019-07-13	14:00:00	1.8	275.1	31.3	34	1.7	14.3	31.2	30	1.2	100.5	31.5	30
2019-07-13	15:00:00	1.4	120.1	31.4	33	1.3	137.9	31.7	29	1.2	43.7	31.5	30
2019-07-13	16:00:00	2.7	91.3	30.3	34	2	32.3	29.6	34	2	30.2	30.2	32
2019-07-13	17:00:00	1.8	146.7	30.4	34	2	113.9	29	35	1.5	99.3	29.9	32
2019-07-13	18:00:00	2.2	230.1	29.9	38	1.4	201.3	28.4	37	0.9	160.3	30.1	34
2019-07-13	19:00:00	1.1	274.5	29.4	38	1.5	291	28.6	40	0.8	271.3	29.5	35
2019-07-13	20:00:00	1.3	316.6	28	43	2	282.5	27.2	43	2.3	270.8	27.7	40
2019-07-13	21:00:00	1	12.5	27.3	42	1.2	276.3	26.6	40	1.1	292	27	40
2019-07-13	22:00:00	1.4	18.1	26	47	1.3	353	25.7	42	1.4	338.6	25.7	45
2019-07-13	23:00:00	1.4	2.4	25.1	48	1.4	19.2	25.1	44	1	317.6	24.8	46
2019-07-14	00:00:00	0.6	36.2	24.6	48	0.6	69.7	24.8	44	0.4	35.1	24.6	44
2019-07-14	01:00:00	0.9	321.3	23.9	51	—	—	—	—	0.7	257.1	23.9	48
2019-07-14	02:00:00	1	325	23.2	54	—	—	—	—	0.6	266.8	23.3	51
2019-07-14	03:00:00	1.1	4.9	22.3	57	1.3	54.2	22.2	60	0.8	333.7	22.9	52
2019-07-14	04:00:00	0.9	4.5	21.8	59	1	49.9	22.3	54	0.7	329.8	21.9	56
2019-07-14	05:00:00	1.4	360	20.9	64	0.9	324.2	21.4	57	1.1	303.5	20.7	61
2019-07-14	06:00:00	1.1	4.5	19.1	74	1.2	331.3	20.1	64	1	298.7	19.4	67
2019-07-14	07:00:00	1.5	358.7	18.7	76	1	16.9	20.2	64	1.1	324.9	18.9	68
2019-07-14	08:00:00	0.7	276.4	21.4	68	0.4	212.6	23	56	0.5	287.8	21.5	61
2019-07-14	09:00:00	1.3	222.9	24.7	56	1	154.5	24.3	51	1.2	99.6	24.4	52
2019-07-14	10:00:00	1.5	236.7	26.4	51	1.7	213.7	25.5	48	1	124.3	26.4	47
2019-07-14	11:00:00	1.4	236.7	28.4	43	1.2	190.8	27.8	42	0.9	119.2	28.6	39
2019-07-14	12:00:00	1.8	240.3	30	38	1.6	197.7	29.6	34	1.1	101.1	30	34
2019-07-14	13:00:00	2	244.8	31.1	36	1.9	223.5	30.8	32	1.3	145.5	31.4	31
2019-07-14	14:00:00	2.5	269.5	31.7	34	1.7	211.1	31.4	28	1.3	243.4	32.6	28
2019-07-14	15:00:00	2	274.6	32.7	31	1.2	232.6	32.2	26	1.6	248.3	32.9	26
2019-07-14	16:00:00	1.5	254.4	33.1	28	1	83.5	32.9	25	1.4	262.3	33.1	24
2019-07-14	17:00:00	1.6	232	32.9	29	1.2	182.5	32.6	25	1	108.3	32.9	24
2019-07-14	18:00:00	1.6	226.6	33.1	30	2.2	219	32.1	29	1.4	243.9	33.1	28
2019-07-14	19:00:00	3.2	270.9	30.6	41	4.1	242.5	30.4	37	3.2	254.5	30.8	37
2019-07-14	20:00:00	2.2	251.8	29.9	41	2	237.4	29.6	37	2	255.3	29.8	37
2019-07-14	21:00:00	1.4	261.9	29	42	1	228.9	28.8	38	1	244.8	28.9	38
2019-07-14	22:00:00	1.3	302.8	28.5	43	0.7	252.9	27.9	40	1	283.1	28.1	40
2019-07-14	23:00:00	1.3	244.8	27.6	47	1.3	197.9	27.6	41	0.5	174.1	27.6	43
2019-07-15	00:00:00	2.5	221.9	27.4	47	1.8	195.1	27	43	0.6	135.9	27.4	44
2019-07-15	01:00:00	1.3	236.2	26.4	50	1.8	209.5	26	46	0.5	220	26.3	47
2019-07-15	02:00:00	1.6	232.1	25.7	52	0.9	211	25.2	48	0.5	239.9	25.3	50
2019-07-15	03:00:00	1.7	220.6	25.1	52	1.1	196.6	24.5	49	0.6	142.8	25	50
2019-07-15	04:00:00	1.5	226.9	24.3	54	1	181.5	23.8	51	0.8	99.8	24.2	51
2019-07-15	05:00:00	1.2	226.7	23.6	57	0.7	180	23.2	54	0.7	113.9	23.6	54
2019-07-15	06:00:00	1.2	222.5	23.4	59	0.4	178.6	23.1	56	0.7	109.7	23.3	56
2019-07-15	07:00:00	1.5	234	23.3	61	1.2	186.2	23	58	0.8	99.2	23.2	58
2019-07-15	08:00:00	1.8	230.9	23.5	62	1.2	221.3	23.1	59	0.6	244.4	23.7	58
2019-07-15	09:00:00	1.9	251.9	24	62	1.6	232.2	23.5	60	1	217.2	24.1	58
2019-07-15	10:00:00	1.4	232.1	24.4	62	0.7	237.5	24.2	58	0.6	155.9	24.5	57
2019-07-15	11:00:00	0.7	269.7	25.6	58	0.7	20.8	25.4	54	0.5	67.3	25.7	53
2019-07-15	12:00:00	0.9	210.4	26.7	54	0.7	163.6	26.7	51	0.8	56.6	26.5	51
2019-07-15	13:00:00	1.2	184.2	28.3	51	0.9	107.7	28.2	48	1	66.9	27.9	48
2019-07-15	14:00:00	1.6	259.5	29.1	49	1	40.1	29.4	44	1.1	45.7	29.1	44
2019-07-15	15:00:00	1.8	220.6	29.8	44	2.4	210.9	29	42	1.6	122.5	29.4	43
2019-07-15	16:00:00	3.6	317.7	21	88	4.3	283.5	20.3	82	4.6	270.1	19.4	89
2019-07-15	17:00:00	2.1	31.3	20.9	91	2.2	18.7	21.3	80	2.6	331.9	20.6	91
2019-07-15	18:00:00	2.4	69.4	21.8	81	2.5	52	21.8	76	1.9	2.7	21.4	81
2019-07-15	19:00:00	2.2	14.4	21.8	81	2.5	8.1	21.8	73	2	331.8	21.4	77
2019-07-15	20:00:00	2.1	91.6	20.2	96	2.7	70.9	19.4	91	1.5	24.5	19.7	90
2019-07-15	21:00:00	1.7	69.2	19.7	100	1.9	57.2	19.6	94	1.4	359.8	19.3	97
2019-07-15	22:00:00	1.3	52.8	19.8	100	1.4	49.3	20	90	1	346.1	19.6	94
2019-07-15	23:00:00	1.7	66.6	19.8	99	1.6	61.2	19.9	88	1.2	20.4	19.6	92
2019-07-16	00:00:00	1.7	115.5	19.6	99	1.7	72.7	19.8	88	1.3	59.5	19.6	91
2019-07-16	01:00:00	1.1	156.2	19.6	98	1	108.7	19.7	88	1.2	96.3	19.7	90
2019-07-16	02:00:00	1.2	356.2	19.4	100	0.9	292.4	19.6	90	0.9	357.6	19.6	90
2019-07-16	03:00:00	1	6.1	19.2	100	0.5	35.3	19.7	90	0.9	342.8	19.3	92
2019-07-16	04:00:00	0.7	8.1	19.2	100	0.7	43.3	19.4	91	0.9	334.8	19.2	92
2019-07-16	05:00:00	1.1	38.1	18.8	100	1	59.8	18.9	93	0.9	11	18.7	96
2019-07-16	06:00:00	2.1	111.5	18.7	100	1.8	74	18.5	96	1.2	52.7	18.6	98
2019-07-16	07:00:00	2	132.3	18.9	100	1	77.7	18.7	95	0.8	70.8	18.8	96
2019-07-16	08:00:00	0.8	182.3	18.9	100	0.7	87.6	19	93	0.9	68.3	19	95
2019-07-16	09:00:00	1	190.1	19.2	100	0.9	107.4	19.2	93	0.9	77.5	19.1	95
2019-07-16	10:00:00	1.2	1.3	18.9	100	1.2	329.3	18.8	96	1.2	320.1	18.8	98
2019-07-16	11:00:00	1.2	342.1	18.6	100	0.9	352.8	18.5	99	0.8	332	18.5	100
2019-07-16	12:00:00	1.1	102.3	19.5	100	1	63.1	19.9	96	1	61.4	19.6	98
2019-07-16	13:00:00	1.5	202.7	22.1	96	1.3	143.9	22.2	86	1	100.1	21.9	88
2019-07-16	14:00:00	3.4	225.3	23.6	85	2.5	197.6	23.4	78	1.5	162	23.8	78
2019-07-16	15:00:00	3.5	218.4	23.8	80	2.8	171.5	23.4	75	1.5	135.6	23.8	74
2019-07-16	16:00:00	2.5	246.9	22	81	1.7	217.7	21.4	79	1.3	214.3	21.7	78
2019-07-16	17:00:00	0.8	322.5	21.2	88	1.2	243.7	20.6	84	1	254.5	21	81
2019-07-16	18:00:00	2.4	217.8	19.8	99	1.8	187.6	19.8	89	0.9	106.7	19.9	91
2019-07-16	19:00:00	2.8	222.3	19.6	99	2.6	162.6	19.2	92	1.2	113.2	19.6	91
2019-07-16	20:00:00	2.5	219.5	19	100	2.2	169.7	18.6	97	1.1	111.4	18.8	97
2019-07-16	21:00:00	1.2	200.8	18.9	100	1.2	164.5	19	94	0.8	94.5	18.9	96
2019-07-16	22:00:00	0.8	216.6	19.3	100	0.4	192.2	19.6	90	0.4	113.7	19.4	91
2019-07-16	23:00:00	1.5	224.6	19.7	96	0.7	204.6	19.9	88	0.4	118.2	19.8	89
2019-07-17	00:00:00	0.7	219.7	19.8	96	0.6	208.8	19.8	88	0.5	116.7	19.7	89
2019-07-17	01:00:00	0.3	264.3	19.8	96	0.3	219.1	19.9	88	0.3	72.4	20.1	88
2019-07-17	02:00:00	0.4	195	19.8	96	0.5	161.7	20.1	88	0.5	97.7	20	88
2019-07-17	03:00:00	0.6	205.9	19.9	96	0.9	163.9	19.7	89	0.6	105.2	19.9	89
2019-07-17	04:00:00	0.6	167.2	19.6	98	1.1	165.8	19.5	90	0.6	103.5	19.6	90
2019-07-17	05:00:00	1	219.8	19.2	100	1	171	19.2	92	0.8	136.9	19.1	93
2019-07-17	06:00:00	1.3	218	19.1	100	1.1	215.8	19.2	92	0.7	113.9	19.2	93
2019-07-17	07:00:00	1.6	225.8	19.5	100	1.5	207.8	19.3	94	0.8	129.8	19.5	93
2019-07-17	08:00:00	2.1	214.5	20.4	99	2.1	197.9	19.9	92	0.9	155.5	20.6	89
2019-07-17	09:00:00	2.7	218.1	21.6	90	2.2	204.5	21.3	83	1.1	164.5	22	81
2019-07-17	10:00:00	3.1	223.3	22.8	82	2.6	203.6	22.4	76	1.1	165.7	22.8	74
2019-07-17	11:00:00	2.8	227.9	23.8	78	2.9	195.2	23.3	73	1.3	156.8	23.6	72
2019-07-17	12:00:00	2.9	229.1	24.6	74	2.6	205.1	24.3	68	1.2	162.4	24.7	68
2019-07-17	13:00:00	2.6	225.2	25.5	70	2.3	188.9	24.6	66	1.4	145.4	25.4	64
2019-07-17	14:00:00	2.6	225.9	25.1	71	2.4	208.1	24.7	66	1.3	134.8	25.3	64
2019-07-17	15:00:00	2.5	230	25.8	68	2.4	204.9	25.2	64	1.4	126.7	26.1	61
2019-07-17	16:00:00	2.4	229.7	26.8	65	2.2	181.3	25.5	63	1.4	147.5	26.7	60
2019-07-17	17:00:00	2.9	230.9	26.9	64	3	208.1	26.3	60	1.3	165.4	27.4	57
2019-07-17	18:00:00	2.4	229.7	27	61	2.8	212.9	26.2	60	1.2	225.7	27.2	58
2019-07-17	19:00:00	2.4	246.7	26.6	64	2.6	227.6	26.2	60	1	221.3	27	58
2019-07-17	20:00:00	2.8	236.5	26.2	66	2.3	219.8	25.8	62	1	184.7	26.2	61
2019-07-17	21:00:00	2.2	238.2	25.2	71	2.2	220.7	24.5	68	0.8	234.9	25	66
2019-07-17	22:00:00	2.3	240.4	24.2	76	2.4	212.3	23.6	71	0.9	216.1	23.9	71
2019-07-17	23:00:00	2.2	238.8	23.5	79	2.1	215.1	22.9	74	0.8	220.9	23.2	73
2019-07-18	00:00:00	2.1	238	22.8	82	1.7	207.3	22.4	77	0.3	222.8	22.7	76
2019-07-18	01:00:00	1.6	223.6	22.3	84	1.4	191.1	21.9	78	0.6	149.5	22.2	78
2019-07-18	02:00:00	1	221.3	21.5	88	1.3	188.2	21.3	81	0.6	109.4	21.4	82
2019-07-18	03:00:00	0.7	218.4	20.9	91	1	195.2	20.9	83	0.5	115.6	21	83
2019-07-18	04:00:00	0.5	205.6	20.3	93	1.1	182.7	20.3	85	0.9	99.3	20.4	86
2019-07-18	05:00:00	0.5	189.9	19.7	96	1.1	182.5	19.7	88	0.8	93.8	19.8	88
2019-07-18	06:00:00	0.7	138.9	19.3	99	0.8	178.9	19.4	90	0.9	98.3	19.4	90
2019-07-18	07:00:00	0.8	171.4	19.7	97	0.6	81.6	19.9	87	0.7	94	20	88
2019-07-18	08:00:00	1.3	207	21.2	90	1.3	136.9	20.5	84	1	125.3	20.9	83
2019-07-18	09:00:00	1.9	214.5	22.6	81	1.8	161.7	21.8	77	1.3	109.9	22.4	75
2019-07-18	10:00:00	3.1	225.9	24.1	69	2.6	188.2	23.3	66	1.6	126.7	24.1	64
2019-07-18	11:00:00	3.9	228.9	25	66	3.5	204	24.7	59	1.6	155.9	25.4	59
2019-07-18	12:00:00	3.3	230.8	25.8	63	3.2	210.4	25.1	59	1.5	211.5	26.3	56
2019-07-18	13:00:00	4.2	240.3	26.1	63	4.2	213.3	25.7	58	1.8	206.4	26.6	56
2019-07-18	14:00:00	4.4	230.9	25.7	67	4.5	202.2	24.3	66	2	206.9	26.2	60
2019-07-18	15:00:00	3.1	220.5	24.1	79	3.2	180.9	23.6	74	1.9	130.2	24.4	71
2019-07-18	16:00:00	1.9	177.1	24.3	81	1.9	176.8	24.5	71	1.5	101.2	24.3	74
2019-07-18	17:00:00	1.2	236.2	24.5	80	1.4	185.6	24.4	71	0.9	124.8	24.6	72
2019-07-18	18:00:00	1.6	273.4	24.1	81	1	203.4	24.2	74	0.7	220.8	24.5	73
2019-07-18	19:00:00	2.3	232.5	25	76	1.5	193.7	24.8	71	0.9	177.4	25.2	69
2019-07-18	20:00:00	2.6	226.9	25.2	74	1.6	193.3	24.9	68	1.1	163.4	25.2	68
2019-07-18	21:00:00	2.4	231.7	25.2	72	1.8	200.9	24.8	67	0.8	194.3	25	66
2019-07-18	22:00:00	1.2	217.8	24.6	75	1.4	165.3	24.4	68	1	100.8	24.6	68
2019-07-18	23:00:00	1.5	225.2	24.2	77	1.5	203.6	23.9	71	0.6	119.1	24.1	71
2019-07-19	00:00:00	2.4	226	23.9	80	2.5	206.9	23.5	75	1	195.1	23.8	73
2019-07-19	01:00:00	2.8	233.7	23.6	83	1.9	207.2	23.2	77	0.8	192.2	23.4	77
2019-07-19	02:00:00	1.3	222.2	23	86	1.4	183.8	22.7	79	0.8	110.9	22.9	79
2019-07-19	03:00:00	1.6	222.3	22.5	90	2.5	201.1	22.3	82	0.9	111.9	22.5	82
2019-07-19	04:00:00	1.8	225	22.5	90	2.5	204.6	22.2	83	0.8	201.5	22.4	82
2019-07-19	05:00:00	2	219.6	22.4	91	1.8	191.4	22	84	0.8	158.6	22.3	82
2019-07-19	06:00:00	1.6	224.2	22	93	1.4	193.2	21.8	85	0.7	116	22	84
2019-07-19	07:00:00	2.1	216.4	21.7	96	1.9	187.6	21.5	88	0.9	131	21.8	87
2019-07-19	08:00:00	2.4	223.1	21.5	98	2.4	191.2	21.2	90	1.1	136.3	21.6	89
2019-07-19	09:00:00	2.2	217.7	22	96	2.2	203.8	21.6	90	1.2	139.3	22.4	85
2019-07-19	10:00:00	2.3	222.6	23	92	2.4	199	22.6	85	1	154	23.3	82
2019-07-19	11:00:00	2.1	230	23.6	89	2.2	216	23.6	80	0.9	191.2	24.1	78
2019-07-19	12:00:00	1.9	263.2	24.1	85	1.9	228.6	24	77	1.2	263.8	24.4	75
2019-07-19	13:00:00	1.6	344.1	23.6	89	1.1	308.4	23.8	78	1.2	312.3	23.9	80
2019-07-19	14:00:00	2	355.5	24.7	80	1.2	18.7	24.9	70	1.5	333.6	25.1	69
2019-07-19	15:00:00	2.2	0.8	25.6	70	1.5	353.8	26	62	1.9	315	25.7	64
2019-07-19	16:00:00	1.9	337.3	26.5	61	1.4	337.6	26.6	55	1.1	27.8	27.1	53
2019-07-19	17:00:00	1.2	320.6	27.1	58	1.3	225.2	27	54	1.1	296.9	27.3	54
2019-07-19	18:00:00	1.8	324.9	26.7	63	1.5	305.3	26.6	58	1.8	284.5	26.7	59
2019-07-19	19:00:00	1.8	345.8	26.1	66	1.7	295.2	25.9	62	1.5	286.9	26.1	61
2019-07-19	20:00:00	1.4	356.6	25.7	66	1.5	302	25.4	63	1.2	292.1	25.7	61
2019-07-19	21:00:00	0.6	330.7	25.2	66	0.7	299.2	25	62	0.9	264.3	25.2	61
2019-07-19	22:00:00	0.7	297	25	67	0.5	254.5	24.6	65	0.7	248.2	24.9	62
2019-07-19	23:00:00	0.7	334.1	24.2	73	0.4	242.7	24.1	69	0.5	265.2	24.5	63
2019-07-20	00:00:00	0.3	188.4	23.6	77	0.6	202.5	23.3	73	0.4	116.6	23.8	69
2019-07-20	01:00:00	0.3	223.6	22.7	82	0.6	242.7	22.6	80	0.2	151.8	23.1	75
2019-07-20	02:00:00	0.7	321.6	22	87	0.2	230.2	21.9	84	0.3	72.9	22.6	77
2019-07-20	03:00:00	0.4	229	21.6	90	0.8	222.1	21.1	86	0.1	213.9	22.1	82
2019-07-20	04:00:00	0.6	355.2	20.9	93	0.6	251.5	20.7	89	0.3	260.3	21.5	85
2019-07-20	05:00:00	0.8	5.1	20	96	0.4	285.6	20.4	89	0.7	313.8	20.4	86
2019-07-20	06:00:00	0.8	344	19.5	99	0.4	358.5	20.4	89	0.6	306	19.7	89
2019-07-20	07:00:00	0.7	351.4	19.8	98	0.6	306.1	20.4	87	0.4	291.8	20	89
2019-07-20	08:00:00	0.7	310.1	20.6	96	0.4	238.6	21.2	85	0.4	327.1	21.1	84
2019-07-20	09:00:00	0.7	224.4	24.4	80	0.7	138.8	23.2	77	0.7	71.5	24	72
2019-07-20	10:00:00	1	216.1	25.7	69	0.9	204.2	25.4	65	0.7	148.9	25.5	65
2019-07-20	11:00:00	1.3	255.9	27.1	62	1.3	207.9	26.6	59	1	129.8	27.1	59
2019-07-20	12:00:00	1.5	247.1	28.2	57	1.3	195.6	28	52	1	219.6	28.4	52
2019-07-20	13:00:00	1.8	216.9	29.4	51	1.4	203.2	29.1	46	1.5	146.7	29.5	46
2019-07-20	14:00:00	2	242	30.4	46	1.5	215.9	30.2	41	1.2	238.2	30.6	41
2019-07-20	15:00:00	1.4	282.8	31.2	43	1.2	258.4	31.4	36	1.2	240.3	31.4	40
2019-07-20	16:00:00	1.5	273	30.7	44	1.2	197.3	32.1	35	0.9	179.4	32.3	38
2019-07-20	17:00:00	1.4	300.5	32	40	1.8	222.4	31.9	35	1.1	62.5	32.1	36
2019-07-20	18:00:00	1.5	245.7	32.6	39	1.7	238.6	32	35	1	236.2	32.7	35
2019-07-20	19:00:00	2.1	230.2	32.1	41	1.8	175.2	31.4	36	1	169.3	32.3	36
2019-07-20	20:00:00	1.2	197.4	31.1	46	1.6	165.5	30.6	42	1	111.9	30.9	42
2019-07-20	21:00:00	0.7	178.4	29.7	51	1	157	29.5	46	0.8	106.9	29.6	47
2019-07-20	22:00:00	0.7	182.9	28.5	54	0.7	160.5	28.6	49	0.6	118.6	28.9	48
2019-07-20	23:00:00	0.8	136.3	27.6	57	0.5	177.1	27.7	52	0.6	116.2	28.1	51
2019-07-21	00:00:00	0.8	144	26.9	59	0.6	146.3	26.8	55	0.8	106.2	27.2	54
2019-07-21	01:00:00	0.3	163.1	26.2	61	0.9	168.1	26.4	56	0.6	113.6	26.6	55
2019-07-21	02:00:00	1.2	219.7	25.9	62	1.4	169	25.9	57	0.7	110.1	25.9	58
2019-07-21	03:00:00	0.6	178.7	25	65	0.8	163.3	25	61	0.6	104.4	25.1	61
2019-07-21	04:00:00	0.4	160.5	24.2	70	0.4	181.6	24.3	65	0.7	94.3	24.5	65
2019-07-21	05:00:00	0.6	157.3	23.5	74	0.6	177.1	23.6	69	0.6	89.2	23.8	68
2019-07-21	06:00:00	0.7	196	23	78	1.2	158.4	23	72	0.7	112.8	23.4	71
2019-07-21	07:00:00	0.8	199.3	23.2	80	0.6	139.8	23.1	73	0.7	107.2	23.1	74
2019-07-21	08:00:00	0.9	196.8	24.9	77	1.1	147	24	73	0.8	125.9	24.5	72
2019-07-21	09:00:00	1.8	216.8	26.1	75	1.8	165.9	24.8	74	1.2	112.7	25.7	71
2019-07-21	10:00:00	2.3	232.2	27	75	1.8	172.5	26.2	70	1.3	104.5	27	68
2019-07-21	11:00:00	2.6	231.3	27.7	71	2.1	163.2	27	67	0.8	145.8	28.2	63
2019-07-21	12:00:00	2.6	232.1	28.5	66	1.7	170.3	28.1	62	1.1	144	28.9	59
2019-07-21	13:00:00	2	229.2	29	62	1.7	189	28.6	59	1.2	125.4	29	58
2019-07-21	14:00:00	1.6	211.4	29.3	59	1.4	176.6	28.9	56	1	120.4	29.1	56
2019-07-21	15:00:00	1.5	207.2	29.8	57	1.5	156.9	29.4	52	1.1	116.7	29.5	52
2019-07-21	16:00:00	1.3	139.8	29.7	56	1	89.2	29.4	53	1.3	88.2	29.4	53
2019-07-21	17:00:00	2	127.5	29.7	58	1.3	72.8	29.4	53	1.3	63.7	29.4	54
2019-07-21	18:00:00	1.8	132.7	29.5	53	1.1	72.3	29	51	1	69.1	29.2	50
2019-07-21	19:00:00	1.5	121.5	29.1	54	1.1	77.2	28.7	50	0.8	71.1	28.9	50
2019-07-21	20:00:00	1.1	86.6	28.3	60	0.9	56.9	28.1	54	0.8	17.4	28.1	57
2019-07-21	21:00:00	2.9	306.5	25.4	80	2.2	252.3	25.4	71	1.7	275.2	25.3	74
2019-07-21	22:00:00	2.1	245.7	21.4	100	2.1	227.9	21.2	94	1.3	243.4	21.2	97
2019-07-21	23:00:00	2.4	238.1	21	100	2.4	212.6	20.9	97	0.9	212.6	20.8	100
2019-07-22	00:00:00	1	130	20.7	100	1.1	94.9	20.5	96	0.7	80	20.6	99
2019-07-22	01:00:00	1.4	123.6	20.6	100	1.2	80.9	20.6	97	1	72.3	20.7	98
2019-07-22	02:00:00	1.3	131.1	20	100	1.1	74.1	20	98	1.3	71.7	20	99
2019-07-22	03:00:00	1.2	135.8	19.8	100	1	70.9	19.8	100	1.2	65.8	19.8	100
2019-07-22	04:00:00	1.9	174	19.3	100	1.4	96.3	19.1	98	1.9	99.1	19.3	99
2019-07-22	05:00:00	2.1	158.4	19.1	100	1.7	95.5	18.9	100	2.1	92.9	19	100
2019-07-22	06:00:00	1.9	169.5	19	100	1.3	115.4	19	100	1.5	90.1	18.9	100
2019-07-22	07:00:00	2.5	222.1	19.4	100	2.7	170.8	19.6	100	1.2	140.1	19.4	100
2019-07-22	08:00:00	3.2	229.7	20.2	100	3.3	198.8	20.3	100	1.2	170.9	20.1	100
2019-07-22	09:00:00	2.9	240.2	20.6	100	2.8	223.4	20.7	99	1.5	233.8	20.7	100
2019-07-22	10:00:00	2.3	281.6	21.3	100	2.6	242.4	21.7	91	2	254.9	21.6	92
2019-07-22	11:00:00	2.9	346.4	21.6	96	3.5	298.4	21.7	85	2.8	287	21.8	86
2019-07-22	12:00:00	4	349.1	23	85	3.5	301.7	23	77	3.2	288.9	23.1	78
2019-07-22	13:00:00	3.5	348	22.9	85	3.2	300.8	22.9	76	3.3	296.6	22.8	78
2019-07-22	14:00:00	3.1	4.4	23.9	78	3	321	24	70	3.4	298.5	24	72
2019-07-22	15:00:00	3.6	0.1	25.2	71	2.9	340.3	25.2	65	2.8	308.6	25.3	66
2019-07-22	16:00:00	2.5	6.1	26.6	67	2.7	322.7	26.5	61	2.7	304.3	26.4	63
2019-07-22	17:00:00	1.9	358.3	27.3	65	1.5	324.1	27.1	59	1.9	300.6	26.9	61
2019-07-22	18:00:00	1.6	319.7	27.6	63	1.3	342.8	27.1	59	1.4	320.5	27.4	59
2019-07-22	19:00:00	1.2	309.2	27.7	62	0.8	331.9	27.7	56	0.8	292.3	27.6	57
2019-07-22	20:00:00	1.2	254.1	27.2	63	0.7	222.6	27	57	0.4	254.6	27.2	59
2019-07-22	21:00:00	1.1	230.1	26	72	1.5	202.2	25.9	65	0.5	158	26.1	65
2019-07-22	22:00:00	1	214.5	24.9	79	1.7	200.6	24.7	72	0.6	182.4	24.9	72
2019-07-22	23:00:00	0.8	182.7	23.5	86	0.8	155.8	23.7	76	0.8	100.4	23.8	76
2019-07-23	00:00:00	0.6	187.3	22.6	90	0.6	135.8	22.8	80	0.6	112.3	22.9	80
2019-07-23	01:00:00	0.6	181.1	22.2	90	0.3	86.4	22.4	80	0.7	74.8	22.4	82
2019-07-23	02:00:00	0.4	205.8	21.8	92	0.5	185.1	22	82	0.4	101.1	22.1	83
2019-07-23	03:00:00	0.6	205	21.2	95	0.6	202.6	21.4	86	0.2	155.5	21.5	86
2019-07-23	04:00:00	0.5	5.4	20.6	98	0.4	234.7	20.7	89	0.1	258.9	21	89
2019-07-23	05:00:00	0.5	347.6	19.8	100	0.8	227.6	20	92	0.2	206.7	20.6	90
[truncated: 954 more rows]

## Sheet: VOCs simpling period (ppbv)
Date	Ethane	Propane	Iso-butane	n-Butane	Iso-pentane	n-Pentane	2,2-Dimethylbutane	2,3-Dimethylbutane	2-Methyl pentane	3-Methyl pentane	n-Hexane	2-Methyl hexane	3-Methyl hexane	n-Heptane	n-Octane	n-Nonane	n-Decane	n-Undecane	Ethene	Propene	Trans-2-butene	Cis-2-butene	1-Butene	1,3-Butadiene	1-Pentene	Trans-2-pentene	Isoprene	Cis-2-pentene	1-Hexene	Ethyne	Methyl bromide	Ethyl chloride	1,1-Dichloroethene	Dichloromethane	1,1-Dichloroethane	Cis-1,2-dichloroethene	Chloroform	1,2-Dichloroethane	Trichloroethylene	1,2-Dichloropropane	1,1,2-Trichloroethane	Perchloroethylene	p-Dichlorobenzene	o-Dichlorobenzene	Benzene	Toluene	Ethyl benzene	p-Xylene	o-Xylene
2019-07-07 00:00:30	2.1315	0.561882	3.55851	0.830487	1.2811	0.346497	0.0302639	0.0959976	0.0932566	0.0584764	0.324185	0.0200849	0.0199007	0.0363868	0.208504	0.0160591	0.0206042	0.0187574	0.870112	0.0242649	0.000194536	0.0694387	1.93605	0.000980159	0.0937926	0.0133639	0.0414016	0.0497551	0.43889	0.676541	0.00563453	0.005667	0.00106145	0.167762	0.0169064	0.0223515	0.589031	0	0	0.0127793	0.365193	0	0.177842	0	0.0321124	0.0153037	0.516642	0.624324	0.244709
2019-07-07 01:00:30	3.34897	1.07227	3.19818	0.911776	1.25015	0.271676	0.0203154	0.00846271	0.00768665	0.0392174	0.181857	0.0203671	0.0192814	0.0345189	0.206584	0.0141092	0.0158472	0.011209	1.19073	0.000544372	0.000490084	0.000358631	1.77102	0.00151134	0.00605077	0.014088	0.0240101	0.0594859	0.336589	0.358202	0.00495933	0.00254345	0.000654161	0.101591	0.012959	0.00409613	0.414513	0	0	0.0734057	0.350575	0	0.127584	0	0.0243512	0.0108783	0.475824	0.514324	0.177066
2019-07-07 02:00:29	6.92788	1.92983	3.21637	1.26707	1.08055	0.29953	0.020526	0.0994604	0.0951211	0.06922	0.481811	0.0360166	0.0396083	0.0545007	0.216856	0.0282425	0.0215512	0.0218487	3.41584	0.619591	0.0347899	0.00120029	1.95958	0.00753398	0.015349	0.0246693	0.0276694	0.0158188	0.578964	4.41978	0.00439601	0.00244882	0.000292459	0.10507	0.0322352	0.00249388	0.192768	0	0	0.0179637	0.229228	0	0.333102	0	0.0274676	0.0113274	0.923043	0.694106	0.285291
2019-07-07 03:00:29	8.90383	3.00914	3.53473	1.75164	2.41453	0.645596	0.0293226	0.140636	0.150641	0.106582	0.691466	0.0484743	0.0490018	0.060226	0.216683	0.0281691	0.0227632	0.0206121	2.51317	0.767886	0.0640753	0.0647906	2.36812	0.00851573	0.0308628	0.0582547	0.0187266	0.0321323	0.755099	3.1327	0.00600108	0.00355843	0.000832639	0.162027	0.0226551	0.00250551	0.963005	0	0	0.0129082	0.370083	0	0.25647	0	0.0238858	0.00829508	0.845388	0.855131	0.191742
2019-07-07 04:00:29	7.59373	2.23835	3.25476	1.46493	2.3517	0.714954	0.0293833	0.150702	0.146306	0.108261	0.350453	0.0297721	0.0315374	0.0480815	0.21522	0.0249842	0.0229877	0.0244105	2.45799	0.683377	0.00912981	0.000205108	2.13656	0.0172158	0.0305564	0.0451965	0.0204695	0.0416908	0.484081	6.0926	0.00649298	0.0032832	0.000385059	0.18761	0.020904	0.00198116	0.271271	0	0	0.0127048	0.369177	0	0.160589	0	0.026109	0.00861066	0.766577	0.784917	0.187124
2019-07-07 05:00:29	8.56055	2.36084	3.07536	1.23322	1.74199	0.494256	0.0344486	0.111386	0.108471	0.0935346	0.677132	0.0343375	0.0377643	0.0619455	0.219032	0.0284631	0.0247902	0.0278323	2.99672	0.869358	0.0129743	0.000308553	1.88616	0.0118123	0.0211899	0.0369837	0.0184265	0.0322367	0.745813	6.13947	0.00540811	0.00315061	0.00099369	0.153262	0.0267188	0.00398635	0.675223	0	0	0.0134813	0.366743	0	0.302212	0	0.0267172	0.00838679	1.03385	0.865983	0.192686
2019-07-07 06:00:29	9.42266	2.66113	3.19789	1.54442	2.4983	0.686634	0.032795	0.194707	0.193124	0.146363	0.252911	0.0539033	0.0572996	0.0724106	0.221935	0.0295925	0.0251266	0.0261494	3.23144	0.96898	0.0275108	0.1788	2.32357	0.0109921	0.0366479	0.0713347	0.0151873	0.0625851	0.211662	5.56293	0.00556144	0.00572584		0.189362	0.0212023	0.00241594	0.223023	0	0	0.0217948	0.361792	0	0.123985	0	0.0220713	0.00782911	1.06999	0.956849	0.198082
2019-07-07 07:00:29	10.5291	2.95483	3.34075	1.527	1.38782	0.499154	0.0332154	0.184812	0.177672	0.115721	0.394191	0.0402077	0.064267	0.0773946	0.22412	0.0301685	0.0251702	0.0249629	3.87977	0.997674	0.102096	0.152565	2.19145	0.00821003	0.0257345	0.0307073	0.0561948	0.0280274	0.208766	6.87656	0.00441411	0.0023163	0.000918464	0.164684	0.0586946	0.00401789	0.432047	0	0	0.0175175	0.403284	0	0.188988	0	0.020156	0.00710986	1.16758	1.14135	0.202746
2019-07-07 08:00:29	10.2541	4.07728	3.22517	1.54397	1.18592	0.432997	0.0343232	0.196602	0.190769	0.0917626	0.241948	0.0604423	0.0682503	0.0797991	0.246985	0.0293595	0.0247762	0.0258721	3.6941	0.933272	0.000378504	0.159382	2.1494	0.0152101	0.0237677	0.034307	0.160488	0.0232699	0.203571	5.30297	0.00433802	0.00180809	0.00257658	0.171345	0.195218	0.0205219	0.339755	0	0	0.030995	0.506682	0	0.320729	0	0.0253503	0.00809037	0.843683		0.319562
2019-07-07 09:00:29	5.31823	2.02435	2.73916	1.1262	1.90891	0.367238	0.0304208	0.117394	0.114568	0.0834363	0.19537	0.0458148	0.0480032	0.0537344	0.214137	0.0202331	0.018343	0.0150356	2.05174	0.123364	0.000388057	0.00167957	1.93892	0.00586359	0.0124518	0.0246197	0.213984	0.087803	0.199424	2.78604	0.00599399	0.00335959	0.00134762	0.161018	0.0546907	0.0037592	0.538559	0	0	0.0108701	0.360515	0	0.127354	0	0.0197208	0.00685524	0.699205	0.856252	0.198764
2019-07-07 10:00:29	2.31914	0.857092	2.51396	0.795927	1.63671	0.349416	0.0252019	0.0921763	0.0967638	0.0701619	0.347917	0.0297746	0.0274127	0.0414154	0.206948	0.0124614	0.01409	0.0112687	0.933706	0.01431	0.000139221	0.000387012	1.79656	0.000848236	0.145263	0.000926703	0.135992	0.0771725	0.487122	1.20577	0.00635966	0.00235314	0.000629564	0.181445	0.014527	0.00205864	0.286084	0	0	0.00758282	0.349336	0	0.154383	0	0.0185641	0.00705963	0.408977	0.58881	0.176667
2019-07-07 11:00:29	1.51507	0.487865	2.16158	0.578686	1.31128	0.360298	0.0211418	0.0457934	0.0465506	0.0306224	0.151927	0.0112747	0.0113583	0.0260639	0.207223	0.0106755	0.0130975	0.0110279	0.470515	0.00235262	0.000424174	0.000172225	1.55402	0.00350939	0.138356	0.0114784	0.0965263	0.0679485	0.317092	0.6219	0.00572832	0.00185361	0.000637392	0.118667	0.0278601	0.00298984	0.147106	0	0	0.00658698	0.256517	0	0.114607	0	0.01824	0.00732302	0.266792	0.455965	0.176672
2019-07-07 12:00:29	1.43893	0.324568	1.98936	0.562709	1.02253	0.299964	0.0185488	0.0851784	0.0827053	0.0560329	0.306105	0.019444	0.0184671	0.0373743	0.206495	0.0109954	0.0137288	0.0143843	0.456819	0.000402955	0.000219965	0.000308339	1.49664	0.000737875	0.119909	0.0139612	0.109587	0.066043	0.443029	0.648285	0.00505873	0.000281051	0.000626167	0.172584	0.0222179	0.00236676	0.411419	0	0	0.00908802	0.375664	0	0.164719	0	0.0182637	0.0075922	0.336541	0.43904	0.191517
2019-07-07 13:00:29	1.33766	0.378016	2.02355	0.494956	1.24452	0.233656	0.0168049	0.0316179	0.0299573	0.0265636	0.12255	0.0145189	0.0127468	0.0343349	0.204739	0.00945883	0.0131367	0.00902287	0.590554	0.000677598	0.000267437	0.000301686	1.45381	0.00466966	0.0918264	0.0126008	0.116306	0.0490383	0.293177	1.86537	0.00549177	0.000460907	0.000414769	0.0733916	0.0085599	0.000777245	0	0	0	0.0077643	0.372267	0	0.0691004	0	0.017121	0.00777515	0.338658	0.36153	0.188036
2019-07-07 14:00:29	1.19511	0.152001	2.15768	0.508751	1.4628	0.335417	0.0256892	0.0442142	0.0426086	0.027962	0.285296	0.0138763	0.0114103	0.035495	0.204299	0.0106486	0.014025	0.0108271	0.318783	0.000585049	0.000794141	0.000288939	1.47089	0.00126405	0.115554	0.0151555	0.144081	0.0696457	0.432312	0.493414	0.00574201	0.00270402	0.000754298	0.0805046	0.00673239	0.00128686	0.132896	0	0	0.00783854	0.382239	0	0.108671	0	0.0188811	0.00834956	0.32604	0.349502	0.200516
2019-07-07 15:00:29	1.31351	0.668727	2.48265	0.627223	0.865853	0.216651	0.0221652	0.0408438	0.036566	0.0282689	0.299296	0.0182912	0.0155506	0.0376862	0.207309	0.0147157	0.0152755	0.010983	0.392786	0.00588613	0.000165725	0.000223605	1.59491	0.000259945	0.075844	0.0152828	0.185106	0.0474041	0.434967	0.464166	0.00377879	0.000224491	0.000512064	0.0932826	0.00395375	0.00145291	0.522693	0	0	0.00826851	0.409274	0	0.186405	0	0.0193484	0.00793916	0.364009	0.417773	0.214422
2019-07-07 16:00:29	1.05067	0.272965	2.72277	0.510397	1.48067	0.313367	0.0244548	0.027417	0.0256789	0.0243008	0.0905299	0.0119811	0.01124	0.0347729	0.204688	0.0110256	0.0154022	0.0116761	0.214547	0.00125055	9.72035e-05	0.00030088	1.68567	0.000332589	0.104713	0.0125918	0.110619	0.0599701	0.266302	0.288297	0.00631616	0.0007773	0.000723385	0.0947681	0.00605839	0.00117026	0	0	0	0.00872601	0.430862	0	0.0808959	0	0.020323	0.00888465	0.345554	0.356692	0.231999
2019-07-07 17:00:29	0.9254	0.0628887	3.03571	0.0054596	1.59702	0.280951	0.0385713	0.0253341	0.0029098	0.0155285	0.145786	0.0125187	0.00932978	0.0333617	0.204564	0.00969604	0.0148398	0.0144884	0.186069	0.000179825	0.000103826	0.00116118	1.60185	0.000415719	0.104779	0.0126107	0.241198	0.0587386	0.310676	0.126908	0.00574397	0.000576958	0.000555114	0.0917198	0.00548712	0.00105558	0	0	0	0.00860092	0.449768	0	0.0983661	0	0.0196305	0.00855887	0.365638	0.353939	0.24025
2019-07-07 18:00:29	0.993255	0.617232	3.47162	0.575798	1.05735	0.425411	0.0292131	0.030542	0.030544	0.00742471	0.075567	0.0116652	0.00772505	0.0318654	0.204296	0.00948635	0.0133663	0.0133092	0.234119	0.000427886	0.000214228	0.00103856	1.66828	0.00236042	0.1453	0.0164683	0.158894	0.0831143	0.247703	0.112048	0.00403598	0.000414121	0.000674773	0.111637	0.00454789	0.0126983	0	0	0	0.00739861	0.418729	0	0.0527613	0	0.0157041	0.0076767	0.348353	0.317807	0.215384
2019-07-07 19:00:29	0.995222	0.953593	3.03376	0.564944	1.3363	0.197943	0.0155514	0.0237795	0.0224777	0.0168232	0.0367127	0.0116928	0.0164084	0.0308738	0.204725	0.00865598	0.0118661	0.00756075	0.367984	0.0532771	0.000271916	0.000410581	1.53692	0.00403271	0.0676566	0.011101	0.103849	0.041998	0.192229	0.486074	0.00518567	0.00386469	0.000417013	0.066121	0.00299028	0.000849509	0	0	0	0.00685023	0.37665	0	0.0560494	0	0.0146777	0.0068104	0.329185	0.299615	0.19414
2019-07-07 20:00:29	1.50738	1.49676	3.16303	0.722543	1.37458	0.310526	0.0269962	0.0393911	0.0355528	0.0364222	0.0760176	0.0203345	0.0202382	0.0349302	0.207042	0.0155454	0.0140204	0.00847188	0.628859	0.000959339	0.00046154	0.0854648	1.64763	0.00716439	0.125225	0.0188156	0.107852	0.0676815	0.194523	0.970175	0.00541092	0.00286046	0.000723532	0.091186	0.00738671	0.00183448	0	0	0	0.00668879	0.368184	0	0.0529146	0	0.0137193	0.0060263	0.383399	0.366197	0.186354
2019-07-07 21:00:29	2.65537	1.42462	3.04938	1.17199	1.7928	0.386267	0.0667165	0.15604	0.14953	0.111321	0.427054	0.0600032	0.0633096	0.0497636	0.214376	0.0223113	0.019439	0.0154627	1.96017	0.487873	0.000502366	0.118996	1.95919	0.0313636	0.0219844	0.0318294	0.111899	0.0357503	0.550623	1.70261	0.00635828	0.00323204	0.000752434	0.0972495	0.00331781	0.00311009	1.25364	0	0.0663525	0.00771913	0.511251	0	0.161836	0	0.013166	0.00503043	0.621186	0.853339	0.20242
2019-07-07 22:00:29	4.14731	2.45636	3.75879	2.06047	2.05624	0.680413	0.0932164	0.23587	0.224023	0.198301	0.947171	0.096179	0.0966081	0.0748339	0.218341	0.0340154	0.0282745	0.0201199	3.07584	1.00967	0.0339815	0.209122	0.914532	0.0361897	0.0461886	0.0589544	0.00552698	0.075228	0.229171	2.58509	0.000942077	0.00222317	0.000475709	0.135585	0.00493027	0.00422412	1.86497	0	0.2093	0.00759774	0.577342	0	0.246913	0	0.0132418	0.00504149	0.809402	1.36893	0.250773
2019-07-07 23:00:29
2019-07-08 00:00:29	2.38069	1.18283	3.70247	0.993407	1.90473	0.4488	0.0260936	0.0757445	0.074003	0.0541352	0.246848	0.0310553	0.0287311	0.042281	0.20942	0.0162844	0.017411	0.0115732	1.07888	0.000742667	7.43861e-05	0.000572745	2.11685	0.00816323	0.00764754	0.0123174	0.0161815	0.0746353	0.391057	0.850307	0.00666607	0.000906794	0.000798818	0.09506	0.00453952	0.00233486	0.462786	0	0	0.00935227	0.365408	0	0.131497	0	0.0188899	0.00919968	0.572862	0.612352	0.219629
2019-07-08 01:00:29	1.95381	0.415756	2.75744	0.542445	1.59587	0.280042	0.01761	0.0452299	0.0468898	0.030903	0.108366	0.0121675	0.0103512	0.0361676	0.206551	0.0104864	0.0116695	0.0094867	0.832764	0.000393768	0.000528661	0.000175187	1.60407	0.0062542	0.103848	0.00951242	0.0044365	0.0595271	0.276579	0.458065	0.00651371	0.00982049	0.000632188	0.151888	0.0119239	0.0309804	0	0	0.00719832	0.00656874	0.306927	0	0.0599564	0	0.0152805	0.00600724	0.675896	0.375683	0.152917
2019-07-08 02:00:29	1.91186	0.396713	2.12588	0.461642	0.675676	0.182544	0.0209071	0.00763538	0.0135984	0.0160293	0.0369117	0.00854218	0.0079557	0.0333371	0.206106	0.0116428	0.0107185	0.0120639	1.23919	0.00033597	0.000277891	0.000983788	1.33403	0.00284154	0.0547365	0.00827064	0.00224363	0.0339089	0.217885	0.598906	0.00520035	0.00459782	0.000730517	0.0978575	0.00761632	0.0416425	0	0	0.000407	0.00548607	0.19414	0	0.0466693	0	0.0165125	0.00599757	0.770276	0.384204	0.428625
2019-07-08 03:00:29	1.8943	0.362129	1.69777	0.396123	0.350507	0.100609	0.00887831	0.00614024	0.00491163	0.00784528	0.0125645	0.00792552	0.00831355	0.0316905	0.209558	0.0211135	0.00990209	0.00792447	1.24527	0.000247748	0.000259833	0.000306905	1.10455	0.00392858	0.029656	0.00440071	0.000907642	0.0169893	0.199154	0.719399	0.00362011	0.00271841	0.000350673	0.0681095	0.00405843	0.0436304	0	0	0.00273635	0.00564899	0.192754	0	0.0351111	0	0.0172539	0.00595694	0.79707	0.347548	0.375122
2019-07-08 04:00:29	1.7881	0.341114	1.34878	0.344995	0.300105	0.0737577	0.00844641	0.00503012	0.00745382	0.00686628	0.022438	0.00675336	0.00629898	0.0300387	0.206887	0.0103957	0.0098715	0.00855249	1.01048	0.00390712	0.000189425	0.000209177	0.968146	0.0041247	0.0205555	0.0040002	0.000583081	0.0120387	0.191065	0.900302	0.00542571	0.000405813	0.000295104	0.0612469	0.00464662	0.0136438	0	0	0	0.00595009	0.186762	0	0.0441778	0	0.0177214	0.00570404	0.702541	0.325504	0.381279
2019-07-08 05:00:29	1.68501	0.335871	1.35879	0.336921	0.295777	0.0763397	0.00901509	0.0208695	0.00274543	0.00620567	0.0373413	0.00603057	0.00594746	0.0309954	0.204313	0.0132456	0.00603379	0.00606014	0.822815	0.000825567	0.000453236	0.000434195	0.441896	0.00345016	0.098894	0.00507609	0.000697241	0.0121569	0.220829	0.00157624	0.00454963	0.00293945	0.000302732	0.0609417	0.00971742	0.0462519	0	0	0	0.00575443	0.181118	0	0.0516312	0	0.0098293	0.00353121	0.610781	0.312456	0.229271
2019-07-08 06:00:29	1.70159	0.340363	1.29615	0.350051	0.28082	0.0833868	0.00878915	0.0302756	0.0034368	0.00586347	0.0212565	0.00635722	0.00608152	0.0303406	0.203466	0.0147516	0.00664244	0.00879954	0.783458	0.000370195	0.000189425	0.000293276	0.984313	0.00434086	0.0949008	0.00466748	0.00121025	0.0135904	0.207929	1.16349	0.00368234	0.00279609	0.000265194	0.0555203	0.00581325	0.0434338	0	0	0	0.00548187	0.175806	0	0.0425914	0	0.0110075	0.00380914	0.563149	0.305462	0.26055
2019-07-08 07:00:29	2.24611	1.21653	1.28888	0.454882	0.545614	0.143866	0.0130262	0.0357079	0.0151355	0.0129481	0.0206713	0.00884054	0.0090604	0.03389	0.20747	0.0209601	0.00928047	0.01132	1.07759	0.00161268	0.000146238	0.000198263	0.989822	0.00492072	0.0457667	0.00991134	0.00777495	0.0266056	0.190848	1.51543	0.00561278	0.000460271	0.000179565	0.0971797	0.0072944	0.0262239	0	0	0	0.00586186	0.179824	0	0.0369332	0	0.0139679	0.00493696	0.645377	0.330985	0.350441
2019-07-08 08:00:29	2.14201	1.02924	1.32946	0.436527	0.206654	0.0680854	0.0058567	0.0399241	0.0380312	0.0145683	0.0389848	0.0103783	0.0126964	0.0363151	0.205997	0.0237899	0.00934797	0.00875503	1.22662	0.000804685	9.89509e-05	0.00036692	1.01587	0.00475007	0.0618162	0.0111	0.00645747	0.0100904	0.193036	2.79008	0.00138332	0.000553656	0.00664469	0.0996882	0.017827	0.0553175	0	0	0.0490726	0.00635339	0.195909	0	0.0361108	0	0.0153591	0.00563108	0.743658	0.359203	0.390298
2019-07-08 09:00:29	2.21412	0.696686	1.23355	0.424667	0.259447	0.0633532	0.00626903	0.0274888	0.00879146	0.0114184	0.0230621	0.0122134	0.0115286	0.00327845	0.211684	0.0108638	0.00985338	0.00909063	1.29887	0.00612066	0.000219517	0.000147602	0.978842	0.00354336	0.0797207	0.00424406	0.0175741	0.0108411	0.191355	4.26821	0.0027101	0.00409055	0.000336083	0.0975076	0.0402694	0.0596966	0	0	0.0751402	0.0138178	0.345067	0	0.0665353	0	0.0145132	0.00556348	0.867425	0.692628	0.177523
2019-07-08 10:00:29	2.84107	1.27803	1.18931	0.607053	0.308224	0.0859311	0.0133174	0.0182463	0.0175661	0.0158705	0.0473982	0.0175565	0.0182484	0.0427429	0.206234	0.026022	0.0104648	0.00877028	1.67208	0.00275964	0.000145143	0.000333763	0.888899	0.000977395	0.0283797	0.00559243	0.0411882	0.0165066	0.192558	5.41728	0.00494149	0.00497662	0.000429939	0.133576	0.0278927	0.0671793	0	0	0.0891511	0.0092654	0.194163	0	0.277333	0	0.014617	0.00586281	0.819066	0.405766	0.455975
2019-07-08 11:00:29	2.84209	1.61004	1.56362	0.65353	0.590404	0.0973007	0.0144249	0.0327695	0.0270536	0.0176636	0.026237	0.0163661	0.015587	0.0437084	0.234561	0.0114313	0.0102221	0.0118153	1.52476	0.0298866	0.00010584	0.000736301	1.17757	0.000845207	0.0271136	0.00662386	0.0471189	0.0159526	0.191232	4.8146	0.00930943	0.000728727	0.000357106	0.154485	0.0145401	0.0703463	0	0	0.0593424	0.0174548	0.356606	0	0.947077	0	0.0142792	0.00555425	0.78234	0.813699	0.147273
2019-07-08 12:00:29	3.06752	1.44683	1.67968	0.780996	0.66926	0.209284	0.0252619	0.0381111	0.0402398	0.0475742	0.0631749	0.0181292	0.0182134	0.0503667	0.212235	0.0147796	0.0104919	0.00946219	1.24903	0.00636126	0.000156038	0.000215727	1.26863	0.000758047	0.0722893	0.00946066	0.0876786	0.0422951	0.235833	2.58612	0.007495	0.0109147	0.000517106	0.171898	0.0324793	0.0823791	0.0477247	0	0.0341654	0.0093125	0.19442	0	0.635024	0	0.0157152	0.00586977	0.726021	0.415991	0.422177
2019-07-08 13:00:29	10.192	8.74604	2.40434	2.46742	0.611409	0.181665	0.0141421	0.0375866	0.0389444	0.0201038	0.104178	0.0220348	0.0213734	0.0781078	0.224094	0.0138922	0.0104766	0.0122122	2.12297	0.0845694	0.00034314	0.000419884	1.48087	0.00313779	0.212964	0.0104105	0.0714731	0.029022	0.275308	1.15682	0.0055007	0.000315133	0.000286162	0.0650436	0.0150373	0.0926046	0	0	0	0.0150148	0.406733	0	0.659548	0	0.0146216	0.0050905	0.590673	0.795287	0.136472
2019-07-08 14:00:29	10.4975	9.66989	2.51093	2.96693	0.511079	0.267317	0.0178885	0.0499399	0.0519337	0.0517303	0.149239	0.0271699	0.0294153	0.0864336	0.217466	0.0351423	0.0103057	0.00737567	0.773471	0.000887146	0.00102757	0.000249515	0.0591298	0.0062682	0.0841445	0.0126167	0.0947142	0.0464751	0.197173	1.05544	0.00524195	0.00292095	0.000422935	0.0491226	0.0194577	0.0720905	0	0	0	0.0051807	0.153624	0	0.114531	0	0.0127844	0.00455288	0.409881	0.351184	0.399231
2019-07-08 15:00:29	12.6222	12.5725	2.91567	3.87237	0.443831	0.237903	0.0125407	0.0585977	0.0569455	0.0318185	0.107198	0.0295321	0.0306939	0.0927791	0.219089	0.0321084	0.00999704	0.010683	0.424939	0.000278445	9.79504e-05	0.000326365	1.42797	0.00530364	0.0691238	0.00563494	0.0561081	0.0385762	0.277465	0.761636	0.00393833	0.0020318	0.000284391	0.0392344	0.00960273	0.0568182	0	0	0	0.00462641	0.151265	0	0.0840463	0	0.0136473	0.0047624	0.388926	0.285108	0.40673
2019-07-08 16:00:29	7.47549	7.26589	2.18689	2.49898	0.691871	0.343883	0.0202564	0.0276754	0.0999234	0.0625637	0.127104	0.0263872	0.0287982	0.0753646	0.209073	0.0106331	0.00417755	0.00367035	0.557116	0.00116828	0.00043816	0.000353904	1.16532	0.0251819	0.11844	0.0106255	0.0714144	0.0670912	0.283257	0.735805	0.00487943	0.00108762	0.000250204	0.0718541	0.00670624	0.0449427	0	0	0	0.00597395	0.14708	0	0.965046	0	0.00499105	0.00156005	0.35353	0.327107	0.149234
2019-07-08 17:00:29	6.53531	6.38057	2.11752	2.09585	0.398486	0.175482	0.0148897	0.0399097	0.0452765	0.0368751	0.109712	0.0173475	0.0192657	0.0663876	0.218916	0.0293773	0.00927789	0.00941436	1.54721	0.00076708	0.000120402	0.000119386	1.01565	0.00317516	0.0483552	0.00527688	0.0279795	0.0311773	0.196654	1.00724	0.00334854	0.00244387	0.00134633	0.0890576	0.00658443	0.0443144	0.767625	0	0.505571	0.00637443	0.155124	0	1.26059	0	0.0128317	0.00378957	0.351435	0.389212	0.883732
2019-07-08 18:00:29	7.07347	6.30944	1.80197	2.12506	0.340022	0.123754	0.013304	0.0140354	0.0328112	0.0179983	0.0954226	0.0263272	0.0279695	0.0756745	0.234946	0.0167829	0.0107973	0.00733373	2.29364	0.00061064	0.000219007	0.000302319	1.15583	0.0322542	0.00914509	0.00611975	0.0491479	0.0221857	0.198135	1.62918	0.00444139	0.00080949	0.000480812	0.0616606	0.00622932	0.0450744	0	0	0	0.0112904	0.313654	0	0.956999	0	0.0125176	0.00381944	0.41128	0.849973	0.153523
2019-07-08 19:00:29	9.6582	9.20806	2.33214	3.22681	0.392353	0.164366	0.00677437	0.0485127	0.038041	0.0329239	0.197366	0.0457783	0.0432191	0.111718	0.272961	0.0421988	0.0176197	0.00940263	1.49316	0.000684916	0.000529353	0.000310576	1.37265	0.0318638	0.122865	0.0222325	0.0359034	0.0197186	0.207727	1.12411	0.000317368	0.00087984	0.000511319	0.0748599	0.00140748	0.0611273	0	0	0	0.0146494	0.32501	0	2.36088	0	0.0137332	0.00395753	0.436044	0.942033	0.151281
2019-07-08 20:00:29	9.39578	9.19867	2.4426	3.32025	0.380951	0.233042	0.0123624	0.0176064	0.0182068	0.0955524	0.218671	0.0421566	0.0437849	0.111678	0.225826	0.0670923	0.0148877	0.0119361	1.28169	0.0243513	0.000227891	0.0147211	0.0152144	0.0343461	0.0111279	0.00317507	0.0395612	0.0454818	0.21667	1.09515	0.00438128	0.000783872	0.000183821	0.0912992	0.00134737	0.0536881	0	0	0	0.00476878	0.136876	0	0.366168	0	0.011477	0.00360794	0.414367	0.416597	0.384199
2019-07-08 21:00:29	8.01741	8.21409	2.48529	2.68662	0.695246	0.353433	0.0217104	0.0941116	0.0892279	0.0512618	0.112652	0.027616	0.0265955	0.061796	0.220118	0.029409	0.00780978	0.00759257	1.13722	0.00370316	0.000235433	0.00522302	1.47128	0.00219142	0.11694	0.0113601	0.0325036	0.0651456	0.194824	1.99845	0.00623448	0.00118269	0.000484689	0.0969106	0.00832487	0.0318922	0	0	0	0.00351437	0.0726554	0	0.579976	0	0.010284	0.00250034	0.321992	0.399132	0.266434
2019-07-08 22:00:29	7.82152	7.76225	2.66332	2.73489	1.00498	0.412197	0.0277364	0.0500843	0.0981411	0.0508292	0.176906	0.0337117	0.0373169	0.0924292	0.229821	0.0201402	0.00709496	0.00439646	1.31943	0.0598164	0.00019721	0.0391304	1.69207	0.00523634	0.347433	0.00707235	0.01521	0.0651182	0.20251	1.20745	0.00524311	0.00370268	0.000608361	0.0931184	0.011763	0.0516	0	0	0	0.00840331	0.136416	0	0.550335	0	0.00504864	0.00114662	0.390947	0.443674	0.146243
2019-07-08 23:00:29
2019-07-09 00:00:29	4.52478	3.51456	2.83763	1.61859	0.568438	0.196173	0.0139539	0.028514	0.0416753	0.0292819	0.0843901	0.0201668	0.0239099	0.0675412	0.214462	0.0170868	0.0129448	0.0103072	0.60942	0.00819544	7.31852e-05	0.000198121	2.12956	0.0142844	0.141361	0.00574249	0.00330515	0.0265232	0.19231	0.626722	0.00425703	0.00326322	0.000482231	0.0476479	0.009701	0.0537834	0	0	0	0.00750803	0.134386	0	0.169397	0	0.0239454	0.00839334	0.494675	0.441138	0.433314
2019-07-09 01:00:29	4.1242	2.97825	2.07296	1.17005	1.01082	0.22026	0.0167166	0.0426003	0.0322738	0.034869	0.067183	0.0130135	0.0127054	0.0614911	0.218125	0.0108548	0.00908741	0.00348569	0.590822	0.0133077	0.000276818	0.0178577	1.30847	0.00293279	0.354185	0.00623564	0.00219775	0.0460982	0.193394	0.687859	0.00570311	0.000562474	0.00038078	0.0686366	0.00921106	0.0512022	0.0426183	0	0	0.0050739	0.131678	0	0.180111	0	0.00603273	0.00183852	0.4214	0.346047	0.126413
2019-07-09 02:00:29	4.43398	2.86464	2.0968	1.17505	0.836186	0.36895	0.0224316	0.0859844	0.0410688	0.0235769	0.0533879	0.00847736	0.00693851	0.0578821	0.217462	0.0273631	0.00894826	0.00740871	0.932106	0.000838216	0.000438359	0.00129997	1.22859	0.00263942	0.108352	0.0141936	0.00303454	0.0653151	0.196349	1.93218	0.00665335	0.0015459	0.000529222	0.100007	0.00907881	0.0334365	0	0	0	0.00782849	0.126726	0	0.264804	0	0.0120428	0.00329224	0.304474	0.35395	0.292462
2019-07-09 03:00:29	4.95763	2.4683	2.0544	1.02173	0.359921	0.127929	0.0112949	0.0312652	0.0233625	0.0166273	0.0795276	0.027984	0.017989	0.0528845	0.220654	0.0593496	0.0136138	0.0148341	1.14181	0.0351487	0.000189916	0.000883861	1.24816	0.0111741	0.118872	0.00398036	0.00218369	0.0240338	0.197396	2.63573	0.00424136	0.00398336	0.000361743	0.0620016	0.0138238	0.0513185	0	0	0	0.00824132	0.120265	0	0.269808	0	0.013508	0.00398969	0.550196	0.376109	0.344948
2019-07-09 04:00:29	5.26164	2.443	1.99689	1.00441	0.574394	0.18493	0.0178863	0.030699	0.032543	0.0290572	0.0745744	0.0346075	0.0171761	0.0481281	0.219323	0.0223824	0.0128473	0.0142223	0.972812	0.00121916	7.65912e-05	0.000201208	1.30626	0.00103889	0.204168	0.0088402	0.00446384	0.0416585	0.2487	2.59703	0.00536176	0.00395708	0.000341357	0.0866976	0.0138027	0.043611	0.0241149	0	0	0.00800714	0.123442	0	0.201914	0	0.0103524	0.00341122	0.534954	0.387502	0.356503
2019-07-09 05:00:29	5.78723	2.59282	2.08737	0.975352	0.296429	0.0959813	0.0109851	0.0281937	0.0218239	0.0183812	0.069578	0.0304252	0.0196659	0.0479717	0.220435	0.0152	0.00993933	0.0142897	2.96406	0.000665808	0.000431485	0.000259262	1.27383	0.011337	0.0967382	0.00504915	0.00232376	0.0157798	0.192283	3.51097	0.00033737	0.00272856	0.000308099	0.055019	0.0116133	0.0503408	0.153082	0	0	0.015435	0.235871	0	0.687679	0	0.0141591	0.00184715	0.595677	0.793315	0.127468
2019-07-09 06:00:29	6.33589	3.07758	2.33352	1.1038	0.822945	0.180803	0.0246007	0.0339817	0.0684049	0.0324966	0.0741928	0.0365793	0.0172424	0.0490297	0.213605	0.0139639	0.009869	0.0137638	2.39526	0.000274643	0.000381164	0.000206005	1.38464	0.0057679	0.0620704	0.00620817	0.003163	0.0366857	0.247422	2.59465	0.00640392	0.00531955	0.000618111	0.107982	0.0113677	0.0451428	0.249345	0	0	0.00699964	0.123108	0	0.177991	0	0.0134989	0.00339023	0.521709	0.423506	0.349211
2019-07-09 07:00:29	7.94467	3.5033	2.37888	1.28982	0.412906	0.166012	0.0134726	0.0282221	0.031087	0.0239721	0.0564425	0.0401905	0.0263784	0.0563497	0.212202	0.034194	0.0100791	0.0130269	5.74577	0.0187249	0.000251875	0.00419398	1.49475	0.00291698	0.0374596	0.00734617	0.00566682	0.0287623	0.196682	5.33709	0.00356795	0.0022172	0.000377905	0.0497928	0.00579668	0.0250964	0.130733	0	0	0.00843723	0.125328	0	0.391194	0	0.0143208	0.0034193	0.557067	0.509933	0.39017
2019-07-09 08:00:29	6.40908	3.59914	2.35667	1.37953	1.05529	0.228078	0.0205995	0.0566975	0.0572633	0.0350467	0.0833715	0.0369825	0.0244072	0.0465541	0.217084	0.0154362	0.0108405	0.0133065	2.11436	0.0186304	0.000115359	0.00100749	1.57925	0.0282341	0.386338	0.0126539	0.0210646	0.046125	0.198569	3.22982	0.00639667	0.000383846	0.000520462	0.0836935	0.00766944	0.0317292	0.0582464	0	0	0.00893599	0.135241	0	0.591362	0	0.0115047	0.00311075	0.456396	0.796828	0.14442
2019-07-09 09:00:29	6.57249	3.97437	2.42266	1.49226	0.548867	0.151723	0.0129871	0.0286385	0.0308111	0.01899	0.101391	0.0413204	0.0269454	0.0587064	0.227105	0.0156569	0.0112508	0.0139636	1.83985	0.129497	0.00015836	0.167159	1.73267	0.0285025	0.184398	0.00211087	0.0214935	0.0288201	0.200926	3.53642	0.00430186	0.000412944	0.000306343	0.0475441	0.00981009	0.0378323	0	0	0	0.0120968	0.27279	0	0.450185	0	0.0124032	0.00317583	0.48	0.97545	0.140254
2019-07-09 10:00:29	6.24224	4.03801	2.19413	1.44244	0.386178	0.149924	0.00935556	0.0210434	0.034326	0.0208302	0.0934509	0.0331745	0.0180878	0.0614141	0.239893	0.0225613	0.0129492	0.0107211	0.987785	0.0165004	0.00031346	0.000155341	1.08281	0.0177448	0.117652	0.00501742	0.0355387	0.0254622	0.196704	3.80573	0.00590686	0.00157992	0.000953978	0.166143	0.0335837	0.0426287	0.285876	0	0.0764954	0.0130511	0.387464	0	0.422681	0	0.0114781	0.00302241	0.4236	0.902538	0.151883
2019-07-09 11:00:29	6.55524	4.35698	2.02562	1.70177	0.358923	0.149047	0.0144509	0.0331765	0.0311347	0.0234705	0.143982	0.0238832	0.0242501	0.099979	0.253187	0.0230028	0.01135	0.011029	1.90683	0.0419956	0.000233612	0.0167461	1.01091	0.0274034	0.0379011	0.00488966	0.039904	0.0238694	0.235875	2.88834	0.000268073	0.000557611	0.000470001	0.197578	0.000888665	0.048916	0	0	0	0.0118343	0.304671	0	0.360677	0	0.0117812	0.00310765	0.40995	0.865435	0.134735
2019-07-09 12:00:29	6.37353	4.39892	1.92644	1.52695	0.458196	0.180624	0.0174452	0.0278538	0.0375954	0.0198019	0.0581824	0.0206544	0.0225315	0.0684226	0.220977	0.0373839	0.0102385	0.0110306	1.31619	0.0191841	0.000128418	0.00957335	1.38017	0.0028301	0.0605835		0.0383861	0.0359855	0.19722	1.87583	0.00393526	0.000519119	0.00058571	0.0880965	0.00521001	0.0298778	0	0	0	0.0052532	0.126049	0	0.587546	0	0.0109013	0.00281458	0.385428	0.356001	0.378175
2019-07-09 13:00:29	5.60125	4.20037	1.70869	1.41768	0.744312	0.319607	0.0230924	0.0328621	0.0336183	0.0185262	0.107108	0.0180076	0.0182789	0.0779443	0.228137	0.029823	0.0129615	0.0116335	0.650619	0.000482685	0.000297277	0.000161622	1.16964	0.0167739	0.0158986	0.0067213	0.0345848	0.0679022	0.20685	0.843849	0.00454683	0.00297434	0.000438929	0.134528	0.00961121	0.0541165	0	0	0	0.00469903	0.12821	0	0.209806	0	0.00927351	0.00299469	0.349683	0.314697	0.367511
2019-07-09 14:00:29	5.59218	3.92084	1.71588	1.34492	0.392988	0.149683	0.0141415	0.0372102	0.0334738	0.0183582	0.0614877	0.013745	0.0141721	0.0474334	0.233237	0.0284375	0.018065	0.00968497	0.551587	0.00279626	0.000157022	0.000191257	0.97776	0.0146085	0.116744	0.00648784	0.0617319	0.0188906	0.195377	0.824604	0.00460243	0.00196613	0.000425109	0.0529957	0.000417345	0.0397215	0	0	0	0.0067069	0.153522	0	0.30295	0	0.0111958	0.0028017	0.29426	0.649455	0.128849
2019-07-09 15:00:29	5.93826	2.82357	1.5109	0.931072	0.454812	0.149595	0.0148912	0.0249946	0.0267944	0.0311275	0.0718439	0.0160412	0.0177854	0.0530203	0.210285	0.0288702	0.00920836	0.00861898	0.61289	0.00087421	0.00016496	0.00016102	0.891992	0.0100487	0.155725	0.00601183	0.0123836	0.0287744	0.249647	0.982052	0.00414997	0.00209533	0.000404466	0.0540735	0.0124932	0.0625818	0	0	0	0.00441435	0.116674	0	0.176419	0	0.0090111	0.00263687	0.41539	0.340761	0.337493
2019-07-09 16:00:29	5.28341	2.75718	1.69064	1.0933	0.469328	0.14275	0.0149077	0.0390627	0.0402973	0.0482893	0.0822067	0.0261836	0.0265741	0.0549022	0.215815	0.0322848	0.00945127	0.00621315	1.17165	0.0185782	0.00011322	0.000529629	1.14751	0.00582466	0.0521445	0.00631743	0.0158847	0.0305137	0.195649	2.06835	0.00387955	0.00243859	0.00134593	0.0990232	0.0113869	0.0597754	0	0	0	0.017198	0.123893	0	0.253196	0	0.0118888	0.00295748	0.467942	0.487777	0.615892
2019-07-09 17:00:29	6.25674	3.76286	1.9539	1.42182	0.744224	0.136222	0.0128558	0.0375712	0.040116	0.0270385	0.0472546	0.0301894	0.0329025	0.0586306	0.233489	0.0156104	0.0108648	0.00613267	1.37896	0.0102508	0.000189598	0.000185674	1.24174	0.00518878	0.273802	0.00862094	0.0433725	0.0281601	0.229324	2.82188	0.00437043	0.00327699	0.000429142	0.0762848	0.006146	0.0549289	0	0	0	0.0173834	0.367115	0	0.615173	0	0.0113916	0.0026719	0.469313	1.31221	0.146826
2019-07-09 18:00:29	5.81233	2.65444	1.76497	0.947569	0.779005	0.230886	0.021256	0.0644047	0.0810564	0.0540616	0.077278	0.0249725	0.0255995	0.0573202	0.214278	0.0465945	0.013981	0.0107639	2.40573	0.000302489	6.50672e-05	0.00028736	1.1645	0.000548173	0.082235	0.00933849	0.0654807	0.0463304	0.253606	2.36629	0.00507652	0.00482558	0.000615615	0.209717	0.0117618	0.0630553	0	0	0.177553	0.00586506	0.135684	0	0.172633	0	0.0108299	0.00270998	0.437076	0.5487	0.797507
2019-07-09 19:00:29	6.04999	4.25033	2.40548	1.79237	0.95777	0.2938	0.0196223	0.0797471	0.0816068	0.0634801	0.124467	0.04359	0.0488123	0.0720326	0.21668	0.0239872	0.0148342	0.00780935	1.40727	0.00419603	0.000263984	0.000286371	1.5526	0.00237678	0.10828	0.012543	0.0844206	0.0603896	0.194871	2.13363	0.00536256	0.00190487	0.000567683	0.151371	0.0122046	0.0692919	0.0488586	0	0.19943	0.00656992	0.134113	0	0.257146	0	0.0104216	0.00268104	0.525754	0.702572	0.311288
2019-07-09 20:00:29	6.10225	5.67656	2.98163	2.61071	1.21092	0.558727	0.0327847	0.0621929	0.119909	0.0841857	0.100892	0.0339695	0.0397779	0.0541743	0.249539	0.0232039	0.0142518	0.00766721	1.96668	0.00393767	0.000712163	0.000191414	1.76575	0.00901113	0.187404	0.0182946	0.0894059	0.127789	0.196435	2.56363	0.0067067	0.000394137	0.000952091	0.349874	0.0105153	0.0396291	0.0227054	0	0.104993	0.0111523	0.175554	0	0.581854	0	0.0121593	0.00283614	0.468679	1.96293	0.199249
2019-07-09 21:00:29	5.38638	2.94882	2.80685	1.61348	1.15161	0.39587	0.0279805	0.0650315	0.107919	0.0878103	0.118153	0.0384209	0.0413624	0.0588631	0.220125	0.0161892	0.0125259	0.00792235	1.48219	0.0149216	0.000158626	0.000360275	1.52419	0.000632803	0.159245	0.0206354	0.0548536	0.0885756	0.195553	1.79617	0.00481182	0.000535322	0.000782358	0.222609	0.0149593	0.0536763	0	0	0.310513	0.0109375	0.140123	0	0.223171	0	0.0162642	0.0026119	0.495931	0.800443	0.215913
2019-07-09 22:00:29	8.54905	3.9808	2.92647	2.22166	1.71655	0.585664	0.0416895	0.0886176	0.295073	0.21913	0.241337	0.104339	0.124876	0.10604	0.235113	0.0420555	0.0320666	0.0242984	6.28537	1.90179	0.159152	0.379513	2.5444	0.0706363	0.0496138	0.0651852	0.154023	0.046351	0.235875	4.44728	0.00427922	0.00462304	0.000604168	0.528412	0.0247632	0.0663561	0.0698355	0	0.203824	0.00789987	0.146507	0	0.151034	0	0.0161983	0.00263061	1.34437	1.91258	0.339938
2019-07-09 23:00:29
2019-07-10 00:00:29	7.42184	4.78343	3.85688	3.09549	3.1042	1.86231	0.0605781	0.39716	0.373756	0.198323	0.174422	0.0964596	0.106101	0.0997034	0.260974	0.0867003	0.0667972	0.029425	2.29986	0.313789	0.000702758	0.232716	4.65965	0.00770448	0.532383	0.00130941	0.0965905	0.274612	0.206334	3.4774	0.00567211	0.000439845	0.00644736	0.888521	0.0382345	0.0602595	0.142996	0	0.330496	0.0308864	0.344578	0	0.346794	0	0.0215755	0.00804553	0.844044		0.42908
2019-07-10 01:00:29	7.99424	3.86239	2.92077	1.99137	1.4786	0.869033	0.0136205	0.0184283	0.138763	0.0983935	0.109068	0.0603884	0.0593038	0.069799	0.222361	0.0319364	0.0255827	0.0242287	1.58555	0.018588	9.61863e-05	0.139467	2.67503	0.00956953	0.453221	0.00654678	0.0523177	0.179321	0.197715	1.93986	0.00496842	0.00377899	0.00211275	0.257159	0.0138976	0.0521683	0.165222	0	0.0927978	0.00769568	0.144226	0	0.256505	0	0.0162268	0.00415765	0.650745	0.979069	0.627448
2019-07-10 02:00:29	8.04482	3.2226	2.68649	1.67985	1.33431	0.346169	0.0268407	0.0444753	0.153251	0.139972	0.142478	0.0460652	0.0506713	0.0644213	0.217167	0.0254825	0.0207567	0.021231	1.5945	0.391221	0.0890758	0.125272	2.17691	0.0213299	0.428119	0.0340717	0.0336387	0.0945358	0.20188	3.40662	0.00520431	0.000811185	0.000182162	0.251964	0.0202717	0.0436679	0	0	0.0775642	0.00708419	0.145181	0	0.171898	0	0.017887	0.00372213	0.58649	0.885985	0.56211
2019-07-10 03:00:29	9.7069	4.69135	2.90442	2.13452	1.54103	0.799816	0.0332282	0.177549	0.169294	0.163598	0.205161	0.0574641	0.0626605	0.0757199	0.250999	0.0256462	0.0221723	0.0213602	1.40364	0.478381	0.0236149	0.0693705	2.70467	0.0249939	0.247547	0.0231842	0.0383704	0.143432	0.202987	2.07165	0.00540215	0.00270312	0.00129041	0.605072	0.0261321	0.0486017	0.229395	0	0.169948	0.0182936	0.357761	0	0.673407	0	0.0185424	0.00301739	0.58392	2.06424	0.198423
2019-07-10 04:00:29	10.463	5.03465	3.05165	2.69401	1.93229	1.32684	0.0228155	0.061767	0.239274	0.158021	0.206707	0.0767685	0.0857791	0.0878111	0.2266	0.0312268	0.0254815	0.0214353	3.63161	0.781712	0.131518	0.224215	3.29354	0.0256231	0.585643	0.02324	0.0527916	0.253313	0.206065	4.8241	0.00565277	0.00139532	0.000365283	0.729106	0.0337946	0.051818	0.127008	0	0.301821	0.00869173	0.200141	0	0.122114	0	0.0202087	0.0032367	1.16986	1.28246	0.703664
2019-07-10 05:00:29	9.27073	4.28121	2.7636	2.04572	3.19642	1.93732	0.039748	0.0510025	0.173967	0.00462144	0.228704	0.0687146	0.069184	0.0721687	0.228175	0.0222577	0.0206807	0.0204568	2.4292	0.602937	0.0875274	0.160145	2.66554	0.0153104	0.613863	0.034619	0.00256374	0.359463	0.207553	3.53292	0.00604769	0.00816061	0.000414007	0.51026	0.0361971	0.00278799	0.420855	0	0.643761	0.0119038	0.317703	0	0.237802	0	0.0166869	0.00273066	1.12104	1.3394	0.173403
2019-07-10 06:00:29	9.46981	3.7369	2.57184	1.76936	3.29162	1.82327	0.0440948	0.192482	0.174979	0.0488251	0.149772	0.0445129	0.0508415	0.0758912	0.226585	0.0226046	0.0194405	0.018496	7.95759	0.6304	0.0387239	0.148866	2.35887	0.0177604	1.01963	0.0457165	0.0502287	0.33524	0.201831	7.56758	0.00635427	0.00565689	0.00149362	0.343636	0.0183767	0.00156381	0.621225	0	0.467229	0.0097155	0.276617	0	0.274914	0	0.0176592	0.00248536	1.01028	1.92356	0.20398
2019-07-10 07:00:29	9.02139	3.64506	2.47362	1.64033	1.25321	0.594286	0.0225476	0.0496363	0.242333	0.177014	0.184545	0.0678069	0.0745529	0.070301	0.223204	0.023098	0.017761	0.0179244	5.51338	0.565863	0.0396146	0.0319494	1.74425	0.00159874	0.38377	0.0416784	0.0784667	0.115853	0.20703	5.13291	0.00427159	0.00457916	0.000177613	0.264074	0.0186474	0.0389496	0.327352	0	0.33237	0.0106176	0.136673	0	0.211981	0	0.0206032	0.00250246	0.828536	1.53268	0.249348
2019-07-10 08:00:29	6.72161	2.62633	2.13828	1.20387	2.09029	0.682604	0.0445954	0.194689	0.192839	0.0918736	0.120093	0.0476187	0.0497184	0.0562381	0.212819	0.0189938	0.0141524	0.0148369	2.06294	0.0791592	0.000163304	0.00035226	1.77949	0.0199176	0.279383		0.0814334	0.163661	0.195673	2.62039	0.0060036	0.00417508	0.00296787	0.234141	0.0109388	0.053255	0.78178	0	0.686985	0.00816561	0.221677	0	0.165438	0	0.0143259	0.00232178	0.8636	1.45648	0.160131
2019-07-10 09:00:29	5.98207	2.44958	2.01509	0.940434	1.4654	0.487828	0.0239604	0.0313746	0.0119029	0.0446131	0.0549669	0.0171335	0.0186759	0.0363207	0.20422	0.0104409	0.011093	0.0135702	1.01646	0.000281424	0.000376113	0.000311773	0.875731	0.0096974	0.164011	0.00889855	0.0497594	0.0957416	0.192477	1.78886	0.0069213	0.00610702	0.000715158	0.127149	0.00936161	0.0343105	0	0	0	0.00450842	0.084317	0	0.118455	0	0.0136389	0.00275787	0.384349	0.586763	0.147976
2019-07-10 10:00:29	5.92521	3.36164	2.23633	1.4777	1.86577	0.519918	0.038447	0.133627	0.12874	0.083333	0.0929459	0.0336856	0.0332134	0.0598337	0.210925	0.0132459	0.0110283	0.00923119	1.60837	0.0353333	0.000359129	0.000177307	2.00115	0.019706	0.189961	0.0159688	0.100215	0.118236	0.26187	2.10179	0.00542795	0.00254154	0.000831845	0.43253	0.0110557	0.047403	0.127309	0	0.0429736	0.00696803	0.211334	0	0.172218	0	0.0103679	0.00244616	0.625921	0.988829	0.130066
2019-07-10 11:00:29	6.38973	2.75666	2.0129	1.64707	2.0024	0.608994	0.0449873	0.191029	0.196083	0.132472	0.1878	0.0440192	0.0406918	0.0742026	0.209534	0.0171956	0.0129945	0.00942908	1.93817	0.00226965	0.000168206	0.000247551	1.91537	0.00470538	0.225646	0.0270835	0.0678131	0.129846	0.339834	2.22076	0.00575578	0.000441177	0.000580137	0.308623	0.0141712	0.0425908	0.208104	0	0.104528	0.0071063	0.327611	0	0.192513	0	0.00960596	0.00253942	0.649773	0.753366	0.146848
2019-07-10 12:00:29	4.7814	2.18046	1.79934	1.20155	1.04568	0.35381	0.0298343	0.0613829	0.102554	0.074675	0.158901	0.0277077	0.0277488	0.0688229	0.239825	0.0168343	0.0118198	0.011753	0.839446	0.0291345	0.000183543	0.000541811	1.35113	0.00225021	0.122304	0.00760098	0.0416769	0.0723313	0.319574	1.70371	0.00544262	0.000548899	0.000536991	0.153149	0.0127763	0.0764491	0.03331	0	0	0.0140435	0.688488	0	0.825996	0	0.0101142	0.00263798	0.470558	1.52915	0.149203
2019-07-10 13:00:29	3.79953	2.08397	1.77625	0.795455	1.21535	0.354569	0.0290657	0.0398255	0.0483554	0.00811665	0.0504148	0.0164126	0.0116986	0.0558521	0.207084	0.0119372	0.0103686	0.0112859	0.446201	0.0187178	0.000174083	0.000104256	1.25776	0.0121061	0.133167	0.0111829	0.0751833	0.0754087	0.229808	1.23389	0.006802	0.00110576	0.000550527	0.14781	0.0109989	0.0781624	0	0	0.00778491	0.00577382	0.261808	0	0.0887607	0	0.00843528	0.00264838	0.55766	0.419896	0.133156
2019-07-10 14:00:29	3.22266	1.43605	1.38566	0.579281	1.21096	0.317443	0.0407549	0.0457665	0.0441583	0.028156	0.0296759	0.00897684	0.00618315	0.0546356	0.211052	0.0102794	0.00944032	0.00908609	0.299285	0.000659853	0.000154481	0.000131372	0.611432	0.000904217	0.120971	0.00905393	0.0412618	0.0720267	0.213711	1.03995	0.00760569	0.000772594	0.000533783	0.162773	0.00760334	0.0417245	0	0	0	0.00613369	0.23653	0	0.0829632	0	0.00914036	0.00267539	0.412527	0.344628	0.129209
2019-07-10 15:00:29	3.16013	1.79849	1.34454	0.534871	1.0944	0.260128	0.0327172	0.0267295	0.0256381	0.0242067	0.0291178	0.0125612	0.0136383	0.0528668	0.207019	0.00947156	0.00909895	0.00908639	0.301029	0.00141249	8.63423e-05	0.000145508	0.776602	0.00462506	0.0936608	0.0132456	0.0798423	0.0568544	0.212414	1.08042	0.00639268	0.000663512	0.00049023	0.0881931	0.010432	0.0752459	0	0	0	0.00574426	0.215865	0	0.140149	0	0.00778028	0.00249577	0.524819	0.294815	0.125569
2019-07-10 16:00:29	2.79179	1.16086	1.34787	0.480322	1.06133	0.246417	0.0322005	0.00701575	0.0131411	0.0257218	0.0353017	0.0198231	0.0183601	0.0513954	0.209982	0.0113771	0.00949252	0.00517001	0.420579	0.0038947	8.73723e-05	0.000251979	0.648275	0.00237647	0.0904399	0.0129996	0.0442931	0.0572293	0.218964	1.21032	0.00684399	0.000368487	0.000485828	0.129193	0.00727079	0.00132247	0.243042	0	0	0.00671813	0.207102	0	0.33339	0	0.00814789	0.0026524	0.524734	0.351375	0.133833
2019-07-10 17:00:29	3.70615	2.19161	1.54611	0.646283	1.07869	0.303352	0.0280273	0.0555746	0.0512366	0.0343623	0.0575199	0.0154762	0.0157235	0.0394105	0.209306	0.0141656	0.0102444	0.00575467	0.624305	0.000463293	0.000133827	0.000220218	0.866665	0.00259892	0.112926	0.0152244	0.0539969	0.0653511	0.192754	1.62503	0.00689997	0.00742714	0.000384143	0.115605	0.00841611	0.0358892	0.320572	0	0	0.00635204	0.147699	0	1.38909	0	0.0067547	0.00220704	0.461286	0.369824	0.137401
2019-07-10 18:00:29	4.26147	3.35779	2.11381	1.92521	1.45406	0.364332	0.0410962	0.147914	0.143579	0.0988377	0.160868	0.0486079	0.0490123	0.0694161	0.214177	0.0157117	0.0113145	0.00543793	3.61728	0.0050571	0.00024409	0.000228226	1.01814	0.00613759	0.167668	0.0274608	0.050884	0.0878988	0.19786	2.82028	0.00530184	0.00651534	0.000659081	0.319161	0.0130685	0.082639	0.171203	0	0.0536122	0.0179382	0.18869	0	0.884414	0	0.00805386	0.00236603	0.739443	0.968531	0.161056
2019-07-10 19:00:29	5.52652	3.41693	2.37611	1.43345	2.05768	0.530359	0.0658797	0.0654321	0.22949	0.167347	0.246582	0.101667	0.108458	0.116611	0.236851	0.0401366	0.017398	0.00784327	2.59778	0.00112703	0.000143442	0.00200894	1.74065	0.0162081	0.196662	0.0369789	0.086069	0.142078	0.384465	2.85992	0.00630904	0.00562628	0.00190485	0.331219	0.0617999	0.00452779	0.484327	0	0.278489	0.0134985	0.403088	0	0.871527	0	0.0120918	0.00221311	0.900409	1.55474	0.231034
2019-07-10 20:00:29	4.38516	3.40001	1.92539	0.845939	1.48892	0.353047	0.0356548	0.123168	0.121437	0.0609053	0.0887072	0.0393089	0.0377986	0.0698901	0.214438	0.0187141	0.0114309	0.00975644	1.09811	0.00393381	0.000133349	0.000881678	1.14653	0.0164012	0.135959	0.0197828	0.0445753	0.0793955	0.19431	1.67464	0.00659929	0.00496088	0.00074174	0.202079	0.0176368	0.0457418	0.10684	0	0.0143666	0.00800099	0.225354	0	1.13398	0	0.00842912	0.00231134	0.658408	0.51541	0.143694
2019-07-10 21:00:29	3.98057	2.11351	1.56813	0.624285	1.39356	0.331599	0.0348349	0.0732283	0.0796856	0.0298998	0.0382782	0.0153637	0.0227703	0.0556352	0.217045	0.0133092	0.0089367	0.00610147	0.715303	0.000322557	8.0896e-05	0.00042143	0.9102	0.000675056	0.120743	0.0166615	0.0205215	0.0770091	0.192267	1.35048	0.00711292	0.00819256	0.000707835	0.170739	0.00867121	0.0371007	0	0	0.0223683	0.00554436	0.187715	0	0.222342	0	0.00680679	0.00207776	0.643317	0.395154	0.124154
2019-07-10 22:00:29	4.10536	1.78968	1.58573	0.676455	1.29133	0.32795	0.0553715	0.0670451	0.0662433	0.0443574	0.0669257	0.0210317	0.0195425	0.0537412	0.212593	0.0132075	0.00924626	0.00828029	0.897464	0.0138335	0.000126283	0.0179994	1.01744	0.00769293	0.129601	0.0171566	0.0102337	0.0772417	0.193876	1.39789	0.00663062	0.000515447	0.000742031	0.167239	0.0129883	0.0517214	0	0	0.0139274	0.00546361	0.170277	0	0.176402	0	0.00665601	0.00215012	0.693452	0.53813	0.129243
2019-07-10 23:00:29
2019-07-11 00:00:29	4.75925	1.66021	1.9749	0.777593	1.70988	0.396501	0.0400114	0.0676252	0.0652642	0.00150863	0.0652397	0.017999	0.0141669	0.0534293	0.208772	0.0142853	0.0119866	0.00882925	1.39699	0.000240244	0.000227759	0.000525317	1.32347	0.00334033	0.130714	0.0192779	0.0068177	0.0764365	0.19444	1.36858	0.00628834	0.010487	0.00101733	0.175346	0.0148386	0.0507802	0	0	0.054386	0.00822083	0.188466	0	0.114032	0	0.0128497	0.00623101	1.15067	0.482724	0.153292
2019-07-11 01:00:29	4.77567	1.67754	1.77988	0.820188	1.3124	0.366122	0.129813	0.0980566	0.10826	0.0432798	0.0968024	0.0291141	0.0281852	0.0593059	0.210069	0.0177352	0.0137796	0.0119231	1.63922	0.000405887	0.000177435	0.000201259	1.10509	0.00263873	0.161465	0.0236579	0.0140076	0.096018	0.269748	1.67664	0.00723576	0.00888501	0.00130986	0.292374	0.00975695	0.00503213	2.30644	0	0.184177	0.0080049	0.262594	0	0.413398	0	0.0129558	0.0035445	1.12193	0.667904	0.136565
2019-07-11 02:00:29	4.37755	1.41134	1.81426	0.681326	1.49792	0.302587	0.0439167	0.0492615	0.0547872	0.0324471	0.0490925	0.0159178	0.013138	0.0492572	0.209344	0.0127076	0.0101874	0.00730832	1.38259	0.000481898	0.000198421	0.00029186	1.17009	0.00449826	0.115839	0.0146461	0.00460774	0.0676955	0.192197	1.32057	0.00723961	0.0127006	0.00083219	0.25289	0.0147245	0.000946119	0.344466	0	0.146551	0.0058873	0.205511	0	0.11805	0	0.0108773	0.00291862	1.24705	0.41492	0.120178
2019-07-11 03:00:29	4.49854	1.3062	1.83366	0.619464	1.56513	0.163495	0.0309651	0.0266898	0.0285956	0.00107022	0.0327914	0.0131089	0.0110761	0.0474374	0.206919	0.0115357	0.00927638	0.00854564	1.4756	0.000669674	5.01126e-05	0.000170273	1.03339	0.0126399	0.105969	0.0131777	0.00304886	0.0619134	0.191256	1.07381	0.00744812	0.0137365	0.000785763	0.209756	0.0103942	0.0700418	0.0940501	0	0.173165	0.00597863	0.204137	0	0.113264	0	0.00945872	0.00264117	1.43459	0.421215	0.115535
2019-07-11 04:00:29	4.05716	1.26543	1.82775	0.532295	1.78604	0.294729	0.0267749	0.0341268	0.0317516	0.0234958	0.0469348	0.0121003	0.00821589	0.0435495	0.20529	0.0107593	0.00864702	0.00979067	1.12527	0.00084755	0.000177065	0.000339518	1.16185	0.00115541	0.114212	0.0132092	0.0031226	0.062899	0.191805	1.49113	0.0070634	0.0146239	0.000836572	0.173856	0.0180283	0.000298851	0	0	0.160914	0.00586901	0.202403	0	0.0780573	0	0.00911527	0.00246599	1.31938	0.467009	0.115588
2019-07-11 05:00:29	4.05742	1.25453	1.57642	0.522463	1.61311	0.318286	0.0327287	0.003805	0.00362459	0.00163387	0.0522566	0.0120828	0.0106506	0.0445109	0.209493	0.0103239	0.0083592	0.00640943	1.18243	0.00043436	0.000132042	0.000259122	0.780426	0.00575876	0.110867	0.0127078	0.00268789	0.0681637	0.229479	1.28486	0.00689051	0.0155864	0.000878291	0.314957	0.010437	0.00124389	0.27485	0	0.188022	0.00597177	0.206308	0	0.121945	0	0.00815619	0.0024161	1.52901	0.548799	0.110504
2019-07-11 06:00:29	4.25787	1.51119	1.53945	0.541057	1.57496	0.204252	0.0305611	0.0127961	0.0343412	0.0231834	0.0332774	0.0113499	0.00836449	0.0448581	0.208611	0.00961075	0.00783513	0.0087289	1.08517	0.0029593	0.000503298	0.000204583	1.05137	0.00630868	0.0757738	0.0131924	0.00347527	0.0441313	0.192278	1.37816	0.00670565	0.0140751	0.000724781	0.262239	0.0107895		0.112382	0	0.130279	0.00572194	0.198362	0	0.110607	0	0.0067712	0.00229	1.47386	0.436324	0.106821
2019-07-11 07:00:29	5.15298	3.47495	1.52748	0.792022	1.30317	0.343449	0.0290908	0.0372032	0.0384677	0.00187532	0.0541227	0.018753	0.016843	0.050262	0.209991	0.0101107	0.00819688	0.00886338	1.37518	0.00345535	0.000164554	0.000234806	0.897009	0.00964027	0.129287	0.0265592	0.0306707	0.0775921	0.231099	2.60196	0.00710038	0.000494302	0.000766578	0.17347	0.0156398	0.00217854	0.0199266	0	0.117216	0.00550759	0.185005	0	0.0911642	0	0.00729288	0.00218743	1.47417	0.442128	0.111308
2019-07-11 08:00:29	5.50251	2.80399	1.38843	0.832981	1.63816	0.41634	0.0259469	0.0438555	0.0498035	0.0106385	0.0444261	0.024922	0.0181711	0.0566648	0.211106	0.0126561	0.00842107	0.00747299	1.20991	0.00624353	0.000253652	0.000279334	0.860681	0.0047125	0.59639	0.0114575	0.0464444	0.0764772	0.191978	2.38865	0.00744706	0.0114203	0.0004877	0.17913	0.0130265	0.0429287	0	0	0.151764	0.00514703	0.241766	0	0.0724694	0	0.00611411	0.00223564	1.43615	0.421738	0.112008
2019-07-11 09:00:29	7.16524	5.41325	1.76947	1.42656	1.60359	0.459465	0.0351682	0.116003	0.109884	0.0499532	0.122284	0.0267876	0.0287506	0.0713378	0.214235	0.0152876	0.00969497	0.0101112	1.19139	0.00179558	0.000254755	0.000540105	0.885916	0.00969375	0.16813	0.0285667	0.100583	0.0969068	0.284698	1.8903	0.00738709	0.000516655	0.000613712	0.250491	0.0220962	0.0706734	0.233923	0	0.172866	0.00590214	0.2339	0	0.176109	0	0.00594371	0.0022884	1.27579	0.406336	0.118803
2019-07-11 10:00:29	7.71543	5.10663	1.8317	1.53207	1.50326	0.4671	0.040562	0.0928366	0.083166	0.0487747	0.0987646	0.028114	0.0252201	0.0794899	0.216828	0.0153144	0.0101182	0.00667267	0.92145	0.00318796	0.000233528	0.000781382	0.828942	0.00550136	0.1697	0.0212218	0.0792597	0.0979095	0.270717	1.39808	0.00760592	0.000723674	0.000756234	0.238489	0.0168905	0.0950385	0.0297831	0	0.200306	0.00585566	0.224225	0	0.117598	0	0.00708784	0.00240918	1.24179	0.37293	0.122105
2019-07-11 11:00:29	7.57291	4.81684	1.80412	1.39636	1.78611	0.384629	0.0426521	0.100057	0.106356	0.00790965	0.122921	0.0240344	0.014913	0.0779073	0.21389	0.0124014	0.00858851	0.0083019	0.843103	0.00511152	0.000552187	0.000268106	0.753803	0.00231421	0.143347	0.0160438	0.0862659	0.0793704	0.278822	2.1422	0.00764178	0.000534872	0.00059457	0.247302	0.0172358	0.0994268	0.324397	0	0.116551	0.00660266	0.316213	0	0.296665	0	0.00725564	0.00227022	1.06268	0.344157	0.120092
2019-07-11 12:00:29	8.84958	5.86597	1.81716	1.6247	2.04431	0.34865	0.0321374	0.0779342	0.0763985	0.0476241	0.091628	0.0197503	0.0172682	0.0565228	0.213633	0.0118655	0.00854149	0.00752439	0.919736	0.00388143	0.000162017	0.000249943	0.859976	0.00215487	0.135562	0.0248217	0.17355	0.0783973	0.264439	8.71822	0.00179717	0.00962591	0.000476795	0.15162	0.0111987	0.0681936	0.0949718	0	0	0.0051237	0.160123	0	0.186458	0	0.00672603	0.00204188	0.695773	0.38167	0.127637
2019-07-11 13:00:29	7.14598	4.56958	1.66816	1.23776	1.39785	0.419238	0.0416799	0.0639573	0.0615913	0.029973	0.0936325	0.0164119	0.0109977	0.0694101	0.205311	0.0100362	0.00811743	0.00597697	0.339013	0.000783924	0.000394765	0.000362608	0.00517131	0.004951	0.143746	0.0173285	0.111052	0.0847808	0.258605	4.36464	0.00672564	0.00840819	0.00069237	0.168768	0.0159818	0.0850491	0.0678878	0	0	0.00550908	0.180354	0	0.0990744	0	0.00652327	0.00233298	0.720839	0.28662	0.12228
2019-07-11 14:00:29	5.72042	3.26101	1.36984	0.96427	1.55413	0.353077	0.041938	0.0783576	0.0742458	0.0455951	0.0890372	0.0212192	0.0147192	0.0739784	0.209084	0.0112592	0.00971025	0.00895702	0.34337	0.00132973	0.000105179	0.000394597	0.00614882	0.0141389	0.135905	0.0298025	0.146139	0.0786572	0.261673	2.38223	0.00744885	0.0085865	0.000733722	0.200803	0.0149074	0.0698388	0.507391	0	0.0379397	0.00582204	0.19824	0	0.142986	0	0.00710562	0.00224544	0.632998	0.315204	0.129253
2019-07-11 15:00:29	6.33465	3.9656	1.6137	1.09496	1.68905	0.389439	0.04147	0.0640284	0.065536	0.0388683	0.0655544	0.0203014	0.0184351	0.0724256	0.210148	0.0159629	0.010877	0.00779636	0.357569	0.00135951	9.39743e-05	0.000515853	0.000231164	0.0179107	0.134366	0.0274016	0.0901539	0.0843599	0.235163	1.82478	0.00714494	0.000613991	0.000669484	0.207488	0.0134995	0.100374	0.119452	0	0.0578574	0.00552635	0.202875	0	0.106779	0	0.00618083	0.00221951	0.668644	0.311171	0.137307
2019-07-11 16:00:29	6.14432	3.99773	1.73701	1.08071	1.31139	0.363099	0.0432195	0.0726009	0.0697333	0.0387502	0.069122	0.0223911	0.0164327	0.0712122	0.210282	0.0165932	0.0106	0.00383933	0.479999	0.0387382	0.00033837	0.000501878	0.713651	0.0130416	0.135824	0.0134796	0.0808085	0.0775425	0.241894	1.48343	0.0074291	0.00657591	0.000633542	0.217388	0.0109902	0.0682205	0.853631	0	0.0614637	0.00607058	0.187841	0	0.108506	0	0.00609123	0.00210274	0.718741	0.319958	0.135376
2019-07-11 17:00:29	5.67114	3.23768	1.65123	0.952792	1.72967	0.377315	0.044882	0.0162129	0.0154441	0.0450012	0.0733695	0.0239903	0.0239682	0.0716095	0.207416	0.0210078	0.0143133	0.00880823	0.499193	0.00324664	0.000289113	0.000855064		0.00236529	0.138467	0.019156	0.109184	0.0823293	0.247444	1.28471	0.00739193	0.0110505	0.000584613	0.231034	0.012978	0.0875943	1.89239	0	0.0653814	0.00614329	0.205749	0	0.155279	0	0.00673158	0.00227924	0.75536	0.34538	0.140547
2019-07-11 18:00:29	5.23071	3.01309	1.52021	0.000251874	1.64982	0.322251	0.0421769	0.0734353	0.0772627	0.0505591	0.0696432	0.0219208	0.0180631	0.0654131	0.209317	0.0130067	0.00929363	0.00732751	0.470219	0.00360089				0.00699305	0.120019	0.02215	0.147894	0.0732928	0.242837		0.00699568	0.0122612	0.000660855	0.21135	0.0367742	0.0631744	0.400673	0	0.164683	0.00529481	0.28623	0	0.0749988	0	0.00509071	0.00203908	0.70355	0.294167	0.129309
2019-07-11 19:00:29	4.91313	3.09279	1.53977	0.716997	1.73825	0.282017	0.0348894	0.0705971	0.0736857	0.0495603	0.0653039	0.0206782	0.0152679	0.0645461	0.207912	0.015853	0.00999082	0.00760267	0.492978	0.000781886	0.000506685			0.0116571	0.101799	0.017001	0.102352	0.0603854	0.193086	1.68818	0.00763118	0.000556378	0.000646647	0.212507	0.0522406	0.0665375	0.119081	0	0.124928	0.00535656	0.229598	0	0.0594881	0	0.00570416	0.00212043	0.699861	0.282427	0.131164
2019-07-11 20:00:29	4.63563	2.85491	1.49435	0.00025539	1.53132	0.306624	0.0425628	0.0775921	0.0788122	0.0461849	0.0614096	0.0199166	0.0161424	0.062755	0.210642	0.0188499	0.0110589	0.00825649	0.488713	0.000402904				0.0184053	0.114546	0.0133026	0.0571816	0.0670941	0.23009		0.00716715	0.0074613	0.000774563	0.271545	0.0242039	0.0642079	0.393175	0	0.141705	0.00545643	0.21672	0	0.613807	0	0.0050192	0.00182107	0.603578	0.31867	0.123417
2019-07-11 21:00:29	4.82209	3.0914	1.46231	0.000132738	1.56006	0.436967	0.0340161	0.0564656	0.0550968	0.0375603	0.0603674	0.020259	0.015766	0.0616203	0.209724	0.0161495	0.010504	0.00784015	0.45838	0.00538233				0.00166973	0.135562	0.0119824	0.0246233	0.091966	0.233968		0.00728645	0.00068877	0.000554011	0.194641	0.0195711	0.0630357	0.103029	0	0.115394	0.00545353	0.186722	0	0.552538	0	0.00473216	0.00202546	0.598067	0.284343	0.123757
2019-07-11 22:00:29	4.84475	2.95776	1.44085	0.840259	1.52938	0.433259	0.0439236	0.0639111	0.0583332	0.0369617	0.0672018	0.0204127	0.0206145	0.0610943	0.210995	0.0133113	0.00954399	0.00758751	0.518695	0.000364188	0.000106627	0.000168093	0.73649	0.015858	0.150782	0.0196904	0.0128112	0.0901164	0.192978	1.95461	0.00754857	0.000467582	0.000773782	0.203474	0.0295134	0.0726567	0.010318	0	0.133389	0.00562446	0.173973	0	1.21987	0	0.005246	0.00179635	0.577127	0.348822	0.114169
2019-07-11 23:00:29
2019-07-12 00:00:29	5.03201	2.66796	1.84263	1.06359	2.38803	0.563578	0.0325178	0.108546	0.10713	0.00307384	0.0992322	0.0268234	0.0243927	0.0671367	0.206839	0.0138556	0.0115936	0.0103328	0.465031	0.000156711	0.000176935	0.000254413	1.19455	0.000653084	0.16953	0.0208328	0.0093882	0.129193	0.196972	2.13095	0.00697968	0.000771982	0.000649525	0.251189	0.0299366	0.0619739	0.0682042	0	0.097726	0.00839708	0.173104	0	1.3819	0	0.014355	0.0057141	0.69908	0.453824	0.144282
2019-07-12 01:00:29	5.1884	2.61928	1.55499	0.978932	1.91124	0.454813	0.0377429	0.0839066	0.0805034	0.0256825	0.0771384	0.0280564	0.0250162	0.0647304	0.207215	0.0135128	0.0106801	0.00775901	0.622434	0.000323238	0.000247723	0.000401585	1.00175	0.00571721	0.182977	0.0200037	0.00747268	0.113837	0.193212	1.95437	0.00746542	0.00773256	0.000936308	0.214064	0.0143838	0.0706799	0.278686	0	0.102031	0.0108198	0.180024	0	5.89925	0	0.0104072	0.00324538	0.647695	0.485228	0.1248
2019-07-12 02:00:29	5.25014	2.62273	1.64293	0.908916	1.89392	0.494842	0.0357663	0.079982	0.0822943	0.0204426	0.151797	0.0235092	0.0203971	0.0650436	0.212013	0.0147395	0.0111581	0.0103893	0.652175	0.000670773	5.55117e-05	0.000773107		0.00276912	0.196168	0.015888	0.00867408	0.119018	0.311623	2.21708	0.00769406	0.000602002	0.00117088	0.208908	0.0415368	0.00443379	1.64921	0	0.134075	0.0150874	0.21296	0	19.5603	0	0.00925369	0.00268914	0.689127	0.481278	0.112865
2019-07-12 03:00:29	5.07237	2.61008	1.7685	1.0282	2.15603	0.533935	0.0334279	0.0851323	0.0832408	0.00689058	0.108893	0.0258492	0.025902	0.0661612	0.2113	0.0134835	0.00993855	0.00717827	0.428893	0.00121482	0.000110887	0.000630326		0.00792865	0.203442	0.0180113	0.00553601	0.122654	0.27667	4.61094	0.00749399	0.00640604	0.00172453	0.246395	0.127855	0.062723	0.25379	0	0.0772397	0.00820165	0.194371	0	4.34059	0	0.00850083	0.00225236	0.638815	0.412971	0.118518
2019-07-12 04:00:29	5.60272	2.85102	1.84647	0.937932	2.17055	0.578442	0.0296813	0.0815604	0.0808299	0.0193106	0.0968524	0.0195737	0.0168289	0.0605757	0.204286	0.012836	0.00936849	0.00727861	0.517753	0.000594059	0.000201822	0.000832284	0.0773865	0.000926715	0.194714	0.019903	0.00498298	0.11734	0.261702	5.18392	0.00699297	0.0104815	0.00211166	0.297531	0.136895	0.0695199	0.275046	0	0.121078	0.00670503	0.185795	0	2.37799	0	0.00819192	0.00229595	0.701417	0.44504	0.112858
2019-07-12 05:00:29	5.55382	2.77406	1.81321	0.966276	2.1641	0.567942	0.032888	0.0890418	0.0897968	0.00371428	0.116276	0.0245621	0.0209856	0.0632369	0.204974	0.0127443	0.010123	0.0077785	0.819967	0.00032706	0.000174202	0.000206958	0.750534	0.00756744	0.214112	0.00929327	0.00591125	0.131309	0.281359	2.34151	0.00724526	0.00042832	0.0011147	0.281383	0.0582635	0.0618517	0.856598	0	0.148622	0.00711441	0.180321	0	1.60777	0	0.00794301	0.00203828	0.814009	0.473649	0.117975
2019-07-12 06:00:29	6.04548	3.17304	2.10934	1.34697	2.79445	1.10079	0.0596535	0.0580087	0.184633	0.0511018	0.152619	0.0518674	0.0534292	0.0780112	0.213787	0.0159645	0.0113501	0.010211	1.48571	0.00102077	0.000129389	0.000293893	0.0064302	0.0101743	0.898692	0.0298161	0.0171137	0.194642	0.198444	2.77948	0.0070446	0.00057696	0.00139287	0.341135	0.0262441	0.0659168	0.673786	0	0.194693	0.00779192	0.185642	0	2.19557	0	0.0076525	0.00190232	0.92633	0.698582	0.149208
2019-07-12 07:00:29	8.48984	3.95009	2.45737	1.92389	4.06797	1.71561	0.0627726	0.444682	0.426207	0.0185113	0.357961	0.118239	0.121442	0.117776	0.225437	0.0281446	0.0205938	0.0166239	2.78491	0.558933	0.0103684	0.159489	1.90505	0.0158084	0.646027	0.062267	0.141167	0.0538022	0.222524	4.05565	0.00691795	0.0113838	0.000172499	0.348653	0.0460422	0.00427343	0.763428	0	0.265633	0.0213993	0.232249	0	1.62344	0	0.00956036	0.00180416	1.30043	1.50656	0.186409
2019-07-12 08:00:29	6.6647	3.93269	2.16629	1.42958	2.94222	0.966078	0.0444529	0.201434	0.192015	0.162988	0.181097	0.0610486	0.0615004	0.0849076	0.21766	0.0174882	0.0128914	0.00989051	1.69795	0.000384261	8.47656e-05	0.00864804	1.22264	0.00457537	0.31567	0.0282723	0.112009	0.189888	0.200388	2.40907	0.007338	0.00955198	0.000937182	0.309231	0.0256533	0.0752016	0.236007	0	0.0923714	0.00746531	0.173996	0	0.556063	0	0.0072975	0.00205049	0.979382	0.759578	0.148717
2019-07-12 09:00:29	6.43161	3.95962	1.98579	1.47084	2.43104	0.693118	0.0390183	0.108095	0.103822	0.0815662	0.101552	0.0408638	0.0415465	0.0804114	0.216748	0.0165574	0.0111686	0.0112395	1.06362	0.0101161	0.00012221	0.000357398	0.974587	0.00196034	0.246852	0.0154808	0.113687	0.14524	0.194305	1.6979	0.00718065	0.00731676	0.000733543	0.246603	0.0151306	0.0685534	0.00347517	0	0.0467154	0.00565204	0.174401	0	0.358982	0	0.00630455	0.00216569	0.818428	0.540168	0.131707
2019-07-12 10:00:29	5.32384	3.0384	1.67328	0.94841	2.17388	0.56737	0.0434427	0.0815289	0.0808059	0.0549865	0.0977624	0.0310277	0.0266694	0.0720943	0.212665	0.0128437	0.00964227	0.00684642	0.717846	0.00123196	0.000120531	0.0001593	0.00146536	0.00461783	0.198593	0.0174827	0.0880122	0.116985	0.194398	1.22793	0.00779187	0.00968429	0.000694832	0.209237	0.0192697	0.074676	0.0624187	0	0.304363	0.00616539	0.173385	0	1.37099	0	0.00550039	0.00199737	0.845198	0.452553	0.126334
2019-07-12 11:00:29	4.64586	2.46785	1.46454	0.680512	1.95026	0.460913	0.0396316	0.0513386	0.0388277	0.0352836	0.0609221	0.0177281	0.0139647	0.0635723	0.207662	0.0097395	0.00845536	0.00517003	0.418606	0.000601157	7.31752e-05	0.000126357	0.0218333	0.00201251	0.155691	0.020365	0.0439749	0.0922722	0.193344	1.41181	0.00744826	0.000513468	0.000557099	0.16751	0.0175514	0.0700867	0.00565878	0	0.0310433	0.0058452	0.162968	0	0.819923	0	0.00510132	0.0020079	0.720761	0.359167	0.121877
2019-07-12 12:00:29	3.6223	1.89397	1.24089	0.485625	1.79391	0.39295	0.0374984	0.0366889	0.0354259	0.0240043	0.0421867	0.0134571	0.00845184	0.0590659	0.206387	0.00905495	0.0083383	0.00612249	0.29014	0.000262129	0.000259496	0.000391829	0.000168351	0.0015008	0.136298	0.0160895	0.0687168	0.0822986	0.192495	0.851142	0.00751821	0.00085601	0.00054789	0.21788	0.015168	0.070245	0	0	0.00311811	0.00560708	0.161939	0	0.417815	0	0.00551364	0.00195976	0.674146	0.306129	0.126154
2019-07-12 13:00:29	3.28509	1.58672	1.05229	0.414677	1.41184	0.313476	0.0286364	0.0282473	0.0254442	0.0248619	0.0411895	0.0146109	0.00817157	0.0579807	0.206392	0.00881774	0.00813407	0.00537212	0.244338	0.00217566	0.000203901	0.000178924		0.000669467	0.117144	0.0153709	0.0631961	0.0665326	0.194323	0.681341	0.00804333	0.000807526	0.000419374	0.201037	0.014818	0.0627433	0	0	0	0.00567605	0.161862	0	0.264232	0	0.00522796	0.00199866	0.625637	0.259616	0.127203
2019-07-12 14:00:29	2.57818	0.802442	1.11828	0.322436	1.60192	0.375614	0.0390641	0.041178	0.0444812	0.00116475	0.037577	0.0176594	0.0164213	0.0583463	0.204412	0.00978594	0.00909445	0.00799916	0.30627	0.0118014	0.000554962	0.000116503	0.0308428	0.00588538	0.134657	0.0145619	0.0745629	0.0765751	0.192157	0.590501	0.00766989	0.000654557	0.000481912	0.203494	0.00822747	0.0491582	0.033473	0	0	0.00617407	0.196978	0	0.481806	0	0.00521271	0.00201663	0.570584	0.300211	0.140157
2019-07-12 15:00:29	2.06473	1.29923	1.0499	0.244101	1.55184	0.330487	0.0430605	0.0157276	0.00173104	0.0218258	0.0310722	0.0136962	0.00860917	0.0531866	0.206059	0.00983183	0.0096266	0.0064507	0.264007	0.00192197	0.000148636	0.000167835		0.00500933	0.120035	0.0288838	0.0634718	0.0685159	0.191939	0.00220362	0.00828118	0.000624759	0.000755505	0.1669	0.015094	0.0471584	0	0	0.00602413	0.0113101	0.170701	0	0.215629	0	0.00494606	0.00199246	0.523354	0.249254	0.143525
2019-07-12 16:00:29	2.32854	0.813858	1.31784	0.794573	2.36741	0.629782	0.0411635	0.151164	0.140634	0.0391675	0.0830868	0.0281363	0.0262553	0.0841344	0.206252	0.0114252	0.00978844	0.00563997	0.564087	0.00189415	0.000323646	0.000405593	0.000503024	0.00720839	0.199865	0.0258127	0.232275	0.131465	0.19405	0.808866	0.00735011	0.000830368	0.000632336	0.231935	0.0117931	0.0327572	0	0	0.00679637	0.011534	0.179164	0	0.982815	0	0.00544839	0.0019171	0.630817	0.410429	0.159922
2019-07-12 17:00:29	2.00624	0.81227	0.627955	0.348782	0.460307	0.0967	0.0177278	0.0170982	0.0317673	0.026153	0.0312965	0.020976	0.0238889	0.0712386	0.207052	0.0122842	0.0098103	0.00486285	0.694265	0.000547699	0.000425025	0.00587833	0.00105964	0.00644147	0.165752	0.00879742	0.112434	0.0204575	0.191292	1.19213	0.0042316	0.000860433	0.000371526	0.105104	0.0095234	0.0502561	0	0	0	0.018044	0.34475	0	1.16919	0	0.00690468	0.0021766	0.46058	1.08393	0.151904
2019-07-12 18:00:29	1.84796	1.14894	0.917338	0.280085	0.442748	0.0992097	0.0159364	0.0491239	0.0473853	0.032173	0.0354436	0.0147489	0.0130946	0.0428085	0.216866	0.00857269	0.00742205	0.00400547	0.485007	0.00759492	0.000260005	0.000132299	0.000869235	0.00420643	0.03026	0.00792749	0.114258	0.020055	0.192106	0.940686	0.0056473	0.00120273	0.000336375	0.119425	0.00843698	0.0409126	0	0	0	0.0132469	0.190042	0	0.772494	0	0.00593508	0.00171873	0.373231	0.495976	0.127882
2019-07-12 19:00:29	2.36461	1.68114	1.21135	0.426489	0.968483	0.115242	0.0208587	0.0372603	0.042361	0.0299777	0.0378774	0.0251031	0.0254443	0.047752	0.22885	0.0114611	0.00909499	0.00521685	0.72226	0.00511753	0.00030308	0.000256283	0.000173235	0.00679275	0.34923	0.0066981	0.0825622	0.0255365	0.220529	1.50842	0.00705623	0.000562483	0.00036756	0.0556447	0.0114263	0.0421788	0	0	0	0.0269631	0.31674	0	0.351987	0	0.00593606	0.00173641	0.39969	0.914471	0.119168
2019-07-12 20:00:29	2.99154	1.52209	1.36788	0.509396	1.24474	0.199817	0.0227304	0.14158	0.142131	0.0897714	0.0740546	0.0366857	0.0405002	0.0517779	0.218016	0.0110742	0.00825179	0.00749138	1.28319	0.0186819	0.000224715	0.000555658	0.0118886	0.00637226	0.0660185	0.00786002	0.0571951	0.0500712	0.196278	3.20789	0.00701541	0.00497433	0.0010772	0.12398	0.0120182	0.0328304	0	0	0	0.0139994	5.43006	0	0.767855	0	0.00603265	0.00152923	0.475912	1.1275	0.131734
2019-07-12 21:00:29	2.77731	1.13843	1.48453	0.649891	0.882161	0.246353	0.0244194	0.0570969	0.147291	0.0977568	0.0732491	0.0404496	0.0434247	0.0568677	0.249127	0.0138914	0.00895305	0.00676562	1.2666	0.00164206	0.000173839	0.0228946	0.000192081	0.0130693	0.0816386	0.0120162	0.0343929	0.0487292	0.19627	1.71716	0.00518823	0.0037018	0.000756814	0.157798	0.00957598	0.0342556	0	0	0	0.0108843	1.2759	0	0.290859	0	0.00729451	0.00154451	0.433755	1.27897	0.151641
2019-07-12 22:00:29	7.85683	2.66529	1.85438	1.51695	1.36941	0.347281	0.0466973	0.0873262	0.336924	0.224541	0.173372	0.0875328	0.0997503	0.0902517	0.21293	0.0471316	0.0112547	0.00941413	2.88169	0.0229658	0.000143761	0.000305034	0.0534615	0.00527494	0.452778	0.022856	0.0913562	0.0964905	0.202293	3.96212	0.00607931	0.000318176	0.00171046	0.259533	0.021269	0.0474781	0	0	0.0471355	0.00607707	0.139425	0	0.363331	0	0.00830397	0.00108917	0.688946	0.911646	0.484394
2019-07-12 23:00:29
2019-07-13 00:00:29	8.27882	4.03194	2.69076	2.66059	1.8101	0.71959	0.0356568	0.526979	0.503958	0.351037	0.243946	0.116126	0.125446	0.110649	0.233574	0.081162	0.0215906	0.023942	3.57347	0.970228	0.214187	0.311728	0.158635	0.051675	0.053423	0.075862	0.0836559	0.148308	0.232604	3.58174	0.0058898	0.00391551	0.000599734	0.36199	0.03441	0.0405135	0.00465086	0	0.311801	0.0101978	0.154126	0	0.17417	0	0.024402	0.00899566	0.852593	1.12825	0.806812
2019-07-13 01:00:29	5.63564	1.94544	2.0837	1.56685	2.07428	0.348598	0.0323968	0.0599217	0.166531	0.137111	0.115988	0.0623504	0.0647051	0.0713062	0.219629	0.0595881	0.0161669	0.0191582	1.92952	0.483502	0.129742	0.000225943	0.0940221	0.00147809	0.653785	0.0526767	0.0489349	0.135675	0.200952	2.07071	0.00614838	0.00414864	0.000819925	0.151906	0.018914	0.0371259	0	0	0.0747161	0.0138937	0.118592	0	0.485444	0	0.015785	0.00368726	0.571626	0.680063	0.507928
2019-07-13 02:00:29	5.48435	1.91372	2.3443	2.22337	1.07969	0.325663	0.0175092	0.0439098	0.0937349	0.0976202	0.079806	0.0654597	0.0572948	0.063627	0.235152	0.0222364	0.0150533	0.0228597	1.64269	0.378123	0.134306	0.0279756	0.096377	0.0242928	0.0461981	0.0837501	0.00698854	0.123876	0.200689	2.21835	0.00101386	0.000537236	0.000729346	0.0717786	0.0121415	0.0399295	0	0	0.0302766	0.0455755	0.332957	0	1.05659	0	0.014811	0.00281396	0.583474	1.7571	0.134332
2019-07-13 03:00:29	5.13124	1.63426	1.73043	0.894905	1.64199	0.54681	0.0368659	0.0436927	0.135778	0.0899558	0.112732	0.0396777	0.0386641	0.0614906	0.237281	0.0685761	0.0188638	0.0267328	2.02794	0.433024	0.00017275	0.0150535	0.995243	0.0300246	0.542009	0.021674	0.00177052	0.134697	0.201954	2.28813	0.00596314	0.00570527	0.000149578	0.319033	0.0218422	0.0428529	0.101767	0	0.0213901	0.0173826	0.110036	0	0.20535	0	0.00999952	0.00221449	0.555924	0.501267	0.422878
2019-07-13 04:00:29	7.30468	2.26117	1.95764	1.25478	1.30788	0.603156	0.0318479	0.0594505	0.228049	0.0521195	0.145129	0.0600545	0.0617514	0.0780168	0.239269	0.0276961	0.0201658	0.0279409	2.42056	0.237311	0.00210759	0.110729	0.0757219	0.00258632	0.432478	0.0286537	0.00321667	0.126885	0.203857	3.26687	0.0063577	0.00459868	0.000362927	0.382716	0.0476775	0.038348	0.0219063	0	0.0387926	0.0159457	0.127236	0	0.190314	0	0.0129906	0.00192507	0.741451	0.679412	0.170825
2019-07-13 05:00:29	7.01777	2.60168	2.02248	1.1829	0.874234	0.268837	0.0244375	0.0620936	0.153736	0.106234	0.125544	0.063222	0.0493674	0.0760987	0.244167	0.0882036	0.0297588	0.0335149	1.48096	0.360271	0.000211532	0.000516059	1.02591	0.0083168	0.280513	0.0206243	0.00175623	0.0669555	0.197842	3.52126	0.00547422	0.000298984	0.0010039	0.315552	0.027687	0.0420016	0.0792787	0	0.0297805	0.00886737	0.118328	0	0.11657	0	0.0110019	0.00157453	0.571129	0.581524	0.392049
2019-07-13 06:00:29	8.1874	2.79236	2.09426	1.28872	2.44937	0.980945	0.0596079	0.121298	0.262995	0.0484855	0.205019	0.0640212	0.0575869	0.0715441	0.238899	0.0233612	0.0182993	0.0309864	4.92632	0.79999	0.00102042	0.1204	0.0778568	0.0473099	0.822838	0.0531105	0.00637237	0.203837	0.205424	7.47298	0.000756013	0.00425056	0.000529387	0.321838	0.0223468	0.04062	0.209063	0	0.130153	0.0114928	0.158994	0	0.736019	0	0.011567	0.00145063	1.92471	0.77823	0.116455
2019-07-13 07:00:29	9.09497	2.9908	2.00018	1.26214	1.89882	0.336366	0.0248054	0.0430746	0.0957646	0.07933	0.116743	0.0922303	0.071424	0.0892277	0.288839	0.0260657	0.0184091	0.0318896	2.64014	0.61352	0.000564729	0.0219255	1.1475	0.00376113	0.646468	0.0154592	0.0665654	0.0454718	0.1959	4.70927	0.00624551	0.000510049	0.00015463	0.109806	0.0227372	0.0397939	0	0	0	0.0268233	0.255107	0	0.839366	0	0.0107269	0.00150967	0.756137	1.82787	0.131482
2019-07-13 08:00:29	9.15297	3.50774	2.24546	1.54632	1.25765	0.325707	0.00748811	0.0649345	0.212846	0.203129	0.381307	0.154864	0.152818	0.291561	0.360058	0.338461	0.125178	0.0504164	2.62068	0.594996	0.000616172	0.133536	0.0475257	0.00484001	0.435843	0.00782529	0.117914	0.04874	0.197016	6.76962	0.00359081	0.00399851	0.00116302	1.13537	0.0955385	0.00542114	0.0305124	0	0.115342	0.0283155	0.634097	0	0.38549	0	0.0129438	0.00145347	0.726047	3.31571	0.276396
2019-07-13 09:00:29	7.0244	3.54852	2.26699	1.36365	2.0847	0.748674	0.0513121	0.0819074	0.197523	0.199157	0.233429	0.0735411	0.078189	0.109476	0.289078	0.0487705	0.0285557	0.0224671	2.28002	0.0609726	0.000316623	0.00043118	0.046226	0.00269611	0.282113	0.017975	0.363865	0.168774	0.366695	12.627	0.00600146	0.000259777	0.00147786	0.892173	0.055284	0.0500779	0	0	0.156939	0.0162275	0.415074	0	0.699092	0	0.013664	0.0015401	0.656115	1.85542	0.186575
2019-07-13 10:00:29	4.38181	1.82579	1.64822	0.86775	0.580478	0.237585	0.0165788	0.0470266	0.0626754	0.085664	0.0886059	0.0366855	0.0382238	0.071811	0.21788	0.0227326	0.0150607	0.0207482	1.27026	0.00470149	0.000241841	0.000208804	0.000151299	0.00781617	0.198637	0.0140799	0.12833	0.0417113	0.195683	9.22659	0.00227747	0.001745	0.000740917	0.412432	0.0281786	0.0536289	0	0	0.0911084	0.00765752	0.129907	0	0.106883	0	0.0105241	0.00177162	0.485318	0.54473	0.163904
2019-07-13 11:00:29	3.66451	1.26755	1.3504	0.762112	2.06569	0.537091	0.0482599	0.146923	0.184369	0.127123	0.122339	0.0409932	0.0390709	0.0897204	0.229388	0.0680516	0.0321583	0.0155443	1.07084	0.00420205	0.000117265	8.45974e-05	0.0132765	0.00858077	0.203406	0.0326713	0.223373	0.118597	0.285938	5.42836	0.00661168	0.000472473	0.00110497	0.722339	0.0327336	0.0703336	0.0684943	0	0.158932	0.00736642	0.22165	0	0.137992	0	0.00765608	0.00149412	0.609274	0.624805	0.151712
2019-07-13 12:00:29	3.35645	1.235	1.30392	0.688822	0.820452	0.221736	0.021128	0.100565	0.0997513	0.094126	0.0778681	0.0364524	0.035946	0.0668242	0.236453	0.0214538	0.0136339	0.0136685	1.13248	0.00560637	0.000324758	0.000403193	0.0301644	0.0114495	0.0770245	0.0148825	0.133938	0.0435647	0.194919	3.60869	0.00503106	0.00439923	0.000631577	0.132838	0.0164773	0.05895	0	0	0	0.011937	0.206143	0	0.162805	0	0.00751798	0.00152337	0.477411	1.08979	0.157351
2019-07-13 13:00:29	3.32928	1.03583	1.20754	0.428786	0.998837	0.306461	0.0242007	0.0676906	0.050015	0.0287903	0.0479773	0.0180932	0.0156402	0.0528467	0.235917	0.011996	0.00955545	0.0085857	0.635818	0.00419124	0.000262929	0.000324093	0.000227412	0.00294957	0.102054	0.0177296	0.193479	0.058398	0.225759	2.2985	0.00560357	0.00166204	0.000737555	0.118607	0.0157501	0.0716945	0	0	0	0.021027	0.225463	0	0.272922	0	0.00678996	0.00147875	0.393791	0.894979	0.123547
2019-07-13 14:00:29	3.69565	0.879777	1.09041	0.438551	0.525782	0.125566	0.0164763	0.055005	0.0419174	0.0396028	0.0565873	0.0181073	0.0146072	0.0567972	0.221658	0.0127077	0.00956077	0.00663232	0.446761	0.00193921	0.000189732	0.000118042	0.000488711	0.00405458	0.172197	0.0129409	0.131944	0.022799	0.193017	2.05056	0.00374077	0.00277911	0.000524512	0.10537	0.0177112	0.0966134	0	0	0	0.0232227	0.231142	0	0.330449	0	0.00720708	0.00174096	0.416459	0.790026	0.139755
2019-07-13 15:00:29	3.64264	0.963139	1.29129	0.402637	0.919835	0.27692	0.0278875	0.0567211	0.0645043	0.0449367	0.054797	0.0181602	0.01573	0.0572022	0.238003	0.0116649	0.00973003	0.0103189	0.540756	0.00266934	0.000141032	0.00117566	0.000477096	0.0017819	0.099156	0.0204462	0.144949	0.0588191	0.230855	2.27121	0.00587493	0.00492005	0.000593954	0.162034	0.0145852	0.106913	0	0	0	0.036843	0.248801	0	0.353114	0	0.00620243	0.00162425	0.469121	0.932498	0.144612
2019-07-13 16:00:29	2.96121	0.674897	1.17342	0.400291	0.550517	0.0902969	0.00533283	0.0442229	0.0459363	0.0321765	0.0337161	0.0198966	0.0190729	0.0529892	0.209011	0.0142042	0.00967519	0.00784928	0.470883	0.00282178	8.7545e-05	0.00042515	0.00045291	0.00483591	0.197459	0.00433263	0.0510252	0.0153103	0.23803	1.73085	0.00245117	0.00101011	0.000265454	0.0990762	0.00899449	0.0634324	0	0	0	0.0185611	0.567187	0	0.061305	0	0.00654282	0.00149789	0.368622	0.638624	0.124237
2019-07-13 17:00:29	3.15747	1.89794	1.35153	0.661132	0.669573	0.205552	0.0173983	0.0319863	0.045601	0.0436336	0.0539664	0.0260731	0.0277515	0.0506566	0.212873	0.019531	0.0111425	0.0104273	0.882176	0.00870809	0.00018899	0.000760591	0.012579	0.00784861	0.0636066	0.0129905	0.134606	0.0399652	0.194693	1.93833	0.00528376	0.00131328	0.000589405	0.18014	0.0146589	0.0567379	0	0	0.0737239	0.00660333	0.188929	0	0.0409144	0	0.00602624	0.00142309	0.441691	0.353676	0.209997
2019-07-13 18:00:29	3.71106	2.76482	1.69684	1.50618	1.92155	0.789565	0.0573429	0.0874648	0.401938	0.264986	0.179686	0.075278	0.0818663	0.0833426	0.219512	0.0636101	0.0143839	0.0119113	1.07563	0.00260204	0.000104079	0.000741883	0.0532753	0.0054443	0.243213	0.0201878	0.307397	0.171734	0.321934	2.39044	0.00603894	0.00283555	0.000846283	0.232847	0.0112398	0.0663274	0	0	0.0599769	0.00652049	0.094266	0	0.0428932	0	0.00645765	0.00127624	0.615167	0.569929	0.517616
2019-07-13 19:00:29	3.66878	3.74011	1.65336	1.29636	1.42318	0.485571	0.0428005	0.189018	0.216909	0.145926	0.119323	0.0532742	0.0557338	0.0728181	0.224151	0.045754	0.01078	0.00768791	1.49793	0.0053225	0.00011169	0.000221398	0.000511971	0.0172616	0.185127	0.0198703	0.437514	0.105795	0.195767	2.72143	0.00541686	0.00432358	0.000791673	0.382611	0.0109177	0.0687945	0	0	0	0.00617088	0.0916856	0	0.0301777	0	0.00472635	0.00127807	0.571075	0.539854	0.600714
2019-07-13 20:00:29	3.9241	1.42446	1.13759	0.709881	1.0211	0.413839	0.0356558	0.12134	0.110026	0.0778339	0.164661	0.0379914	0.0418144	0.122469	0.246638	0.0869602	0.0254697	0.0125628	1.58497	0.0457673	0.000708465	0.0058818	0.000802875	0.00317306	0.0645845	0.0191017	0.106748	0.0853027	0.253039	1.46493	0.00522642	0.00451095	0.0018591	0.622073	0.00926916	0.0508563	0	0	0.00984065	0.00444214	0.0716022	0	0.0524001	0	0.00521849	0.00127006	0.444295	0.413207	0.563827
2019-07-13 21:00:29	3.76144	0.906137	1.0115	0.676028	1.31715	0.450155	0.0288381	0.0407258	0.142262	0.0931898	0.150014	0.0329008	0.0352241	0.0806212	0.226046	0.0786534	0.0167752	0.0119825	1.07746	0.0011449	0.00026266	0.000333078	0.0204167	0.0132012	0.0357381	0.0187685	0.0286314	0.0980394	0.218998	0.863575	0.00459123	0.000310951	0.000690236	0.258189	0.00683021	0.0466271	0	0	0	0.00359022	0.0831162	0	0.0576298	0	0.00450903	0.00114026	0.40034	0.397507	0.435606
2019-07-13 22:00:29	2.95718	1.19361	1.04251	0.661653	0.82616	0.372795	0.0299129	0.101684	0.103682	0.0769295	0.101282	0.0355852	0.0377797	0.0575674	0.219194	0.0161208	0.0104315	0.00774084	0.662152	0.00183073	0.000392391	0.000185643	0.000140052	0.0119525	0.147406	0.00995983	0.0150335	0.0856708	0.19908	0.913734	0.00558819	0.000546455	0.000925625	0.135641	0.0214626	0.0365337	0	0	0	0.00355945	0.0708973	0	0.0441361	0	0.00562987	0.00113188	0.34668	0.39422	0.162335
2019-07-13 23:00:29
2019-07-14 00:00:29	4.65806	1.49661	1.21332	0.694559	1.81818	0.580818	0.0424182	0.0912836	0.151531	0.104572	0.120518	0.0395161	0.0429216	0.0510519	0.219704	0.0191884	0.0156576	0.0162789	1.20614	0.0428784	0.000175759	0.000161423	6.92977e-05	0.00515583	0.500429	0.0242337	0.0132873	0.122289	0.197545	1.17978	0.00602546	0.000616966	0.00167321	0.254625	0.0266744	0.00226514	0.145133	0	0.0320326	0.0105557	0.162797	0	0.0661959	0	0.0140949	0.00799294	0.682427	0.439037	0.144567
2019-07-14 01:00:29	5.50589	1.81702	1.47853	1.16223	1.69218	0.678206	0.0437461	0.0764777	0.235838	0.165526	0.147224	0.0523801	0.0569568	0.0723632	0.250186	0.0197533	0.0146584	0.0140619	1.14057	0.00758763	0.000324901	0.0700405	0.00051904	0.00149168	0.274399	0.00488437	0.0170791	0.150188	0.200214	1.15471	0.00487578	0.000190556	0.00169506	0.336949	0.0141583	0.0412351	0.107239	0	0.102742	0.0145461	0.216868	0	0.18715	0	0.0107019	0.00332941	0.47984	1.20561	0.139036
2019-07-14 02:00:29	4.36512	1.39766	1.27995	0.680436	1.50289	0.321595	0.0297268	0.0564201	0.127875	0.0839633	0.0962182	0.0325012	0.0326734	0.0505258	0.214797	0.0437015	0.0105318	0.013495	0.978995	9.89283e-05	0.000156997	0.000314603	0.00465092	0.0127982	0.492168	0.0148342	0.00850103	0.0729555	0.260697	1.10184	0.00435074	0.00151204	0.000992872	0.241485	0.0125876	0.035612	0	0	0.0208878	0.0042941	0.081777	0	0.137555	0	0.00629797	0.00240591	0.449506	0.409409	0.375298
2019-07-14 03:00:29	4.2828	1.19468	1.39044	0.788785	1.27853	0.394054	0.034571	0.0471849	0.155388	0.0328218	0.127127	0.0336997	0.0389209	0.0518583	0.216035	0.0480373	0.0111054	0.015297	0.878944	0.0720638	0.000179565	0.023126	0.000507303	0.00184796	0.435598	0.0111334	0.0123175	0.0889715	0.194833	1.00055	0.00549776	0.000522358	0.00155139	0.293989	0.0425602	0.0354975	0.380616	0	0.0402246	0.00496574	0.091578	0	0.0763663	0	0.00786907	0.00195359	0.406974	0.475162	0.411599
2019-07-14 04:00:29	6.86093	1.91022	1.44149	0.809696	1.59331	0.488705	0.0333924	0.0715034	0.128159	0.0891528	0.116673	0.0359823	0.037237	0.0559029	0.218936	0.0201349	0.0130964	0.0148303	1.41085	0.0939548	0.000236479	0.00147812	0.00064286	0.0147636	0.537023	0.015644	0.00744058	0.11867	0.275844	1.23689	0.00444366	0.00362609	0.00279409	0.340394	0.0615382	0.00143234	0.419837	0	0.00838329	0.00780046	0.0934405	0	0.067158	0	0.00705924	0.00182707	0.501667	0.471646	0.408711
2019-07-14 05:00:29	8.91452	2.26429	1.52932	0.956554	2.30172	0.655678	0.025992	0.0824284	0.211238	0.00812049	0.120097	0.0441929	0.0418966	0.0525328	0.219105	0.0180856	0.0130949	0.0196228	1.99731	1.39537	0.000414536	0.161685	0.00104549	0.0279783	0.824761	0.0124002	0.00120491	0.16131	0.19956	3.24686	0.005537	0.000462492	0.00173534	0.326709	0.0240447	0.0534681	0.111509	0	0.0283383	0.00871861	0.120796	0	0.0954759	0	0.007067	0.00155871	0.684007	0.472894	0.110286
2019-07-14 06:00:29	8.54189	2.22333	1.52692	1.00651	1.46138	0.675346	0.0420598	0.0534938	0.224366	0.141839	0.129932	0.0582645	0.0599412	0.0678614	0.219632	0.0218407	0.0139753	0.0192119	2.4454	1.35997	8.90904e-05	0.000385554	0.0417245	0.00862097	0.449966		0.0171968	0.149885	0.200848	3.75018	0.00606788	0.00061156	0.00109322	0.260598	0.0143323	0.0426755	0.0321148	0	0	0.00629442	0.0717069	0	0.0610948	0	0.00829897	0.00146673	0.591085	0.566414	0.202572
2019-07-14 07:00:29	8.56432	2.18173	1.46477	0.867371	1.32468	0.537094	0.0290289	0.0709931	0.168577	0.110298	0.123005	0.0544565	0.0530618	0.0715637	0.217674	0.0245587	0.0153191	0.0233016	2.51353	0.720623	0.000301869	0.122396	0.020278	0.0188043	0.454795		0.0845056	0.129492	0.198591	2.87602	0.00484527	0.00285814	0.0014948	0.28185	0.0873401	0.00309852	0.30365	0	0	0.0110367	0.0817157	0	0.0852495	0	0.00712322	0.00120976	0.567702	0.579036	0.169327
2019-07-14 08:00:29	8.57948	3.08945	1.61664	1.09797	1.82309	0.568298	0.0419398	0.205032	0.217391	0.0670862	0.213727	0.0639184	0.0690535	0.206577	0.258943	0.228545	0.0598571	0.0260883	2.80186	0.395655	8.1525e-05	0.0385254	0.000756947	0.00520961	0.563211		0.201519	0.139723	0.198368	2.96602	0.00495614	0.00473247	0.00256191	0.76717	0.0782637	0.00460138	0.194439	0	0.0747598	0.0191063	0.170178	0	0.364285	0	0.0103371	0.00121467	0.644844	0.936083	0.712352
2019-07-14 09:00:29	5.33428	2.43567	1.55389	0.898791	1.39973	0.275798	0.019843	0.0895276	0.0885576	0.0667911	0.10338	0.0377193	0.0383138	0.0736871	0.273362	0.0419905	0.0217269	0.0187381	1.58965	0.0300709	0.000301825	0.000187909	0.00310823	0.00399415	0.44847	0.0190464	0.281889	0.0569815	0.278135	1.85478	0.00441404	0.00267276	0.000772833	0.293261	0.0281284	0.0434332	0	0	0.0905093	0.0322798	0.332649	0	0.181107	0	0.00707199	0.00126558	0.519791	1.61638	0.136374
2019-07-14 10:00:29	4.49279	1.52146	1.40694	1.03683	1.89324	0.431146	0.0394472	0.0579233	0.195769	0.126086	0.0890672	0.0384239	0.0413316	0.0625493	0.207106	0.0172724	0.00417471	0.00352487	1.29799	0.00327054	0.000417311	0.00487274	0.00269224	0.0135532	0.164364	0.0325994	0.32083	0.0965769	0.194148	1.63164	0.00400698	0.00475099	0.000905158	0.263879	0.0147562	0.0491503	0	0	0	0.00736936	0.0731497	0	0.0612276	0	0.00183025	0.000360317	0.484674	0.469932	0.119845
2019-07-14 11:00:29	3.17734	1.43191	1.15707	0.691401	1.09447	0.353172	0.0169929	0.028184	0.0580923	0.0433582	0.0392064	0.0246667	0.0255796	0.0576476	0.243053	0.0157509	0.0110581	0.00901723	0.880499	0.00539971	0.000413795	0.000491362	0.00103436	0.0047377	0.395104	0.00678331	0.168634	0.0736234	0.191971	1.04635	0.00390152	0.00312907	0.000486363	0.0862495	0.00861666	0.0522538	0	0	0	0.0154584	0.217861	0	0.0792979	0	0.00600099	0.00134441	0.360636	1.16024	0.107875
2019-07-14 12:00:29	2.48955	1.09594	1.05768	0.499768	0.974157	0.272322	0.0227885	0.0419736	0.047994	0.0324046	0.0339597	0.0120542	0.0106232	0.0434304	0.242987	0.0101317	0.00844792	0.00758514	0.381024	0.00576946	0.000105415	0.000322254	0.000172259	0.0038629	0.094036	0.0162114	0.198799	0.0546988	0.192199	0.713352	0.00450343	0.0013234	0.000632494	0.310668	0.0143051	0.0416209	0	0	0	0.0111656	0.277041	0	0.185011	0	0.00588777	0.00132829	0.292662	1.12034	0.109036
2019-07-14 13:00:29	2.17009	0.702423	0.944041	0.367859	1.65888	0.343697	0.033676	0.0442386	0.0500489	0.00897602	0.0300812	0.0116356	0.00777493	0.0438107	0.212876	0.00871981	0.00784477	0.0071124	0.232301	0.00411869	0.000465867	0.000340458	0.00168964	0.000610983	0.124577	0.0189254	0.129916	0.0747441	0.213797	0.67122	0.00643669	0.00477789	0.000672559	0.164978	0.0114687	0.0609768	0	0	0	0.00501834	0.11878	0	0.039086	0	0.00519854	0.00130287	0.365749	0.230112	0.109269
2019-07-14 14:00:29	1.96781	0.430362	0.925029	0.360269	1.33127	0.344578	0.0301563	0.0501977	0.0473976	0.0155485	0.0568547	0.0142189	0.00985991	0.0452625	0.211018	0.00829332	0.00807219	0.00649364	0.203654	0.0123839	0.000117675	0.00222729	0.0162751	0.0113567	0.126803	0.0163533	0.139303	0.0738062	0.236761	0.480758	0.00649429	0.000575593	0.000670214	0.230392	0.00985431	0.048031	0.0538838	0	0	0.00229794	0.106665	0	0.094929	0	0.00453394	0.00134933	0.398371	0.276981	0.121968
2019-07-14 15:00:29	1.80202	0.354904	0.933396	0.330632	1.53954	0.325097	0.0352286	0.0621127	0.0631109	0.0446415	0.0519928	0.0199517	0.0167136	0.0508597	0.211822	0.00957701	0.00850002	0.00660615	0.202099	0.00659237	0.000238901	0.00203311	0.000987643	0.00675733	0.122459	0.013404	0.0988106	0.0715211	0.193061	0.518792	0.00731676	0.00105696	0.000765706	0.186779	0.01015	0.0456744	0	0	0	0.00524276	0.115451	0	0.0439722	0	0.00421444	0.00143732	0.40847	0.290542	0.135931
2019-07-14 16:00:29	1.75838	0.417624	1.08434	0.390619	1.7735	0.420825	0.0388933	0.0829158	0.0851745	0.0253552	0.0598823	0.0198661	0.0143865	0.0523607	0.211722	0.0117888	0.00949212	0.00912042	0.242978	0.000255214	0.00047691	0.00037529	0.00150965	0.00718479	0.143333	0.0233057	0.224211	0.0889209	0.236337	0.56947	0.00706798	0.000708792	0.00149375	0.286898	0.014514	0.0456308	0.0455234	0	0.00441369	0.00537996	0.137983	0	0.0939523	0	0.00497408	0.00137452	0.409395	0.325004	0.139515
2019-07-14 17:00:29	1.8899	0.850924	1.28196	0.45057	1.28047	0.341478	0.0279776	0.0599087	0.0585948	0.0420467	0.0502763	0.0143789	0.0144765	0.0498095	0.220241	0.0112506	0.00888483	0.00512906	0.243011	0.00107612	9.19824e-05	0.000886446	0.00239421	0.00178324	0.115762	0.0162335	0.181281	0.066497	0.229731	0.652053	0.00512756	0.00446147	0.000827872	0.151277	0.0106175	0.0414613	0	0	0	0.0115791	0.250416	0	0.287808	0	0.00576547	0.00143226	0.333383	0.855775	0.145911
2019-07-14 18:00:29	9.12447	8.95747	2.18533	2.75013	0.219277	0.728804	0.0423751	0.0633196	0.204606	0.0940627	0.167482	0.0317184	0.0341501	0.105406	0.226405	0.135171	0.0196588	0.00627821	0.293306	0.00417888	0.000202717	0.000654074	0.000941875	0.0306319	0.2304	0.0253877	0.52051	0.128327	0.31717	0.582937	0.00152357	0.00301425	0.00107422	0.117791	0.0120703	0.0473214	0	0	0	0.003977	0.0748443	0	0.0651027	0	0.00693226	0.00126945	0.346854	0.499591	0.612608
2019-07-14 19:00:29	9.77948	9.80708	2.167	2.90764	1.08683	0.452677	0.00679843	0.0143837	0.0770031	0.0422604	0.0895202	0.0403347	0.0409681	0.104721	0.256508	0.0446883	0.0190238	0.0097576	0.287376	0.000442366	0.000130417	0.000577581	0.000200385	0.00742171	0.3707	0.0715184	0.162883	0.0804696	0.192218	0.590147	0.000291243	0.000699177	0.000439358	0.0480477	0.00403519	0.0404588	0	0	0	0.0107789	0.185653	0	0.0792626	0	0.00698394	0.00128976	0.334819	0.885583	0.144795
2019-07-14 20:00:29	10.7909	10.0447	2.04183	3.01262	1.04136	0.729992	0.04212	0.0534722	0.178315	0.0908987	0.158715	0.0411527	0.0463679	0.107748	0.234436	0.0648851	0.0114762	0.00614396	0.673599	0.00829721	5.335e-05	0.000448084	0.0182379	0.0209001	0.232932	0.0255113	0.253587	0.135935	0.310819	1.3407	0.00435931	0.00617433	0.000734396	0.141454	0.00788429	0.0421138	0	0	0	0.00355587	0.0743224	0	0.0318162	0	0.00554854	0.00102585	0.379177	0.323434	0.414132
2019-07-14 21:00:29	11.1385	9.99373	2.07002	3.06739	1.37571	0.868857	0.0459995	0.0646166	0.229805	0.125025	0.188596	0.0579267	0.0608391	0.120226	0.271547	0.0245084	0.0120603	0.0067949	1.19297	0.00189103	0.000339835	0.000204873	0.000314082	0.0111473	0.2866	0.0203639	0.0883555	0.168722	0.201321	1.3324	0.00580968	0.000389756	0.00308045	0.219724	0.00918884	0.0417369	0.0183097	0	0.129727	0.00556059	0.111014	0	0.0447409	0	0.00508568	0.00111422	0.438079	0.775392	0.218708
2019-07-14 22:00:29	10.7312	9.58971	2.05869	2.90347	1.35821	0.702	0.0442056	0.0591624	0.162755	0.0819882	0.149402	0.0379243	0.0402991	0.101662	0.241313	0.0209744	0.010112	0.0081639	1.36895	0.0175234	0.000222304	0.000585861	0.0364677	0.0229922	0.227389	0.0237515	0.0291627	0.136371	0.306484	0.853368	0.0052335	0.00469226	0.0047748	0.225179	0.00920614	0.0433242	0.225026	0	0.958515	0.00449135	0.061293	0	0.0464628	0	0.00489835	0.00105464	0.3615	0.376966	0.321854
2019-07-14 23:00:29
2019-07-15 00:00:29	9.96972	8.62101	2.23701	2.95962	2.2715	0.95458	0.0473885	0.0691264	0.239797	0.12756	0.171914	0.0414525	0.0446811	0.0998758	0.222228	0.02663	0.0154784	0.0167651	0.736649	0.000866512	0.000149763	0.0296341	0.0395591	0.00173838	0.283004	0.0215032	0.0166559	0.16761	0.319564	1.24827	0.00515176	0.000664631	0.00165886	0.149651	0.0108165	0.041098	0	0	0.0235019	0.00772001	0.0865081	0	0.0223051	0	0.017133	0.00840806	0.4632	0.388609	0.545054
2019-07-15 01:00:29	10.6183	8.55101	2.14159	2.96951	3.06012	1.24928	0.063609	0.080299	0.275938	0.163505	0.241959	0.0545516	0.0535064	0.102653	0.243623	0.0200132	0.0130836	0.0146345	0.620799	0.00384234	0.000144113	0.000211817	0.00105908	0.00264833	0.422234	0.0111588	0.0116218	0.240542	0.375196	0.844237	0.00656285	0.00649249	0.00113646	0.17465	0.0151709	0.0560518	0	0	0.0267398	0.00800887	0.130461	0	0.0634753	0	0.00987957	0.00376952	0.487046	0.39555	0.119599
2019-07-15 02:00:29	9.87744	8.52658	2.12965	2.91725	1.66772	1.09266	0.0505049	0.22952	0.240293	0.130093	0.195141	0.0435095	0.0464724	0.109249	0.249938	0.0204265	0.0133048	0.0150255	0.639483	0.000745153	5.37289e-05	0.000602172	0.000572634	0.016623	0.336735	0.019913	0.00815696	0.194531	0.343098	0.900035	0.00619463	0.00296251	0.00116215	0.249863	0.0208575	0.0414668	0	0	0	0.012028	0.192381	0	0.123909	0	0.00936441	0.0023843	0.370424	0.923673	0.129744
2019-07-15 03:00:29	9.82366	8.21595	1.95667	2.57231	1.76512	0.917463	0.0380033	0.159411	0.129192	0.0777135	0.161452	0.0356291	0.035684	0.0905477	0.257567	0.0182487	0.0109991	0.0134196	0.661054	0.00124862	0.000151026	0.000255366	0.000229763	0.00284598	0.279162	0.00828851	0.00670968	0.164601	0.315556	1.12314	0.00586038	0.000480277	0.0008271	0.154978	0.0125496	0.038406	0	0	0	0.00916178	0.16983	0	0.17602	0	0.00558394	0.00180666	0.337997	0.763437	0.105373
2019-07-15 04:00:29	9.88252	8.58903	1.94695	2.63403	1.6089	0.839503	0.0330448	0.140265	0.13577	0.0601841	0.180931	0.029393	0.0316047	0.0942518	0.248947	0.016214	0.00995493	0.0111356	0.50349	0.00609006	0.000115904	0.00210742	0.000366122	0.0129865	0.258933	0.00978027	0.00341433	0.150331	0.333256	3.12685	0.00052558	0.000423242	0.000785425	0.187946	0.0123587	0.035058	0	0	0	0.0125828	0.15256	0	0.300701	0	0.0053646	0.00178987	0.31988	0.692139	0.105102
2019-07-15 05:00:29	9.99806	9.52926	2.06874	2.97673	2.18698	1.01633	0.0459181	0.202852	0.207703	0.0682464	0.240811	0.0363356	0.0319066	0.0924895	0.240182	0.0146098	0.00879148	0.00944491	0.420166	0.000291045	0.000269347	0.00010687	0.0394917	0.0153237	0.325948	0.0097913	0.00183889	0.185051	0.38309	9.64133	0.00628124	0.000570995	0.000941543	0.194999	0.0163144	0.0523874	0.103551	0	0	0.00434023	0.10285	0	0.069183	0	0.00434879	0.00144921	0.367111	0.269822	0.0882681
2019-07-15 06:00:29	10.6664	9.81175	2.18103	3.0784	2.21096	1.01543	0.0484797	0.233139	0.219615	0.0977566	0.251842	0.0429559	0.0365911	0.0982988	0.223085	0.016644	0.00949542	0.0118804	0.765815	0.00210021	0.000178986	0.00114703	0.0535934	0.00287279	0.320859	0.0197005	0.00390651	0.190268	0.385343	15.5144	0.00629353	0.000728047	0.00124238	0.245242	0.0222181	0.0551043	0.17975	0	0.0530473	0.00556797	0.114362	0	0.0861012	0	0.0060868	0.00132007	0.440981	0.326381	0.0932818
2019-07-15 07:00:29	9.82887	9.56571	2.11527	2.8837	2.49518	1.14174	0.0509341	0.244532	0.246987	0.0997762	0.239396	0.0420443	0.0385442	0.0956262	0.22863	0.0150839	0.00885654	0.0103298	0.860642	0.000628229	0.000718759	0.000509018	0.003767	0.00312247	0.36077	0.0226119	0.0169881	0.21271	0.376005	9.28781	0.00633427	0.005634	0.000973237	0.21146	0.0201749	0.0641902	0	0	0.029039	0.00396853	0.115582	0	0.0891195	0	0.00481631	0.00135892	0.43818	0.337605	0.094646
2019-07-15 08:00:29	9.74444	8.15082	1.98158	2.66244	2.49143	0.986919	0.0566169	0.303904	0.295472	0.152876	0.256736	0.0584346	0.058262	0.102613	0.222382	0.0177951	0.0104017	0.0121642	1.47065	0.000171174	0.000302042	0.000142842	0.0457837	0.0190589	0.342869	0.0238966	0.146049	0.204201	0.37987	9.58406	0.00625563	0.000617038	0.00154899	0.253505	0.0196175	0.0700232	0.0847742	0	0.562974	0.0107936	0.101728	0.0753735	0.161072	0	0.00787669	0.00143279	0.606718	0.516764	0.121694
2019-07-15 09:00:28	9.85861	8.67569	2.09237	2.80641	2.51048	1.00081	0.0595652	0.0970822	0.29312	0.148024	0.257878	0.0487271	0.046895	0.100107	0.222964	0.0167963	0.00958973	0.011295	0.879346	0.0132537	5.58446e-05	0.00113202	0.050166	0.00309934	0.345331		0.189495	0.186732	0.388562	7.00767	0.000825436	0.00749927	0.000960724	0.251342	0.017243	0.0811551	0.346282	0	0.0174305	0.00538405	0.100192	0	0.509856	0	0.0062958	0.00122702	0.509446	0.394918	0.110696
2019-07-15 10:00:28	10.3984	9.89718	2.43648	3.80754	2.58836	1.08014	0.0586734	0.310628	0.303627	0.157311	0.255117	0.0540334	0.0534453	0.107947	0.228377	0.022532	0.0113048	0.0101699	1.05442	0.0198406	0.00024553	0.0212485	0.0562171	0.00520611	0.360825	0.0218455	0.152251	0.208351	0.391126	7.20268	0.00649993	0.000473631	0.000962016	0.908502	0.0172511	0.0797259	0.0381195	0	0.0205286	0.00468495	0.103609	0	0.116386	0	0.00483064	0.00111257	0.550685	0.672688	0.162757
2019-07-15 11:00:28	12.3129	13.2396	3.33362	5.90405	3.10071	1.30795	0.0748531	0.44491	0.425529	0.218369	0.377409	0.0840266	0.0829039	0.157052	0.228173	0.092991	0.0312092	0.0164514	2.62053	0.00620238	0.00017075	0.000293173	0.0528942	0.0103907	0.432084	0.0284134	0.238405	0.249068	0.484454	7.06709	0.00662042	0.00805461	0.00139475	2.28833	0.0701484	0.0947374	0.301948	0	0.303724	0.0056782	0.145644	0	0.535908	0	0.00523065	0.00125555	0.680994	1.62608	0.338704
2019-07-15 12:00:28	10.8599	9.39173	2.28183	3.19594	2.62159	1.03718	0.059719	0.281212	0.272006	0.14096	0.224545	0.0522102	0.04639	0.106267	0.22576	0.0269702	0.0144845	0.0097212	1.1957	0.00926529	0.000132338	0.00130734	0.000297672	0.002792	0.326727	0.0173425	0.116599	0.180014	0.379639	3.95358	0.00642384	0.0113083	0.00113846	0.632541	0.0407779	0.102538	0.220661	0	0.130401	0.00555383	0.224627	0	0.456891	0	0.00450692	0.0012129	0.623024	0.554507	0.1493
2019-07-15 13:00:28	7.5808	5.80027	1.64355	1.768	2.06632	0.642141	0.051321	0.14924	0.134976	0.0740964	0.120796	0.0319843	0.0237496	0.0794089	0.216482	0.0150588	0.0093148	0.00685128	0.812481	0.0015482	0.000142124	0.000379015	0.000568226	0.00787298	0.216759	0.021329	0.139207	0.125815	0.286076	4.29043	0.00680941	0.00780685	0.000959176	0.457468	0.0294625	0.121134	0.0697082	0	0.0201809	0.00440354	0.146361	0	0.150137	0	0.00462818	0.00133343	0.652737	0.363195	0.119683
2019-07-15 14:00:28	5.5667	3.77386	1.40954	1.2772	2.1116	0.562577	0.0536532	0.148459	0.147017	0.0940798	0.111005	0.0327038	0.0266824	0.0721427	0.215654	0.0135843	0.00897576	0.008222	0.710434	0.00239728	0.00045859	0.000905724	0.0297406	0.00773662	0.203251	0.0235504	0.245514	0.118667	0.194627	4.60648	0.00744039	0.009142	0.000907681	0.442867	0.0237646	0.104906	0.104973	0	0.0988431	0.00474239	0.128457	0	0.180248	0	0.00429787	0.0013009	0.719365	0.3971	0.142838
2019-07-15 15:00:28	5.59481	4.37446	1.91896	1.34798	2.71875	0.694116	0.0531777	0.0971098	0.129617	0.0731101	0.107715	0.0281663	0.0191186	0.0722944	0.214788	0.0152653	0.00932044	0.0085582	0.542881	0.000724332	0.000255461	0.000744053	0.020926	0.0018435	0.879364	0.0127413	0.187661	0.130592	0.266142	2.34732	0.00682136	0.000491169	0.00124458	0.305596	0.019232	0.0937403	0	0	0.091886	0.00587046	0.122437	0	0.128797	0	0.00606254	0.001255	0.623955	0.358023	0.138408
2019-07-15 16:00:28	4.1	2.34775	1.11969	0.837281	2.12298	0.504331	0.0461139	0.0569472	0.0919469	0.0521688	0.0822753	0.0234616	0.0179323	0.065605	0.214671	0.0147607	0.00872519	0.00572453	0.615874	0.00166572	0.000639217	0.0182522	0.000126046	0.00189045	0.177395	0.0100542	0.0723994	0.0972947	0.203992	1.20532	0.00651817	0.00080171	0.000977838	0.220564	0.0149246	0.0733249	0	0	0	0.00567101	0.0943854	0	0.0950637	0	0.00449016	0.00114705	0.556472	0.294808	0.113643
2019-07-15 17:00:28	5.25739	3.7254	0.952174	1.17197	1.28803	0.459462	0.0572554	0.0653919	0.153775	0.0883544	0.12558	0.0389435	0.0328419	0.0758075	0.210385	0.0163675	0.00929028	0.00762309	0.820618	0.013352	7.64777e-05	0.000109534	0.00166205	0.00390581	0.442754	0.0167713	0.15381	0.0964334	0.196731	1.44727	0.00662791	0.000443583	0.000979974	0.361392	0.0185504	0.103737	0.213474	0	0.259216	0.00532446	0.101832	0	0.091398	0	0.00465469	0.00112553	0.563724	0.352665	0.114839
2019-07-15 18:00:28	5.3181	3.18405	0.959377	0.96753	1.36752	0.446795	0.0497787	0.148559	0.154822	0.0862163	0.106924	0.0370499	0.0314868	0.0676113	0.214978	0.0182498	0.0096575	0.00754813	1.01046	0.000623006	0.000184013	9.91547e-05	0.000113247	0.0192515	0.166383	0.0238977	0.180531	0.0990655	0.194986	1.79076	0.00638953	0.00963827	0.000870358	0.29044	0.0178478	0.0798664	0.182441	0	0.161598	0.00492598	0.12088	0	0.102578	0	0.00404079	0.00108061	0.592397	0.369835	0.145244
2019-07-15 19:00:28	4.53184	2.40484	0.761061	0.786371	1.26977	0.380738	0.0488828	0.134786	0.14313	0.0806427	0.0832761	0.0283927	0.0261597	0.058836	0.213631	0.0131681	0.00767352	0.0059301	0.899066	0.000473544	0.000318995	0.000362844	0.00242709	0.0174743	0.148445	0.0228228	0.139963	0.0869019	0.193462	0.951241	0.00638807	0.0051557	0.00083195	0.27528	0.0156419	0.0651775	0.0400191	0	0.0338594	0.0074094	0.0960571	0	0.039434	0	0.00353512	0.00107104	0.519121	0.321621	0.106219
2019-07-15 20:00:28	8.70802	4.01342	1.1386	1.18543	1.56055	0.483419	0.0517192	0.154894	0.153645	0.0817803	0.110649	0.0426523	0.0329663	0.0688826	0.215634	0.0151929	0.00856327	0.00721278	1.07525	0.000660188	0.000129298	0.000280845	0.0243332	0.0233724	0.174715	0.0201427	0.0716142	0.105876	0.194972	1.50154	0.00627771	0.00761276	0.000966816	0.232416	0.0158637	0.0810933	0.161253	0	0.056875	0.0217115	0.0973692	0	0.158135	0	0.00434943	0.00105494	0.585632	0.345837	0.10884
2019-07-15 21:00:28	7.81749	3.44092	0.984788	0.972959	1.4096	0.433215	0.057554	0.13681	0.141034	0.0799099	0.107218	0.0347972	0.03178	0.0660542	0.21471	0.0163992	0.0101515	0.00920147	1.25888	0.000705202	0.00100829	0.000365766	0.00263191	0.0133049	0.513342	0.0201281	0.0382471	0.0973016	0.195154	1.50386	0.00663108	0.00907241	0.000958713	0.224377	0.0193035	0.0753029	0.198878	0	0.0529337	0.0362605	0.0962217	0	0.112022	0	0.00430662	0.00112019	0.664065	0.348647	0.106018
2019-07-15 22:00:28	6.75395	3.23202	0.99956	0.968704	1.44479	0.439707	0.0551183	0.144924	0.137692	0.0824491	0.109992	0.048027	0.0304028	0.0627512	0.20834	0.0139577	0.00834603	0.00891866	1.20143	0.00280218	0.000424129	0.000305402	6.02832e-05	0.0135155	0.520799	0.0189246	0.0228212	0.0936854	0.194298	1.49135	0.00646938	0.00809997	0.000934897	0.228759	0.0210207	0.0735999	0.357001	0	0.0645993	0.0114077	0.0929178	0	0.102649	0	0.00442826	0.00102419	0.605678	0.37248	0.0997498
2019-07-15 23:00:28
2019-07-16 00:00:28	20.7995	6.05768	1.52493	1.36879	2.00275	0.595861	0.0558159	0.160113	0.159402	0.0730794	0.129019	0.038025	0.028899	0.0713048	0.212499	0.0218971	0.0145135	0.0144047	2.70569	0.0038647	0.000277517	0.00086376	0.023326	0.00234342	0.175675	0.0182565	0.0117543	0.106838	0.195826	11.3139	0.0063485	0.000813743	0.00130474	0.202091	0.0200526	0.00445517	0.183838	0	0.0205822	0.0173912	0.101965	0	0.101489	0	0.0124388	0.0074848	0.959905	0.397475	0.117936
2019-07-16 01:00:28	8.03657	2.95931	1.01662	0.80789	1.54121	0.423209	0.0453627	0.0977295	0.101288	0.0499744	0.08497	0.0192763	0.0192492	0.0585833	0.220898	0.0147856	0.0101244	0.0105863	1.48247	0.00052244	0.000203312	0.000139024	0.000286917	0.0167124	0.56719	0.0132377	0.00579432	0.0886152	0.193367	6.56065	0.00661611	0.0083348	0.00116771	0.242447	0.0207455	0.00312941	0.197212	0	0.016173	0.00873541	0.0909588	0	0.0826582	0	0.00725631	0.00336606	0.702968	0.316567	0.09291
2019-07-16 02:00:28	6.2189	2.68326	1.06886	1.17332	1.73323	0.501677	0.0477184	0.146841	0.146573	0.0635474	0.095692	0.0282744	0.0236663	0.0635358	0.206277	0.0134648	0.00898113	0.00959042	1.24959	0.0277054	0.00053515	8.98119e-05	9.84864e-05	0.00476882	0.618565	0.0210733	0.00919289	0.133939	0.196391	6.36905	0.00692213	0.000600676	0.00103789	0.293084	0.0204184	0.0624266	0.123755	0	0.0277021	0.00630765	0.0939517	0	0.0517801	0	0.00660837	0.0023371	0.753379	0.339333	0.0908562
2019-07-16 03:00:28	10.0632	3.8172	1.29241	1.22742	1.96571	0.62269	0.0542896	0.178328	0.163073	0.0430872	0.138932	0.0359096	0.0292926	0.071071	0.216175	0.018146	0.0113606	0.0113852	1.50602	0.0274043	0.000161628	0.000201085	0.00650757	0.0203229	0.669583	0.0138598	0.0118212	0.131121	0.198557	8.70334	0.00635608	0.0106946	0.00130175	0.370541	0.0269699	0.0617824	0.574567	0	0.0792407	0.0207971	0.100778	0	0.0691307	0	0.00668939	0.00190535	0.833991	0.423605	0.0989979
2019-07-16 04:00:28	10.1897	3.85732	1.27924	1.13791	1.8517	0.561507	0.0494503	0.148475	0.147939	0.0266962	0.135489	0.0337199	0.0274517	0.0736405	0.214178	0.0204156	0.0126726	0.0108774	1.8912	0.000413272	0.000129364	0.0039485	0.00287428	0.00239388	0.212232	0.0148375	0.0107015	0.124526	0.199694	5.20479	0.00608729	0.000610861	0.00155179	0.365304	0.043072	0.0544459	0.254671	0	0.0810087	0.0202059	0.102472	0	0.0860322	0	0.00653888	0.00099447	0.972685	0.458084	0.102939
2019-07-16 05:00:28	9.73332	3.71038	1.30819	0.564099	1.87531	0.559479	0.0463124	0.146269	0.147996	0.0237684	0.146262	0.0331663	0.0274649	0.0717655	0.21333	0.0198812	0.0129015	0.0118216	2.29408	0.0284224	0.000526069	0.000104468	0.00775122	0.0240967	0.641261	0.0150009	0.00975426	0.124578	0.197856	4.15572	0.00617544	0.00524808	0.00150831	0.298557	0.0410509	0.00494897	0.831732	0	0.0971889	0.0168937	0.104931	0	0.187483	0	0.00606941	0.00138	1.06077	0.488799	0.0990758
2019-07-16 06:00:28	17.8098	4.4977	1.44157	1.0015	1.91042	0.63952	0.0378233	0.127397	0.134621	0.0159798	0.109678	0.0317715	0.0269963	0.0631257	0.211104	0.0166104	0.0109153	0.0104172	1.46316	0.00932445	0.000359413	0.00101749	0.00161071	0.00427921	0.644552	0.0131339	0.00626816	0.103534	0.194377	2.33457	0.00606918	0.000376898	0.00113249	0.221551	0.0226738	0.063424	0.210613	0	0.0409233	0.00937271	0.103955	0	0.083258	0	0.00469304	0.00144475	0.984618	0.374993	0.0910248
2019-07-16 07:00:28	6.69959	2.05521	1.01071	0.582266	1.5275	0.358791	0.0373486	0.0741036	0.0681862	0.0120974	0.0620682	0.0177712	0.0182265	0.046918	0.209935	0.0115032	0.00775521	0.0082453	1.11419	0.000244045	0.000775286	0.000216206	0.00291727	0.0120272	0.124837	0.0117022	0.00814604	0.0758198	0.237368	1.70814	0.00608575	0.000471642	0.000898742	0.240902	0.0204997	0.00294952	0.19286	0	0.042489	0.00589035	0.0921011	0	0.0613168	0	0.00513103	0.00130087	0.914608	0.308462	0.0826025
2019-07-16 08:00:28	5.29078	1.93374	0.980665	0.624866	1.66252	0.412778	0.0427362	0.129989	0.141059	0.0288904	0.085465	0.0307814	0.0280565	0.05231	0.211737	0.0126878	0.00796419	0.00797903	1.48705	0.0179694	9.29361e-05	0.000539256	0.000993157	0.00879441	0.580656	0.0185382	0.0231675	0.0978332	0.197088	1.67419	0.00629165	0.000483789	0.000795064	0.247477	0.0210698	0.0536824	0.229532	0	0.0536618	0.00545197	0.0946931	0	0.0661992	0	0.00595619	0.00124326	1.03381	0.43196	0.0937757
2019-07-16 09:00:28	4.73616	2.22325	0.967931	0.642695	1.69365	0.416422	0.0412991	0.149249	0.148457	0.0272577	0.10855	0.0347143	0.0335658	0.0563804	0.213014	0.0193324	0.0100324	0.00842157	1.54766	0.000379817	9.25548e-05	0.00232586	0.0032589	0.00320538	0.165757	0.000830953	0.0410239	0.0980161	0.19661	1.64612	0.00667576	0.00941618	0.000828892	0.410252	0.0220359	0.0507776	0.275278	0	0.174967	0.00507693	0.100215	0	0.112263	0	0.00492169	0.00131412	0.972441	0.479196	0.106496
2019-07-16 10:00:28	5.62078	2.43615	1.17652	0.840435	2.00626	0.536998	0.0163057	0.0930205	0.22938	0.00728843	0.130472	0.0528569	0.0526706	0.0637151	0.215919	0.0161058	0.00991968	0.00868172	2.33597	0.000743168	0.000129397	0.000482522	0.0032027	0.0070644	0.68189	0.0287615	0.0734144	0.133466	0.199119	2.27171	0.00648512	0.00971991	0.00108237	0.337876	0.0246178	0.0681498	0.26734	0	0.21129	0.00624806	0.102686	0	0.217315	0	0.00801564	0.00148099	1.11007	0.649136	0.126901
2019-07-16 11:00:28	3.93562	1.18408	0.939725	0.600958	1.92669	0.497794	0.0567762	0.217293	0.21201	0.116019	0.131006	0.043695	0.0447639	0.0635427	0.212933	0.0124837	0.00823419	0.00751154	1.44773	0.000434624	0.000188395	0.000284653	0.000182034	0.00767837	0.186473	0.0190991	0.0963702	0.104468	0.289691	1.66197	0.00668883	0.00968804	0.000907908	0.367841	0.0278784	0.0674609	0.438809	0	0.187046	0.00541434	0.103723	0	0.167	0	0.00512799	0.00193276	0.931556	0.448665	0.100989
2019-07-16 12:00:28	4.54493	1.44614	1.01059	0.624518	1.92245	0.51163	0.053612	0.214849	0.212444	0.129007	0.128419	0.0389368	0.0458455	0.0651492	0.21538	0.0141093	0.00882099	0.00767366	1.70499	0.000919366	0.000305876	0.000699427	9.3793e-05	0.00960501	0.197721	0.024706	0.168316	0.11932	0.198035	1.87917	0.00692118	0.00893965	0.00100566	0.388563	0.0398671	0.0720032	0.53827	0	0.214622	0.00574718	0.145857	0	0.137144	0	0.00466391	0.00168655	1.07251	0.554799	0.116366
2019-07-16 13:00:28	3.66649	1.27497	0.962834	0.509089	1.81396	0.406063	0.0409891	0.104738	0.113894	0.0216111	0.0648754	0.0240459	0.0207746	0.0537241	0.21055	0.0105543	0.00717431	0.00674271	1.05048	0.0025475	0.000163742	0.000169064	0.000783048	0.00668691	0.145284	0.0192782	0.128852	0.0822221	0.194567	2.30928	0.00719657	0.0148201	0.000962846	0.385733	0.0339853	0.0861291	0.0300841	0	0.232441	0.00512909	0.123124	0	0.0654598	0	0.00473803	0.00174864	0.937631	0.374987	0.10037
2019-07-16 14:00:28	3.14565	1.42787	0.922501	0.570438	1.92605	0.43471	0.0435243	0.095556	0.0915837	0.00283819	0.0794638	0.0216189	0.0170058	0.0542262	0.209707	0.00976011	0.00707812	0.00605796	0.809314	0.000231781	0.000188918	0.00035591	0.0820061	0.00857208	0.160121	0.0178898	0.157303	0.0880905	0.193314	4.30239	0.00757376	0.0179061	0.000860591	0.417347	0.0308033	0.0944259	0.299516	0	0.312646	0.00572972	0.11999	0	0.119364	0	0.00460542	0.00207663	0.918757	0.354952	0.105415
2019-07-16 15:00:28	3.02751	0.949173	0.845095	0.370108	1.72905	0.358953	0.0438503	0.0639731	0.0607805	0.0419997	0.0433094	0.0155336	0.0121333	0.0496271	0.209379	0.0114931	0.00781743	0.00497013	0.604429	0.00161712	0.0003875	0.000418164	0.00019092	0.00484806	0.127345	0.0154929	0.0836869	0.0757188	0.224406	4.2256	0.00757737	0.018109	0.000761692	0.423538	0.0282582	0.100749	0.0711298	0	0.327345	0.00534015	0.127674	0	0.0483029	0	0.00365387	0.00184613	0.804213	0.293173	0.103363
2019-07-16 16:00:28					1.63706	0.411306	0.0399185	0.0858445	0.0776313	0.05108	0.062659	0.0193649	0.0151406	0.0473853	0.207684	0.010872	0.0079998	0.00585675						0.0047347	0.150289	0.0150273	0.0766812	0.088417	0.233811		0.00748144	0.0140533	0.00179742	1.70381	0.0275592	0.0657696	1.0958	0	0.181078	0.0051888	0.121437	0	0.230798	0	0.00563321	0.00144404	0.628589	0.33879	0.104732
2019-07-16 17:00:28	3.11044	1.05512	0.822158	0.476924	1.51445	0.392756	0.0465053	0.148828	0.107538	0.064119	0.0890733	0.0265217	0.0226394	0.0664224	0.214121	0.0563001	0.023705	0.00952504	0.813511	0.000494141	0.000100033	7.06462e-05	0.000302388	0.00559271	0.151203	0.0200664	0.0872039	0.0875965	0.19459	2.14091	0.0072676	0.0143007	0.00413553	2.06877	0.0201719	0.0661284	1.02607	0	1.00242	0.0053005	0.12393	0	0.14828	0	0.00605417	0.00105668	0.656074	0.42661	0.197445
2019-07-16 18:00:28	2.73971	1.4045	0.858924	0.539409	1.49883	0.391939	0.0343981	0.112952	0.111158	0.0612449	0.0758544	0.0297018	0.0290828	0.0506467	0.210168	0.0147435	0.00872574	0.00606693	1.00049	0.000315867	6.14118e-05	0.000125903	0.0164811	0.00782792	0.146658	0.0151992	0.0556666	0.0864473	0.193792	2.0903	0.00737521	0.0159032	0.000932433	0.555829	0.017453	0.0707186	0.108069	0	0.256059	0.00481509	0.145538	0	0.274463	0	0.00389758	0.00148339	0.677946	0.348861	0.121362
2019-07-16 19:00:28	2.43439	0.776409	0.692023	0.339177	1.40056	0.328608	0.0385842	0.0663702	0.068217	0.0443467	0.0512591	0.0183652	0.01321	0.0446082	0.208212	0.00941859	0.00633963	0.00553732	0.791397	0.00137884	0.000287425	0.000177055	0.00115351	0.0069292	0.120243	0.0118916	0.0288295	0.0709529	0.192404	1.241	0.00739998	0.000889714	0.000735148	0.396414	0.0168252	0.0688523	0.0311512	0	0.24039	0.00464652	0.122017	0	0.162879	0	0.00364241	0.00150953	0.644325	0.275059	0.0983854
2019-07-16 20:00:28	2.20705	0.555633	0.575991	0.227552	1.16899	0.280849	0.0333782	0.0437486	0.0508392	0.0104523	0.0307454	0.0104465	0.00719468	0.0397693	0.207574	0.00795167	0.00608186	0.00546542	0.481035	0.000252803	0.000373661	0.0118269	0.000132566	0.00518216	0.0993383	0.00972823	0.0206706	0.0572504	0.191345	0.880923	0.00725944	0.0149609	0.000603415	0.349432	0.0159137	0.0535916	0	0	0.192781	0.00451549	0.106209	0	0.0630448	0	0.00373249	0.00147558	0.585818	0.212431	0.0959181
2019-07-16 21:00:28	2.41792	0.773827	0.669146	0.394899	1.13159	0.269991	0.0377231	0.0771822	0.0774851	0.0229561	0.0789142	0.0189112	0.016903	0.0470167	0.202658	0.00886383	0.00642404	0.00428716	0.647594	0.000263013	0.000129959	0.000281757	0.000645478	0.00159073	0.0937548	0.0120584	0.0160245	0.0571999	0.194195	0.881431	0.0074802	0.014709	0.000856554	0.431549	0.0157499	0.0560545	0.310821	0	0.198565	0.00612076	0.108135	0	0.243747	0	0.00504132	0.00136729	0.62995	0.273014	0.110055
2019-07-16 22:00:28	2.90316	1.05475	0.78333	0.618985	1.34471	0.372625	0.0392659	0.111668	0.112108	0.0231138	0.0949356	0.0270976	0.027048	0.0516014	0.208737	0.0102023	0.00680302	0.00532082	1.04597	0.000520063	0.000412829	0.000641996	0.000226113	0.00718165	0.506316	0.0151229	0.0154739	0.0858151	0.19409	1.59101	0.00766717	0.0140473	0.00118866	0.738136	0.0171724	0.00403451	0.22767	0	0.373401	0.00925359	0.118649	0	0.250933	0	0.0058296	0.00143207	0.680702	0.351055	0.134189
2019-07-16 23:00:28
2019-07-17 00:00:28	2.8694	1.14366	0.994538	0.538305	1.86497	0.495774	0.0379151	0.0873157	0.0866991	0.0582965	0.0781787	0.0208686	0.0193914	0.0501567	0.206396	0.0124975	0.00960767	0.00783664	0.830512	0.00748688	0.000320249	0.000174013	0.00128537	0.0177035	0.153555	0.0165395	0.0101942	0.0889336	0.193756	1.08524	0.00759648	0.019426	0.00161956	0.551803	0.0203939	0.00373667	0.176603	0	0.298535	0.00918285	0.133581	0	0.108686	0	0.0146101	0.00800895	0.758256	0.451964	0.16027
2019-07-17 01:00:28	3.58767	1.33246	1.11837	0.774158	1.51073	0.41652	0.0453145	0.129552	0.123528	0.0395168	0.142853	0.0316849	0.0323172	0.0499654	0.207125	0.0134806	0.00958112	0.00796453	1.00777	0.00241187	0.000109067	0.000317984	0.0203142	0.00888635	0.211946	0.000943908	0.0177657	0.12016	0.196151	1.16255	0.00741731	0.0153122	0.00124721	0.436979	0.018814	0.00709098	0.9449	0	0.330763	0.00983103	0.129731	0	0.242378	0	0.00971228	0.00374577	0.719833	0.528266	0.13684
2019-07-17 02:00:28	3.74629	1.68333	1.185	0.855656	2.11514	0.535779	0.0429356	0.161748	0.164003	0.0405075	0.127346	0.0269492	0.0262654	0.0482627	0.209177	0.0123202	0.00895257	0.00790436	0.844198	0.00138182	0.000468015	0.000161779	0.000153078	0.000509002	0.210341	0.0122413	0.0094085	0.124985	0.289824	1.02161	0.00745078	0.0149481	0.00144204	0.449028	0.0205715	0.0528176	0.267808	0	0.26658	0.00803595	0.140249	0	0.179036	0	0.00868187	0.00277214	0.666493	0.53246	0.124376
2019-07-17 03:00:28	4.13252	1.86221	1.06743	0.710427	1.75026	0.44533	0.0361558	0.0896988	0.0936285	0.0193469	0.0747733	0.016495	0.0185471	0.0403898	0.207201	0.0100468	0.00718126	0.00656494	0.773277	0.000232117	0.000170312	0.000283811	0.000325565	0.00166674	0.160691	0.0101567	0.00709878	0.0951388	0.247948	1.21856	0.00694052	0.0176818	0.0010819	0.389152	0.0184748		0.023998	0	0.218987	0.00557029	0.119295	0	0.0699679	0	0.00629793	0.00231809	0.662116	0.418618	0.0963733
2019-07-17 04:00:28	3.51258	1.74249	0.996982	0.637994	1.67842	0.450415	0.0351761	0.0627207	0.067973	0.0129244	0.0715239	0.0138848	0.0114039	0.0401083	0.207634	0.00863827	0.00630566	0.00611109	0.56634	0.000501337	0.000170886	0.000185214	0.000419679	0.00106981	0.155404	0.00764797	0.00493481	0.0943368	0.245874	0.829288	0.00762152	0.0147338	0.000951751	0.387081	0.0176693	0.0494775	0.0726322	0	0.22677	0.00549204	0.11881	0	0.0877375	0	0.00595637	0.00211985	0.639949	0.369289	0.11359
2019-07-17 05:00:28	3.52611	1.90024	0.9317	0.678443	1.53379	0.439337	0.0337388	0.0633901	0.0764367	0.00977984	0.0651384	0.0114939	0.0111204	0.0418701	0.207775	0.00804617	0.00595763	0.00574213	0.585111	0.000742846	0.000521222	0.000209459	0.000654596	0.00632103	0.149683	0.00943398	0.00553601	0.0883206	0.240778	4.91224	0.00730033	0.018112	0.000956308	0.399675	0.0202646		0	0	0.231056	0.00559584	0.11885	0	0.0580692	0	0.00621381	0.00196546	0.637988	0.285326	0.0938972
2019-07-17 06:00:28	4.45846	2.35809	1.10346	1.04677	1.93064	0.633148	0.0505866	0.19445	0.194818	0.114189	0.227664	0.0852933	0.0856505	0.160738	0.289183	0.13522	0.0639265	0.0296682	1.13186	0.00123998	0.000199369	0.000125367	0.027902	0.000731509	0.244201	0.00995589	0.0121336	0.140865	0.372744	7.0133	0.00747773	0.0198419	0.00104428	0.659428	0.0230724	0.00388113	0.139047	0	0.19615	0.00748308	0.154194	0	0.155933	0	0.0071179	0.00202283	0.679906	0.414759	0.104268
2019-07-17 07:00:28	6.27735	3.60651	1.31763	1.50114	2.09612	0.758563	0.0301598	0.288339	0.287236	0.156488	0.276986	0.101432	0.10136	0.170776	0.298637	0.147508	0.0733488	0.0389391	2.84014	0.00508968	0.000137606	0.000437989	0.0106444	0.00411012	0.29254	0.0184684	0.0653974	0.169406	0.412755	14.7142	0.00760785	0.0144606	0.00107831	0.540327	0.0261018	0.00312983	0.292156	0	0.211972	0.00680543	0.156	0	0.213235	0	0.00885507	0.00204668	0.810789	0.563082	0.119871
2019-07-17 08:00:28	7.02913	4.75414	1.41686	1.71618	2.05989	0.740155	0.0471559	0.223874	0.220076	0.115478	0.191559	0.0565501	0.0554689	0.0933435	0.229518	0.0448668	0.0269417	0.0202751	1.62167	0.00161528	0.000209264	0.0179202	0.009655	0.00247023	0.264012	0.0170378	0.125133	0.152009	0.344304	11.6032	0.0076988	0.018284	0.000933817	0.58135	0.0233762	0.000789473	0.0344567	0	0.248654	0.00604514	0.131685	0	0.0972406	0	0.00659578	0.00202722	0.849033	0.470635	0.112274
2019-07-17 09:00:28	3.84529	2.06126	0.947979	0.808721	1.04954	0.359326	0.0397556	0.109964	0.113102	0.0166077	0.102176	0.0259191	0.0235693	0.0557385	0.210407	0.0185206	0.0138296	0.0121148	0.850474	0.000388759	7.54241e-05	0.000118068	0.00100928	0.00688165	0.136935	0.0165533	0.130286	0.079905	0.271592	5.61155	0.00644456	0.0115598	0.00084931	0.529275	0.0201009	0.0535817	0.0663273	0	0.258398	0.00538033	0.118436	0	0.12827	0	0.00578295	0.00196758	0.654333	0.334623	0.0934087
2019-07-17 10:00:28	2.78131	2.52283	1.39782	1.73808	1.91522	0.449563	0.0424314	0.101836	0.0968969	0.0299177	0.100256	0.0231381	0.0195528	0.0502217	0.20886	0.0160168	0.0113156	0.00969969	0.812738	0.00210637	0.000206205	0.000545538	0.00159184	0.00823563	0.167149	0.0172497	0.135593	0.0990326	0.267571	6.56481	0.00859018	0.0163807	0.000841143	3.31531	0.0205715	0.0678856	1.20014	0	0.305558	0.00615283	0.118778	0	0.239309	0	0.00451326	0.00199743	0.686251	0.563808	0.108277
2019-07-17 11:00:28	2.2444	0.814111	0.673642	0.460151	1.40299	0.30217	0.0313136	0.0523656	0.0586901	0.0111969	0.0442727	0.0127362	0.00877697	0.0441165	0.206141	0.010134	0.00811526	0.00814171	0.546289	0.000479795	0.000962454	0.000170234	0.000454174	0.00157573	0.108183	0.0124213	0.0785187	0.0627052	0.192085	2.69776	0.008273	0.0152526	0.000636762	0.647248	0.016541	0.0671551	0.079345	0	0.246302	0.00552453	0.119505	0	0.0566053	0	0.00482424	0.00200054	0.637209	0.255748	0.0854887
2019-07-17 12:00:28	2.22745	0.663443	0.599062	0.375685	1.29441	0.275546	0.0345279	0.0591459	0.0661383	0.0376338	0.0465271	0.0161207	0.0120056	0.0481698	0.205849	0.00947548	0.00814756	0.00746787	0.571286	0.000380206	0.000403017	0.000660179	0.0156935	0.0050341	0.0923396	0.0166795	0.0813162	0.0599432	0.225825	1.30102	0.00849555	0.016278	0.000656313	0.55905	0.0153992	0.0725843	0.0842754	0	0.243121	0.00546144	0.122138	0	0.0776368	0	0.00475302	0.00205942	0.675701	0.245339	0.0916786
2019-07-17 13:00:28	2.0085	0.597587	0.51248	0.323178	1.21192	0.295391	0.0352146	0.042314	0.0466381	0.0285133	0.0396245	0.0115948	0.00768804	0.0429303	0.204832	0.00866001	0.00715736	0.0066097	0.469431	0.00133599	0.000191328	0.00095968	0.0106647	0.00415764	0.107472	0.014884	0.105532	0.0613191	0.191309	0.806677	0.00859342	0.0192183	0.000699066	0.450399	0.0153239	0.0697211	0	0	0.271724	0.00598197	0.144864	0	0.0768001	0	0.0044997	0.00199652	0.670089	0.212901	0.0894615
2019-07-17 14:00:28	1.8333	0.510274	0.576062	0.3495	1.18378	0.265517	0.0310393	0.0462386	0.0458567	0.0314769	0.0511182	0.0120443	0.00830603	0.0435026	0.209253	0.0076581	0.00687831	0.00637286	0.469337	0.000339118	7.665e-05	0.00126448	0.00902614	0.0111092	0.0893126	0.0158554	0.109335	0.0583271	0.192672	1.28463	0.00854838	0.0163071	0.000644714	0.468368	0.0149611	0.0698669	0.0416398	0	0.281263	0.0058278	0.120806	0	0.122935	0	0.00428168	0.00198824	0.633273	0.211448	0.0897518
2019-07-17 15:00:28	1.82171	0.453723	0.66347	0.451841	1.34517	0.298717	0.0401046	0.0944203	0.0919585	0.0201049	0.0553514	0.020638	0.0165733	0.0464953	0.203825	0.00974166	0.00631987	0.00558452	0.468255	0.00110554	0.000245325	0.00100023	0.000692087	0.00251575	0.113559	0.0170967	0.206292	0.0640747	0.192857	1.16141	0.00893194	0.000878306	0.000624219	0.439656	0.0142773	0.0685491	0	0	0.23288	0.0058143	0.122315	0	0.0719587	0	0.00536303	0.00180374	0.600663	0.257757	0.259962
2019-07-17 16:00:28	1.71608	0.557537	0.612273	0.260086	1.2464	0.258066	0.0370991	0.0461619	0.0448095	0.00963181	0.0657036	0.0121947	0.00777222	0.0416438	0.202671	0.00779034	0.00642618	0.00595069	0.277839	0.00108771	0.000468797	0.000726667	0.000270255	0.0046008	0.0858784	0.0143032	0.0765408	0.0541618	0.23397	0.857639	0.00844485	0.0181495	0.000688487	0.428352	0.0143868	0.064622	0	0	0.261568	0.00630313	0.134391	0	0.0684286	0	0.0042589	0.00194488	0.525942	0.195108	0.0955288
2019-07-17 17:00:28	1.59616	0.312621	0.657571	0.246629	1.47572	0.281967	0.0359745	0.0500468	0.0513915	0.0140742	0.0333093	0.0105617	0.00781262	0.0412566	0.207313	0.00786698	0.00594243	0.00543751	0.293031	0.00177289	0.000869453	0.00026206	0.000723925	0.00278537	0.102616	0.0166353	0.176273	0.0600152	0.191571	0.821036	0.00870299	0.0178585	0.000640485	0.432114	0.0154012	0.0647071	0	0	0.229269	0.00637653	0.129693	0	0.0503686	0	0.00491828	0.00198757	0.511144	0.210649	0.212427
2019-07-17 18:00:28	1.7914	0.468207	0.744559	0.509543	1.68333	0.370091	0.0428984	0.134414	0.143492	0.0968244	0.0781713	0.02749	0.0256134	0.0501177	0.204364	0.00901618	0.00687047	0.00587138	0.564972	0.000793793	0.000140305	0.000571913	0.00132123	0.0118477	0.134713	0.0241766	0.277386	0.0850303	0.252298	1.18214	0.0090214	0.0207902	0.00100672	0.486759	0.0155269	0.0602799	0.124295	0	0.30662	0.00658086	0.130363	0	0.109785	0	0.00623482	0.0018346	0.615748	0.344381	0.164211
2019-07-17 19:00:28	1.87297	0.691263	0.684905	0.334067	1.42182	0.301171	0.0379132	0.0795641	0.0782475	0.0501994	0.0565131	0.0187532	0.0178804	0.0456809	0.205815	0.00778171	0.00625959	0.00485272	0.472542	0.0013985	0.000276954	0.000145548	0.00213894	0.00320164	0.113543	0.0188515	0.145957	0.0684281	0.234218	1.08775	0.00868337	0.0186483	0.000713529	0.493035	0.0147275	0.0530663	0.0370858	0	0.281611	0.00563844	0.13301	0	0.0803213	0	0.00449359	0.00180232	0.528256	0.247872	0.11102
2019-07-17 20:00:28	1.68888	0.492239	0.707364	0.31651	1.34217	0.285029	0.0357971	0.0817642	0.0554801	0.0567136	0.0508804	0.0194518	0.0183153	0.0445412	0.206782	0.00913069	0.00691129	0.00547052	0.560955	0.000325422	9.29166e-05	0.000278469	0.00258411	0.00534272	0.0843037	0.0193288	0.142803	0.0658307	0.194003	0.895785	0.00893823	0.0219515	0.000932254	0.551297	0.0411532	0.0640111	0	0	0.446565	0.00669472	0.120958	0	0.0639217	0	0.00601699	0.00176895	0.574458	0.319406	0.131709
2019-07-17 21:00:28	2.09826	0.605519	0.774377	0.361455	1.40424	0.292187	0.0366921	0.0883147	0.0948944	0.0196869	0.0500196	0.0223007	0.0229604	0.0449374	0.201947	0.00992693	0.00713897	0.00575703	0.637854	0.00691039	0.000228665	0.00015131	0.000960399	0.00218319	0.116987	0.0160634	0.0738853	0.0716156	0.195127	0.8389	0.00919766	0.0194132	0.000799562	0.521574	0.054857	0.0497675	0	0	0.583817	0.00709301	0.122003	0	0.0351807	0	0.00638784	0.00185762	0.6048	0.324334	0.14347
2019-07-17 22:00:28	2.09483	0.749259	0.00538229	0.474024	1.59616	0.355316	0.0297472	0.0932314	0.0939019	0.00301951	0.0537683	0.0205963	0.0176584	0.0444301	0.206183	0.00894375	0.0067333	0.00654308	0.537577	0.00252964	0.000369866	0.000195271	0.00253975	0.00508451	0.135389	0.0132047	0.0274197	0.0817643	0.193246	0.807919	0.00891511	0.0236305	0.000779712	0.48182	0.0231898	0.0463995	0	0	0.485735	0.0069058	0.125216	0	0.0278207	0	0.00709519	0.00180656	0.600111	0.295086	0.127877
2019-07-17 23:00:28
2019-07-18 00:00:28	2.90841	2.6707	1.14608	1.06068	2.0182	0.524809	0.0413587	0.129595	0.131921	0.0762038	0.101179	0.0222133	0.0183411	0.0521047	0.209249	0.0127046	0.0102216	0.0099845	0.556174	0.0025713	0.00042279	6.82324e-05	0.0393101	0.00214287	0.158884	0.01511	0.0165817	0.0928843	0.266144	0.835819	0.00891144	0.0223839	0.00146961	0.909947	0.0221761	0.0455373	0	0	0.376917	0.00989372	0.15223	0	0.0459298	0	0.0163318	0.00843369	0.685836	0.365138	0.141585
2019-07-18 01:00:28	3.00286	2.33208	0.932761	0.942928	1.50936	0.49538	0.0273457	0.0956373	0.0894404	0.0545464	0.0918048	0.0213617	0.01732	0.0477674	0.207364	0.011032	0.00797994	0.00880146	0.54939	0.00231156	0.000543171	0.000342626	0.000695753	0.0129968	0.173214	0.0115749	0.00781491	0.101149	0.262143	1.07526	0.00871553	0.0207694	0.00109479	0.816928	0.021728	0.00274152	0.236041	0	0.458329	0.0082412	0.163058	0	0.0784757	0	0.00797667	0.00411198	0.586717	0.302607	0.106363
2019-07-18 02:00:28	4.10727	3.228	1.16981	1.32171	1.72237	0.616419	0.0353702	0.112005	0.11087	0.0555866	0.163792	0.0237211	0.0193595	0.0569453	0.20779	0.0126594	0.00837345	0.00823611	0.681672	0.000890852	0.000100441	0.000303629	0.000249443	0.00100026	0.206519	0.0157837	0.00767291	0.123297	0.316251	1.09615	0.00974402	0.0215024	0.00117604	0.978749	0.0228433	0.00131548	0.290901	0	0.481904	0.00834535	0.200236	0	0.264191	0	0.00744261	0.00324755	0.641587	0.306094	0.102135
2019-07-18 03:00:28	4.98159	4.44681	1.34103	1.69848	1.76906	0.769873	0.0394733	0.148418	0.153687	0.0671174	0.186641	0.0277552	0.0281653	0.0653752	0.213585	0.0140813	0.00835857	0.00807645	0.650288	0.000860764	0.000121478	0.00713897	5.35986e-05	0.0158818	0.232404	0.0112006	0.00633747	0.14172	0.331324	1.05983	0.0093379	0.021475	0.00115261	0.832891	0.0235872	0.00342718	0.371203	0	0.444078	0.00977335	0.18151	0	0.180109	0	0.00636478	0.00263469	0.638154	0.309448	0.100247
2019-07-18 04:00:28	5.63891	5.1163	1.43022	1.88976	1.7542	0.72225	0.0280069	0.163406	0.161022	0.0729059	0.176915	0.0292749	0.0264331	0.0672069	0.212012	0.0145814	0.00836642	0.00807123	0.636279	0.00115537	0.000953008	9.50411e-05	0.000774837	0.00384797	0.239216	0.0100911	0.0068257	0.140926	0.328845	0.825682	0.00925062	0.0215211	0.00120145	0.658499	0.0367053	0.0463661	0.142012	0	0.409436	0.00867556	0.168312	0	0.0968224	0	0.00685105	0.00239979	0.622518	0.381508	0.107198
2019-07-18 05:00:28	5.61945	5.02028	1.39418	1.87263	1.72728	0.874329	0.0367056	0.159646	0.158075	0.0675614	0.194845	0.0296296	0.025999	0.0739715	0.212574	0.0147783	0.008375	0.00697798	0.631851	0.000526824	0.000169964	0.0184072	0.000277754	0.00464997	0.23929	0.0097231	0.00490634	0.141533	0.336766	0.851215	0.00978044	0.024593	0.000969234	0.669999	0.0277036	0.00327588	0.196471	0	0.447541	0.00988339	0.190106	0	0.163964	0	0.00656775	0.00235264	0.676295	0.306067	0.108922
2019-07-18 06:00:28	5.45649	4.59733	1.33062	1.75118	1.73679	0.849128	0.0389374	0.18363	0.186133	0.0845273	0.192077	0.0332584	0.0315769	0.0736774	0.21411	0.0154292	0.00930066	0.00852156	0.746425	0.000601478	0.000245474	0.000335686	0.000148449	0.0171646	0.23241	0.0114396	0.00826506	0.140486	0.335964	1.86945	0.0100343	0.0259512	0.0012998	0.689833	0.025751	0.0491759	0.187751	0	0.449638	0.00908163	0.189123	0	0.148525	0	0.00833534	0.00253904	0.692928	0.525261	0.112482
2019-07-18 07:00:28	6.58784	4.75774	1.31738	1.733	1.63882	0.645642	0.0213353	0.200693	0.20349	0.10001	0.188214	0.0418228	0.0377493	0.0699568	0.213677	0.0144728	0.00896423	0.00770617	1.4941	0.00966804	0.000225234	0.000582405	0.00320626	0.00611815	0.225476	0.0149867	0.0287031	0.134707	0.331613	6.10306	0.0102729	0.018913	0.00136581	0.710645	0.0378444	0.0510302	0.342105	0	0.416899	0.0103031	0.16765	0	0.0951085	0	0.00777706	0.0023506	0.838427	0.435516	0.0997436
2019-07-18 08:00:28	5.9416	4.81705	1.17342	1.52455	1.716	0.604996	0.040685	0.182128	0.173492	0.0946477	0.170918	0.037713	0.0373496	0.0706506	0.212864	0.0166138	0.00921584	0.00797518	1.32147	0.00259251	6.93889e-05	0.000159651	0.0440814	0.00847809	0.218571	0.0194636	0.144542	0.12153	0.325415	6.80513	0.0103494	0.0182142	0.00147636	0.972533	0.0489784	0.00307412	0.250155	0	0.44547	0.0114493	0.242218	0	0.114245	0	0.0077081	0.00218357	0.906674	0.496175	0.109602
2019-07-18 09:00:28	3.84832	3.3869	0.941752	0.902396	1.53419	0.456054	0.0338252	0.106873	0.113174	0.00142851	0.0950507	0.0242094	0.021282	0.052693	0.207678	0.0104239	0.00685165	0.00557914	0.809851	0.000475597	0.000200567	0.00231951	0.00125197	0.00985942	0.158861	0.0194127	0.16537	0.0907932	0.261125	3.13141	0.0101673	0.0163975	0.000961148	0.598695	0.0313056	0.0464977	0.0118678	0	0.537931	0.0102388	0.178923	0	0.0750397	0	0.00580306	0.00214682	1.01076	0.374161	0.0979581
2019-07-18 10:00:28	2.32216	1.73236	0.707841	0.536939	1.44377	0.352085	0.0241988	0.0661408	0.0719016	0.0140872	0.0574108	0.0159859	0.0123813	0.0429369	0.20557	0.0081491	0.00598921	0.00446241	0.444535	0.000566954	0.00015205	0.000479192	0.00706729	0.000122199	0.120581	0.0146305	0.115984	0.0709254	0.234235	1.76298	0.00964365	0.0183238	0.000699537	0.529541	0.0268072	0.0457797	0	0	0.35196	0.0091446	0.154222	0	0.0515293	0	0.00552958	0.00199869	0.603386	0.283134	0.0932292
2019-07-18 11:00:28	1.88554	0.815435	0.658076	0.423699	1.0476	0.201829	0.0291019	0.0541935	0.0520406	0.0336086	0.0468645	0.0136785	0.0109694	0.0429182	0.204177	0.00678531	0.00563695	0.00497904	0.493034	0.00101773	8.15256e-05	0.000274289	0.00206582	0.0050778	0.0782248	0.016464	0.122465	0.0464124	0.191862	1.78982	0.00809384	0.0118484	0.000732673	0.495697	0.0246649	0.0525936	0	0	0.283724	0.00755992	0.129266	0	0.0496065	0	0.0059422	0.00215887	0.582946	0.251391	0.0922332
2019-07-18 12:00:28	2.09249	0.963075	0.682361	0.629058	1.6391	0.354528	0.0382176	0.100777	0.0986245	0.0256066	0.0554692	0.0221572	0.0161665	0.0500672	0.205016	0.00719484	0.00571182	0.00460525	0.528971	0.00140186	0.000205904	0.00106272	0.000324485	0.00771157	0.126102	0.0170385	0.144015	0.0823015	0.193606	5.35737	0.00993524	0.000727149	0.000856436	1.33454	0.0679302	0.0677736	0	0	0.269946	0.00752265	0.137192	0	0.0354039	0	0.00596819	0.0020656	0.647187	0.350344	0.0961846
2019-07-18 13:00:28	1.9101	0.783232	0.575118	0.470151	1.58374	0.322465	0.0367853	0.0958575	0.0811953	0.00377579	0.0628298	0.0198293	0.0159948	0.0469131	0.205101	0.0075743	0.00605596	0.00501691	0.39961	0.00185884	9.02317e-05	0.000391575	0.000123662	0.00236654	0.124989	0.0217027	0.253662	0.0752371	0.192907	1.42155	0.00961684	0.0137611	0.000765515	0.88639	0.0256352	0.055834	0	0	0.30269	0.00827602	0.132754	0	0.0857169	0	0.00676337	0.00198174	0.633765	0.321606	0.106832
2019-07-18 14:00:28	1.64697	0.50028	0.626915	0.256618	1.77706	0.422328	0.0294437	0.0472717	0.0515305	0.0310934	0.0310207	0.0125498	0.00854004	0.0375545	0.203827	0.00660735	0.00563918	0.00503274	0.289357	0.00147106	0.000106393	0.00345988	0.000331249	0.00208933	0.146632	0.017981	0.111885	0.0852404	0.192345	1.03507	0.00927055	0.0179987	0.000701951	0.496394	0.022495	0.0490948	0	0	0.236217	0.00728354	0.12431	0	0.0300146	0	0.00523201	0.00192791	0.577805	0.24207	0.0972558
2019-07-18 15:00:28
2019-07-18 16:00:28
2019-07-18 17:00:28	1.58477	0.662844	0.536468	0.230946	1.01668	0.26044	0.0268164	0.0544149	0.0484642	0.0388665	0.619392	0.0122539	0.0121168	0.0366805	0.207585	0.0275851	0.013222	0.00547695	0.271002	0.00014951	0.000311293	0.000569999	0.000157965	0.00226872	0.0890977	0.0143706	0.120333	0.0566452	0.67702	0.680439	0.00791875	0.0163512	0.00275218	0.570738	0.0410222	0.0400157	0.504186	0	0.372142	0.00942869	0.346359	0.21519	2.91475	0	0.00592749	0.0022073	0.459465	0.202109	0.11269
2019-07-18 18:00:28	2.38954	1.51544	0.765527	0.508513	1.42298	0.360696	0.0442249	0.144565	0.136797	0.0295813	0.404216	0.0316628	0.0295413	0.054169	0.209035	0.0195574	0.0105731	0.0050093	1.42737	0.00162398	0.000374255	0.000976408	0.00665965	0.010683	0.131658	0.0264235	0.214654	0.087312	0.509914	1.22941	0.0110915	0.0179754	0.00164453	0.881597	0.0212218	0.0023993	0.217871	0	0.445775	0.0092167	0.242597	0	1.34067	0	0.00573433	0.00208258	0.59059	0.37084	0.125426
2019-07-18 19:00:28	2.28765	1.39193	0.831987	0.465293	1.49869	0.412188	0.0357165	0.108092	0.110199	0.0282581	0.118316	0.0247669	0.0230905	0.045132	0.20678	0.0123736	0.0082218	0.00581703	0.693238	0.000968316	0.000361934	0.00349559	0.000320453	0.00545193	0.158771	0.0261616	0.178995	0.0946555	0.281754	1.03729	0.00983296	0.0146968	0.000904162	0.56016	0.023138	0.0531892	0.026978	0	0.657384	0.00775983	0.156671	0	0.39856	0	0.00550989	0.00200741	0.576931	0.300067	0.108962
2019-07-18 20:00:28	2.23407	1.91089	0.763605	0.612516	1.59789	0.424058	0.0408342	0.187905	0.183476	0.0563888	0.172937	0.0455554	0.0424085	0.0533079	0.208892	0.0128707	0.00788335	0.00543435	0.87485	0.00530481	0.000140123	0.00051025	0.000103381	0.0181293	0.182431	0.0214652	0.0966307	0.104622	0.199193	1.3383	0.0100016	0.0162381	0.000678745	0.597907	0.0191925	0.000516244	0.512097	0	0.412592	0.00844015	0.156873	0	1.07783	0	0.00650368	0.00200668	0.578299	0.502603	0.113741
2019-07-18 21:00:28	2.5127	1.61956	0.809675	0.532938	1.10193	0.299667	0.0382512	0.134701	0.132978	0.001791	0.116871	0.0306496	0.0288873	0.0452134	0.206703	0.0121881	0.0084509	0.00648655	1.04715	0.0143082	0.000126032	0.000814568	0.000131967	0.0015123	0.105098	0.0190575	0.0362854	0.0828819	0.195893	1.45389	0.0080693	0.0128346	0.000725882	0.581862	0.0195344	0.0417241	0.0537371	0	0.389236	0.00837324	0.134279	0	0.477006	0	0.00532646	0.0019362	0.597645	0.349419	0.132532
2019-07-18 22:00:28	1.96761	0.919029	0.685214	0.434913	1.31032	0.282811	0.0348058	0.0824632	0.0837357	0.0190077	0.0672666	0.0193513	0.0167857	0.0502665	0.206433	0.0273954	0.0129519	0.00589861	0.609128	0.00573755	0.000524408	0.000327452	0.00196703	0.00212511	0.0968371	0.0139113	0.0192095	0.066627	0.194173	0.956356	0.0103815	0.0170785	0.00108422	0.571967	0.0208203	0.0403528	0.0882957	0	0.373128	0.0115968	0.155099	0	0.188606	0	0.0056008	0.00224915	0.541557	0.315464	0.113527
2019-07-18 23:00:28
2019-07-19 00:00:28	2.97424	2.30982	1.07983	0.994739	2.09443	0.608751	0.0380365	0.120398	0.119039	0.0599762	0.114729	0.0184523	0.0161604	0.0460684	0.208068	0.0140932	0.0101584	0.00948041	0.394527	0.000535486	0.000206994	0.000725221	0.000874784	0.0020602	0.180269	0.0148652	0.0151901	0.104224	0.278329	0.771255	0.0109983	0.0185883	0.00125057	0.556711	0.0182177	0.00250583	0	0	0.300313	0.0115156	0.131732	0	0.110529	0	0.0151508	0.00845449	0.681911	0.269657	0.136577
2019-07-19 01:00:28	4.36055	3.89965	1.38036	2.27035	2.44905	0.921489	0.0484352	0.273215	0.265169	0.0252773	0.196708	0.0347597	0.0321127	0.0650239	0.210869	0.0138673	0.00988083	0.00861612	0.444156	0.00201089	0.00014687	0.0287392	0.00042928	0.00169712	0.361609		0.0159098	0.218386	0.346888	0.784395	0.0111915	0.0213891	0.000962278	0.638059	0.0166821		0.0283689	0	0.35981	0.0134708	0.14409	0	0.218074	0	0.00938876	0.00399916	0.622433	0.300455	0.10262
2019-07-19 02:00:28	6.52835	5.81748	1.39351	2.15664	1.9231	1.00361	0.038942	0.178012	0.184372	0.0981121	0.202137	0.0317398	0.0269571	0.0710641	0.213073	0.0154854	0.00929026	0.00739903	0.538625	0.00109081	9.84417e-05	0.000655273	0.00817887	0.00861702	0.295195	0.0107806	0.0117585	0.167544	0.275217	1.06777	0.0113924	0.0176378	0.000900101	0.594148	0.0171396		0.0957669	0	0.429794	0.0100428	0.169186	0	0.44076	0	0.00855866	0.00321731	0.615174	0.262183	0.108824
2019-07-19 03:00:28	7.10451	6.29252	1.86991	2.69993	3.05061	1.45909	0.0547123	0.402945	0.388896	0.0105755	0.270158	0.0430518	0.0414869	0.0735477	0.212829	0.0142576	0.0103324	0.0077562	0.430592	0.00123567	0.000314805	0.000447738	0.00347268	0.00461634	0.499374	0.00214779	0.0307729	0.293714	0.408369	0.965337	0.0110094	0.0226768	0.000847097	0.596748	0.0169176		0	0	0.336991	0.0108899	0.148316	0	0.153056	0	0.00712229	0.00290443	0.733429	0.31313	0.0922882
2019-07-19 04:00:28	9.44765	8.95187	1.99443	3.26114	2.59854	1.26907	0.0489743	0.337857	0.217674	0.00711975	0.290336	0.0377143	0.0360085	0.0783339	0.21507	0.0151701	0.0091801	0.00816184	0.494111		9.25502e-05	0.00393559	0.00228273	0.00272285	0.402107	0.00976004	0.0133857	0.227743	0.419739	1.11753	0.0109805	0.0188075	0.000880917	0.631052	0.0183688		0	0	0.321764	0.00837796	0.147182	0	0.114592	0	0.00835227	0.00295053	0.648062	0.256057	0.0889187
2019-07-19 05:00:28	9.43635	8.73273	1.86434	3.02253	1.97332	1.09925	0.0446085	0.286999	0.283005	0.0369356	0.280093	0.037338	0.0351827	0.0802094	0.21545	0.0156228	0.00921025	0.0075766	0.498276	0.00571409	0.000262524	0.00410181	0.00260374	0.00372128	0.335702	0.00906033	0.00904962	0.185918	0.406404	1.9866	0.0107779	0.0144306	0.000997357	0.599307	0.0205867		0.0161211	0	0.358848	0.010163	0.156608	0	0.182803	0	0.00685887	0.0025746	0.632816	0.252546	0.0872785
2019-07-19 06:00:28	8.89189	8.0221	1.64431	2.55032	1.8882	1.13379	0.0386316	0.210722	0.194273	0.0912726	0.255762	0.0312822	0.0291147	0.0736215	0.213903	0.0151087	0.00829221	0.00701542	0.79678	0.00551767	9.30692e-05	0.000308103	0.00237018	0.00741022	0.322051	0.0101492	0.00900558	0.190483	0.388861	6.01682	0.0113356	0.0211261	0.00110269	0.623656	0.0327001	0.00263789	0.106399	0	0.389225	0.00969658	0.156779	0	0.316075	0	0.00630388	0.00250543	0.622109	0.232982	0.0946986
2019-07-19 07:00:28	9.72857	9.67327	1.83995	2.9109	1.98666	1.14402	0.0402272	0.250194	0.241839	0.118464	0.269179	0.0351142	0.0339769	0.07619	0.215041	0.0151076	0.0084575	0.0070768	0.935839	0.000975865	0.000285781	0.000315032	0.0311536	0.00418147	0.340588	0.0113201	0.0188985	0.195671	0.399309	11.795	0.0114655	0.0214236	0.00135422	0.573423	0.0589072	0.00184595	0	0	0.354196	0.00891972	0.145534	0	0.133116	0	0.00618965	0.00238011	0.647055	0.291986	0.0892631
2019-07-19 08:00:28	10.6769	10.6109	2.06181	3.25219	2.11416	1.3565	0.0414219	0.302138	0.279965	0.139414	0.313996	0.0467565	0.0461982	0.089273	0.218803	0.0184557	0.0100834	0.00703655	1.09132	0.00756177	0.000315663	0.000340691	0.0511293	0.00395497	0.393256	0.0210062	0.0766511	0.222162	0.438624	10.5558	0.0109641	0.0214116	0.00136932	0.6545	0.0565568	0.000964994	0	0	0.51633	0.00893759	0.163819	0	0.136912	0	0.00681449	0.00232604	0.729519	0.319384	0.0984918
2019-07-19 09:00:28	10.8945	11.1556	2.12017	3.48519	2.08986	1.29291	0.0377723	0.326921	0.321349	0.0358445	0.333182	0.04495	0.0466406	0.0921771	0.218561	0.0187559	0.0102616	0.00769633	1.17036	0.0221618	0.000471228	0.000518215	0.0197028	0.0130379	0.388589	0.0195728	0.124983	0.22412	0.44264	6.46112	0.0107939	0.0177443	0.0011368	0.849426	0.0395456	0.0384936	0.0840537	0	0.629582	0.00889844	0.176228	0	0.270028	0	0.00602257	0.00216177	0.727943	0.330144	0.102908
2019-07-19 10:00:28
2019-07-19 11:00:28
2019-07-19 12:00:28
2019-07-19 13:00:28
2019-07-19 14:00:28
2019-07-19 15:00:28
2019-07-19 16:00:28
2019-07-19 17:00:28
2019-07-19 18:00:28	4.17323	2.72197	1.38406	0.913102	4.50813	0.998314	0.0534561	0.23774	0.23258	0.134281	0.158051	0.029938	0.0294317	0.0516564	0.212149	0.0176299	0.0131626	0.0116089	0.712594	0.00130849	0.000153958	0.000278354	0.0703538	0.0138348	0.168678	0.0429659	0.295253	0.104794	0.198007	1.57801	0.00868167	0.00247825	0.00242368	0.676359	0.109996	0.00388563	0	0	0.013287	0.0167253	0.109216	0	0.235001	0	0.0246673	0.0158406	1.16672	0.917683	0.236548
2019-07-19 19:00:28	3.04491	0.929311	0.539611	0.349865	1.65143	0.402167	0.0457752	0.141085	0.134667	0.0870236	0.0794579	0.0218674	0.0233481	0.038938	0.206131	0.0108803	0.00940971	0.00864441	0.603972	0.00420565	0.000108465	0.00363546	0.0366685	0.0062452	0.103927	0.0219691	0.203411	0.0778612	0.196661	1.49153	0.00743867	0.00755398	0.00129344	0.245531	0.243158	0.00245469	0	0	0.0413542	0.00702642	0.0526728	0	0.114676	0	0.0142945	0.00863044	0.493673	0.322219	0.139192
2019-07-19 20:00:28	2.73191	1.53957	0.794395	0.750949	1.48207	0.372643	0.0412119	0.189927	0.185679	0.0354382	0.127344	0.0333567	0.0333049	0.0441687	0.207552	0.0112223	0.00897077	0.00788453	0.843687	0.00199785	0.000153456	0.00408056	0.00189453	0.00457549	0.118742	0.0233738	0.189481	0.103573	0.200112	1.35155	0.00610307	0.00686707	0.000875271	0.36187	0.103605	0.0239492	0.201095	0	0	0.00522314	0.0532771	0	0.401717	0	0.0134098	0.00597374	0.5169	0.439271	0.129132
2019-07-19 21:00:28	4.14832	2.1008	0.864218	0.901004	1.57525	0.480984	0.0412975	0.223471	0.222638	0.139895	0.132805	0.0422776	0.046815	0.0491762	0.209725	0.0125888	0.00938256	0.00746945	1.38172	0.0208917	0.000211741	0.000975651	0.00322506	0.00688974	0.204995	0.00177258	0.0843911	0.130779	0.208766	1.34301	0.00632831	0.000289797	0.00087863	0.267931	0.0506439	0.0215483	0.0204976	0	0	0.00518141	0.0696462	0	0.157905	0	0.0114916	0.00516103	0.569361	0.511073	0.131815
2019-07-19 22:00:28
2019-07-19 23:00:28	6.96995	4.61142	1.77685	2.41507	3.7824	3.10227	0.0749405	0.584377	0.318551	0.379083	0.341922	0.0965884	0.107961	0.0985619	0.237806	0.0475805	0.0233335	0.0154663	4.21416	0.513039	0.000554383	0.190748	0.135788	0.0210747	0.599558	0.0260219	0.153137	0.0237509	0.25638	3.32914	0.00594361	0.00053834	0.0183589	10.2275	0.119351	0.0022979	0.706129	0	5.12437	0.0121579	0.189042	0.394646	0.236406	0	0.0216927	0.00657476	1.75273	2.32832	0.788267
2019-07-20 00:00:28	5.86816	3.47869	1.36457	1.73446	3.25049	2.80727	0.0689611	0.471631	0.445861	0.310169	0.265699	0.0658924	0.076116	0.0896559	0.229075	0.0387662	0.0242413	0.0147548	2.04643	0.552273	0.00863348	0.155653	0.057789	0.0105445	0.785501	0.088004	0.110082	0.0775591	0.222565	2.64301	0.00579296	0.00906684	0.000520413	3.19242	0.123506	0.0417825	0.446708	0	1.80707	0.00939653	0.213214	0	0.132237	0	0.0106629	0.00363296	0.873756	1.15071	0.255568
2019-07-20 01:00:28	7.07583	3.70161	1.90078	2.66421	4.42717	3.55475	0.0776757	0.699103	0.633686	0.1885	0.400082	0.087213	0.096163	0.0851025	0.226154	0.0300683	0.0210982	0.0162778	1.76183	0.504247	0.282478	0.149453	0.127337	0.0128006	1.02018	0.19048	0.0139571	0.171049	0.230534	2.53228	0.00607057	0.00871113	0.00129221	1.22747	0.137583	0.0395337	0.560307	0	1.04772	0.0247828	0.161362	0.537739	0.594212	0	0.0201241	0.0037224	0.82231	1.18304	0.254708
2019-07-20 02:00:28	8.92344	4.25355	1.703	2.11848	3.85709	3.5377	0.0734032	0.511547	0.495541	0.12744	0.315961	0.0678301	0.0744115	0.0777494	0.222433	0.026015	0.0171509	0.0156994	1.65312	0.509364	0.177984	0.0377348	0.0779246	0.0134146	0.977671	0.119934	0.0891794	0.548961	0.224629	0.000949605	0.00601365	0.00646372	0.000803861	1.1703	0.102932	0.00149006	0.3168	0	0.635063	0.0132114	0.144597	0.100741	0.359445	0	0.014007	0.00292675	0.857415	0.929164	0.193509
2019-07-20 03:00:28	7.6232	4.2977	1.77421	2.18695	4.35789	5.25274	0.0641936	0.502834	0.474145	0.152013	0.35993	0.0672344	0.076253	0.0833013	0.230787	0.0329303	0.0217274	0.0185943	2.95618	0.596069	0.170589	0.223842	0.104796	0.0368387	1.28838	0.128063	0.0721954	0.112373	0.233389	12.372	0.00511743	0.0103391	0.0218774	1.74738	0.182503	0.00322611	0.651157	0	1.36979	0.0192929	0.222984	0.346132	0.292838	0	0.0179944	0.0031801	1.39292	1.54752	0.298122
2019-07-20 04:00:28	7.6996	3.96042	1.53038	2.1429	4.76793	7.20435	0.0298712	0.407307	0.392465	0.119432	0.235785	0.0521352	0.0600083	0.0691351	0.218007	0.0223413	0.0158328	0.0162267	1.83857	0.450965	0.00267583	0.0300447	0.0355743	0.0184145	1.58144	0.103667	0.0614441	0.930427	0.236135	2.99359	0.00584035	0.00596752	0.000712497	1.02195	0.117229	0.0296343	0.0888259	0	0.837934	0.0112802	0.145176	0	0.0991516	0	0.0134152	0.00249092	0.913171	0.932521	0.196689
2019-07-20 05:00:28	6.83794	3.93433	1.4763	1.7681	3.76936	4.44376	0.0546697	0.376273	0.364851	0.0845694	0.267538	0.0545828	0.0623108	0.0735339	0.216974	0.019624	0.013701	0.0145205	1.61481	0.416275	0.00156008	0.11413	0.00087888	0.0110414	1.09294	0.069586	0.00561262	0.0548411	0.219905	2.62028	0.00633325	0.00851633	0.00914025	0.943457	0.0960729	0.0303722	0.171388	0	0.521749	0.0093282	0.12759	0.0671441	0.119629	0	0.0223103	0.00247742	0.885429	0.80554	0.155332
2019-07-20 06:00:28	8.15051	3.75836	1.53695	1.77595	3.56925	2.72516	0.0538988	0.439967	0.421627	0.109515	0.276062	0.062254	0.0700953	0.0727659	0.219252	0.0233577	0.0185671	0.018862	2.21051	0.11898	0.12163	0.12975	0.0385917	0.0166912	0.781141	0.104987	0.00884727	0.459572	0.227703	6.92022	0.0056348	0.00287907	0.000890776	0.696642	0.0941948	0.00198867	0.13697	0	0.532253	0.00965462	0.140522	0	0.184928	0	0.0149972	0.00234999	1.04627	0.878708	0.166169
2019-07-20 07:00:28	8.81801	9.02991	1.43585	1.70262	3.40188	2.05853	0.0540808	0.441445	0.399032	0.112162	0.298633	0.0646022	0.0737516	0.0721857	0.21876	0.0214493	0.0181558	0.0188522	2.61415	0.731274	0.00148406	0.187359	0.0688	0.0352392	0.952999	0.105104	0.00928647	0.380791	0.228196	6.57701	0.00510925	0.000545108	0.000889611	0.687044	0.0841772	0.00222655	0.72913	0	0.381557	0.00935215	0.133808	0	0.194244	0	0.010571	0.00220507	0.959224	0.85515	0.144735
2019-07-20 08:00:28	9.9221	4.45694	1.58303	2.13723	4.2065	2.16054	0.0765582	0.82073	0.796413	0.23128	0.391604	0.111046	0.134419	0.106377	0.2282	0.0283789	0.0204896	0.0184077	3.20213	0.789027	0.192093	0.239323	0.102336	0.0244022	1.09788	0.180674	0.010481	0.490532	0.244027	7.16986	0.00549741	0.00810961	0.00167511	0.807287	0.0794037	0.0371349	0.206235	0	0.448438	0.00928342	0.205341	0	0.093907	0	0.0145022	0.00212547	1.10511	1.86593	0.186739
2019-07-20 09:00:28	11.0112	5.83989	2.08242	3.0599	4.94133	2.5226	0.0972294	0.905054	0.872099	0.566258	0.54291	0.146774	0.177397	0.146165	0.24018	0.0434962	0.0256333	0.0198011	5.35102	1.47691	0.104716	1.07643	0.0467838	0.023914	0.785426	0.124759	0.241002	0.113693	0.233863	6.25954	0.0055189	0.00980741	0.00101919	1.01314	0.0817375	0.00231033	0.368733	0	0.716157	0.0128569	0.368732	0	0.380464	0	0.017879	0.00210633	1.34649	2.36833	0.262795
2019-07-20 10:00:28	7.34556	3.85535	1.40478	1.79023	3.49011	1.72409	0.0705229	0.472944	0.453762	0.103664	0.358833	0.0738954	0.0811825	0.100015	0.224314	0.0328913	0.0194598	0.017638	3.44426	0.34091	0.000812366	0.224221	0.0236633	0.0345348	0.507893	0.0459069	0.281611	0.293732	0.223591	3.45266	0.00587611	0.00634921	0.00240243	0.594608	0.0611984	0.0459734	0.564098	0	0.501364	0.00843269	0.152708	0	0.85724	0	0.0154186	0.00214209	0.901236	1.0266	0.213669
2019-07-20 11:00:28	4.58385	2.3346	1.02997	1.07896	2.55701	0.840236	0.0541375	0.254325	0.250248	0.172006	0.25128	0.0410487	0.0416118	0.0923097	0.219413	0.0235431	0.0141485	0.012152	1.4095	0.0331282	0.000256027	0.000279472	0.0154418	0.0088747	0.222177	0.0308747	0.345631	0.138492	0.216485	1.41131	0.00636973	0.000440269	0.00147732	0.319373	0.0452721	0.0668103	0.070361	0	0.0892161	0.0140395	0.0859241	0	0.967958	0	0.008936	0.00212116	0.536773	0.501056	0.140813
2019-07-20 12:00:28	3.65049	1.62919	0.78191	0.743952	2.0251	0.636244	0.0476002	0.169722	0.1503	0.116591	0.244187	0.0332625	0.0291488	0.0992712	0.22	0.0214168	0.012132	0.0108631	0.971017	0.000930084	0.000165306	0.000718015	0.000401138	0.00390079	0.239904	0.0211705	0.137684	0.138159	0.210385	1.02144	0.0068244	0.00891307	0.000901816	0.270533	0.0254133	0.00126733	0.0650067	0	0.00928355	0.00968888	0.104868	0	0.677659	0	0.00690641	0.00238381	0.429243	0.364572	0.129592
2019-07-20 13:00:28	2.95409	1.34735	0.68602	0.718275	1.9281	0.538354	0.0452002	0.173946	0.167728	0.117255	0.154794	0.0360359	0.0333355	0.0733169	0.212127	0.0133507	0.00910485	0.00811808	0.767751	0.012745	0.00047019	0.000310129	0.000199515	0.00440525	0.19542	0.0206752	0.191322	0.102433	0.31913	0.767721	0.00612771	0.0063259	0.000967493	0.196136	0.0156235		0	0	0	0.00645662	0.0837033	0	0.335728	0	0.00640709	0.00228306	0.389391	0.350876	0.123573
2019-07-20 14:00:28	2.57101	1.37036	0.665409	0.661041	1.7628	0.452472	0.0406699	0.113016	0.110677	0.0818212	0.107684	0.0230691	0.0166494	0.0611598	0.208045	0.0107792	0.00857807	0.00727755	0.598417	0.0210974	0.000179454	0.000510593	0.0166477	0.00455182	0.168838	0.0211702	0.206908	0.0935261	0.194988	0.679827	0.0062207	0.00702186	0.000775835	0.200107	0.0167513		0	0	0	0.00526107	0.0933206	0	0.267928	0	0.00586622	0.00198785	0.388753	0.288991	0.131745
2019-07-20 15:00:28	2.38876	1.13487	0.617518	0.467306	2.15597	0.476239	0.045308	0.187896	0.179861	0.112436	0.147487	0.0272258	0.0200012	0.0573151	0.207589	0.0105733	0.00834693	0.00775461	0.611237	0.000707913	6.19618e-05	0.000755489	0.0107223	0.00819303	0.18339	0.0263733	0.249448	0.100912	0.30577	1.73956	0.00730948	0.00944272	0.000843023	0.366336	0.0190964		0	0	0.0075158	0.00533716	0.0800266	0	0.315967	0	0.00584172	0.00225168	0.443858	0.3136	0.143496
2019-07-20 16:00:28	2.10836	1.05254	0.602059	0.412636	1.87208	0.412054	0.0425874	0.0853573	0.0805843	0.059766	0.0498618	0.0166707	0.00941961	0.0507861	0.205693	0.0113584	0.00830682	0.00714844	0.428693	0.00106555	0.000279081	0.00023347	0.0233696	0.000520961	0.139881	0.0187078	0.152091	0.0835025	0.234415	1.75734	0.00683938	0.012429	0.000930929	0.21261	0.0172879		0	0	0.0552979	0.00567032	0.137269	0	0.133919	0	0.00487896	0.00222762	0.451595	0.237551	0.159296
2019-07-20 17:00:28	1.9179	0.878215	0.705413	0.550423	1.93043	0.442266	0.0504124	0.129885	0.123744	0.0836282	0.0698375	0.0213618	0.0170536	0.05091	0.20654	0.013911	0.00964252	0.00794608	0.352419	0.00127238	0.000117403	9.13379e-05	0.0728907	0.0049305	0.168973	0.0333584	0.485201	0.0966097	0.258816	0.753097	0.00777092	0.00120892	0.00153412	0.34919	0.016603	0.0701559	0	0	0.064491	0.00652174	0.107682	0	0.408021	0	0.00657013	0.00224268	0.473116	0.295908	0.179969
2019-07-20 18:00:28	2.0413	1.04391	0.687872	0.515749	1.13646	0.271841	0.0310147	0.0798769	0.082143	0.0643368	0.0699301	0.022226	0.0188015	0.0564061	0.218594	0.01478	0.00956005	0.00688571	0.381827	0.0189731	0.000213553	0.000626423	0.00226558	0.00562063	0.0951392	0.023343	0.264146	0.0516446	0.247248	0.816253	0.0068969	0.000990177	0.00119765	0.145108	0.0164795	0.0606114	0	0	0	0.0154309	0.194816	0	0.477263	0	0.00707601	0.00302438	0.342956	0.803611	0.171858
2019-07-20 19:00:28	2.15271	0.999111	0.681445	0.358739	0.872894	0.200351	0.0256684	0.0477164	0.0452899	0.0372017	0.0435114	0.0145305	0.01333	0.0393093	0.223815	0.0100203	0.0070863	0.00544496	0.319452	0.00165935	0.000175759	0.000263898	0.00635678	0.00264313	0.0708901	0.0117806	0.142161	0.0399302	0.225815	1.23577	0.00560324	0.00535792	0.00117272	0.0996701	0.0135717	0.036793	0	0	0	0.00921905	0.138881	0	0.282571	0	0.00526232	0.00249755	0.272592	0.530235	0.133127
2019-07-20 20:00:28	3.2987	1.46097	0.718949	0.40871	0.984338	0.185641	0.0265604	0.0628816	0.0632863	0.037347	0.0366451	0.0166705	0.0152423	0.0352553	0.22272	0.0173702	0.00854733	0.00634988	0.452675	0.00115739	9.49721e-05	0.000603544	0.0557853	0.000808368	0.0624748	0.0144064	0.198558	0.0396026	0.192615	1.95315	0.00545949	0.00604295	0.00121728	0.12799	0.015539	0.0228665	0	0	0	0.00501134	0.0825876	0	0.089147	0	0.00565305	0.0022139	0.261854	0.405157	0.305096
2019-07-20 21:00:28	4.98746	2.23263	0.895789	0.807896	0.980086	0.248155	0.0225241	0.103631	0.100434	0.0734959	0.0607878	0.0219475	0.0281918	0.0451945	0.204301	0.014647	0.00893995	0.00611224	1.23712	0.0169211	0.000169784	0.000571466	0.00660227	0.0049318	0.103267	0.0163841	0.106316	0.0613318	0.195877	2.3781	0.00477199	0.00292089	0.00107112	0.0920896	0.0159452	0.0202652	0	0	0	0.00323144	0.0550705	0	0.030176	0	0.00707295	0.00229226	0.371048	0.354844	0.200714
2019-07-20 22:00:28
2019-07-20 23:00:28	5.3548	3.18753	1.16189	1.35734	1.74987	0.482435	0.0300626	0.0613139	0.136588	0.00213563	0.0985444	0.034222	0.0314673	0.045074	0.212547	0.0200765	0.0144916	0.0126575	1.41642	0.0118056	4.10457e-05	0.0223968	0.00118489	0.0079842	0.521295	0.0213404	0.0364504	0.092148	0.198142	1.88896	0.00586658	0.000588849	0.00176633	0.240603	0.0222907	0.0302052	0.184986	0	0.315954	0.00877404	0.0928933	0	0.0947777	0	0.0172413	0.00968231	0.652091	0.530037	0.162003
2019-07-21 00:00:28	5.8862	2.65709	0.97987	1.09316	0.913847	0.294045	0.0312011	0.169882	0.166863	0.107117	0.0900542	0.0368425	0.0387388	0.0612553	0.265121	0.0301554	0.0172562	0.0117751	1.42182	0.000413559	0.000721219	0.000270342	0.000164882	0.00682162	0.117249	0.0122204	0.0178586	0.0639896	0.198213	1.77044	0.00505668	0.00608562	0.00164118	0.249941	0.0223047	0.0331488	0	0	0.00632113	0.0139559	0.221619	0	0.100664	0	0.0124642	0.00490487	0.48839	1.53461	0.146221
2019-07-21 01:00:28	4.49119	2.01239	0.729365	0.612901	0.98054	0.267964	0.0210509	0.0515183	0.0531353	0.0264005	0.0452003	0.015397	0.0156718	0.0381901	0.250634	0.0189746	0.0114974	0.00824787	0.649611	0.00163856	0.000190476	0.00272964	0.000866997	0.0139308	0.33825	0.00842487	0.0080815	0.0552448	0.223635	2.99383	0.00727272	0.00100349	0.00116423	0.141136	0.0160308	0.0225973	0	0	0	0.00896837	0.124747	0	0.114771	0	0.00910418	0.00381937	0.318761	0.695013	0.113698
2019-07-21 02:00:28	3.69901	1.74698	0.635972	0.447976	0.781582	0.187223	0.0220663	0.0250202	0.0326077	0.0208422	0.0285662	0.00903817	0.00831594	0.0304925	0.209238	0.00921619	0.00661187	0.00690496	0.415319	0.0199649	0.00116372	0.00020411	0.00486485	0.000759921	0.0624688	0.00717767	0.00427681	0.0368045	0.191331	5.45737	0.00527974	0.000284367	0.00145508	0.114592	0.021479	0.0217646	0	0	0	0.0044375	0.0489524	0	0.0787433	0	0.00663293	0.00318715	0.286339	0.27366	0.0982974
2019-07-21 03:00:28	4.51115	2.04096	0.774918	0.79379	0.814618	0.266304	0.0296538	0.089727	0.0862431	0.0251736	0.0551549	0.019211	0.0199097	0.0376414	0.231802	0.016672	0.00943563	0.00875862	0.860198	0.0185143	0.000192537	0.00159242	0.00481515	0.00231235	0.285314	0.0160447	0.0150875	0.0610042	0.193972	4.86681	0.00467391	0.000264694	0.00221678	0.165626	0.0210979	0.0258981	0	0	0	0.0107391	0.139562	0	0.10638	0	0.00716783	0.00283671	0.370179	0.721854	0.102875
2019-07-21 04:00:28	5.18915	2.19196	0.758668	0.7141	0.701761	0.192297	0.0212847	0.0693784	0.0661162	0.0480192	0.0718279	0.0146223	0.0147066	0.035236	0.22377	0.0148546	0.0107285	0.0093635	0.99529	0.0044846	0.000158959	0.00012109	0.0012998	0.00393479	0.0713207	0.00750381	0.0053825	0.0416103	0.193554	7.45134	0.00438372	0.00459009	0.0015752	0.223689	0.0262825	0.033504	0.019449	0	0	0.00940401	0.126169	0	0.444662	0	0.00902975	0.00288376	0.362037	0.638365	0.104794
2019-07-21 05:00:28	6.31442	2.6536	0.973501	1.01105	1.14582	0.511872	0.0356657	0.189198	0.174783	0.0467029	0.138578	0.0322338	0.0349625	0.0498388	0.230933	0.0184927	0.0128758	0.0117808	1.62903	0.00172734	9.15122e-05	0.00203972	0.00780147	0.00614264	0.369682	0.00445923	0.0203603	0.117162	0.199292	7.00325	0.00515379	0.00532459	0.0130895	0.377021	0.0313719	0.00170818	0.0161609	0	0.0823068	0.0261003	0.240831	0.260629	1.05867	0	0.0156131	0.00318164	0.561232	1.11704	0.139268
2019-07-21 06:00:28	5.52746	2.5244	0.816932	0.715359	0.948242	0.262889	0.0106503	0.0590922	0.0632967	0.0425708	0.0568443	0.0152185	0.0158335	0.0359207	0.208186	0.0119002	0.00799478	0.00797134	1.1223	0.00282901	0.000144328	0.000235267	0.00201026	0.00169769	0.324979	0.00693381	0.00729813	0.0550974	0.19303	3.79463	0.00510374	0.00612097	0.00335112	0.182251	0.0227659	0.00149538	0	0	0	0.00461905	0.0516369	0	0.13331	0	0.0074899	0.00258709	0.518078	0.289461	0.134308
2019-07-21 07:00:28	7.15346	2.94741	0.888645	0.967643	0.994992	0.303827	0.0331539	0.207122	0.197768	0.145017	0.166715	0.0371141	0.042153	0.0548905	0.228246	0.0134263	0.00974534	0.00934697	2.36113	0.0605256	0.000193128	0.000413986	0.000978643	0.00909376	0.33734	0.0188551	0.0452278	0.083802	0.201296	3.84638	0.00561933	0.00510677	0.00143212	0.389862	0.0298304	0.00362589	0.209155	0	0.00185044	0.00967423	0.117364	0	0.313259	0	0.00798306	0.00260771	0.726776	1.02803	0.112471
2019-07-21 08:00:28	6.13089	2.82446	0.817434	0.808143	0.950871	0.237631	0.0301298	0.0892357	0.095252	0.00354336	0.105553	0.0208201	0.0193136	0.0396191	0.211089	0.0110245	0.00763852	0.00826482	1.8893	0.0102576	0.000281629	0.000271183	0.000590639	0.0052156	0.366635	0.0135994	0.113194	0.0605566	0.194738	2.69843	0.00660039	0.0105156	0.00143232	0.294047	0.0242988	0.0443063	0.0888248	0	0.165569	0.00573525	0.0983708	0	0.202347	0	0.00722853	0.00313238	1.12761	0.300916	0.0844858
2019-07-21 09:00:28
2019-07-21 10:00:28
2019-07-21 11:00:28
2019-07-21 12:00:28
2019-07-21 13:00:28
2019-07-21 14:00:28
2019-07-21 15:00:28
2019-07-21 16:00:28
2019-07-21 17:00:28
2019-07-21 18:00:28
2019-07-21 19:00:28
2019-07-21 20:00:28
2019-07-21 21:00:28
2019-07-21 22:00:28
2019-07-21 23:00:28
2019-07-22 00:00:28
2019-07-22 01:00:28
2019-07-22 02:00:28
2019-07-22 03:00:28
2019-07-22 04:00:28
2019-07-22 05:00:28
2019-07-22 06:00:28
2019-07-22 07:00:28
2019-07-22 08:00:28
2019-07-22 09:00:28
2019-07-22 10:00:28
2019-07-22 11:00:28
2019-07-22 12:00:28
2019-07-22 13:00:28	3.57963	0.905874	0.482865	0.164347	0.362632	0.340271	0.027463	0.0573986	0.0681738	0.0375155	0.0429355	0.0154652	0.0137741	0.0433836	0.218752	0.0169947	0.0226558	0.015513	0.637664	0.00224628	0.00026303	0.000387564	3.09852	0.00395018	0.109116	0.0456061	0.270679	0.0677081	0.194452	0.000326207	0.000463464	0.00234325	0.00139368	0.132748	0.012838	0.00102407	0	0	4.8506e-05	0.0248663	0.174822	0	0.0625478	0	0.023225	0.0108294	1.44167	1.03871	0.282043
2019-07-22 14:00:28	3.30633	1.69542	0.464975	0.369306	0.478013	0.140264	0.0246182	0.0559916	0.0492925	0.036839	0.0395367	0.0125049	0.0196065	0.0420479	0.235324	0.0111674	0.0148632	0.0039344	0.501822	0.0190241	0.000252705	0.000251701	0.707365	0.00139323	0.0604035	0.0244664	0.219205	0.0325756	0.192064	0.000309923	0.00716	0.00217544	0.00099157	0.177852	0.00763738	0.000900162	0	0	0	0.0160907	0.107465	0	0.104524	0	0.0124892	0.00555861	0.708313	0.829697	0.159249
2019-07-22 15:00:28	3.25117	1.36774	0.361466	0.296803	0.405616	0.10573	0.0164331	0.0305581	0.0320082	0.0225849	0.0262763	0.00934891	0.0113709	0.0330628	0.230002	0.00931425	0.0123213	0.00543427	0.431948	0.00196805	0.000230251	0.000207163	0.669472	0.00146641	0.0433159	0.0172906	0.189571	0.023674	0.192189	0.000311296	0.0055605	0.000769919	0.000648144	0.0801702	0.006074	0.000986681	0	0	0	0.011322	0.101065	0	0.0545955	0	0.0102962	0.00425338	0.469944	0.614361	0.130006
2019-07-22 16:00:28	3.35383	1.28604	0.440499	0.390823	0.864878	0.21985	0.0226745	0.0726468	0.0636343	0.0418306	0.0465976	0.0169782	0.0167344	0.0402286	0.234573	0.0108625	0.0136046	0.00817374	0.42713	0.0316224	0.00015846	0.000120444	0.920859	0.0039996	0.0901775	0.0123198	0.237045	0.0495569	0.192249	0.000427575	0.00557684	0.0103587	0.000731146	0.13145	0.00855254	0.000529609	0	0	0	0.0131989	0.131257	0	0.0608358	0	0.0103968	0.00457456	0.559091	0.793637	0.158774
2019-07-22 17:00:28	3.86289	1.93413	1.03414	0.872386	0.943081	0.258495	0.0386102	0.115565	0.117093	0.0781949	0.070105	0.0252897	0.0260924	0.0447152	0.22831	0.00991765	0.0120024	0.0073177	1.09939	0.000968629	0.000147396	0.000118421	1.46254	0.00555277	0.0890888	0.0155666	0.185024	0.0702178	0.194524	0.000391714	0.00556267	0.00517279	0.00096294	0.112159	0.00833355		0	0	0	0.0156011	0.168174	0	0.0833531	0	0.00977697	0.0042041	0.553252	0.896173	0.150344
2019-07-22 18:00:28	3.97001	1.84034	0.817569	0.669441	1.03635	0.243031	0.0540321	0.130212	0.127578	0.0797379	0.0744612	0.0233453	0.0191045	0.0409212	0.205526	0.00977908	0.0116907	0.0056172	0.674984	0.00144089	0.000169704	0.000314343	1.42208	0.00362201	0.120685	0.0145204	0.166915	0.0600894	0.193379	0.000449494	0.00582986	0.00616814	0.00161612	0.162682	0.0107686	0.00223051	0.0378884	0	0.06059	0.00603922	0.06047	0	0.134368	0	0.00725426	0.00465343	0.784236	0.282894	0.147139
2019-07-22 19:00:28	4.17595	1.79797	0.715079	0.698931	1.20432	0.226119	0.0303928	0.0851074	0.0760803	0.0539722	0.069566	0.0231722	0.024134	0.0435515	0.228277	0.0100612	0.0100431	0.00674536	0.612922	0.00201785	0.000209747	0.000194526	0.00530407	0.00361361	0.0933186	0.0158363	0.11723	0.0510767	0.193475	0.000289941	0.00636186	0.010549	0.00177373	0.0978243	0.00849371	0.000982992	0	0	0	0.0123251	0.0915425	0	0.356725	0	0.00747724	0.00410311	0.525037	0.842199	0.141189
2019-07-22 20:00:28	5.11591	2.67347	1.08255	1.0431	1.39817	0.361487	0.0409129	0.248985	0.23819	0.153817	0.184875	0.0439019	0.0408479	0.0502862	0.216518	0.0166508	0.0132841	0.00809831	1.44445	0.000406378	0.000194518	0.000270052	2.06239	0.00802546	0.187912	0.0195574	0.206798	0.101752	0.206093	0.000468069	0.00525218	0.00662809	0.00177774	0.252126	0.0727276	0.00358223	0	0	0.208914	0.00654253	1.53721	0	0.132736	0	0.00774556	0.00379621	0.828909	0.561603	0.248487
2019-07-22 21:00:28	5.06716	2.2157	0.984615	0.985691	1.26216	0.354007	0.0215648	0.113277	0.102826	0.0673286	0.0515092	0.0370645	0.0388642	0.0476094	0.207176	0.0170608	0.0133465	0.00771848	1.2636	0.000179778	0.000187685	0.000313417	2.05661	0.00266865	0.157265	0.017151	0.162261	0.0910039	0.19536	0.000401218	0.00428642	0.00807286	0.00121174	0.178334	0.0253182	0.000818512	0	0	0.061101	0.0125415	0.53998	0	0.0676847	0	0.0119165	0.00318315	0.52913	0.526497	0.178189
2019-07-22 22:00:28	4.7858	2.39138	1.02316	1.01553	1.3501	0.308962	0.0347658	0.187756	0.178789	0.0101309	0.104582	0.0304849	0.0267126	0.0378386	0.21384	0.0139315	0.0119837	0.0092498	1.05492	0.000717694	0.000119018	0.000281561	2.07721	0.00230166	0.143337	0.0117525	0.0523465	0.0789866	0.19943	0.000489312	0.00479293	0.00624142	0.00163902	0.31515	0.0570858	0.00449993	0.0544109	0	0.113202	0.00607677	0.0934924	0	0.154941	0	0.00780278	0.00310875	0.657818	0.37581	0.166172
2019-07-22 23:00:28	5.10261	1.89822	0.778479	0.761791	1.28905	0.231834	0.0263341	0.0729059	0.0746405	0.0558309	0.0691028	0.0222109	0.0234328	0.0419861	0.240429	0.0112933	0.0109048	0.00899873	1.04879	0.000481289	0.000152856	0.000574221	1.75463	0.00489521	0.0944453	0.0150992	0.0355306	0.0528015	0.19652	0.000573826	0.00575718	0.00838632	0.0014301	0.147553	0.0295075	0.00172511	0	0	0	0.0226177	0.194144	0	0.324046	0	0.00890253	0.00286051	0.537089	1.02086	0.127815
2019-07-23 00:00:28	5.03296	1.55665	0.625241	0.610921	0.92242	0.196974	0.0256178	0.0658657	0.0633154	0.0277137	0.0817407	0.0170733	0.0152831	0.0326111	0.211904	0.0091615	0.00947692	0.00772815	0.914563	0.000839098	0.000159737	0.000320405	1.52789	0.000914202	0.0896727	0.00890494	0.0107733	0.0468164	0.194156	0.00105852	0.0047438	0.000437061	0.00194056	0.225915	0.0629112	0.00550947	0.354892	0	0.0327904	0.00784777	0.0705843	0	0.216457	0	0.0071006	0.00257028	0.690395	0.277879	0.103181
2019-07-23 01:00:28	5.10905	1.49462	0.545668	0.547028	0.973768	0.24902	0.0301995	0.0723121	0.06876	0.0478842	0.07803	0.0180671	0.0158436	0.0403399	0.210765	0.00985278	0.00965391	0.00776091	0.847945	0.000246647	0.0215399	0.000186201	1.53991	0.000994698	0.106664	0.00838579	0.00887797	0.0567513	0.194078	0.00127817	0.00513349	0.00506988	0.00253774	0.302627	0.146926	0.00571543	0.0517462	0	0.0128533	0.0082725	0.0854021	0	0.0776241	0	0.00734377	0.00277329	0.674613	0.269044	0.103572
2019-07-23 02:00:28	5.08877	1.74136	0.63922	0.619614	1.2473	0.360285	0.0311759	0.117601	0.110056	0.0786371	0.100818	0.029634	0.0268093	0.0427356	0.211745	0.0123947	0.0104144	0.00851863	0.924346	0.000455372	0.000547809	0.00817084	1.90441	0.00547266	0.157526	0.0124939	0.0135827	0.086664	0.194978	0.000890944	0.00489714	0.00593352	0.00523805	0.483821	0.209598	0.00603701	0.21992	0	0.229476	0.00886906	0.159923	0	0.168979	0	0.0102556	0.0024234	0.773747	0.47023	0.178851
2019-07-23 03:00:28	6.23379	2.15874	1.04968	0.981672	1.20388	0.537152	0.0314514	0.131714	0.138816	0.0979311	0.126708	0.0285303	0.027649	0.0502384	0.2144	0.0117788	0.0105245	0.00719775	1.98463	0.0013259	0.00763314	0.000722195	2.13932	0.00428034	0.229589	0.0144377	0.0183652	0.12252	0.200318	0.0010146	0.004539	0.0048155	0.00685044	0.362773	0.133755	0.00681702	0.606137	0	0.497768	0.0101385	0.116058	0.0161741	0.125556	0	0.0119888	0.00224897	1.06351	0.629481	0.1462
2019-07-23 04:00:28		3.7967	1.29007	1.31658	1.58081	1.81504	0.0482659	0.216144	0.23746	0.141353	0.219349	0.0438568	0.043648	0.0561842	0.215037	0.0141253	0.0124875	0.00907022		0.714767	0.148402	0.00628174	2.91371	0.0066253	0.531401	0.043917	0.0451376	0.0304323	0.222367	0.000343912	0.00367611	0.00437205	0.0496523	1.0322	0.158488	0.00870915	0.786402	0	0.734368	0.016916	0.137394	1.08307	0.398096	0	0.0175264	0.00324175	1.42236	1.00076	0.148426
2019-07-23 05:00:28	6.76833	2.19743	0.870383	0.871507	1.27352	0.488288	0.0250079	0.115753	0.117367	0.0997337	0.104311	0.0406949	0.0219734	0.0330676	0.206422	0.0124268	0.0123573	0.0085835	2.87402	0.316612	0.000330759	0.000435906	2.1629	0.00147836	0.211063	0.0213672	0.00127049	0.0144347	0.208009	0.00317069	0.00403453	0.00610133	0.00633398	0.291248	0.131147	0.00511363	0.28107	0	0.381249	0.0143826	0.0795666	0.0304492	0.0673127	0	0.0155367	0.00250147	0.883993	0.54095	0.139778
2019-07-23 06:00:28	7.55976	2.52941	1.10591	1.11888	1.50733	0.585418	0.0368457	0.244336	0.268691	0.183237	0.154447	0.0688595	0.041999	0.0512448	0.216227	0.0139168	0.0136856	0.00717699	2.50716	0.47928	0.045024	0.000416378	2.50042	0.00542809	0.283636	0.0354789	0.00229258	0.0309503	0.210409	0.00125582	0.004163	0.000329215	0.00472417	0.436313	0.113	0.00532683	0.146842	0	0.257762	0.00815514	0.0944172	0	0.0591359	0	0.0113216	0.00218712	0.95221	0.905982	0.123722
2019-07-23 07:00:28	7.67048	4.21038	1.75214	1.73904	2.00394	0.927992	0.0180992	0.197282	0.339762	0.175224	0.17602	0.0531616	0.0522071	0.0600145	0.21875	0.0233485	0.0196362	0.012056	3.76619	1.26915	0.757785	0.422512	2.90977	0.00392504	0.31127	0.0273195	0.190403	0.0140427	0.214157	0.00100028	0.00443517	0.00726829	0.00581616	0.434319	0.075302	0.00497375	0.152864	0	0.160897	0.00845838	0.0775215	0	0.0830984	0	0.0107185	0.0023646	0.78292	0.645079	0.141577
2019-07-23 08:00:28	9.0857	4.74963	1.59761	1.62997	1.68527	0.526522	0.0316908	0.223643	0.218177	0.10031	0.154049	0.0397911	0.0406722	0.0592746	0.216747	0.0232982	0.0165081	0.00940493	2.64162	0.0841554	0.00133318	0.0135462	2.38485	0.0125837	0.213447	0.0206126	0.315504	0.120369	0.202299	0.000374559	0.00434957	0.00731587	0.00503287	0.352436	0.104326	0.00575536	0.0210168	0	0.0538515	0.00600822	0.399528	0	0.0762452	0	0.0093191	0.00269592	0.658557	0.4693	0.121551
[truncated: 447 more rows]
[truncated: 24 more columns]
